# Supplementary material for: Identifying problematic drugs based on the characteristics of their targets
Source: Front Pharmacol. 2015 Sep 1;6:186. doi: 10.3389/fphar.2015.00186 (PMC4555035; doi:10.3389/fphar.2015.00186)
Supplement: Supplementary Table 6 — Computational classification of experimental drugs. [file Table6.XLS]

## Sheet: ChEMBL
Drug	KStar	NaiveBayes	MLP	IB1	Decorate	END	ThresholdSelector	JRip	PART	RandomTree	RandomForest	RotationForest	J48	SVM	Rejection_Score
(-)-(r)-n-(1-(3-(4-ethoxyphenyl)-4-oxo-3,4-dihydropyrido[2,3-d]pyrimidin-2-yl)ethyl)-n-(pyridin-3-ylmethyl)-2-(4-(trifluoromethoxy)phenyl)acetamide	1	0.999993	0.996447	1	0.999757	1	1	1	1	1	1	0.999347	1	1	0.998598
(-)-3-hydroxy-n-cyclobutylmethylmorphinan	1	0.999997	0.999977	1	0.993962	1	0.999912	0.997571	1	1	1	0.999711	1	1	0.999896
(-)-4-((1r,2r)-2-hydroxycyclohexyl)-2-(trifluoromethyl)benzonitrile	0.999994	0.999995	1	1	0.893863	1	0.999382	0.998342	1	1	1	0.998348	1	1	0.999447
(-)-6-propyl-5,6,6a,7-tetrahydro-4h-dibenzo[de,g]quinoline-10,11-diol	0.003106	0.108358	0.092971	0	0.02	0	0.408993	0	0	0	0	0.110345	0	0	0.068808
(-)-cromakalim	0.480621	0.179681	0.880153	0	1	1	0.30234	0.999286	1	1	0.4	0.01076	1	0	0.457178
(-)-debromoflustramine b	0.999576	0.980104	0.996437	1	0.98366	1	0.66794	0.998521	1	1	1	0.996796	1	1	0.997603
(-)-dihydrocubebin	0.00011	0.07258	0.000291	0	0.031501	0	0.217067	0	0	0	0	0.001471	0	0	0.000624
(-)-epigallocatechin gallate	0.019406	0.232641	6.9e-05	0	0.142857	0	0.350369	0	0	0	0	0.003654	0	0	0.007709
(-)-h-dmt-tic-beta-ala-o-3-hydroxy-n-cyclobutylmethylmorphinan	1	0.989424	0.999959	1	0.992597	1	0.736444	0.999178	1	1	1	0.998585	1	1	0.999515
((2r,3r)-2-benzhydryl-1-aza-bicyclo[2.2.2]oct-3-yl)-(2-iodo-benzyl)-amine	1	0.999964	0.999574	1	0.990402	1	0.959188	1	1	1	1	0.999759	1	1	0.999778
((2s,3s)-2-benzhydryl-1-aza-bicyclo[2.2.2]oct-3-yl)-benzyl-amine	1	0.999964	0.999574	1	0.990402	1	0.959188	1	1	1	1	0.999759	1	1	0.999778
((s)-2-benzhydryl-1-aza-bicyclo[2.2.2]oct-3-yl)-(2-methoxy-benzyl)-amine	0.999673	0.976876	0.99923	1	0.999476	1	0.631821	0.999286	1	1	1	0.999367	1	1	0.999423
([5-(4-methyl-1-piperazinyl)-2-({methyl[(8s)-5,6,7,8-tetrahydro-8-quinolinyl]amino}methyl)imidazo[1,2-a]pyridin-3-yl]methanol)	0.011617	0.128818	0.000287	0	0.051587	0.013889	0.376236	0.020408	0.017143	0	0	0.003187	0.013889	0	0.00503
(+)-(s)-{3-[(4-chlorophenyl)(2-chloropyridin-3-yl)methoxy]azetidin-1-yl}piperidin-1-ylmethanone	0.020305	0.106148	6e-05	0	0.051587	0.013889	0.339217	0.020408	0.017143	0	0	0.003654	0.013889	0	0.008006
(+)-taxifolin	0.992854	1	0.998986	1	0.989434	1	0.556601	1	1	1	1	1	1	1	0.99728
(+/-)-(3-[(4-chlorophenyl)-(2-chloropyridin-3-yl)methoxy]azetidin-1-yl)piperidin-1-ylmethanone	0.373377	0.079794	0.89779	1	1	1	0.245342	0.999286	1	1	0.7	0.856144	1	1	0.709103
(+/-)-11-[2-(2-methoxyphenyl)acetyl]-1-phenyl-(1r,8r,9s,13s)-11-azatetracyclo[6.5.2.02,7.09,13]pentadeca-2,4,6-triene-9-carboxylic acid (rpr104213)	0.024538	0.107853	7.4e-05	0	0.051587	0.013889	0.375641	0.020408	0.017143	0	0	0.0021	0.013889	0	0.008904
(+/-)-11-[2-(2-methoxyphenyl)acryloyl]-1-(4-methylphenyl)-(1r,8r,9s,13s)-11-azatetracyclo[6.5.2.02,7.09,13]pentadeca-2,4,6-triene-9-carboxylic acid (rpr130401)	0.024538	0.107853	7.4e-05	0	0.051587	0.013889	0.375641	0.020408	0.017143	0	0	0.0021	0.013889	0	0.008904
(+/-)-3-(3-bromo-4-(2,4-difluorobenzyloxy)-6-methyl-2-oxopyridin-1(2h)-yl)-n,4-dimethylbenzamide	0.999188	0.918861	0.988453	1	0.999476	1	0.519919	0.999286	1	1	1	0.977004	1	1	0.988215
(+/-)-3-(4-phenylbutyl)-2,3,4,5-tetrahydro-1h-3-benzazepine-1,7-diol	0.215302	0.986729	0.357384	0	0.442937	0	0.703201	0.999277	0.001522	0	0.1	0.5	0	0	0.357562
(+/-)-debromoflustramine b	0.998093	0.357377	0.998845	1	0.960492	1	0.508233	0.998571	1	1	1	0.998266	1	1	0.998401
(+/-)-furowanin b	1	0.999429	1	1	0.504132	1	0.861328	0.997226	1	1	1	1	1	1	1
(+/-)-wiedendiol b	0.11457	0.999804	0.000434	0	0.033704	0	0.79768	0	0	0	0	0.00356	0	0	0.039521
(1-(2-morpholinoethyl)-1h-indol-3-yl)(2,2,3,3-tetramethylcyclopropyl)methanone	1	0.999614	0.999898	1	0.992574	1	0.540766	0.998456	1	1	1	0.999351	1	1	0.99975
(1-{2-[4-(n-hydroxycarbamimidoyl)-benzoylamino]-propionyl}-1,2,3,4-tetrahydro-pyridin-4-yloxy)-acetic acid ethyl ester(ro 48-3657(sibrafiban))	0.000542	0.103364	2.1e-05	0	0.03229	0	0.392594	0	0	0	0	0.0013	0	0	0.000621
(1-{3-[2-fluoro-4-(imino-thiazolidin-3-yl-methyl)-benzoylamino]-2,2-dimethyl-pentanoyl}-piperidin-4-yl)-acetic acid ethyl ester(nsl-96184)	0.267014	0.390817	0.000325	0	0.00122	0	0.354598	0	0	0	0	0.003654	0	0	0.090331
(1-cyclohexyl-2-{(s)-2-[4-(1-imino-ethyl)-benzylcarbamoyl]-azetidin-1-yl}-2-oxo-ethylamino)-acetic acid	0.046486	0.789076	7.4e-05	0	0.00122	0	0.482965	0	0	0	0	0.003654	0	0	0.016738
(1-phosphono-2-pyridin-2-yl-ethyl)-phosphonic acid	0.996275	1	0.999894	1	0.988234	1	0.368478	0.996329	1	1	1	0.999552	1	1	0.998573
(1r,2s,3r,5r)-3-(6-amino-9h-purin-9-yl)-5-(hydroxymethyl)cyclopentane-1,2-diol	0.999041	0.984596	0.999988	1	0.938615	1	0.689503	1	1	1	1	0.997794	1	1	0.998941
(1r,4ar,4br,10ar)-7-isopropyl-1,4a-dimethyl-1,2,3,4,4a,4b,5,6,10,10a-decahydro-phenanthrene-1-carboxylic acid	0.680447	0.04891	0.997011	1	1	1	0.30899	0.999286	1	1	1	0.997541	1	1	0.891666
(1r,7s)-2,6-dimethyl-4,10-dioxa-tricyclo[5.2.1.0*2,6*]decane-3,5-dione	0.924884	0.094975	0.999872	1	1	1	0.154762	0.999286	1	1	1	0.889666	1	1	0.938141
(1r,7s)-4,10-dioxa-tricyclo[5.2.1.0*2,6*]decane-3,5-dione	0.974445	0.084412	0.999968	1	1	1	0.128335	0.999286	1	1	1	0.98326	1	1	0.985891
(1s,2r,4ar,6as,6bs,7r,9as,10as)-2-acetoxy-1,4a,6a,10a-tetramethyl-7-(4-methyl-2-oxo-pent-3-enyl)-8-oxo-2,3,4,4a,4b,5,6,6a,6b,7,8,9a,10,10a,12,12a-hexadecahydro-1h-9-oxa-pentaleno[2,1-a]phenanthrene-1-carboxylic acid	0.012425	0.99684	0.000358	0	0.047312	0.001715	0	0	0.001089	0	0	0.000553	0.001715	0	0.004445
(1s,3r,4r)-n-((6r,9r,19r)-1-amino-6-carbamoyl-9-(3-guanidinopropyl)-1-imino-19-methyl-8,11,18,21-tetraoxo-2,7,10,17,20-pentaazahexacosan-26-yl)-3-(6-amino-9h-purin-9-yl)-4-hydroxycyclopentanecarboxamide	1	0.963217	0.999952	1	0.965287	1	0.650923	1	1	1	1	0.99924	1	1	0.999731
(2-benzofuran-6-yl-ethyl)-((r)-5-methoxy-1,2,3,4-tetrahydro-naphthalen-1-ylmethyl)-methyl-amine	0.987061	0.081311	0.969615	1	1	1	0.136223	0.999286	1	1	1	0.996794	1	1	0.98449
(2-chloro-6-methyl-phenyl)-[8-((s)-3-methyl-piperazin-1-yl)-2,5,9,9b-tetraaza-cyclopenta[a]naphthalen-4-yl]-amine	0.999994	0.992265	0.999991	1	0.966712	1	0.696554	1	1	1	1	0.998577	1	1	0.99952
(2-hydroxy-4-morpholinophenyl)(phenyl)methanone	0.992587	0.306055	0.999997	1	1	1	0.360988	0.999286	1	1	1	0.993489	1	1	0.995358
(2-iodo-5-nitrophenyl)(1-((1-methylpiperidin-2-yl)methyl)-1h-indol-3-yl)methanone	1	0.999614	0.999898	1	0.992574	1	0.540766	0.998456	1	1	1	0.999351	1	1	0.99975
(2-methoxy-5-trifluoromethoxy-benzyl)-((2s,3s)-2-phenyl-piperidin-3-yl)-amine	1	0.999964	0.999574	1	0.990402	1	0.959188	1	1	1	1	0.999759	1	1	0.999778
(2-methoxy-benzyl)-((1r,4s)-2-phenyl-piperidin-4-yl)-amine	0.999486	0.975321	0.998936	1	0.999476	1	0.62588	0.999286	1	1	1	0.999367	1	1	0.999263
(2r,3r,4s,5r)-2-(6-amino-2-((s)-1-hydroxy-3-phenylpropan-2-ylamino)-9h-purin-9-yl)-5-(2-ethyl-2h-tetrazol-5-yl)tetrahydrofuran-3,4-diol	1	0.995134	0.999509	1	0.994413	1	0.741368	0.998572	1	1	1	1	1	1	0.999836
(2r,3r,4s)-4-benzo[1,3]dioxol-5-yl-1-[(2,6-diethyl-phenylcarbamoyl)-methyl]-2-(4-propoxy-phenyl)-pyrrolidine-3-carboxylic acid	1	0.992668	0.998169	1	0.982235	1	0.54988	1	1	1	1	1	1	1	0.99939
(2r,3r,4s)-4-benzo[1,3]dioxol-5-yl-2-(3-fluoro-4-methoxy-phenyl)-1-{2-[(pentane-1-sulfonyl)-propyl-amino]-ethyl}-pyrrolidine-3-carboxylic acid	1	0.896947	0.999616	1	0.998435	1	0.56673	0.999167	1	1	1	0.998743	1	1	0.999453
(2r,3r)-3-[(s)-1-(4-acetimidoylamino-butylcarbamoyl)-3-methyl-butylcarbamoyl]-oxirane-2-carboxylic acid	0.999235	0.438986	0.999995	1	1	1	0.468041	0.999286	1	1	1	0.995027	1	1	0.998086
(2r,3s)-n*4*-hydroxy-2-isobutyl-n*1*-((s)-1-methylcarbamoyl-2-phenyl-ethyl)-3-phenylsulfanylmethyl-succinamide	0.012372	0.581189	0.000394	0	0.00122	0	0.473676	0	0	0	0	0.000466	0	0	0.004411
(2r,4s)-4-phosphonomethyl-piperidine-2-carboxylic acid	0.293917	0.537087	0.001554	0	0.00122	0	0.418619	0	0	0	0	0.0021	0	0	0.09919
(2s,3r,11bs)-2-(((s)-6,7-dimethoxy-1,2,3,4-tetrahydroisoquinolin-1-yl)methyl)-3-ethyl-9,10-dimethoxy-2,3,4,6,7,11b-hexahydro-1h-pyrido[2,1-a]isoquinoline	1	0.97816	0.999867	1	0.999476	1	0.704667	0.999286	1	1	1	0.999033	1	1	0.999633
(2s,3r)-2-({(s)-1-[(s)-2-[(s)-2-[(s)-2-benzoylamino-3-(4-hydroxy-phenyl)-propionylamino]-6-((s)-2-benzyloxycarbonylamino-5-guanidino-pentanoylamino)-hexanoylamino]-3-(3h-imidazol-4-yl)-propionyl]-pyrrolidine-2-carbonyl}-amino)-3-methyl-pentanoic acid	1	0.97664	0.99998	1	0.985642	1	0.677832	0.999261	1	1	1	0.998695	1	1	0.999558
(2s,3r)-3-((s)-1-carbamimidoyl-piperidin-3-ylmethyl)-4-oxo-1-[4-(6-phenyl-hexanoyl)-piperazine-1-carbonyl]-azetidine-2-carboxylic acid	0.119991	0.438468	9.1e-05	0	0.00122	0	0.37844	0	0	0	0	0.003654	0	0	0.041245
(2s,3r)-3-cyclopentylmethyl-n-hydroxy-4-oxo-4-piperidin-1-yl-2-(3,4,4-trimethyl-2,5-dioxo-imidazolidin-1-ylmethyl)-butyramide	0.999359	0.44703	0.999652	1	1	1	0.471367	0.999286	1	1	1	0.995262	1	1	0.998091
(2s,3r)-n4-((s)-2,2-dimethyl-1-methylcarbamoyl-propyl)-n1-hydroxy-2-hydroxymethyl-3-(4-methoxy-phenyl)-succinamide	0.699168	0.664785	0.003814	0	0.00122	0	0.567998	0	0	0	0	0.222561	0	0	0.308514
(2s,3s,4r,5r)-5-(6-amino-9h-purin-9-yl)-n-ethyl-3,4-dihydroxy-tetrahydrofuran-2-carboxamide	1	0.99997	0.999419	1	0.984723	1	0.885781	0.99728	1	1	1	0.999646	1	1	0.999688
(2s,3s,4r,5r)-n-((6r,9r,12r,15r,18r,21r,31r)-1-amino-31-(4-aminobutyl)-6-carbamoyl-9,12,15,18,21-pentakis(3-guanidinopropyl)-1-imino-8,11,14,17,20,23,30,33-octaoxo-2,7,10,13,16,19,22,29,32-nonaazaoctatriacontan-38-yl)-5-(6-amino-9h-purin-9-yl)-3,4-dihydroxytetrahydrofuran-2-carboxamide	1	0.963217	0.999952	1	0.965287	1	0.650923	1	1	1	1	0.99924	1	1	0.999731
(2s,3s,4r,5r)-n-((6r,9r,19r)-1-amino-19-(4-aminobutyl)-6-carbamoyl-9-(3-guanidinopropyl)-1-imino-8,11,18,21-tetraoxo-2,7,10,17,20-pentaazahexacosan-26-yl)-5-(6-amino-9h-purin-9-yl)-3,4-dihydroxytetrahydrofuran-2-carboxamide	1	0.963217	0.999952	1	0.965287	1	0.650923	1	1	1	1	0.99924	1	1	0.999731
(2s,3s,4r,5r)-n-((6r,9r,19r)-1-amino-6-carbamoyl-9-(3-guanidinopropyl)-1-imino-19-methyl-8,11,18,21-tetraoxo-2,7,10,17,20-pentaazahexacosan-26-yl)-5-(6-amino-9h-purin-9-yl)-3,4-dihydroxytetrahydrofuran-2-carboxamide	1	0.963217	0.999952	1	0.965287	1	0.650923	1	1	1	1	0.99924	1	1	0.999731
(2s,3s,4r,5r)-n-(6-((r)-1-amino-5-guanidino-1-oxopentan-2-ylamino)-6-oxohexyl)-5-(6-amino-9h-purin-9-yl)-3,4-dihydroxytetrahydrofuran-2-carboxamide	1	0.967306	0.99975	1	0.999476	1	0.65338	0.999286	1	1	1	0.999033	1	1	0.999594
(2s,3s)-2-benzhydryl-3-(3,5-bis-trifluoromethyl-benzyloxy)-1-aza-bicyclo[2.2.2]octane	1	0.999964	0.999574	1	0.990402	1	0.959188	1	1	1	1	0.999759	1	1	0.999778
(2s,3s)-n3-hydroxy-1-methyl-n2-(4-((2-methylquinolin-4-yl)methoxy)phenyl)piperidine-2,3-dicarboxamide	0.814271	0.931928	0.023835	0	0.5	0	0.562091	0.999286	0	0	0	0.401996	0	1	0.413367
(2s,4as,6as,6br,8ar,10s,12as,12br,14br)-10-acetoxy-2,4a,6a,6b,9,9,12a-heptamethyl-13-oxo-1,2,3,4,4a,5,6,6a,6b,7,8,8a,9,10,11,12,12a,12b,13,14b-icosahydropicene-2-carboxylic acid	0.191508	0.607089	0.000448	0	0.481132	0	0.607713	0	0.017143	0	0	0.283275	0	0	0.15841
(2s,5s)-2-(3-methanesulfonyl-5-methoxy-4-propoxy-phenyl)-5-(3,4,5-trimethoxy-phenyl)-tetrahydro-furan	1	0.999991	0.998177	1	0.996214	1	0.991901	1	1	1	1	0.999498	1	1	0.999225
(2s)-1,1,1-trifluoro-2-[4-(1h-pyrazol-1-yl)phenyl]-3-(4-{[1-(trifluoromethyl)cyclopropyl]methyl}-1h-imidazol-2-yl)propan-2-ol	1	0.961308	0.999893	1	0.999476	1	0.615704	0.999286	1	1	1	0.999033	1	1	0.999642
(2s)-2-((s)-2-((2r,3s)-3-amino-6-(biphenyl-4-yl)-2-hydroxyhexylamino)-3-methylbutanamido)-4-methyl-n-(3-phenylpropyl)hexanamide	0.003594	0	0	0	0.068204	0	0	0	0	0	0	0.000672	0	0	0.001422
(3-amino-2-hydroxy-propyl)-methyl-phosphinic acid	0.094117	0.64007	0.150908	0	0.00122	0	0.477704	0	0	0	0.1	0.030012	0	0	0.091679
(3-aminomethyl-7-chloro-quinolin-4-yl)-butyl-amine	0.000204	0.724958	1e-06	0	0.022945	0	0.166177	0.001508	0	0	0	0.00245	0	0	0.000885
(3-hydroxy-4-methoxy-phenyl)-(3,4,5-trimethoxy-phenyl)-methanone	0.776773	0.025956	0.997966	1	1	1	0.396082	0.999286	1	1	0.8	0.997541	1	1	0.924093
(3,4-dichloro-phenyl)-(3-phenyl-5,6-dihydro-4h-pyridazin-1-yl)-methanone	0.284095	0.983829	0.325649	0	0.308284	0.001195	0.650323	0.002358	0.001195	0	0.1	0.503038	0.001195	1	0.370927
(3,4-dihydro-2h-pyrano[2,3-b]quinolin-7-yl)(cis-4-methoxycyclohexyl)-methanone	1	0.999998	1	1	0.98103	1	0.996005	0.999264	1	1	1	0.999903	1	1	0.999968
(3,5-di-tert-butyl-4-hydroxy-phenyl)-thiophen-2-yl-methanone	0.76441	0.475381	0.940131	1	0.00122	0	0.344183	0	0	0	0	0.399194	0	0	0.701245
(3r,4r)-3-amino-tricyclo[2.2.1.0*2,6*]heptane-1,3-dicarboxylic acid	0.993174	1	0.999476	1	0.989434	1	0.553375	1	1	1	1	1	1	1	0.99755
(3r,4s,5s,6r)-5-methoxy-4-((2r,3r)-2-methyl-3-(3-methylbut-2-enyl)oxiran-2-yl)-1-oxaspiro[2.5]octan-6-yl 2-chloroacetylcarbamate	0.867287	0.03422	0.997868	1	1	1	0.340882	0.999286	1	1	1	0.997541	1	1	0.954232
(3s,3ar)-2-(3-chloro-4-cyanophenyl)-3-cyclopentyl-3,3a,4,5-tetrahydro-2h-benzo[g]indazole-7-carboxylic acid	0.96556	0.982453	0.970785	1	1	1	0.640977	0.999286	1	1	0.9	0.899476	1	1	0.945274
(3s,5s,6s,8s,10s,13s,14s,17s)-6-((2r,3r,4s,5r,6r)-3,5-dihydroxy-4-((2s,3r,4s,5r)-4-hydroxy-5-((2s,3r,4s,5s,6r)-4-hydroxy-6-methyl-3-((2s,3r,4s,5r,6r)-3,4,5-trihydroxy-6-methyl-tetrahydro-2h-pyran-2-yloxy)-5-((2s,3r,4s,5s)-3,4,5-trihydroxy-tetrahydro-2h-pyran-2-yloxy)-tetrahydro-2h-pyran-2-yloxy)-3-((2s,3r,4s,5s,6r)-3,4,5-trihydroxy-6-methyl-tetrahydro-2h-pyran-2-yloxy)-tetrahydro-2h-pyran-2-yloxy…	0.007523	0.297127	0.004096	0	0.062181	0	0.639917	0	0	0	0	0.001458	0	0	0.004359
(3s,6r)-1-(6-(3-amino-1h-indazol-6-yl)-2-(methylamino)pyrimidin-4-yl)-n-cyclohexyl-6-methylpiperidine-3-carboxamide	0.127963	0.875624	8e-05	0	0.00122	0	0.570268	0	0	0	0	0.003243	0	0	0.043762
(3s,8r,9s,10r,13s,14s,17s)-10,13-dimethyl-2,3,4,7,8,9,10,11,12,13,14,15,16,17-tetradecahydro-1h-cyclopenta[a]phenanthrene-3,17-diol	0.110173	0.944389	0.002214	0	0.236095	0	0.678726	0	0	0	0	0.003059	0	0	0.038482
(3s,8s,9r,z)-8,9,16-trihydroxy-14-methoxy-3-methyl-3,4,9,10,11,12-hexahydro-1h-benzo[c][1]oxacyclotetradecine-1,7(8h)-dione	1	0.964864	0.999786	1	0.999476	1	0.612807	0.999286	1	1	1	0.999033	1	1	0.999606
(4-{3-[4-(imino-methoxycarbonylamino-methyl)-phenyl]-2-oxo-oxazolidin-5-ylmethyl}-piperazin-1-yl)-acetic acid ethyl ester(emd-122347)	0.267014	0.390817	0.000325	0	0.00122	0	0.354598	0	0	0	0	0.003654	0	0	0.090331
(4-butoxy-1h-pyrazolo[3,4-b]pyridin-5-yl)-phenyl-methanone	0.007154	0.197013	0.00011	0	0.001865	0	0.566998	0	0	0	0	0.0013	0	0	0.002855
(4-chlorophenyl)-(4-isoquinolin-5-yl-phthalazin-1-yl)amine	0.998955	0.995506	1	1	0.992241	1	0.79313	1	1	1	1	0.999441	1	1	0.999465
(4-isopropyl-phenyl)-carbamic acid 1,3a,8-trimethyl-1,2,3,3a,8,8a-hexahydro-pyrrolo[2,3-b]indol-5-yl ester	0.998421	0.496189	1	1	0.898819	1	0.569506	0.999265	1	1	1	0.998592	1	1	0.999004
(4,5-bis(4-methoxyphenyl)thiazol-2-yl)(4-methylpiperazin-1-yl)methanone	0.012883	0.894923	0.009021	0	0.00122	0	0.49062	0	0	0	0	0.001633	0	0	0.007846
(4ar,6ar,7r,10s)-7-(1,5-dimethyl-hexyl)-1,4a,6a,10-tetramethyl-hexadecahydro-indeno[5,4-f]quinolin-2-one	0.680447	0.04891	0.997011	1	1	1	0.30899	0.999286	1	1	1	0.997541	1	1	0.891666
(4as,6as,6br,8ar,10s,12ar,12br,14bs)-10-hydroxy-2,2,6a,6b,9,9,12a-heptamethyl-1,2,3,4,4a,5,6,6a,6b,7,8,8a,9,10,11,12,12a,12b,13,14b-icosahydropicene-4a-carboxylic acid	0.012185	0.647832	0.001534	0	0.156971	0.018868	0.470267	0	0	0	0	0.0013	0.018868	0	0.005006
(4r,7r,10s,13s,16s,19s,22s,25s,28s,31s,34s,37r)-37-{2-[(2s)-2-[(2s)-6-amino-2-[(2s)-2-[(2s)-2-[(2s)-2-{[(2s)-1-[(2s)-2-[(2s)-2-[(2s)-2-{[(2s)-1-[(2r)-2-[(2s)-2-[(2s)-2-[(2s)-2-[(2s)-2-amino-3-hydroxypropanamido]propanamido]-3-carbamoylpropanamido]-3-hydroxypropanamido]-3-carbamoylpropanoyl]pyrrolidin-2-yl]formamido}propanamido]-4-(methylsulfanyl)butanamido]propanoyl]pyrrolidin-2-yl]formamido}-5-c…	1	0.970614	0.999954	1	0.965287	1	0.647478	1	1	1	1	0.999088	1	1	0.999681
(4s,5r)-nutlin-3	0.032158	0.078302	7.5e-05	0	0.051587	0.013889	0.285308	0.020408	0.017143	0	0	0.003654	0.013889	0	0.011962
(4s,7r,13r)-13-[(s)-2-amino-3-(4-hydroxy-phenyl)-propionylamino]-7-benzyl-3,3,14,14-tetramethyl-6,9,12-trioxo-1,2-dithia-5,8,11-triaza-cyclotetradecane-4-carboxylic acid	1	0.999996	0.999538	1	0.982173	1	0.999627	0.99917	1	1	1	0.999809	1	1	0.999782
(5-amino-3-((4'-((8-amino-1-hydroxy-3,6-disulfo-2-naphthyl)diazenyl)-3,3'-dimethoxy[1,1'-biphenyl]-4-yl)diazenyl)-4-hydroxy-2,7-naphthalenedisulfonicacid	0.985284	0.998616	0.997075	1	0.672157	0	0.899048	0.997619	1	1	0.8	0.898713	0	1	0.960358
(5-oxo-5,11-dihydro-10-thia-dibenzo[a,d]cyclohepten-8-yl)-acetic acid	0.905185	0.026104	0.997963	1	1	1	0.380321	0.999286	1	1	1	0.997541	1	1	0.966896
(5h,11h-benzo[e]pyrrolo[1,2-a][1,4]diazepin-10-yl)-[2-chloro-4-(3-methyl-pyrazol-1-yl)-phenyl]-methanone	1	0.952211	0.999877	1	0.999476	1	0.574066	0.999286	1	1	1	0.999033	1	1	0.999637
(5r,6r)-2,2-dimethyl-6-[1,2,4]triazol-1-ylmethyl-5-(4-trifluoromethoxy-phenoxymethyl)-cyclohexanone o-methyl-oxime	6.4e-05	0.04702	2.7e-05	0	0.039259	0	0.176322	0	0	0	0	0.000388	0	0	0.00016
(5r,6r)-2,2-dimethyl-6-[1,2,4]triazol-1-ylmethyl-5-(4-trifluoromethoxy-phenoxymethyl)-cyclohexanone oxime	6.4e-05	0.04702	2.7e-05	0	0.039259	0	0.176322	0	0	0	0	0.000388	0	0	0.00016
(5r,6r)-5-[2-(4-ethyl-phenyl)-ethyl]-2,2-dimethyl-6-[1,2,4]triazol-1-ylmethyl-cyclohexanone oxime	6.4e-05	0.04702	2.7e-05	0	0.039259	0	0.176322	0	0	0	0	0.000388	0	0	0.00016
(5s,11r,14s)-14-amino-5-benzyl-15-(4-hydroxyphenyl)-6,11-dimethyl-4,7,10,13-tetraoxo-3,6,9,12-tetraazapentadecan-1-oic acid	1	0.983954	0.999984	1	0.954298	1	0.673481	0.999263	1	1	1	0.999275	1	1	0.999753
(5s,8s,10ar)-n-benzhydryl-5-((s)-2-(methylamino)propanamido)-6-oxo-3-(2-phenylacetyl)decahydropyrrolo[1,2-a][1,5]diazocine-8-carboxamide	0.038761	0.928178	7.9e-05	0	0.00122	0	0.659839	0	0	0	0	0.001616	0	0	0.013485
(5z)-2-amino-5-[(1,3-benzodioxol-5-yl)methylene]-3-methyl-3,5-dihydro-4h-imidazol-4-one	0.990682	0.887322	0.866627	1	0.5	0	0.468687	0.999286	0	0	0.2	0.200711	0	1	0.686007
(6-{2-[(e)-benzhydryloxyimino]-pentyl}-5,6,7,8-tetrahydro-naphthalen-1-yloxy)-acetic acid	1	0.939079	0.999847	1	0.999476	1	0.504894	0.999286	1	1	1	0.999033	1	1	0.999627
(6-amino-1-hydroxy-1-phosphono-hexyl)-phosphonic acid	0.996275	1	0.999894	1	0.988234	1	0.368478	0.996329	1	1	1	0.999552	1	1	0.998573
(6-iodo-2-methyl-1-(2-morpholinoethyl)-1h-indol-3-yl)(4-methoxyphenyl)methanone	1	0.944392	0.999868	1	0.999476	1	0.535262	0.999286	1	1	1	0.999033	1	1	0.999634
(6r,7s)-6,7-bis(4-bromophenyl)-2,12-dimethyl-7,12-dihydro-6h-chromeno[4,3-d][1,2,4]triazolo[1,5-a]pyrimidine	0.247458	0.557325	0.993378	0	0.00122	0	0.327298	0	0	0	0	0.203187	0	1	0.481341
(7r,9as)-7-(4-fluoro-phenoxymethyl)-2-(5-fluoro-pyrimidin-2-yl)-octahydro-pyrido[1,2-a]pyrazine	1	0.98119	0.999985	1	0.958317	1	0.60901	1	1	1	1	0.999253	1	1	0.999746
(8s,11r,13r,14s,17s)-11-(4-acetyl-phenyl)-17-hydroxy-17-(3-hydroxy-propyl)-13-methyl-1,2,6,7,8,11,12,13,14,15,16,17-dodecahydro-cyclopenta[a]phenanthren-3-one	0.022649	0.925512	0.000223	0	0.00122	0	0.568011	0	0	0	0	0.10115	0	0	0.041341
(8s)-7,8-dihydro-7-oxo-tingenone	0.905185	0.026104	0.997963	1	1	1	0.380321	0.999286	1	1	1	0.997541	1	1	0.966896
(ci-914)6-(4-imidazol-1-yl-phenyl)-4,5-dihydro-2h-pyridazin-3-one	0.882959	0.204802	0.997649	1	1	1	0.342552	0.999286	1	1	1	0.608268	1	1	0.829625
(ci-930)6-(4-imidazol-1-yl-phenyl)-5-methyl-5,6-dihydro-4h-pyridazin-3-one	0.882959	0.204802	0.997649	1	1	1	0.342552	0.999286	1	1	1	0.608268	1	1	0.829625
(e)-(12s,13r,14s,17r,21s,23s,24r,25r,27r)-17-ethyl-14-hydroxy-12-[(e)-2-((1r,3r,4r)-4-hydroxy-3-methoxy-cyclohexyl)-1-methyl-vinyl]-23,25-dimethoxy-13,19,21,27-tetramethyl-11,28-dioxa-4-aza-tricyclo[22.3.1.0*4,9*]octacos-18-ene-2,3,10,16-tetraone	0.646545	0.69863	0.998165	1	0.573173	0	0.261437	1	0	0	0.4	0.498584	0	1	0.714431
(e)-(1r,2r,3r,5r,12s,13r,16s)-16-hydroxymethyl-5,9,12,13-tetramethyl-4-oxa-tricyclo[10.3.1.0*3,5*]hexadec-8-en-2-ol	1	0.999991	0.998177	1	0.996214	1	0.991901	1	1	1	1	0.999498	1	1	0.999225
(e)-(3s,6r,10r,16s)-10-(3-chloro-4-methoxy-benzyl)-3-isobutyl-6-methyl-16-[(s)-1-((2r,3r)-3-phenyl-oxiranyl)-ethyl]-1,4-dioxa-8,11-diaza-cyclohexadec-13-ene-2,5,9,12-tetraone	0.521311	1	2.1e-05	0	0.495588	0.018868	0.546418	0.076923	1	0	0.6	0.600118	0.018868	0	0.373817
(e)-1-(2-hydroxy-4,6-dimethoxyphenyl)-3-(4-methoxyphenyl)prop-2-en-1-one	0.503024	0.227236	0.007898	0	0.197354	0	0.577951	0	0	0	0	0.099646	0	0	0.203523
(e)-1-(2,4-dimethoxy-phenyl)-3-(4-methoxy-phenyl)-propenone	0.02376	0.704952	0.000292	0	0.00122	0	0.499083	0	0	0	0	0.001861	0	0	0.008638
(e)-2-(3,4-dihydroxy-benzoyl)-3-(3,4-dihydroxy-phenyl)-acrylonitrile	1	0.98953	0.999933	1	0.999476	1	0.721121	0.999286	1	1	1	0.999033	1	1	0.999655
(e)-3-(3,4-dihydroxy-phenyl)-acrylic acid (r)-1-carboxy-2-(3,4-dihydroxy-phenyl)-ethyl ester	0.036622	0.660607	0.26307	0	0.274652	0	0.675197	0.001529	0	0	0	0.003757	0	1	0.10115
(e)-3-[6-(2,6-dichloro-phenylsulfanylmethyl)-3-phenethyloxy-pyridin-2-yl]-acrylic acid	1	0.999973	0.999521	1	0.90677	1	0.771498	1	1	1	1	0.999547	1	1	0.999689
(e)-4-(4-((2-oxoindolin-3-ylidene)methyl)phenyl)piperazine-1-carbaldehyde	0.99999	0.992855	0.999969	1	0.999476	1	0.769782	0.999286	1	1	1	0.999033	1	1	0.999664
(e)-4-styrylaniline	0.889857	0.998411	0.999998	1	0.819621	0.996855	0.46091	1	0.996933	1	1	0.999072	0.996855	1	0.962976
(e)-6-styrylisatin	0.889857	0.998411	0.999998	1	0.819621	0.996855	0.46091	1	0.996933	1	1	0.999072	0.996855	1	0.962976
(e)-n-(3''-phenylpropyl)-alpha-cyano-3',5'-diisopropyl-4'-hydroxycinnamamide	0.998955	0.995506	1	1	0.992241	1	0.79313	1	1	1	1	0.999441	1	1	0.999465
(gaba) 3-carboxy-propyl-ammonium	0.008735	0.121252	0.001832	0	0	0	0.203572	0	0	0	0	0.003654	0	0	0.00474
(l-707-587) 17-ethyl-1,14,20-trihydroxy-23,25-dimethoxy-12-{2-[3-methoxy-4-(1-methyl-1h-indol-5-yloxy)-cyclohexyl]-1-methyl-vinyl}-13,19,21,27-tetramethyl-11,28-dioxa-4-aza-tricyclo[22.3.1.0*4,9*]octacos-18-ene-2,3,10,16-tetraone	0.101805	0.194616	0.001071	0	0.162677	0	0.324912	0.125	0	0	0.1	0.199438	0	0	0.100771
(l)-1-methyltryptophan	0.201789	0.100888	0.001143	0	0	0	0.135976	0	0	0	0	0.002044	0	0	0.068325
(l685,818) 17-ethyl-1,14,20-trihydroxy-12-[2-(4-hydroxy-3-methoxy-cyclohexyl)-1-methyl-vinyl]-23,25-dimethoxy-13,19,21,27-tetramethyl-11,28-dioxa-4-aza-tricyclo[22.3.1.0*4,9*]octacos-18-ene-2,3,10,16-tetraone	0.101805	0.194616	0.001071	0	0.162677	0	0.324912	0.125	0	0	0.1	0.199438	0	0	0.100771
(l732,531)17-ethyl-1,14-dihydroxy-12-(2-{4-[1-(2-hydroxy-ethyl)-1h-indol-5-yloxy]-3-methoxy-cyclohexyl}-1-methyl-vinyl)-23,25-dimethoxy-13,19,21,27-tetramethyl-11,28-dioxa-4-aza-tricyclo[22.3.1.0*4,9*]octacos-18-ene-2,3,10,16-tetraone	0.027035	0.071833	3.5e-05	0	0.027366	0.002548	0.241718	0	0	0	0	0.000993	0.002548	0	0.009355
(n-(3-ethoxy-phenyl)-4-pyrrolidin-1-yl-3-trifluoromethyl-benzamide	1	0.964028	0.999908	1	0.999476	1	0.62843	0.999286	1	1	1	0.999033	1	1	0.999647
(r-5135) 3-hydroxy-16-imino-10,13-dimethyl-11-oxo-hexadecahydro-17-azonia-cyclopenta[a]phenanthrene	0.008155	0.097849	0.000224	0	0	0	0.155097	0	0	0	0	0.003243	0	0	0.003874
(r,z)-5-(2,6-dichlorobenzylsulfonyl)-3-((3,5-dimethyl-4-(2-(pyrrolidin-1-ylmethyl)pyrrolidine-1-carbonyl)-1h-pyrrol-2-yl)methylene)indolin-2-one	0.999995	0.990456	0.99996	1	0.999476	1	0.735001	0.999286	1	1	1	0.999033	1	1	0.999663
(r)-(+)-n-{3-[5-(4-fluorophenoxy)furan-2-yl]-1-methylprop-2-ynyl}-n-hydroxyurea	0.857805	0.237391	0.892536	1	0.928571	1	0.011109	1	1	1	1	0.996546	1	1	0.915629
(r)-1-(1h-indazol-4-yl)-3-(5-(piperidin-1-yl)-2,3-dihydro-1h-inden-1-yl)urea	0.086252	0.92658	5.2e-05	0	0.145783	0	0.724697	0.013699	0	0	0	0.002038	0	0	0.029447
(r)-1-(2-(2-(4-(4-fluorobenzyl)-2-methylpiperazin-1-yl)-2-oxoethoxy)-5-chlorophenyl)urea	1	0.969128	0.999853	1	0.999476	1	0.660313	0.999286	1	1	1	0.999033	1	1	0.999629
(r)-1-(2-(2-ethoxyphenyl)-1-phenylethyl)piperazine	0.00023	0.089832	2.3e-05	0	0.03229	0	0.269491	0	0	0	0	0.0013	0	0	0.000517
(r)-1-(2-chlorophenyl)-6-(3,3,3-trifluoro-2-methylpropyl)-1h-pyrazolo[3,4-d]pyrimidine-4(5h)-one	0.97248	0.080932	0.851396	1	1	1	0.137506	0.999286	1	1	1	0.576749	1	1	0.800208
(r)-1-(4-(1h-indazol-5-yl)piperazin-1-yl)-2-amino-2-phenylethanone	0.001372	0.759059	9.4e-05	0	0.00122	0	0.467654	0	0	0	0	0.003654	0	0	0.001706
(r)-1-(4-(1h-indazol-5-yl)piperazin-1-yl)-2-amino-3-phenylpropan-1-one	0.001372	0.759059	9.4e-05	0	0.00122	0	0.467654	0	0	0	0	0.003654	0	0	0.001706
(r)-1-(4-(1h-indazol-5-yl)piperazin-1-yl)-2-hydroxy-2-phenylethanone	0.001372	0.759059	9.4e-05	0	0.00122	0	0.467654	0	0	0	0	0.003654	0	0	0.001706
(r)-1-{2-[4-(4-chloro-benzenesulfonylaminocarbonyl)-benzoylamino]-3-methyl-butyryl}-pyrrolidine-2-carboxylic acid (3,3,3-trifluoro-1-isopropyl-2-oxo-propyl)-amide	0.053338	0.29437	8.2e-05	0	0.00122	0	0.26678	0	0	0	0	0.003654	0	0	0.019024
(r)-1-methoxy-3-((3s,4r,5r)-4-(4-(3-(2-methoxybenzyloxy)propoxy)phenyl)-5-((4-methoxynaphthalen-2-yl)methoxy)piperidin-3-yloxy)propan-2-ol	0.002072	0	2.1e-05	0	0.080865	0	0	0	0	0	0	0.000581	0	0	0.000891
(r)-2-((r)-3-amino-3-(4-((2-methylquinolin-4-yl)methoxy)phenyl)-2-oxopyrrolidin-1-yl)-n-hydroxy-4-methylpentanamide	0.814271	0.931928	0.023835	0	0.5	0	0.562091	0.999286	0	0	0	0.401996	0	1	0.413367
(r)-2-(3-benzoylphenyl)propanoic acid	0.077837	0.552791	0.000558	0	0.001865	0	0.700623	0	0	0	0	0.000598	0	0	0.026331
(r)-2-(7-(4-fluoro-n-methylphenylsulfonamido)-6,7,8,9-tetrahydropyrido[1,2-a]indol-10-yl)acetic acid	0.000188	0.453607	6.3e-05	0	0.00122	0	0.349035	0	0	0	0	0.003654	0	0	0.001302
(r)-2-(sec-butylamino)-n-(2-methyl-5-(methylcarbamoyl)phenyl)thiazole-5-carboxamide	0.999307	0.938705	0.999186	1	0.966712	1	0.566869	1	1	1	1	0.999213	1	1	0.999235
(r)-2-[(s)-1-((s)-3-methyl-1-phenylcarbamoyl-butylcarbamoyl)-3-phenyl-propylamino]-propionic acid	0.999569	0.970649	0.99988	1	0.971491	1	0.473354	0.999123	0.991379	1	1	0.995953	1	1	0.998467
(r)-2-bromo-4,5-dimethoxy-n-(3-(1-methylpyrrolidin-3-yloxy)-4-(trifluoromethyl)phenyl)benzenesulfonamide	1	0.937955	0.999861	1	0.999476	1	0.512073	0.999286	1	1	1	0.999033	1	1	0.999631
(r)-2-chloro-6-(2-hydroxy-3-(2-methyl-1-(naphthalen-2-yl)propan-2-ylamino)propoxy)benzonitrile	0.008147	0.232864	0.000545	0	0.002994	0	0.309807	0	0	0	0	0.003654	0	0	0.004115
(r)-2-methoxy-5-[4-(2-piperidin-1-yl-ethoxy)-phenyl]-11,12-dihydro-5h-6,13-dioxa-benzo[3,4]cyclohepta[1,2-a]naphthalen-8-ol	0.59934	0.956461	0.048212	0	0.009202	0	0.815842	0	0	0	0	0.00679	0	0	0.218114
(r)-2-methyl-3-phenethyl-5-phenyl-2,5-dihydro-1h-benzo[e][1,3]diazepine	0.976243	0.983175	0.98366	1	1	1	0.645515	0.999286	1	1	1	0.899476	1	1	0.953126
(r)-2,4,6-trimethyl-deca-2,4-dienoic acid {(1s,5s,6r)-5-hydroxy-5-[(1e,3e,5e)-6-(2-hydroxy-5-oxo-cyclopent-1-enylcarbamoyl)-hexa-1,3,5-trienyl]-2-oxo-7-oxa-bicyclo[4.1.0]hept-3-en-3-yl}-amide	0.024538	0.107853	7.4e-05	0	0.051587	0.013889	0.375641	0.020408	0.017143	0	0	0.0021	0.013889	0	0.008904
(r)-3-((3s,4r,5r)-4-(4-(3-(2-methoxybenzyloxy)propoxy)phenyl)-5-((4-methoxynaphthalen-2-yl)methoxy)piperidin-3-yloxy)propane-1,2-diol	0.002072	0	2.1e-05	0	0.080865	0	0	0	0	0	0	0.000581	0	0	0.000891
(r)-3-(4-cyano-3-(3-(1-(2,3-dihydro-1h-inden-2-yl)-2-methylpropan-2-ylamino)-2-hydroxypropoxy)phenyl)propanoic acid	0.988347	0.991811	0.039957	1	0.094513	0	0.66305	1	0	0	0.2	0.698837	0	0	0.575714
(r)-3-[(s)-1-((s)-2-methoxy-1-phenyl-ethylcarbamoyl)-2,2-dimethyl-propylcarbamoyl]-6-(2-methyl-biphenyl-4-yl)-hexanoic acid	0.99953	0.420567	0.999719	1	1	1	0.461699	0.999286	1	1	1	0.895262	1	1	0.964837
(r)-3-ethyl-5-(5-(4-ethylpiperazin-1-ylsulfonyl)-2-(1-methoxypropan-2-yloxy)pyridin-3-yl)-2-methyl-2h-pyrazolo[4,3-d]pyrimidin-7(6h)-one	0.903533	0.406634	0.860134	1	0.986601	1	0.040021	0.108108	0.002364	1	0.3	0.798642	1	1	0.854103
(r)-4-(1-aminoethyl)-n-(1h-pyrrolo[2,3-b]pyridin-4-yl)benzamide	0.998519	0.999969	0.999999	1	0.981444	1	0.83276	0.997744	1	1	1	0.999581	1	1	0.999366
(r)-5-(6-cyclohexyl-1-(hydroxyamino)-1-oxohexan-3-yl)-1,2,4-oxadiazole-3-carboxamide	0.666178	0.281184	0.970919	1	0.903953	1	0.461146	1	1	0	0.6	0.300936	1	1	0.646011
(r)-7-oxo-n-(quinuclidin-3-yl)-4,7-dihydrothieno[3,2-b]pyridine-6-carboxamide	4.2e-05	1e-06	7e-06	0	0.011834	0	0	0	0	0	0	0.000968	0	0	0.000339
(r)-n-(2-methoxyphenethyl)-4-((diethylamino)methyl)-n-(pyrrolidin-3-yl)benzamide	0.999319	0.628892	0.999998	1	1	1	0.449776	0.999286	1	1	1	0.995027	1	1	0.998115
(r)-n-(4-benzoyl-phenyl)-3,3,3-trifluoro-2-hydroxy-2-methyl-propionamide	0.112708	0.071587	6.6e-05	0	0.051587	0.013889	0.30566	0.020408	0.017143	0	0	0.005577	0.013889	0	0.03945
(r)-n*1*-[2,2-dimethyl-1-((r)-methylcarbamoyl)-propyl]-n*4*-hydroxy-2-isobutyl-succinamide	0.999584	0.530103	0.999954	1	0.993189	1	0.656226	1	1	1	1	0.998221	1	1	0.999253
(r)-norduloxetine	0.987061	0.081311	0.969615	1	1	1	0.136223	0.999286	1	1	1	0.996794	1	1	0.98449
(r)-sargachromenol	0.013287	0.763129	0.036814	0	0.00262	0.002169	0.182547	0.004808	0.002169	0	0	0.002958	0.002169	0	0.017686
(rs)-{4-[5-(4-fluorophenyl)-2-methylsulfanyl-3h-imidazol-4-yl]pyridin-2-yl}-(1-phenylethyl)amine]	0.998594	0.914942	0.982896	1	0.999476	1	0.508371	0.999286	1	1	1	0.679398	1	1	0.886963
(s,s,s) 2-[2-(1-ethoxycarbonyl-3-phenyl-propylamino)-propionyl]-1,2,3,4-tetrahydro-isoquinoline-3-carboxylic acid	0.995041	1	0.996845	1	0.970576	1	0.400047	0.999287	1	1	1	0.998554	1	1	0.996813
(s,s,s)-1-[2-(1-carboxy-3-phenyl-propylamino)-propionyl]-octahydro-indole-2-carboxylic acid	0.010609	0	2e-06	0	0.04703	0.005076	0	0.005	0.004566	0	0	0.00072	0.005076	0	0.003777
(s)-((s)-2-aminopropyl) 6-amino-2-(2-(2-(naphthalen-2-yl)-1h-benzo[g]indol-3-yl)acetamido)hexanoate	1	0.966666	0.999876	1	0.999476	1	0.643966	0.999286	1	1	1	0.999033	1	1	0.999636
(s)-(+)-3-{2-[(3-cyclopropyloxy-4-difluromethoxy)-phenyl]-2-[5-(2-(1-hydroxy-1-trifluoromethyl-2,2,2-trifluoro)ethyl)-thiazolyl]ethyl}pyridine n-oxide	0.145502	0.075649	0.017503	0	0.017182	0	0.013901	0	0	0	0.1	0.499914	0	0	0.220973
(s)-(4-(1h-indazol-5-yl)piperazin-1-yl)(1,2,3,4-tetrahydroisoquinolin-3-yl)methanone	0.001324	0.45392	2.7e-05	0	0.03229	0	0.466185	0	0	0	0	0.0013	0	0	0.000883
(s)-1-((r)-2-methanesulfonylamino-3-phenyl-propionyl)-pyrrolidine-2-carboxylic acid (1-carbamimidoyl-piperidin-4-ylmethyl)-amide	0.999935	0.99999	0.999539	1	0.97412	1	0.974446	0.999238	1	1	1	0.997747	1	1	0.999074
(s)-1-((r)-2-methylamino-3-phenyl-propionyl)-pyrrolidine-2-carboxylic acid (4-amino-cyclohexylmethyl)-amide	0.999935	0.99999	0.999539	1	0.97412	1	0.974446	0.999238	1	1	1	0.997747	1	1	0.999074
(s)-1-((r)-2-methylamino-3-phenyl-propionyl)-pyrrolidine-2-carboxylic acid [(s)-1-(benzothiazole-2-carbonyl)-4-guanidino-butyl]-amide	0.037105	0.999924	0.005097	0	0.110053	0.008746	0.888787	0.011905	0.008746	0	0	0.006046	0.008746	0	0.016083
(s)-1-(1h-indol-3-yl)-3-(5-(3-methyl-1h-indazol-5-yl)pyridin-3-yloxy)propan-2-amine	1	0.982874	0.999904	1	0.999476	1	0.711911	0.999286	1	1	1	0.999033	1	1	0.999646
(s)-1-(4-(1h-indazol-5-ylamino)piperidin-1-yl)-2-(2-chlorophenyl)-2-hydroxyethanone	0.001372	0.759059	9.4e-05	0	0.00122	0	0.467654	0	0	0	0	0.003654	0	0	0.001706
(s)-1-(4-(1h-indazol-5-ylamino)piperidin-1-yl)-2-amino-3-phenylpropan-1-one	0.001372	0.759059	9.4e-05	0	0.00122	0	0.467654	0	0	0	0	0.003654	0	0	0.001706
(s)-1-(4-dimethylamino-3-methyl-benzyl)-5-diphenylacetyl-4,5,6,7-tetrahydro-1h-imidazo[4,5-c]pyridine-6-carboxylic acid	1	0.999998	0.999723	1	0.938197	1	1	1	1	1	1	0.999901	1	1	0.999875
(s)-1-[(3as,7as)-4-hydroxy-4-(2-methoxy-phenyl)-7,7-diphenyl-octahydro-isoindol-2-yl]-2-(2-methoxy-phenyl)-propan-1-one	1	0.999964	0.999574	1	0.990402	1	0.959188	1	1	1	1	0.999759	1	1	0.999778
(s)-1-[(s)-3-hydroxy-2-(naphthalene-2-sulfonylamino)-propionyl]-pyrrolidine-2-carboxylic acid (4-guanidino-butyl)-amide	0.999935	0.99999	0.999539	1	0.97412	1	0.974446	0.999238	1	1	1	0.997747	1	1	0.999074
(s)-1-{(s)-2-[(s)-3-carboxy-2-((s)-4-methyl-2-{2-[4-(3-o-tolyl-ureido)-phenyl]-acetylamino}-pentanoylamino)-propionylamino]-3-methyl-butyryl}-pyrrolidine-2-carboxylic acid	0.134939	0.330383	0.000284	0	0.00122	0	0.310817	0	0	0	0	0.003654	0	0	0.046292
(s)-1-{2-[tris-(4-methoxy-phenyl)-methoxy]-ethyl}-piperidine-3-carboxylic acid	0.987061	0.081311	0.969615	1	1	1	0.136223	0.999286	1	1	1	0.996794	1	1	0.98449
(s)-10-amino-4-ethyl-4-hydroxy-1,12-dihydro-4h-2-oxa-6,12a-diaza-dibenzo[b,h]fluorene-3,13-dione	0.998968	0.925938	1	1	1	1	0.765585	0.999298	1	1	1	0.996895	1	1	0.998621
(s)-2-((s)-6-amino-2-{(2r,5s)-5-[(s)-2-((s)-2-tert-butoxycarbonylamino-3-phenyl-propionylamino)-3-(1h-imidazol-4-yl)-propionylamino]-6-cyclohexyl-4-hydroxy-2-isobutyl-hexanoylamino}-hexanoylamino)-3-phenyl-propionic acid	0.001024	0	0	0	0.030387	0	0	0	0	0	0	0.000424	0	0	0.000483
(s)-2-(2-benzoylphenylamino)-3-(4-(2-(5-methyl-2-phenyloxazol-4-yl)ethoxy)phenyl)propanoic acid	0.005726	0.102552	0.001566	0	0.002994	0	0.137391	0	0	0	0	0.003243	0	0	0.003512
(s)-2-(2,6-dichloro-benzoylamino)-3-(2',6'-dimethoxy-biphenyl-4-yl)-propionic acid	0.121076	0.320367	0.000295	0	0.00122	0	0.304357	0	0	0	0	0.003654	0	0	0.041675
(s)-2-(4-(((2-amino-4-oxo-1,4-dihydroquinazolin-6-yl)methyl)(prop-2-ynyl)amino)benzamido)pentanedioic acid	0.991799	1	1	1	0.972677	0.995074	0.194858	0.999284	0.995074	1	1	1	0.995074	1	0.997266
(s)-2-[(s)-2-((r)-2-hydroxycarbamoylmethyl-4-methyl-pentanoylamino)-4-methyl-pentanoylamino]-propionic acid ethyl ester	0.998934	0.969613	0.999995	1	0.974505	0.989011	0.603369	0.999206	1	1	1	0.989785	0.989011	1	0.996238
(s)-2-[4-(2-benzenesulfonyl-ethoxy)-3-methoxy-5-(propane-1-sulfonyl)-phenyl]-5-(3,4,5-trimethoxy-phenyl)-tetrahydro-furan	1	0.999991	0.998177	1	0.996214	1	0.991901	1	1	1	1	0.999498	1	1	0.999225
(s)-2-{(r)-4-[2-(2-amino-4-oxo-3,4,5,6,7,8-hexahydro-pyrido[2,3-d]pyrimidin-6-yl)-ethyl]-benzoylamino}-pentanedioic acid	0.998573	0.783039	0.999998	1	1	1	0.497853	0.999286	1	1	1	0.995027	1	1	0.997866
(s)-2-{(s)-1-{3-[(e)-2-(7-chloro-quinolin-2-yl)-vinyl]-phenyl}-3-[2-(1-hydroxy-1-methyl-ethyl)-phenyl]-propylsulfanylmethyl}-pentanoic acid	1	0.999673	0.999911	1	0.937133	0.999036	0.995933	1	0.999036	1	1	0.999808	0.999036	1	0.999906
(s)-2-{[6-((r)-2-amino-3-mercapto-propylamino)-naphthalene-1-carbonyl]-amino}-4-methylsulfanyl-butyric acid	0.024538	0.107853	7.4e-05	0	0.051587	0.013889	0.375641	0.020408	0.017143	0	0	0.0021	0.013889	0	0.008904
(s)-2-{[6-((r)-2-amino-3-mercapto-propylamino)-naphthalene-1-carbonyl]-amino}-4-methylsulfanyl-butyric acid methyl ester	0.024538	0.107853	7.4e-05	0	0.051587	0.013889	0.375641	0.020408	0.017143	0	0	0.0021	0.013889	0	0.008904
(s)-2-acetylamino-3-(1h-indol-3-yl)-propionic acid 3,5-bis-trifluoromethyl-benzyl ester	1	0.999964	0.999574	1	0.990402	1	0.959188	1	1	1	1	0.999759	1	1	0.999778
(s)-2-acetylamino-3-(1h-indol-3-yl)-propionic acid 3,5-dimethyl-benzyl ester	1	0.999964	0.999574	1	0.990402	1	0.959188	1	1	1	1	0.999759	1	1	0.999778
(s)-2-benzenesulfonylamino-3-(4-piperazin-1-yl-benzoylamino)-propionic acid	0.267014	0.390817	0.000325	0	0.00122	0	0.354598	0	0	0	0	0.003654	0	0	0.090331
(s)-3-((r,z)-4-(((1s,2r,4ar,6r,8s,8ar)-2-((e)-but-2-en-2-yl)-6,8-dimethyl-decahydronaphthalen-1-yl)(hydroxy)methylene)-3,5-dioxopyrrolidin-2-yl)-2-hydroxy-2-methylpropanoic acid	1	0.975092	0.999891	1	0.975161	1	0.641932	1	1	1	1	0.999449	1	1	0.99978
(s)-3-(4-(2-(4-(2-(2-chlorophenyl)-2-hydroxyethylamino)-2-oxo-1,2-dihydropyridin-3-yl)-7-methyl-1h-benzo[d]imidazol-5-yl)piperazin-1-yl)propanenitrile	0.999843	0.997615	0.999993	1	0.966712	1	0.740466	1	1	1	1	0.998577	1	1	0.999471
(s)-3-(naphthalen-1-yloxy)-3-thiophen-2-yl-propylamine	0.987061	0.081311	0.969615	1	1	1	0.136223	0.999286	1	1	1	0.996794	1	1	0.98449
(s)-3-[(s)-2-[(s)-2-tert-butoxycarbonylamino-3-(1h-indol-3-yl)-propionylamino]-6-(3-o-tolyl-ureido)-hexanoylamino]-n-((s)-1-carbamoyl-2-phenyl-ethyl)-n-methyl-succinamic acid	1	0.999966	0.998617	1	0.978485	1	0.627662	0.998573	1	1	1	0.999326	1	1	0.999314
(s)-3-[2-(1-oxo-7-piperazin-1-yl-3,4-dihydro-1h-isoquinolin-2-yl)-acetylamino]-pent-4-ynoic acid	0.000542	0.103364	2.1e-05	0	0.03229	0	0.392594	0	0	0	0	0.0013	0	0	0.000621
(s)-3-[3-(4-carbamimidoyl-phenylcarbamoyl)-propionylamino]-pent-4-ynoic acid ethyl ester	0.267014	0.390817	0.000325	0	0.00122	0	0.354598	0	0	0	0	0.003654	0	0	0.090331
(s)-3-{(s)-2-[(s)-2-((s)-2-acetylamino-3-naphthalen-1-yl-propionylamino)-5-guanidino-pentanoylamino]-propionylamino}-n-{(s)-1-[(1s,2r)-1-((s)-1-carbamoyl-3-methyl-butylcarbamoyl)-2-hydroxy-propylcarbamoyl]-ethyl}-succinamic acid	0.105772	0.6396	0.001017	0	0.062721	0.003979	0.582529	0.001332	0.003979	0	0	0.001458	0.003979	0	0.036082
(s)-3-{[(r)-1-(3-piperidin-4-yl-propionyl)-piperidine-3-carbonyl]-amino}-3-pyridin-3-yl-propionic acid	0.267014	0.390817	0.000325	0	0.00122	0	0.354598	0	0	0	0	0.003654	0	0	0.090331
(s)-3-hydroxy-4-[2-((r)-(s)-3-hydroxy-6-methyl-4-{(r)-3-methyl-2-[(r)-(s)-3-methyl-2-(3-methyl-butyrylamino)-butyrylamino]-butyrylamino}-heptanoylamino)-propionylamino]-6-methyl-heptanoic acid	0.102752	0.084755	0.000578	0	0.051587	0.013889	0.419979	0.020408	0.017143	0	0	0.003654	0.013889	0	0.035661
(s)-4-(2-(n-methylisoquinoline-5-sulfonamido)-3-oxo-3-(4-phenylpiperazin-1-yl)propyl)phenyl isoquinoline-5-sulfonate	0.964209	0.991455	0.999943	1	0.98913	1	0.058871	0.999237	1	1	1	0.996986	1	1	0.987046
(s)-4-(4-amino-6,7-dimethoxy-quinazolin-2-yl)-2-tert-butylcarbamoyl-piperazine-1-carboxylic acid benzyl ester	1	0.999782	0.99999	1	0.965301	1	0.645289	0.999235	1	1	1	0.999896	1	1	0.999962
(s)-5-((1h-indol-3-yl)methyl)-3-(3,5-bis(trifluoromethyl)benzyl)oxazolidine-2,4-dione	1	0.999964	0.999574	1	0.990402	1	0.959188	1	1	1	1	0.999759	1	1	0.999778
(s)-5-benzyloxy-2-diphenylacetyl-6-methoxy-1,2,3,4-tetrahydro-isoquinoline-3-carboxylic acid	1	0.999998	0.999723	1	0.938197	1	1	1	1	1	1	0.999901	1	1	0.999875
(s)-5,7-dihydroxy-2-(7-hydroxy-2,2-dimethyl-2h-chromen-6-yl)-6-(3-methylbut-2-enyl)chroman-4-one	0.373377	0.079794	0.89779	1	1	1	0.245342	0.999286	1	1	0.7	0.856144	1	1	0.709103
(s)-ethyl 4-(3-hydroxyphenyl)-6-methyl-2-thioxo-1,2,3,4-tetrahydropyrimidine-5-carboxylate	0.999844	0.920426	0.808291	1	0.387249	0	0.493741	0	0	0	0.2	0.599364	0	1	0.8025
(s)-n-((6s,9s,12s,15s,18s)-1-amino-15-(aminomethyl)-18-carbamoyl-12-(4-hydroxybenzyl)-1-imino-21-methyl-7,10,13,16-tetraoxo-9-propyl-2,8,11,14,17-pentaazadocosan-6-yl)-1-((s)-2-amino-5-guanidinopentanoyl)pyrrolidine-2-carboxamide	1	0.986921	0.999992	1	0.965152	1	0.708787	1	1	1	1	0.99924	1	1	0.999744
(s)-n-((s)-1-((2s,3r,4s)-1-cyclohexyl-3,4-dihydroxy-6-methylheptan-2-ylamino)-3-(1h-imidazol-4-yl)-1-oxopropan-2-yl)-3-phenylbutanamide	0.003594	0	0	0	0.068204	0	0	0	0	0	0	0.000672	0	0	0.001422
(s)-n-(3-(4-(2-(5-methyl-2-phenyloxazol-4-yl)ethoxy)phenyl)-2-(4-oxo-4-(4-(trifluoromethyl)phenyl)but-2-en-2-ylamino)propyl)propionamide	0.006351	0.00081	0.000292	0	0.001196	0.002392	0.003973	0.010811	0.001618	0	0	0.000895	0.002392	0	0.002513
(s)-n-(3-cyclopropyl-1h-pyrazol-5-yl)-2-(4-(2-oxopyrrolidin-1-yl)phenyl)propanamide	0.003775	0.178915	7.7e-05	0	0.001865	0	0.552425	0	0	0	0	0.0013	0	0	0.001717
(s)-n-(cyanomethyl)-4-methyl-2-((s)-2,2,2-trifluoro-1-(4'-(methylsulfonyl)biphenyl-4-yl)ethylamino)pentanamide	0.999941	0.971903	1	1	0.966262	0.996575	0.652699	0.999263	0.996575	1	1	0.998375	0.996575	1	0.999439
(s)-roscovitine	0.999975	0.934994	0.998417	1	0.999476	1	0.56668	0.999286	1	1	1	0.999033	1	1	0.999142
(s)-sargachromenol	0.013287	0.763129	0.036814	0	0.00262	0.002169	0.182547	0.004808	0.002169	0	0	0.002958	0.002169	0	0.017686
(sc-57666)1-[2-(4-fluorophenyl)-1-cyclopentenyl]-4-methylsulfonylbenzene	1	0.999999	1	1	0.999423	1	1	0.997706	1	1	1	0.999818	1	1	0.999939
(z)-1-(3-((1h-pyrrol-2-yl)methylene)-2-oxoindolin-5-yl)urea	1	0.972269	0.999772	1	0.999476	1	0.674372	0.999286	1	1	1	0.999033	1	1	0.999601
(z)-1-(3-(1-(1h-pyrrol-2-yl)ethylidene)-2-oxoindolin-5-yl)urea	1	0.976346	0.999839	1	0.999476	1	0.687218	0.999286	1	1	1	0.999033	1	1	0.999624
(z)-2-(pyridin-3-ylmethylene)-3-(4-(trifluoromethoxy)phenyl)-2,3-dihydro-1h-pyrrolizin-1-one	6.1e-05	0.895699	1e-06	0	0.002283	0	0.214624	0.001321	0	0	0	0.001005	0	0	0.000355
(z)-2-amino-4-methyl-5-phosphono-pent-3-enoic acid	0.715466	0.461083	0.110001	1	0.00122	0	0.396156	0	0	0	0.3	0.100466	0	0	0.308644
(z)-3-((3,5-dimethyl-1h-pyrrol-2-yl)methylene)-5-hydroxyindolin-2-one	0.999998	0.986178	0.999957	1	0.999476	1	0.722808	0.999286	1	1	1	0.999033	1	1	0.999663
(z)-3-((3a,4,5,6,7,7a-hexahydro-1h-indol-2-yl)methylene)-n,n-dimethyl-2-oxoindoline-5-sulfonamide	1	0.983024	0.999899	1	0.999476	1	0.705356	0.999286	1	1	1	0.999033	1	1	0.999644
(z)-3-(4-iodo-phenyl)-2-mercapto-acrylic acid	0.02506	0.777726	7.6e-05	0	0.00122	0	0.54909	0	0	0	0	0.0021	0	0	0.009078
(z)-5-((5-chloro-2-oxoindolin-3-ylidene)methyl)-n-(2-(diethylamino)ethyl)-2,4-dimethyl-1h-pyrrole-3-carboxamide	0.999987	0.992558	0.999976	1	0.999476	1	0.746836	0.999286	1	1	1	0.999033	1	1	0.999665
(z)-7-[(1r,2r,3s,5s)-5-(biphenyl-4-ylmethoxy)-3-hydroxy-2-piperidin-1-yl-cyclopentyl]-hept-4-enoic acid	1	0.999932	0.994779	1	0.52764	0	0.097112	1	0	0	0.8	0.500205	0	1	0.831661
(z)-isbogrel	5.3e-05	0	3e-06	0	0.057887	0	0	0	0	0	0	0.000987	0	0	0.000348
(z)-n-(3-allyl-5-nitrothiazol-2(3h)-ylidene)pivalamide	0.005726	0.102552	0.001566	0	0.002994	0	0.137391	0	0	0	0	0.003243	0	0	0.003512
[(1r)-1-[[(2s,3r)-3-hydroxy-2-[(6-phenylpyridine-2-carbonyl)amino]-1-oxobutyl]amino]-3-methylbutyl]boronic acid	0.005441	0.245982	8.8e-05	0	0.00122	0	0.263832	0	0	0	0	0.003654	0	0	0.003061
[(3r)-4-(4-chlorobenzyl)-7-fluoro-5-(methylsulfonyl)-1,2,3,4-tetrahydrocyclopenta[b]indol-3-yl]-acetic acid	1	0.92579	0.99981	1	0.999476	1	0.479413	0.999286	1	1	1	0.997337	1	1	0.999049
[(5s,11s,14s)-11-(3-guanidino-propyl)-14-isopropyl-12-methyl-4,7,10,13,16-pentaoxo-3,6,9,12,15-pentaaza-bicyclo[15.3.1]henicosa-1(20),17(21),18-trien-5-yl]-acetic acid	0.000542	0.103364	2.1e-05	0	0.03229	0	0.392594	0	0	0	0	0.0013	0	0	0.000621
[(r)-4-((s)-2-amino-3-mercapto-propyl)-3-(2-methoxy-ethyl)-piperazin-1-yl]-naphthalen-1-yl-methanone	0.024538	0.107853	7.4e-05	0	0.051587	0.013889	0.375641	0.020408	0.017143	0	0	0.0021	0.013889	0	0.008904
[(s)-1-((s)-1-benzyl-2-oxo-ethylcarbamoyl)-2-methyl-propyl]-carbamic acid benzyl ester	0.774433	0.24464	0.001303	1	0.001865	0	0.65827	0	0	0	0	0.598339	0	0	0.458025
[1-(4-fluoro-benzyl)-1h-benzoimidazol-2-yl]-{1-[2-(4-methoxy-phenyl)-ethyl]-piperidin-4-yl}-methanone	1	0.960533	0.999886	1	0.999476	1	0.612436	0.999286	1	1	1	0.999033	1	1	0.99964
[1-(4-fluoro-benzyl)-1h-benzoimidazol-2-yl]-piperidin-4-yl-amine(norastemizole)	0.123247	0.972171	0.255899	0	0.561491	0	0.690361	0	0	0	0.1	0.399213	0	0	0.259453
[1-benzyl-1h-quinolin-(4e)-ylidene]-pentyl-amine	0.023382	0.80389	8.2e-05	0	0.00122	0	0.586482	0	0	0	0	0.0021	0	0	0.008521
[1,2]naphthoquinone	0.008932	0.52234	2.6e-05	0	0.455278	0.018868	0.503418	0	0	0	0.1	0.0013	0.018868	0	0.003419
[14-ethyl-11-(3-guanidino-propyl)-12-methyl-4,7,10,13,16-pentaoxo-3,6,9,12,15-pentaaza-bicyclo[15.3.1]henicosa-1(21),17,19-trien-5-yl]-acetic acid	0.267014	0.390817	0.000325	0	0.00122	0	0.354598	0	0	0	0	0.003654	0	0	0.090331
[2-(8-dimethylamino-octylsulfanyl)-6-isopropyl-pyridin-3-yl]-thiophen-2-yl-methanone	0.966956	0.077019	0.999998	1	1	1	0.070447	0.999286	1	1	1	0.996794	1	1	0.987916
[2-amino-3-(4-hydroxy-phenyl)-propionylamino]-(2,4,5,8-tetrahydroxy-7-oxa-2-aza-bicyclo[3.2.1]oct-3-yl)-acetic acid	0.201789	0.100888	0.001143	0	0	0	0.135976	0	0	0	0	0.002044	0	0	0.068325
[2'-methyl-4'-(5-methyl-[1,2,4]oxadiazol-3-yl)-biphenyl-4-yl]-[3-(1-methyl-piperidine)-2,3,6,7-tetrahydro-1-oxa-5-aza-s-indacen-5-yl]-methanone	0.987061	0.081311	0.969615	1	1	1	0.136223	0.999286	1	1	1	0.996794	1	1	0.98449
[3-(1-benzyl-3-carbamoylmethyl-2-ethyl-1h-indol-5-yloxy)-propyl]-phosphonic acid	0.993234	1	0.999354	1	0.989434	1	0.556304	1	1	1	1	1	1	1	0.997529
[3-(4-bromo-2-fluoro-benzyl)-4-oxo-3,4-dihydro-phthalazin-1-yl]-acetic acid	0.905185	0.026104	0.997963	1	1	1	0.380321	0.999286	1	1	1	0.997541	1	1	0.966896
[3-(6-dimethylamino-4-methyl-pyridin-3-yl)-2,5-dimethyl-pyrazolo[1,5-a]pyrimidin-7-yl]-dipropyl-amine	0.001997	0.111175	6e-06	0	0.038262	0.001368	0.310797	0.002721	0.001368	0	0	0.001713	0.001368	0	0.001239
[4-({3-[3-benzyl-8-(trifluoromethyl)quinolin-4-yl]phenoxy}methyl)phenyl]acetic acid	0.627948	0.494687	0.188774	0	0.981132	1	0.466465	0.999286	1	1	1	0.190726	1	0	0.335816
[4-(3-phenyl-propyl)-piperazin-1-yl]-((r)-2-pyridin-3-yl-thiazolidin-4-yl)-methanone	1	0.999991	0.998177	1	0.996214	1	0.991901	1	1	1	1	0.999498	1	1	0.999225
[4-(3,4-dihydro-quinolin-6-yl)-piperazin-1-yl]-(3,4-dimethoxy-phenyl)-methanone	0.253701	0.429551	0.109099	0	0.481132	0	0.438543	0	0	0	0	0.18618	0	0	0.182994
[4-(4-chloro-phenyl)-butyl]-diethyl-heptyl-ammonium	0.123247	0.972171	0.255899	0	0.561491	0	0.690361	0	0	0	0.1	0.399213	0	0	0.259453
[4-(4-Hydroxy-3-Iodo-Phenoxy)-3,5-Diiodo-Phenyl]-Acetic Acid	0.005726	0.102552	0.001566	0	0.002994	0	0.137391	0	0	0	0	0.003243	0	0	0.003512
[4-carbamoyl-13-(3-guanidino-propyl)-3,3,14-trimethyl-6,9,12,15-tetraoxo-16-(2-oxo-propylamino)-1,2-dithia-5,8,11,14-tetraaza-cycloheptadec-7-yl]-acetic acid	0.000542	0.103364	2.1e-05	0	0.03229	0	0.392594	0	0	0	0	0.0013	0	0	0.000621
[8-(2,4-dichloro-phenyl)-2,7-dimethyl-pyrazolo[1,5-a][1,3,5]triazin-4-yl]-(2-methoxy-1-methoxymethyl-ethyl)-amine	0.000156	0.118214	0	0	0.034367	0	0.012315	0	0	0	0	0.000834	0	0	0.00033
[8-chloro-6-(2-fluoro-phenyl)-4h-2,5,10b-triaza-benzo[e]azulen-1-yl]-methanol	7.4e-05	0.073124	0.000324	0	0.06043	0.001422	0.204652	0	0	0	0	0.001067	0.001422	0	0.000488
{(2r,4s)-2-benzyl-4-[(quinolin-4-ylmethyl)-amino]-piperidin-1-yl}-(3,5-dimethyl-phenyl)-methanone	1	0.964282	0.999886	1	0.999476	1	0.630906	0.999286	1	1	1	0.999033	1	1	0.999639
{(s)-1-methyl-2-phenyl-1-[(r)-2-phenyl-1-(7-ureido-heptylcarbamoyl)-ethylcarbamoyl]-ethyl}-carbamic acid tert-butyl ester	1	0.984625	0.999875	1	0.981987	1	0.593063	0.999251	1	1	1	1	1	1	0.999958
{(s)-2-[(s)-2-{(s)-2-[(s)-2-((s)-2-acetylamino-4-methyl-pentanoylamino)-4-methylsulfanyl-butyrylamino]-4-carbamoyl-butyrylamino}-3-(1h-indol-3-yl)-propionylamino]-3-phenyl-propionylamino}-acetic acid	1	0.999985	0.999826	1	0.967159	1	0.627777	0.995437	1	1	1	0.999489	1	1	0.999772
{(s)-3-[3-(pyridin-2-ylamino)-propoxy]-10,11-dihydro-5h-dibenzo[a,d]cyclohepten-10-yl}-acetic acid	0.16178	0.112169	0.000173	0	0.055778	0.003466	0.356555	0.001529	0	0	0	0.003757	0.003466	0	0.055237
{(s)-4-[2-(4-carbamimidoyl-benzoylamino)-acetyl]-3-methoxycarbonylmethyl-2-oxo-piperazin-1-yl}-acetic acid	0.267014	0.390817	0.000325	0	0.00122	0	0.354598	0	0	0	0	0.003654	0	0	0.090331
{[2-biphenyl-4-yl-1-(1h-tetrazol-5-yl)-ethylamino]-methyl}-phosphonic acid(cgs-26303)	0.989159	0.112258	0.999998	1	1	1	0.103373	0.999286	1	1	1	0.995176	1	1	0.994778
{1-[(s)-2-biphenyl-4-yl-1-(2h-tetrazol-5-yl)-ethylamino]-3-naphthalen-1-yl-propyl}-phosphonic acid	0.989159	0.112258	0.999998	1	1	1	0.103373	0.999286	1	1	1	0.995176	1	1	0.994778
{1-[2-(4-carbamimidoyl-benzoylamino)-propionyl]-1,2,3,4-tetrahydro-pyridin-4-yloxy}-acetic acid(ro 44-3888)	0.267014	0.390817	0.000325	0	0.00122	0	0.354598	0	0	0	0	0.003654	0	0	0.090331
{2-[(2-{2-[2-amino-3-(4-hydroxy-phenyl)-propionylamino]-propionylamino}-acetyl)-methyl-amino]-3-phenyl-propionylamino}-acetic acid	1	0.983954	0.999984	1	0.954298	1	0.673481	0.999263	1	1	1	0.999275	1	1	0.999753
{2-methyl-4-[4-methyl-2-(4-trifluoromethyl-phenyl)-thiazol-5-ylmethylsulfanyl]-phenoxy}-acetic acid	0.005726	0.102552	0.001566	0	0.002994	0	0.137391	0	0	0	0	0.003243	0	0	0.003512
{3-[3-(3-methoxy-4-oxazol-5-yl-phenyl)-ureido]-benzyl}-carbamic acid tetrahydro-furan-3-yl ester	0.995758	1	0.999484	1	0.989434	1	0.525502	1	1	1	1	1	1	1	0.998414
{3-chloro-4-[3-(3-ethyl-7-propyl-benzo[d]isoxazol-6-yloxy)-propylsulfanyl]-phenyl}-acetic acid	0.006628	0.055519	4e-06	0	0.000845	0	0.121006	0	0	0	0	0.00146	0	0	0.002697
{3-chloro-4-[3-(3-phenyl-7-propyl-benzofuran-6-yloxy)-propylsulfanyl]-phenyl}-acetic acid	0.006628	0.055519	4e-06	0	0.000845	0	0.121006	0	0	0	0	0.00146	0	0	0.002697
{4-[(s)-2-acetylamino-2-(1-{(s)-2-carbamoyl-1-[3-(2-hydroxy-naphthalen-1-yl)-propylcarbamoyl]-ethylcarbamoyl}-cyclohexylcarbamoyl)-ethyl]-benzyl}-phosphonic acid	0.244776	0.999312	0.025116	0	0.00765	0.00431	0.902295	0.029851	0.005181	0	0.1	0.2026	0.00431	1	0.157497
{4-[4-(4-carbamimidoyl-phenyl)-piperazin-1-yl]-piperidin-1-yl}-acetic acid (gr 144053)	0.267014	0.390817	0.000325	0	0.00122	0	0.354598	0	0	0	0	0.003654	0	0	0.090331
{8-[(4-carbamimidoyl-phenyl)-methyl-carbamoyl]-3-oxo-4-phenethyl-2,3,4,5-tetrahydro-1h-benzo[e][1,4]diazepin-2-yl}-acetic acid(sb-208651)	0.000542	0.103364	2.1e-05	0	0.03229	0	0.392594	0	0	0	0	0.0013	0	0	0.000621
1-((4-methoxyphenylamino)methyl)naphthalen-2-ol	0.077993	0.955909	0.00011	0	0.00122	0	0.739602	0	0	0	0	0.001616	0	0	0.026573
1-((s)-1-((3s)-2-hydroxy-tetrahydrofuran-3-ylamino)-4-methyl-1-oxopentan-2-yl)-3-phenylthiourea	0.037509	0.786112	7.6e-05	0	0.00122	0	0.558118	0	0	0	0	0.0021	0	0	0.013228
1-(2-(3,5-diphenyl-1h-pyrazol-1-yl)-4-methyl-1,3-thiazol-5-yl)-3-(4-(hydroxy(oxido)amino)phenyl)-2-propen-1-one	0.201789	0.100888	0.001143	0	0	0	0.135976	0	0	0	0	0.002044	0	0	0.068325
1-(2-(3,5-diphenyl-1h-pyrazol-1-yl)-4-methyl-1,3-thiazol-5-yl)-4-methyl-5-phenyl-2,4-pentadien-1-one	0.201789	0.100888	0.001143	0	0	0	0.135976	0	0	0	0	0.002044	0	0	0.068325
1-(2-(4-methoxyphenyl)-2-(3-(4-methoxyphenyl)propoxy)ethyl)-1h-imidazole	0.000241	0.786373	0	0	0.036418	0	0.089396	0.003003	0	0	0	0.004085	0	0	0.001442
1-(2-bromophenyl)-3-(2-hydroxy-4-nitrophenyl)urea	1	0.999828	0.999969	1	0.950433	1	0.661252	0.99925	1	1	1	0.999756	1	1	0.999908
1-(2-diethylamino-ethylamino)-4-hydroxymethyl-thioxanthen-9-one	0.0003	0.840435	0	0	0.003363	0.002132	0.197301	0.004392	0.002132	0	0	0.003543	0.002132	0	0.001281
1-(2,4-dichlorophenyl)-5-(4-iodophenyl)-4-methyl-n-(piperidin-1-yl)-1h-pyrazole-3-carboxamide	1	0.999177	0.997096	1	0.749703	1	0.558261	0.997983	1	1	1	0.999503	1	1	0.998866
1-(2,6-diisopropyl-phenyl)-3-(1-phenyl-cyclopentylmethyl)-urea	0.373377	0.079794	0.89779	1	1	1	0.245342	0.999286	1	1	0.7	0.856144	1	1	0.709103
1-(3-{2-[4-(2-methyl-5-quinolinyl)-1-piperazinyl]ethyl}phenyl)-2-imidazolidinone	9.6e-05	0.073584	0.000141	0	0.000896	0.001792	0.196412	0	0	0	0	0.001375	0.001792	0	0.000537
1-(3-tert-butyl-1-p-tolyl-1h-pyrazol-5-yl)-3-(3-((pyridin-3-yloxy)methyl)-1h-pyrazol-5-yl)urea	0.999997	0.9683	0.999868	1	0.966712	1	0.682478	1	1	1	1	0.998577	1	1	0.99948
1-(4-(1h-indazol-5-yl)piperazin-1-yl)-2-(4-chlorophenyl)-2-hydroxyethanone	0.001372	0.759059	9.4e-05	0	0.00122	0	0.467654	0	0	0	0	0.003654	0	0	0.001706
1-(4-(1h-indazol-5-yl)piperazin-1-yl)-2-amino-2-(4-bromophenyl)ethanone	0.001372	0.759059	9.4e-05	0	0.00122	0	0.467654	0	0	0	0	0.003654	0	0	0.001706
1-(4-(1h-indazol-5-yl)piperazin-1-yl)-2-amino-2-(4-chlorophenyl)ethanone	0.001324	0.45392	2.7e-05	0	0.03229	0	0.466185	0	0	0	0	0.0013	0	0	0.000883
1-(4-(1h-indazol-5-ylamino)piperidin-1-yl)-2-amino-2-(3-chlorophenyl)ethanone	0.000993	0.998941	6e-06	0	0.002955	0	0.479132	0	0	0	0	0.00077	0	0	0.00059
1-(4-(3-(piperidin-1-yl)propoxy)benzyl)piperidine	0.019994	0.624326	9e-05	0	0.00122	0	0.48186	0	0	0	0	0.0021	0	0	0.007394
1-(4-(3-ethyl-7-morpholino-3h-[1,2,3]triazolo[4,5-d]pyrimidin-5-yl)phenyl)-3-(4-(4-methylpiperazine-1-carbonyl)phenyl)urea	0.990728	0.336559	0.999994	1	1	1	0.382842	0.999286	1	1	1	0.993723	1	1	0.994815
1-(4-{[4-(dimethylamino)piperidin-1-yl]carbonyl}phenyl)-3-[4-(4,6-dimorpholin-4-yl-1,3,5-triazin-2-yl)phenyl]urea	0.990728	0.336559	0.999994	1	1	1	0.382842	0.999286	1	1	1	0.993723	1	1	0.994815
1-(4-acetylpiperazin-1-yl)-3-(4-(2-isopropylphenylthio)-3-nitrophenyl)prop-2-en-1-one	0.0869	0.903756	9.7e-05	0	0.00122	0	0.559301	0	0	0	0	0.003243	0	0	0.03008
1-(4-Tert-Butylcarbamoyl-Piperazine-1-Carbonyl)-3-(3-Guanidino-Propyl)-4-Oxo-Azetidine-2-Carboxylic Acid	0.264292	0.560937	8.3e-05	0	0.00122	0	0.408673	0	0	0	0	0.003654	0	0	0.089343
1-(5-methoxy-2-(thiophen-2-yl)quinazolin-4-ylamino)-3-methyl-1h-pyrrole-2,5-dione	0.10112	0.898976	0.000109	0	0.00122	0	0.533266	0	0	0	0	0.003243	0	0	0.034824
1-(8-methoxy-4-o-tolylamino-quinolin-3-yl)-butan-1-one	0.039833	0.105004	6.7e-05	0	0.051587	0.013889	0.409224	0.020408	0.017143	0	0	0.004023	0.013889	0	0.014641
1-(9h-carbazol-9-yl)-3-(naphthalen-1-ylamino)propan-2-ol	0.921542	0.030615	0.997929	1	1	1	0.356023	0.999286	1	1	1	0.997541	1	1	0.972337
1-(oxazolo[4,5-b]pyridin-2-yl)-7-phenylheptan-1-one	0.086323	0.085755	6.1e-05	0	0.051587	0.013889	0.291331	0.020408	0.017143	0	0	0.004023	0.013889	0	0.030136
1-[(1r,6r)-2-methoxy-3,3-dimethyl-6-(4-trifluoromethoxy-phenoxymethyl)-cyclohexylmethyl]-1h-[1,2,4]triazole	6.4e-05	0.04702	2.7e-05	0	0.039259	0	0.176322	0	0	0	0	0.000388	0	0	0.00016
1-[2-(4-fluorophenyl)-4,4-dimethyl-1-cyclopentenyl]-4-methylsulfonylbenzene	1	0.999999	1	1	0.999423	1	1	0.997706	1	1	1	0.999818	1	1	0.999939
1-[2-(5-chloro-2-oxo-benzothiazol-3-yl)-acetyl]-piperidine-4-carboxylic acid (4-chloro-naphthalen-1-yl)-amide	1	0.93581	0.999493	1	0.966712	1	0.48245	1	1	1	1	0.999213	1	1	0.999569
1-[2-(5-chloro-2-oxo-benzothiazol-3-yl)-acetyl]-piperidine-4-carboxylic acid thiazol-2-ylamide	1	0.935713	0.999811	1	0.999476	1	0.498245	0.999286	1	1	1	0.997004	1	1	0.998938
1-[2-[1-[2-amino-3-(4-hydroxyphenyl)-(2s)-propanoyl]-(5s)-dihydro-1h-5-pyrrolylcarboxamido]-3-phenyl-(2s)-propanoyl]-(5r)-dihydro-1h-5-pyrrolecarboxamide	1	0.999997	0.999977	1	0.993962	1	0.999912	0.997571	1	1	1	0.999711	1	1	0.999896
1-[2-fluoro-5-(4-oxo-3,4-dihydro-phthalazin-1-ylmethyl)-phenyl]-pyrrolidine-2,5-dione	0.9986	0.464073	0.999997	1	1	1	0.443933	0.999286	1	1	1	0.995551	1	1	0.998049
1-[3-((r)-1-methyl-pyrrolidin-2-ylmethyl)-1h-indol-5-yl]-1h-benzoimidazole-5-carbonitrile	0.001123	0.124576	0.000167	0	0.002994	0	0.195363	0	0	0	0	0.003654	0	0	0.001648
1-[bis-(4-chloro-phenyl)-methyl]-piperazine	0.0003	0.840435	0	0	0.003363	0.002132	0.197301	0.004392	0.002132	0	0	0.003543	0.002132	0	0.001281
1-{(1r,2s)-3-[(s)-3-(4-fluoro-benzyl)-piperidin-1-yl]-2-hydroxy-1-methyl-propyl}-3-[3-(1-methyl-1h-tetrazol-5-yl)-phenyl]-urea	0.001668	0.7532	7.8e-05	0	0.00122	0	0.468544	0	0	0	0	0.003654	0	0	0.0018
1-{2-[(r)-3-(3,4-dichloro-phenyl)-1-(3,4,5-trimethoxy-benzoyl)-pyrrolidin-3-yl]-ethyl}-4-phenyl-piperidine-4-carboxylic acid amide	1	0.962445	0.999887	1	0.999476	1	0.622283	0.999286	1	1	1	0.999033	1	1	0.99964
1-{2-[2-{6-amino-2-[(5-oxo-pyrrolidine-2-carbonyl)-amino]-hexanoylamino}-3-(1h-indol-3-yl)-propionylamino]-propionyl}-pyrrolidine-2-carboxylic acid (sq 20475)	0.995041	1	0.996845	1	0.970576	1	0.400047	0.999287	1	1	1	0.998554	1	1	0.996813
1-{2-[3-(3,4-dichloro-phenyl)-1-(3,4,5-trimethoxy-benzoyl)-pyrrolidin-3-yl]-ethyl}-4-phenyl-piperidine-4-carboxylic acid amide	1	0.999955	0.99997	1	0.994012	0.998932	0.846432	0.998238	0.998932	1	1	0.999349	0.998932	1	0.999773
1-{2-[4-((r)-2,8-dimethoxy-11,12-dihydro-5h-6,13-dioxa-benzo[3,4]cyclohepta[1,2-a]naphthalen-5-yl)-phenoxy]-ethyl}-piperidine	1	0.999429	1	1	0.504132	1	0.861328	0.997226	1	1	1	1	1	1	1
1-{2-[4-(3,4-dichloro-phenyl)-piperazin-1-yl]-2-oxo-ethyl}-2-(4-fluoro-benzylsulfanyl)-5-(2-methoxy-pyrimidin-5-ylmethyl)-1h-pyrimidin-4-one	0.986547	0.186161	0.999998	1	1	1	0.053654	0.999286	1	1	1	0.995176	1	1	0.993907
1-{2-[4-(4-bromo-benzenesulfonylaminocarbonyl)-benzoylamino]-3-methyl-butyryl}-pyrrolidine-2-carboxylic acid (3,3,3-trifluoro-1-isopropyl-2-oxo-propyl)-amide	0.000309	0.075489	2.1e-05	0	0.03229	0	0.265756	0	0	0	0	0.001054	0	0	0.000461
1-{5-ethyl-2-hydroxy-4-[6-methyl-6-(1h-tetrazol-5-yl)-heptyloxy]-phenyl}-ethanone	1	0.999624	0.998109	1	1	1	0.561582	0.999243	1	1	1	0.999448	1	1	0.999186
1-amino-4-(4-methoxyphenyl)-2-sulfoanthraquinone	1	0.958584	0.99986	1	0.999476	1	0.605425	0.999286	1	1	1	0.999033	1	1	0.999631
1-aza-bicyclo[2.2.1]heptan-3-one o-[3-(3-methoxy-phenyl)-prop-2-ynyl]-oxime	1	0.986797	0.999887	1	0.997908	1	0.777731	0.999244	1	1	1	0.999788	1	1	0.999892
1-benzyl-3-bromo-4-phenethoxypyridin-2(1h)-one	0.999188	0.918861	0.988453	1	0.999476	1	0.519919	0.999286	1	1	1	0.977004	1	1	0.988215
1-benzylimidazole	0.000106	0.075987	2.1e-05	0	0.03229	0	0.213943	0	0	0	0	0.0013	0	0	0.000475
1-butyl-3-propyl-3,4,5,7-tetrahydro-purine-2,6-dione	0.145502	0.075649	0.017503	0	0.017182	0	0.013901	0	0	0	0.1	0.499914	0	0	0.220973
1-Deoxynojirimycin	0.240943	0.99965	0.999496	1	0.611689	1	0.486987	1	1	1	1	0.998221	1	1	0.74622
1-hydroxy-2-(imidazo[1,2-a]pyridin-3-yl)ethane-1,1-diyldiphosphonic acid	0.01013	0	0	0	0.013245	0	0	0.005376	0	0	0	0.021207	0	0	0.010446
1-methyl-16-azatetracyclo[7.6.1.02,7.010,15]hexadeca-2(7),3,5,10(15),11,13-hexaene(mk-801)	0.183619	0.402806	0.437667	0	0.481132	0	0.398764	0	0	0	0	0.18618	0	0	0.269156
1-methyl-1h-indole-2-carboxylic acid (4-{4-amino-1-[4-(4-methyl-piperazin-1-yl)-cyclohexyl]-1h-pyrazolo[3,4-d]pyrimidin-3-yl}-2-methoxy-phenyl)-amide	0.999777	0.997754	0.999993	1	0.966712	1	0.735344	1	1	1	1	0.998577	1	1	0.999449
1-phenyl-cyclopentanecarboxylic acid 2-(2-diethylamino-ethoxy)-ethyl ester	0.983555	0.451601	0.999998	1	1	1	0.379637	0.999286	1	1	1	0.995027	1	1	0.99286
1-ter-butyl-3-(6-(3,5-dimethoxyphenyl)-2-(4-diethylaminobutylamino)-pyrido[2,3-d]pyrimidin-7-yl)urea	1	0.983906	0.999876	1	0.999476	1	0.728266	0.999286	1	1	1	0.999033	1	1	0.999636
1-Tert-Butyl-3-(4-Chloro-Phenyl)-1h-Pyrazolo[3,4-D]Pyrimidin-4-Ylamine	1	0.970252	0.99971	1	0.999476	1	0.641822	0.999286	1	1	1	0.999033	1	1	0.999581
1,1,1-trifluoro-3-{(3-phenoxy-phenyl)-[3-(1,1,2,2-tetrafluoro-ethoxy)-benzyl]-amino}-propan-2-ol	0.986853	1	0.999949	1	0.976954	1	0.473098	0.99926	1	1	1	0.99881	1	1	0.995204
1,2,3-trimethoxy-5-[(z)-2-(4-methoxy-3-nitro-phenyl)-vinyl]-benzene	0.776773	0.025956	0.997966	1	1	1	0.396082	0.999286	1	1	0.8	0.997541	1	1	0.924093
1,3-benzothiazol-2-yl-(2-((2-(3-pyridinyl)ethyl)amino)-4-pyrimidinyl)acetonitrile	0.992155	0.905989	0.859972	1	1	1	0.490998	0.999286	1	1	0.7	0.200546	1	1	0.684224
1,3-bis-(4-amino-2-methyl-quinolin-6-yl)-urea	1	0.952703	0.999889	1	0.999476	1	0.574747	0.999286	1	1	1	0.999033	1	1	0.999641
1,3-di(1h-indazol-6-yl)thiourea	0.077993	0.955909	0.00011	0	0.00122	0	0.739602	0	0	0	0	0.001616	0	0	0.026573
1,3-dibutyl-7-(2-oxo-propyl)-3,7-dihydro-purine-2,6-dione (denbufyllene)	0.145502	0.075649	0.017503	0	0.017182	0	0.013901	0	0	0	0.1	0.499914	0	0	0.220973
1,3-naphthalenediol	0.201789	0.100888	0.001143	0	0	0	0.135976	0	0	0	0	0.002044	0	0	0.068325
1,4,5,6,7,16,17,18,19,19,20,20-dodecachloro-12-sulfohexacyclo[14.2.1.1^{4,7}.0^{2,15}.0^{3,8}.0^{9,14}]icosa-5,9(14),10,12,17-pentaene-11-carboxylic acid	0.047992	0.254853	0.000348	0	0.001865	0	0.555492	0	0	0	0	0.001018	0	0	0.016452
1,5-bis(4-hydroxy-3-methoxyphenyl)penta-1,4-dien-3-one	0.0003	0.840435	0	0	0.003363	0.002132	0.197301	0.004392	0.002132	0	0	0.003543	0.002132	0	0.001281
1,6,7,1',6',7'-hexahydroxy-5,5'-diisopropyl-3,3'-dimethyl-[2,2']binaphthalenyl-8,8'-dicarbaldehyde	0.99785	0.491932	0.99996	1	0.993189	1	0.683814	1	1	1	0.9	0.998221	1	1	0.998677
1,7-diazonia-15,21-diazapentacyclo[20.6.2.27,14.08,13.023,28]dotriaconta-1(29),7(32),8,10,12,14(31),22(30),23(28),24,26-decaene with trifluoroacetate ion	0.020108	0.675593	0.000932	0	0.00122	0	0.469738	0	0	0	0	0.0021	0	0	0.007713
1,8-dihydroxy-3-methoxy-6-methyl-anthraquinone	0.053338	0.29437	8.2e-05	0	0.00122	0	0.26678	0	0	0	0	0.003654	0	0	0.019024
1,8-dihydroxy-3-methyl-anthraquinone	0.053338	0.29437	8.2e-05	0	0.00122	0	0.26678	0	0	0	0	0.003654	0	0	0.019024
1'-[3-(3,4-dichlorophenyl)-4-methyl(phenyl)carboxamidobutyl]spiro[1,3-dihydroisobenzofuran-1,4'-(hexahydropyridine)]	1	0.999964	0.999574	1	0.990402	1	0.959188	1	1	1	1	0.999759	1	1	0.999778
10-(5-(diethylamino)pentyl)acridin-9(10h)-one	0.987061	0.081311	0.969615	1	1	1	0.136223	0.999286	1	1	1	0.996794	1	1	0.98449
10-(6-(diethylamino)hexyl)acridin-9(10h)-one	0.005268	0.289886	7.6e-05	0	0.00122	0	0.322998	0	0	0	0	0.003654	0	0	0.002999
10-[3-(4-oxo-1-phenyl-1,3,8-triaza-spiro[4.5]dec-8-yl)-propyl]-10h-phenothiazine-2-sulfonic acid dimethylamide	1	0.96653	0.999872	1	0.999476	1	0.64331	0.999286	1	1	1	0.999033	1	1	0.999635
10-epi-8-deoxy-cumambrin b	6.1e-05	0.895699	1e-06	0	0.002283	0	0.214624	0.001321	0	0	0	0.001005	0	0	0.000355
10,13-dimethyl-7,8,9,10,11,12,13,14,15,16-decahydro-6h-cyclopenta[a]phenanthrene-3,17-dione	0.001581	0.070609	2e-05	0	0.001255	0	0.157527	0.001825	0.001745	0	0	0.006843	0	0	0.002814
11-(4-acetyl-phenyl)-17-hydroxy-13-methyl-17-pentafluoroethyl-1,2,6,7,8,11,12,13,14,15,16,17-dodecahydro-cyclopenta[a]phenanthren-3-one(zk 230211)	0.602143	0.98028	0.203942	1	0.170017	0	0.759359	0.999288	0	0	0.4	1	0	1	0.602028
11beta,13-dihydro-10-epi-8-deoxycumam-brin b	6.1e-05	0.895699	1e-06	0	0.002283	0	0.214624	0.001321	0	0	0	0.001005	0	0	0.000355
11h-2,5,11-triaza-benzo[a]trindene-1,3,4,6-tetraone	0.999792	0.927125	0.994791	1	0.999476	1	0.544563	0.999286	1	1	1	0.999033	1	1	0.997872
12-(2-cyanoethyl)-6,7,12,13-tetrahydro-13-methyl-5-oxo-5h-indolo[2,3-a]pyrrolo[3,4-c]carbazole	0.999988	0.992881	0.999969	1	0.999476	1	0.764761	0.999286	1	1	1	0.999033	1	1	0.999663
12,13-dehydro-8-o-acetylmanzamine a	0.991312	0.887742	0.895233	1	1	1	0.470374	0.999286	1	0	0.3	0.499561	1	1	0.795369
12,13-dehydromanzamine a	0.991312	0.887742	0.895233	1	1	1	0.470374	0.999286	1	0	0.3	0.499561	1	1	0.795369
13-methyl-10-prop-2-ynyl-1,6,7,8,9,10,11,12,13,14,15,16-dodecahydro-2h-cyclopenta[a]phenanthrene-3,17-dione	6.1e-05	0.895699	1e-06	0	0.002283	0	0.214624	0.001321	0	0	0	0.001005	0	0	0.000355
14h-diindolo[2,3-a:3',2'-h]quinolizine	0.996338	1	0.999484	1	0.989434	1	0.379816	1	1	1	1	1	1	1	0.998607
15-(3-guanidino-propyl)-8-isobutyl-18-(6-methoxy-3,5-dimethyl-7-phenyl-hepta-1,3-dienyl)-1,5,12,19-tetramethyl-2-methylene-3,6,9,13,16,20,25-heptaoxo-1,4,7,10,14,17,21heptaaza-cyclopentacosane-11,22-dicarboxylic acid	0.701513	0.418277	0.977621	0	0.743707	0	0.23415	1	0	0	0.3	0.39913	0	1	0.692755
16-hydroxymethyl-(15r,16r,18s)-28-oxa-4,14,19-triazaoctacyclo[12.11.2.115,18.02,6.07,27.08,13.019,26.020,25]octacosa-1(26),2(6),7(27),8(13),9,11,20(25),21,23-nonaene-3,5-dione	1	0.985846	0.999986	1	0.966712	1	0.690514	1	1	1	1	0.998577	1	1	0.999521
16-methyl-6,14-diazatetracyclo[7.5.3.01,10.02,7]heptadeca-2(7),3,16-trien-5-one	0.997365	0.375522	0.998594	1	1	1	0.445619	0.999286	1	1	1	0.993723	1	1	0.996561
17-hydroxymethyl-18-oxa-4,14,22-triazahexacyclo[20.6.1.17,14.02,6.08,13.023,28]triaconta-1(29),2(6),7(30),8(13),9,11,23(28),24,26-nonaene-3,5-dione	0.999714	0.999339	0.999994	1	0.966712	1	0.778537	1	1	1	1	0.998577	1	1	0.999428
17,25-diazonia-2,9-diazaheptacyclo[23.6.2.24,7.210,17.119,23.011,16.026,31]octatriaconta-1(32),4,6,10(35),11,13,15,17(34),19,21,23(38),25(33),26(31),27,29,36-hexadecaene dibromide	0.019001	0.226804	0.000155	0	0.001865	0	0.556822	0	0	0	0	0.0013	0	0	0.006819
1beta-hydroxyaleuritolic acid-3-p-hydroxybenzoate	0.553765	0.060131	0.993962	1	1	1	0.286314	0.999286	1	1	1	1	1	1	0.849242
1beta,20-(s)-dihydroxydammar-24(25)-ene-3beta-o-stearate	0.11457	0.999804	0.000434	0	0.033704	0	0.79768	0	0	0	0	0.00356	0	0	0.039521
1h-tetrazole-5-carboxylic acid {5-[3-(4-acetyl-3-hydroxy-2-propyl-phenoxy)-propoxy]-4-chloro-2-methyl-phenyl}-amide(gcp 35-949b)	1	0.967374	0.999779	1	0.999476	1	0.653583	0.999286	1	1	1	0.999033	1	1	0.999604
2-((2s,5r,8s,11s)-5-benzyl-11-(3-guanidinopropyl)-8-isopropyl-7-methyl-3,6,9,12,15-pentaoxo-1,4,7,10,13-pentaazacyclopentadecan-2-yl)acetic acid	0.000879	0.081352	2.1e-05	0	0.03229	0	0.258632	0	0	0	0	0.0013	0	0	0.000733
2-((3-((2-(4-chlorophenyl)-5-methyloxazol-4-yl)methoxy)benzyl)(methoxycarbonyl)amino)acetic acid	0.006351	0.00081	0.000292	0	0.001196	0.002392	0.003973	0.010811	0.001618	0	0	0.000895	0.002392	0	0.002513
2-((3-(4-(5-(2-(3-fluorophenylamino)-2-oxoethyl)-1h-pyrazol-3-ylamino)quinazolin-7-yloxy)propyl)(methyl)amino)ethyl dihydrogen phosphate	0.999062	0.907284	0.991668	1	0.966712	1	0.54118	1	1	1	1	0.999213	1	1	0.996647
2-((3,5-di-tert-butyl-4-hydroxyphenyl)-methylene)-4-cyclopentene-1,3-dione	0.01249	0.648754	0.956903	0	0.00122	0	0.449726	0	0	0	0	0.025466	0	0	0.33162
2-(1-azepanylmethyl)-4-{1-[3-(1-azepanylmethyl)-4-hydroxyphenyl]-1-methylethyl}phenol	0.999847	0.999992	0.999739	1	0.891956	1	0.834244	0.99786	1	1	1	0.999689	1	1	0.999758
2-(12-hydroxydodeca-5,10-diynyl)-3,5,6-trimethylcyclohexa-2,5-diene-1,4-dione	0.857805	0.237391	0.892536	1	0.928571	1	0.011109	1	1	1	1	0.996546	1	1	0.915629
2-(1r-isopropyl-2-hydroxyethylamino)-6-(3-chloro-4-carboxyanilino)-9-isopropylpurine	0.020968	0.313806	0.000108	0	0.001865	0	0.574848	0	0	0	0	0.0013	0	0	0.007459
2-(2-(5-bromo-2-methoxyphenethyl)-3-fluorophenyl)-4,5-dihydro-1h-imidazole	1	0.964721	0.999898	1	0.999476	1	0.625516	0.999286	1	1	1	0.999033	1	1	0.999644
2-(2-chloro-4-iodophenylamino)-n-(cyclopropylmethoxy)-3,4-difluorobenzamide	0.99954	0.923979	0.993427	1	0.999476	1	0.515597	0.999286	1	1	1	0.977004	1	1	0.98999
2-(2-chloro-ethyl)-2,3-dihydro-benzo[e][1,3]oxazin-4-one (chlorthenoxazin)	0.9986	0.464073	0.999997	1	1	1	0.443933	0.999286	1	1	1	0.995551	1	1	0.998049
2-(2-chlorophenoxy)-n-(4-methyl-2-(pyrrolidin-1-yl)quinazolin-6-yl)acetamide	1	0.959977	0.999976	1	0.966915	1	0.603607	1	1	1	1	0.998974	1	1	0.99965
2-(2-fluorobenzyl)-3-(4-fluorophenyl)-7-(trifluoromethyl)-2hindazole	0.504135	0.293878	0.03724	0	0.002994	0	0.364122	0.999286	0	0	0.3	0.205344	0	0	0.248906
2-(2,2-diphenyl-cyclopropyl)-4,5-dihydro-1h-imidazole	0.976243	0.983175	0.98366	1	1	1	0.645515	0.999286	1	1	1	0.899476	1	1	0.953126
2-(2,3-dihydro-benzo[1,4]dioxin-2-yl)-4-(3-trifluoromethyl-phenyl)-thiazole	0.986005	0.082411	0.999984	1	1	1	0.116636	0.999286	1	1	1	0.996794	1	1	0.994261
2-(2,4,5-trichlorophenoxy)-propanoic acid	0.267669	0.945463	0.278991	0	0.44391	0	0.367836	0	0	0	0.3	0.00057	0	0	0.18241
2-(3-((1-(2-naphthoyl)piperidin-4-yl)(methyl)carbamoyl)naphthalen-2-yl)-1-(naphthalen-1-yl)-2-oxoethylphosphonic acid	0.064259	0.326457	8.4e-05	0	0.00122	0	0.294827	0	0	0	0	0.003654	0	0	0.022665
2-(3-(9-chloro-3-methyl-4-oxoisoxazolo[4,3-c]quinolin-5(4h)-yl)phenyl)-n-(3,4,5-trimethoxyphenyl)acetamide	0.880798	0.99426	0.194953	1	0.557642	0	0.420624	0	1	0	0.4	0.604199	0	0	0.559983
2-(3-chloro-4-hydroxyphenethylamino)-4-(benzylamino)pyrimidine-5-carboxamide	0.553969	0.415747	0.955563	1	0.668221	1	0.378839	1	1	0	1	0.599475	1	0	0.703002
2-(3-chlorophenoxy)-n-(4-methyl-2-(pyrrolidin-1-yl)quinazolin-6-yl)acetamide	1	0.959977	0.999976	1	0.966915	1	0.603607	1	1	1	1	0.998974	1	1	0.99965
2-(3-decyloxypyridinium-1-yl)ethylidene-1,1-bisphosphonic acid	0.948356	1	0.999485	1	0.862348	1	0.673504	1	1	1	1	0.99881	1	1	0.982217
2-(3-methoxy-phenyl)-3-morpholin-4-ylmethyl-1,1-dioxo-1,2-dihydro-1lambda*6*-thieno[3,2-e][1,2]thiazine-6-sulfonic acid amide	0.97162	0.080163	0.999639	1	1	1	0.124021	0.999286	1	1	1	0.996794	1	1	0.989351
2-(3,4-dichloro-phenyl)-n-methyl-n-((s)-1-phenyl-2-pyrrolidin-1-yl-ethyl)-acetamide	0.001473	0.750757	8e-05	0	0.00122	0	0.465957	0	0	0	0	0.003654	0	0	0.001736
2-(3,4-dichloro-phenyl)-n-methyl-n-(2-methyl-1-pyrrolidin-1-ylmethyl-propyl)-acetamide	1	0.999995	0.999395	1	0.980805	1	0.897662	0.997619	1	1	1	0.999901	1	1	0.999765
2-(3,4-dichloro-phenyl)-n-methyl-n-(2-pyrrolidin-1-yl-cyclohexyl)-acetamide(u-50488)	1	0.983954	0.999984	1	0.954298	1	0.673481	0.999263	1	1	1	0.999275	1	1	0.999753
2-(3,4-dihydroxy-phenyl)-3,7-dihydroxy-chromen-4-one	0.181973	0.391921	6.3e-05	0	0.2375	0	0.400486	0	0	0	0	0.003654	0	0	0.061896
2-(3,4-dimethoxy-benzyl)-7-[(r)-1-((r)-1-hydroxy-ethyl)-4-phenyl-butyl]-5-methyl-3h-imidazo[5,1-f][1,2,4]triazin-4-one	0.915177	0.323612	0.882799	1	0.367644	0	0.144731	0.999283	0	1	0.5	0.99919	0	1	0.932389
2-(4-(4,4-bis(4-fluorophenyl)butyl)piperazin-1-yl)-n-(2,6-dimethylphenyl)acetamide	0.98079	0.162733	0.999998	1	1	1	0.07689	0.999286	1	1	1	0.995176	1	1	0.991988
2-(4-chlorophenyl)-2h-pyrazolo[4,3-c]quinolin-3(5h)-one	0.008155	0.097849	0.000224	0	0	0	0.155097	0	0	0	0	0.003243	0	0	0.003874
2-(4-ethylpiperazin-1-yl)-n-(4-(2-morpholino-4-oxo-4h-chromen-8-yl)dibenzo[b,d]thiophen-1-yl)acetamide	0.992587	0.306055	0.999997	1	1	1	0.360988	0.999286	1	1	1	0.993489	1	1	0.995358
2-(4-fluoro-phenyl)-4-methoxy-3-pyridin-4-yl-1h-pyrrolo[2,3-b]pyridin-6-ylamine	0.000857	0.589265	6.4e-05	0	0.00122	0	0.406714	0	0	0	0	0.003654	0	0	0.001525
2-(4-hydroxy-phenyl)-3-methyl-1-[10-(pentane-1-sulfonyl)-decyl]-1h-indol-5-ol	0.59934	0.956461	0.048212	0	0.009202	0	0.815842	0	0	0	0	0.00679	0	0	0.218114
2-(4-methyl-piperazin-1-yl)-5-(2,3,5-trichloro-phenyl)-pyrimidin-4-ylamine	0.072626	0.955367	0.000314	0	0.00122	0	0.605538	0	0	0	0	0.00115	0	0	0.024697
2-(4-oxo-3-((5-(trifluoromethyl)benzo[d]thiazol-2-yl)methyl)-3,4-dihydrophthalazin-1-yl)acetic acid	0.935065	1	0.00179	1	0.973356	0.9967	0.756621	1	0.9967	1	1	1	0.9967	1	0.645618
2-(4'-bromo-biphenyl-4-sulfonylamino)-3-methyl-butyric acid	0.935883	0.330432	0.999597	1	1	1	0.409122	0.999286	1	1	0.9	0.66685	1	1	0.867443
2-(5-(benzo[d][1,3]dioxol-5-yl)-2-tert-butyl-1h-imidazol-4-yl)-6-methylpyridine	0.993418	0.888355	0.912452	1	0.5	0	0.464224	0.999286	0	0	0.2	0.200711	0	1	0.702194
2-(5-methoxy-1h-indol-3-yl)ethanamine	0.011632	0.237412	0.000133	0	0.001865	0	0.518455	0	0	0	0	0.0013	0	0	0.004355
2-(6-ethoxy-4-methylquinazolin-2-ylamino)quinazolin-4-ol	1	0.999961	0.999156	1	0.982856	1	0.584027	0.999287	1	1	1	1	1	1	0.999719
2-(butane-1-sulfonylamino)-3-{[4-oxo-5-(2-piperidin-4-yl-ethyl)-4,5,6,7-tetrahydro-pyrazolo[1,5-a]pyrazine-2-carbonyl]-amino}-propionic acid(l-734115)	0.267014	0.390817	0.000325	0	0.00122	0	0.354598	0	0	0	0	0.003654	0	0	0.090331
2-(morpholin-4-yl)-benzo[h]chromen-4-one	0.929068	0.383413	0.999972	1	1	1	0.400424	0.999286	0.017143	1	0.7	0.857813	1	1	0.928951
2-[(1-{[1-(6-amino-hexanoylamino)-2-phenyl-ethyl]-hydroxy-phosphinoylmethyl}-cyclopentanecarbonyl)-amino]-3-(1h-indol-3-yl)-propionic acid	0.456772	0	0.228011	0	0.296685	1	0	0	0	1	0.8	0.400335	1	0	0.361706
2-[(2s,3s)-3-(3,5-bis-trifluoromethyl-benzyloxy)-2-phenyl-piperidin-1-yl]-acetamide	1	0.999964	0.999574	1	0.990402	1	0.959188	1	1	1	1	0.999759	1	1	0.999778
2-[(5r,6r)-2,2-dimethyl-6-[1,2,4]triazol-1-ylmethyl-5-(4-trifluoromethoxy-phenoxymethyl)-cyclohexyloxy]-ethanol	6.4e-05	0.04702	2.7e-05	0	0.039259	0	0.176322	0	0	0	0	0.000388	0	0	0.00016
2-[1-(2-chloro-benzyl)-2-methyl-5-methylsulfanyl-1h-indol-3-yl]-ethylamine	0.000204	0.724958	1e-06	0	0.022945	0	0.166177	0.001508	0	0	0	0.00245	0	0	0.000885
2-[2-(1h-imidazol-4-yl)-ethyl]-isothiourea	1	0.950863	0.999923	1	0.968498	1	0.552632	1	1	1	1	0.999217	1	1	0.999713
2-[2-(3-chloro-2-methyl-benzenesulfonylamino)-thiazol-4-yl]-n,n-diethyl-acetamide	0.05368	0.659976	0.000385	0	0.481132	0	0.651018	0	0.017143	0	0	0.299099	0	0	0.117721
2-[4-(2-amino-4-hydroxy-quinazolin-6-ylmethylsulfanyl)-benzoylamino]-pentanedioic acid	0.991799	1	1	1	0.972677	0.995074	0.194858	0.999284	0.995074	1	1	1	0.995074	1	0.997266
2-[4-(2-piperidin-1-ylethoxy)phenoxy]benzooxazole	0.002289	0.105655	2.2e-05	0	0.03229	0	0.39071	0	0	0	0	0.0013	0	0	0.001203
2-{(5r,6r)-5-[2-(4-ethyl-phenyl)-ethyl]-2,2-dimethyl-6-[1,2,4]triazol-1-ylmethyl-cyclohexyloxy}-ethanol	6.4e-05	0.04702	2.7e-05	0	0.039259	0	0.176322	0	0	0	0	0.000388	0	0	0.00016
2-{1-[(4-chlorophenyl)carbonyl]-5-methoxy-2-methylindol-3-yl}ethanehydroxamic acid	0.012883	0.894923	0.009021	0	0.00122	0	0.49062	0	0	0	0	0.001633	0	0	0.007846
2-{1-methoxy-1-[3-(naphthalen-2-ylmethoxy)-phenyl]-propyl}-thiazole	0.857805	0.237391	0.892536	1	0.928571	1	0.011109	1	1	1	1	0.996546	1	1	0.915629
2-{2-[3-(4-carbamimidoyl-benzoylamino)-propionylamino]-3-carboxy-propionylamino}-3-methyl-butyric acid (ro 43-5054)	0.267014	0.390817	0.000325	0	0.00122	0	0.354598	0	0	0	0	0.003654	0	0	0.090331
2-{2-butyl-4-oxo-3-[2'-(1h-tetrazol-5-yl)-biphenyl-4-ylmethyl]-3,4-dihydro-imidazo[4,5-c]pyridin-5-yl}-n,n-dimethyl-acetamide	1	0.999769	0.999963	1	0.984826	1	0.717874	0.998403	1	1	1	0.999438	1	1	0.9998
2-{4-[(2-amino-4-hydroxy-quinazolin-6-ylamino)-methyl]-benzoylamino}-pentanedioic acid	0.991799	1	1	1	0.972677	0.995074	0.194858	0.999284	0.995074	1	1	1	0.995074	1	0.997266
2-{4-[1-(3,4-bis-difluoromethoxy-phenyl)-2-(1-oxy-pyridin-4-yl)-ethyl]-phenyl}-1,1,1,3,3,3-hexafluoro-propan-2-ol	0.998347	0.715446	0.999938	1	1	1	0.691521	0.999286	1	1	1	0.995551	1	1	0.997945
2-alpha-hydroxyursolic acid	0.039444	0.687249	0.017806	0	0.254193	0.018868	0.54956	0	0	0	0	0.0013	0.018868	0	0.019516
2-amino-3-[4-(4-hydroxy-3-iodo-phenoxy)-3,5-diiodo-phenyl]-propionic acid	0.005726	0.102552	0.001566	0	0.002994	0	0.137391	0	0	0	0	0.003243	0	0	0.003512
2-amino-3-methyl-5-((4-(4-sulfophenylamino)phenyl)(4-(4-sulfophenylimino)cyclohexa-2,5-dienylidene)methyl)benzenesulfonic acid	0.978517	0.796223	0.999996	1	0.981132	1	0.574235	0.999286	1	1	1	0.888148	1	1	0.955553
2-amino-4-oxo-4,7-dihydro-3h-pyrrolo[2,3-d]pyrimidine-5-carboxylic acid (2-carbamimidoyl-ethyl)-amide	0.099447	0.079808	6e-05	0	0.051587	0.013889	0.163526	0.020408	0.017143	0	0	0.003556	0.013889	0	0.034354
2-amino-n-[(r)-2-((r)-3a-benzyl-2-methyl-3-oxo-2,3,3a,4,6,7-hexahydro-pyrazolo[4,3-c]pyridin-5-yl)-1-benzyloxymethyl-2-oxo-ethyl]-2-methyl-propionamide	1	0.999961	0.99753	1	0.963582	1	0.560624	0.997717	1	1	1	0.999583	1	1	0.999038
2-ammonio-2-(hydroxymethyl)-4-(4-octylphenyl)butyl hydrogen phosphate	1	0.957734	0.999858	1	0.999476	1	0.590427	0.999286	1	1	1	0.999033	1	1	0.99963
2-benzenesulfonylamino-3-{[5-(piperidin-4-ylmethoxy)-1h-indole-2-carbonyl]-amino}-propionic acid(l-756568)	0.267014	0.390817	0.000325	0	0.00122	0	0.354598	0	0	0	0	0.003654	0	0	0.090331
2-benzo[a]anthracen-12-yl-1-benzothiophene	0.996338	1	0.999484	1	0.989434	1	0.379816	1	1	1	1	1	1	1	0.998607
2-benzyl-n-[1-(1-cyclohexylmethyl-2,3-dihydroxy-5-methyl-hexylcarbamoyl)-2-thiazol-4-yl-ethyl]-3-(4-methyl-piperazine-1-sulfonyl)-propionamide (zankiren (a-72517))	0.003594	0	0	0	0.068204	0	0	0	0	0	0	0.000672	0	0	0.001422
2-benzyloxycarbonylamino-3-{[(r)-1-(3-piperidin-4-yl-propionyl)-piperidine-3-carbonyl]-amino}-propionic acid	0.267014	0.390817	0.000325	0	0.00122	0	0.354598	0	0	0	0	0.003654	0	0	0.090331
2-bromo-5-hydroxy-3-methoxy-6-{2-methoxycarbonyl-2-[4-(4-nitro-phenyl)-thiazol-2-ylamino]-ethylsulfanylmethyl}-benzoic acid methyl ester	0.007419	0.496881	0.000737	0	0.001865	0	0.5698	0	0	0	0	0.000598	0	0	0.002918
2-butyl-3-(2'-(butyloxycarbonylaminosulphonyl)-biphenyl-4-ylmethyl)-6-(n-isopropyl-n-methyl-aminocarbonylamino)-3h-quinazolin-4-one	1	0.999769	0.999963	1	0.984826	1	0.717874	0.998403	1	1	1	0.999438	1	1	0.9998
2-chloro-5-(2-phenyl-5-(pyridin-4-yl)-1h-imidazol-4-yl)phenol	0.999999	0.963724	0.998828	1	0.999476	1	0.652154	0.999286	1	1	1	0.999033	1	1	0.999287
2-cyano-3-hydroxy-but-2-enoic acid (4-trifluoromethyl-phenyl)-amide	0.076201	0	0.997372	0	0	0	0	0.002606	0	0	0	0.2	0	1	0.424524
2-ethoxy-3-[4-(2-phenoxazin-10-yl-ethoxy)-phenyl]-propionic acid	0.005726	0.102552	0.001566	0	0.002994	0	0.137391	0	0	0	0	0.003243	0	0	0.003512
2-ethyl-4-[2'-(1h-tetrazol-5-yl)-biphenyl-4-ylmethoxy]-quinoline	1	0.999769	0.999963	1	0.984826	1	0.717874	0.998403	1	1	1	0.999438	1	1	0.9998
2-ethyl-5,7-dimethyl-3-[2'-(2h-tetrazol-5-yl)-biphenyl-4-ylmethyl]-3h-imidazo[4,5-b]pyridine	1	0.999769	0.999963	1	0.984826	1	0.717874	0.998403	1	1	1	0.999438	1	1	0.9998
2-hydroxy-4-(2-hydroxy-6-pentadecyl-4-((2s,3r,4s,5s,6r)-3,4,5-trihydroxy-6-(hydroxymethyl)tetrahydro-2h-pyran-2-yloxy)benzoyloxy)-6-methylbenzoic acid	0.80018	0.444843	0.001336	0	0.00122	0	0.392882	0	0	0	0	0.003243	0	0	0.268253
2-imidazol-1-ylmethyl-4,5-dihydro-benzo[b]thiophene-6-carboxylic acid	5.3e-05	0	3e-06	0	0.057887	0	0	0	0	0	0	0.000987	0	0	0.000348
2-methoxy-5-[(z)-2-(3,4,5-trimethoxy-phenyl)-vinyl]-phenol	0.776773	0.025956	0.997966	1	1	1	0.396082	0.999286	1	1	0.8	0.997541	1	1	0.924093
2-methoxy-5-[(z)-2-(3,4,5-trimethoxy-phenyl)-vinyl]-phenylamine	0.776773	0.025956	0.997966	1	1	1	0.396082	0.999286	1	1	0.8	0.997541	1	1	0.924093
2-methyl-6-((e)-styryl)-pyridine	0.215302	0.986729	0.357384	0	0.442937	0	0.703201	0.999277	0.001522	0	0.1	0.5	0	0	0.357562
2-methyl-n-[4-(2,3,4,5-tetrahydro-benzo[b][1,4]diazepine-1-carbonyl)-phenyl]-benzamide	1	0.958447	0.999812	1	0.966712	1	0.539143	1	1	1	1	0.999213	1	1	0.999675
2-morpholino-6-(thianthren-1-yl)-4h-pyran-4-one	0.943775	0.40577	0.999993	1	1	1	0.404532	0.999286	0.017143	1	0.8	0.993723	1	1	0.979164
2-nitro-phenanthrene-9,10-dione	1	0.993212	0.999886	1	0.999476	1	0.698534	0.999286	1	1	1	0.999476	1	1	0.999787
2-pyridin-4-yl-1,5,6,7-tetrahydro-pyrrolo[3,2-c]pyridin-4-one	0.99897	0.919225	0.98472	1	0.999476	1	0.515203	0.999286	1	1	1	0.977004	1	1	0.986898
2,2-diethyl-n-[3-(7-fluoro-quinolin-2-ylmethoxy)-phenyl]-succinamic acid	1	0.967374	0.999779	1	0.999476	1	0.653583	0.999286	1	1	1	0.999033	1	1	0.999604
2,2,4-trimethyl-5-[1-o-tolyl-meth-(z)-ylidene]-2,5-dihydro-1h-6-oxa-1-aza-chrysene	0.024742	0.93244	0.000371	0	0.00122	0	0.567704	0	0	0	0	0.00115	0	0	0.008754
2,3-bis-[amino-(2-amino-phenylsulfanyl)-methylene]-succinonitrile	0.99954	0.923979	0.993427	1	0.999476	1	0.515597	0.999286	1	1	1	0.977004	1	1	0.98999
2,3-bis(2-hydroxyethylthio)naphthalene-1,4-dione	0.882976	0.196622	0.999998	1	1	1	0.189674	0.999286	1	1	1	0.993489	1	1	0.958821
2,3-dihydro-1h-indole-3-carboxylic acid (3s,7s)-10-oxo-8-aza-tricyclo[5.3.1.0*3,8*]undec-5-yl ester	0.976243	0.983175	0.98366	1	1	1	0.645515	0.999286	1	1	1	0.899476	1	1	0.953126
2,3-dihydro-5-epireveromycin a	0.996913	0.978938	0.999999	1	0.968952	1	0.735013	1	1	1	1	0.996269	1	1	0.997727
2,3-dihydroreveromycin a	0.996913	0.978938	0.999999	1	0.968952	1	0.735013	1	1	1	1	0.996269	1	1	0.997727
2,3-dinitro-9h-fluoren-9-one	0.077993	0.955909	0.00011	0	0.00122	0	0.739602	0	0	0	0	0.001616	0	0	0.026573
2,3,5-trimethyl-6-pyridin-3-ylmethyl-[1,4]benzoquinone	5.3e-05	0	3e-06	0	0.057887	0	0	0	0	0	0	0.000987	0	0	0.000348
2,4-dioxo-n-(2-(piperidin-1-yl)ethyl)-3-propyl-1,2,3,4-tetrahydroquinazoline-7-carboxamide	0.006345	0.696685	1.4e-05	0	0.019664	0	0.190509	0.001236	0	0	0	0.014345	0	0	0.006902
2,4-disulfamyltrifluoromethylaniline	0.968141	0.448332	0.996697	1	0.973333	1	0.146883	0.999249	1	1	1	0.994997	1	1	0.986612
2,6-diphenyl-8-cyclohexyl-1-deazapurine	1	0.935862	1	1	0.993817	1	0.580078	0.998471	1	1	1	0.999432	1	1	0.999811
2,7-diethyl-5-[2'-(1h-tetrazol-5-yl)-biphenyl-4-ylmethyl]-5h-pyrazolo[1,5-b][1,2,4]triazole	1	0.989759	0.999381	1	0.98523	1	0.712621	0.997238	1	1	1	0.999151	1	1	0.999511
2,8-diamino-9-thiophen-2-ylmethyl-1,9-dihydro-purin-6-one	0.996233	1	0.998909	1	0.994055	0.996441	0.426316	0.998557	0.996441	1	1	1	0.996441	1	0.998381
2'-epi-tuberatolide b	0.013287	0.763129	0.036814	0	0.00262	0.002169	0.182547	0.004808	0.002169	0	0	0.002958	0.002169	0	0.017686
2'-methyl-4'-(5-methyl-[1,2,4]oxadiazol-3-yl)-biphenyl-4-carboxylic acid [4-methoxy-3-(4-methyl-piperazin-1-yl)-phenyl]-amide	2.5e-05	0.843856	7e-06	0	0.002955	0	0.160897	0	0	0	0	0.00077	0	0	0.000267
2(r,s)-{2-[(1h-indole-2-carbonyl)amino]-benzoylamino}propionic acid	1	0.999201	0.999894	1	0.988964	1	0.614658	0.999267	1	1	1	0.999511	1	1	0.999802
2(r,s)-{2-[(2-acetylaminocinnamoyl)amino]benzoylamino}-3-phenylpropionic acid	1	0.996873	0.999223	1	0.963215	1	0.602311	0.996466	1	1	1	0.999616	1	1	0.999613
2s,4r-4-Methylglutamate	0.985339	0.516209	0.875508	1	0.981132	1	0.483193	0.999286	1	1	1	0.774942	1	0	0.878596
3 9-dihydro-n-desmethyl-n-isopropylerythromycin a	0.976243	0.983175	0.98366	1	1	1	0.645515	0.999286	1	1	1	0.899476	1	1	0.953126
3-((1h-imidazol-1-yl)methyl)-1-benzyl-5-nitro-1h-indole-2-carbaldehyde	6.1e-05	0.895699	1e-06	0	0.002283	0	0.214624	0.001321	0	0	0	0.001005	0	0	0.000355
3-((1h-imidazol-4-yl)methylene)-5-methoxyindolin-2-one	0.489537	0.836363	0.001665	0	0.001865	0	0.626393	0	0	0	0	0.080598	0	0	0.1906
3-((1h-pyrrol-2-yl)methylene)-6-(4-hydroxy-3-methoxyphenyl)indolin-2-one	0.999633	0.949525	0.997618	1	0.961807	1	0.571746	1	1	1	1	0.999893	1	1	0.999048
3-((2,4-dimethylphenyl)diazenyl)-4-hydroxy-7-(3-(5-hydroxy-7-sulfo-6-((6-sulfonaphthalen-2-yl)diazenyl)naphthalen-2-yl)ureido)naphthalene-2-sulfonic acid	0.978517	0.796223	0.999996	1	0.981132	1	0.574235	0.999286	1	1	1	0.888148	1	1	0.955553
3-((2,5-dimethylphenyl)diazenyl)-4-hydroxy-7-(3-(5-hydroxy-7-sulfo-6-((6-sulfonaphthalen-2-yl)diazenyl)naphthalen-2-yl)ureido)naphthalene-2-sulfonic acid	0.978517	0.796223	0.999996	1	0.981132	1	0.574235	0.999286	1	1	1	0.888148	1	1	0.955553
3-((2'-(1h-tetrazol-5-yl)biphenyl-4-yl)methyl)-1,4-dibutyl-1h-imidazol-2(3h)-one	1	0.999831	0.999965	1	0.987073	1	0.740262	0.998439	1	1	1	0.999475	1	1	0.999813
3-((2'-(1h-tetrazol-5-yl)biphenyl-4-yl)methyl)-2-butyl-6-(2-methoxypropan-2-yl)quinazolin-4(3h)-one	1	0.999831	0.999965	1	0.987073	1	0.740262	0.998439	1	1	1	0.999475	1	1	0.999813
3-((3-(2-(7-chloroquinolin-2-yl)vinyl)phenyl)(3-(dimethylamino)-3-oxopropylthio)methylthio)propanoic acid	0.03118	0.668072	8.9e-05	0	0.00122	0	0.562468	0	0	0	0	0.001861	0	0	0.011044
3-((4-((4-(4-(4-aminobenzamido)benzamido)-2,5-dimethoxyphenyl)diazenyl)-2,5-dimethylphenyl)diazenyl)naphthalene-1,5-disulfonic acid	0.978517	0.796223	0.999996	1	0.981132	1	0.574235	0.999286	1	1	1	0.888148	1	1	0.955553
3-((4-(1-methyl-4-(pyridin-4-yl)-1h-pyrazol-3-yl)phenoxy)methyl)isoquinoline	0.97248	0.080932	0.851396	1	1	1	0.137506	0.999286	1	1	1	0.576749	1	1	0.800208
3-((4-(2-((3-(1,1,2,2-tetrafluoroethoxy)phenyl)amino)pyrimidin-4-yl)pyridin-2-yl)amino)propan-1-ol	0.78872	0.817295	0.169705	0	0.00122	0	0.391675	0	0	0	0	0.199561	0	1	0.385996
3-((6-(2-(1h-tetrazol-5-yl)phenyl)pyridin-3-yl)methyl)-1,4-dibutyl-1h-imidazol-2(3h)-one	1	0.999831	0.999965	1	0.987073	1	0.740262	0.998439	1	1	1	0.999475	1	1	0.999813
3-((6-(2-(1h-tetrazol-5-yl)phenyl)pyridin-3-yl)methyl)-4-butyl-1-((2r,6s)-2,6-dimethylcyclohexyl)-1h-imidazol-2(3h)-one	1	0.989759	0.999381	1	0.98523	1	0.712621	0.997238	1	1	1	0.999151	1	1	0.999511
3-(2-(6-(cyclopropylamino)-9h-purin-9-yl)vinyl)-4-methyl-n-(4-(trifluoromethyl)pyridin-2-yl)benzamide	0.998761	0.999528	0.999993	1	0.966712	1	0.739547	1	1	1	1	0.999364	1	1	0.999373
3-(2-aminoethyl)-5-(2-methoxybenzylidene)thiazolidine-2,4-dione	0.889857	0.998411	0.999998	1	0.819621	0.996855	0.46091	1	0.996933	1	1	0.999072	0.996855	1	0.962976
3-(2-chloro-4-((3-(2,6-dichlorophenyl)-5-isopropylisoxazol-4-yl)methoxy)styryl)benzoic acid	0.013287	0.763129	0.036814	0	0.00262	0.002169	0.182547	0.004808	0.002169	0	0	0.002958	0.002169	0	0.017686
3-(2-chlorobenzyl)-2,4-dioxo-n-(2-(piperidin-1-yl)ethyl)-1,2,3,4-tetrahydroquinazoline-7-carboxamide	0.006345	0.696685	1.4e-05	0	0.019664	0	0.190509	0.001236	0	0	0	0.014345	0	0	0.006902
3-(2-fluorobenzyl)-2,4-dioxo-n-(2-(piperidin-1-yl)ethyl)-1,2,3,4-tetrahydroquinazoline-7-carboxamide	0.006345	0.696685	1.4e-05	0	0.019664	0	0.190509	0.001236	0	0	0	0.014345	0	0	0.006902
3-(2-hydroxy-2,2-bis-phosphono-ethyl)-1-methyl-pyridinium	0.994189	1	0.989997	1	0.997218	1	0.246059	0.998414	1	1	1	0.994349	1	1	0.992845
3-(2,4-dichlorophenyl)-4-(1-methyl-1h-indol-3-yl)-1h-pyrrole-2,5-dione	0.020127	0.705168	0.000109	0	0.00122	0	0.484042	0	0	0	0	0.0021	0	0	0.007445
3-(3-bromo-4-hydroxy-phenyl)-n-(2-{2-[3-(3-bromo-4-hydroxy-phenyl)-2-hydroxyimino-propionylamino]-ethyldisulfanyl}-ethyl)-2-hydroxyimino-propionamide	0.025683	0.940565	9e-06	0	0.002955	0	0.16676	0	0	0	0	0.00077	0	0	0.00882
3-(3-chloro-4-hydroxyphenylamino)-4-(2-nitrophenyl)-1h-pyrrole-2,5-dione	0.020127	0.705168	0.000109	0	0.00122	0	0.484042	0	0	0	0	0.0021	0	0	0.007445
3-(3-ethoxy-4-hydroxy-5-(phenylthiomethyl)benzylidene)pyrrolidin-2-one	0.999886	0.965455	0.997034	1	0.989207	1	0.668116	0.997625	1	1	1	0.902588	1	1	0.966503
3-(3-fluorobenzyl)-2,4-dioxo-n-(2-(piperidin-1-yl)ethyl)-1,2,3,4-tetrahydroquinazoline-7-carboxamide	0.053068	0.65609	6.7e-05	0	0.00122	0	0.422491	0	0	0	0	0.003654	0	0	0.018929
3-(3-hydroxy-4-methoxyphenyl)-8h-thieno[2,3-b]pyrrolizin-8-one	0.998968	0.913775	0.989959	1	0.999476	1	0.502244	0.999286	1	1	1	0.997337	1	1	0.995421
3-(3,4-dichlorophenyl)-1-(2-(3,5-diphenyl-1h-pyrazol-1-yl)-4-methyl-1,3-thiazol-5-yl)-2-propen-1-one	0.996338	1	0.999484	1	0.989434	1	0.379816	1	1	1	1	1	1	1	0.998607
3-(3,4-dihydroxy-phenyl)-acrylic acid	0.128658	0.162217	0.999669	0	0.502994	1	0.221696	0.999286	1	1	0.3	0.111314	1	1	0.413214
3-(3,5-bis-trifluoromethyl-benzyloxy)-2-phenyl-piperidine	0.999486	0.975321	0.998936	1	0.999476	1	0.62588	0.999286	1	1	1	0.999367	1	1	0.999263
3-(3,5-dibromo-4-hydroxybenzylidene)-5-iodoindolin-2-one	0.461905	0.574125	7.9e-05	0	0.00122	0	0.406237	0	0	0	0	0.003654	0	0	0.155212
3-(4-(2-(6-amino-9-((2r,3r,4s,5s)-5-(ethylcarbamoyl)-3,4-dihydroxytetrahydrofuran-2-yl)-9h-purin-2-ylamino)ethyl)phenyl)propanoic acid	1	0.99997	0.999419	1	0.984723	1	0.885781	0.99728	1	1	1	0.999646	1	1	0.999688
3-(4-chlorobenzyl)-2,4-dioxo-n-(2-(piperidin-1-yl)ethyl)-1,2,3,4-tetrahydroquinazoline-7-carboxamide	0.053068	0.65609	6.7e-05	0	0.00122	0	0.422491	0	0	0	0	0.003654	0	0	0.018929
3-(4-chlorobenzyl)-2,4-dioxo-n-(3-(piperidin-1-yl)propyl)-1,2,3,4-tetrahydroquinazoline-7-carboxamide	0.053068	0.65609	6.7e-05	0	0.00122	0	0.422491	0	0	0	0	0.003654	0	0	0.018929
3-(4-chlorobenzyl)-n-(2-(2-ethylpiperidin-1-yl)ethyl)-2,4-dioxo-1,2,3,4-tetrahydroquinazoline-7-carboxamide	0.053068	0.65609	6.7e-05	0	0.00122	0	0.422491	0	0	0	0	0.003654	0	0	0.018929
3-(4-chlorobenzyl)-n-(2-morpholinoethyl)-2,4-dioxo-1,2,3,4-tetrahydroquinazoline-7-carboxamide	0.006345	0.696685	1.4e-05	0	0.019664	0	0.190509	0.001236	0	0	0	0.014345	0	0	0.006902
3-(4-chlorobenzyl)-n-(3-(2-ethylpiperidin-1-yl)propyl)-2,4-dioxo-1,2,3,4-tetrahydroquinazoline-7-carboxamide	0.053068	0.65609	6.7e-05	0	0.00122	0	0.422491	0	0	0	0	0.003654	0	0	0.018929
3-(4-chlorobenzyl)-n-(3-morpholinopropyl)-2,4-dioxo-1,2,3,4-tetrahydroquinazoline-7-carboxamide	0.006345	0.696685	1.4e-05	0	0.019664	0	0.190509	0.001236	0	0	0	0.014345	0	0	0.006902
3-(4-fluoro-phenyl)-8-methyl-8-aza-bicyclo[3.2.1]octane-2-carboxylic acid methyl ester	0.07959	0	0	0	0.054038	0	0	0	0	0	0	0.000854	0	0	0.026815
3-(4-fluorophenyl)-2,4-dioxo-n-(2-(piperidin-1-yl)ethyl)-1,2,3,4-tetrahydroquinazoline-7-carboxamide	0.006345	0.696685	1.4e-05	0	0.019664	0	0.190509	0.001236	0	0	0	0.014345	0	0	0.006902
3-(4-hydroxy-2-methoxy-5-(2-methylbut-3-en-2-yl)phenyl)-1-(4-hydroxyphenyl)prop-2-en-1-one	0.345266	0.500198	0.001558	0	0.00122	0	0.419822	0	0	0	0	0.0021	0	0	0.116308
3-(4-hydroxy-3,5-bis(methylthiomethyl)benzylidene)indolin-2-one	0.999987	0.999876	0.999962	1	0.999476	1	0.736882	0.999254	1	1	1	0.999543	1	1	0.999831
3-(4-hydroxy-3,5-diisopropylbenzylidene)indolin-2-one	0.042556	0.946613	0.000108	0	0.00122	0	0.656759	0	0	0	0	0.001616	0	0	0.01476
3-(4-imidazol-1-ylmethyl-phenyl)-acrylic acid	5.3e-05	0	3e-06	0	0.057887	0	0	0	0	0	0	0.000987	0	0	0.000348
3-(4-methoxy-2-methylphenyl)-2,5-dimethyl-n-(pentan-3-yl)pyrazolo[1,5-a]pyrimidin-7-amine	0.001997	0.111175	6e-06	0	0.038262	0.001368	0.310797	0.002721	0.001368	0	0	0.001713	0.001368	0	0.001239
3-(4-methoxyphenyl)-2,4-dioxo-n-(2-(piperidin-1-yl)ethyl)-1,2,3,4-tetrahydroquinazoline-7-carboxamide	0.006345	0.696685	1.4e-05	0	0.019664	0	0.190509	0.001236	0	0	0	0.014345	0	0	0.006902
3-(6-(1h-pyrazol-4-yl)benzo[d]thiazol-2-yl)-n-(3-(dimethylamino)propyl)chroman-6-carboxamide	0.999019	0.999594	0.999993	1	0.966712	1	0.743961	1	1	1	1	0.999364	1	1	0.999459
3-(6-acetamidopyridin-3-yl)-n-(2-((2,4-dichloro-3-((2-methylquinolin-8-yloxy)methyl)phenyl)(methyl)amino)-2-oxoethyl)acrylamide	1	0.999999	0.999968	1	0.999353	0.99806	1	1	1	1	1	0.999618	0.99806	1	0.999862
3-(benzyloxy)aniline	0.927462	0.143859	0.999998	1	1	1	0.169548	0.999286	1	1	1	0.897851	1	1	0.941771
3-(furan-2-ylmethyl)-1,8-dimethyl-1h-purine-2,6(3h,7h)-dione	5.5e-05	0.035274	7.1e-05	0	0.056731	0	0.126454	0	0	0	0	0.001646	0	0	0.000591
3-[(2-amino)pyrimidin-4-yl]-4-(1-methylethoxy)-1h-pyrrolo[2,3-b]pyridine	0.00791	0.658501	9.9e-05	0	0.00122	0	0.490014	0	0	0	0	0.0021	0	0	0.00337
3-[(2-amino)pyrimidin-4-yl]-4-(2-methoxyethoxy)-1h-pyrrolo[2,3-b]pyridine	0.006517	0.627923	0.000108	0	0.00122	0	0.479997	0	0	0	0	0.0021	0	0	0.002908
3-[(2-amino)pyrimidin-4-yl]-4-methoxy-1h-pyrrolo[2,3-b]pyridine	0.00791	0.658501	9.9e-05	0	0.00122	0	0.490014	0	0	0	0	0.0021	0	0	0.00337
3-[(2-amino)pyrimidin-4-yl]-4-propoxy-1h-pyrrolo[2,3-b]pyridine	0.00791	0.658501	9.9e-05	0	0.00122	0	0.490014	0	0	0	0	0.0021	0	0	0.00337
3-[(2r)-amino-2-phenylethyl]-1-(2,6-difluorobenzyl)-5-(2-fluoro-3-methoxyphenyl)-6-methylpyrimidin-2,4-dione	0.00018	0.465976	6.3e-05	0	0.00122	0	0.359262	0	0	0	0	0.003654	0	0	0.001299
3-[(4-benzyl-piperazin-1-yl)-(4-tert-butyl-phenyl)-methyl]-phenol	1	0.971166	0.999867	1	0.999476	1	0.669182	0.999286	1	1	1	0.999033	1	1	0.999633
3-[(4-methoxyphenyl)phenylmethyl]indole	0.284095	0.983829	0.325649	0	0.308284	0.001195	0.650323	0.002358	0.001195	0	0.1	0.503038	0.001195	1	0.370927
3-[1-(4-chloro-benzyl)-4-methyl-6-(5-phenyl-pyridin-2-ylmethoxy)-4,5-dihydro-1h-thiopyrano[2,3,4-cd]indol-2-yl]-2,2-dimethyl-propionic acid	0.23649	0	7e-06	0	0.036665	0	0	0	0	1	0.2	0.001498	0	0	0.079332
3-[1-(4-dimethylamino-phenyl)-meth-(e)-ylidene]-1,3-dihydro-indol-2-one	0.711194	0.925449	0.047931	0	0.00122	0	0.582448	0.999286	0	0	0.1	0.301996	0	0	0.353707
3-[1-(5-hydroxymethyl-3-methyl-1h-pyrrol-2-yl)-meth-(z)-ylidene]-1,3-dihydro-indol-2-one	0.998955	0.995506	1	1	0.992241	1	0.79313	1	1	1	1	0.999441	1	1	0.999465
3-[2-(1-benzyl-piperidin-4-yl)-ethyl]-5,7-dihydro-isoxazolo[4,5-f]indol-6-one	0.997479	0.513153	0.999847	1	0.993189	1	0.606079	1	1	1	1	0.997794	1	1	0.998373
3-[2-(2-amino-5-guanidino-pentanoylamino)-acetylamino]-n-[1-carbamoyl-2-(4-methoxy-phenyl)-ethyl]-succinamic acid (sc-46749)	0.267014	0.390817	0.000325	0	0.00122	0	0.354598	0	0	0	0	0.003654	0	0	0.090331
3-[3-(3-chloro-4-cyanophenyl)-5,5-dimethyl-4-oxo-2-thioxoimidazolidin-1-yl]propane-1-sulfonamide	0.799438	0.999876	0.478896	0	0.757728	1	0.903423	0	1	1	0.6	0.799179	1	1	0.692504
3-[3-(4-carbamimidoyl-phenylcarbamoyl)-propionylamino]-pent-4-ynoic acid (sc-54701a)	0.000542	0.103364	2.1e-05	0	0.03229	0	0.392594	0	0	0	0	0.0013	0	0	0.000621
3-[3-methyl-1-(3-methyl-butylcarbamoyl)-butylcarbamoyl]-oxirane-2-carboxylic acid ethyl ester	0.339596	0.54527	7.9e-05	0	0.00122	0	0.416086	0	0	0	0	0.003654	0	0	0.114443
3-[4-(2-ethyl-57-dimethyl-imidazo[45-b]pyridin-3-ylmethyl)-phenyl]-5-isobutyl-thiophene-2-sulfonic acid butyloxycarbonylamide(l-162313)	1	0.999769	0.999963	1	0.984826	1	0.717874	0.998403	1	1	1	0.999438	1	1	0.9998
3-[4-(2,4-bis-trifluoromethyl-benzyloxy)-3-methoxy-phenyl]-2-cyano-n-(5-trifluoromethyl-[1,3,4]thiadiazol-2-yl)-acrylamide	0.005726	0.102552	0.001566	0	0.002994	0	0.137391	0	0	0	0	0.003243	0	0	0.003512
3-[4-(4-chloro-phenyl)-piperazin-1-ylmethyl]-1h-pyrrolo[2,3-b]pyridine (l-745870)	0.991838	0.984071	0.99679	1	1	1	0.650583	0.999286	1	1	0.9	0.999476	1	1	0.996034
3-[4-(4-methyl-piperazin-1-yl)-benzoylamino]-4,6-dihydro-1h-pyrrolo[3,4-c]pyrazole-5-carboxylic acid (2,6-diethyl-phenyl)-amide	0.99994	0.931351	0.9974	1	0.999476	1	0.556664	0.999286	1	1	1	0.999033	1	1	0.998791
3-[4-di(4-hydroxy-2-oxo-2h-3-chromenyl)methylphenyl(4-hydroxy-2-oxo-2h-3-chromenyl)methyl]-4-hydroxy-2h-2-chromenone	0.998584	0.521479	1	1	1	1	0.286368	0.997765	1	1	1	0.999479	1	1	0.999354
3-[5-(2-dimethylamino-ethylsulfanyl)-thiophen-2-ylmethylene]-6-[1-phenyl-meth-(z)-ylidene]-piperazine-2,5-dione	0.15025	0.028597	0.997967	1	1	1	0.410963	0	1	1	0.6	0.903791	1	1	0.684002
3-[5-(3,5-difluorophenyl)-3-({[(1s,3r)-3-fluorocyclopentyl]amino}-methyl)-4-methyl-1h-pyrazol-1-yl]propanenitrile	1	0.974195	0.999632	1	0.999476	1	0.653859	0.999286	1	1	1	0.999033	1	1	0.999555
3-[5-(4-chloro-phenyl)-1-(4-methoxy-phenyl)-1h-pyrazol-3-yl]-n-hydroxy-n-methyl-propionamide	0.012883	0.894923	0.009021	0	0.00122	0	0.49062	0	0	0	0	0.001633	0	0	0.007846
3-{(r)-7-[3-(2-cyclopropylmethyl-3-methoxy-4-methylcarbamoyl-phenoxy)-propoxy]-8-propyl-chroman-2-yl}-propionic acid	1	0.954355	0.999919	1	0.970531	1	0.508528	1	1	1	1	0.999884	1	1	0.999934
3-{(s)-2-(2-carboxy-ethyl)-7-[3-(2-cyclopropylmethyl-3-methoxy-4-methylcarbamoyl-phenoxy)-propoxy]-chroman-8-yl}-propionic acid	1	0.999973	0.999521	1	0.90677	1	0.771498	1	1	1	1	0.999547	1	1	0.999689
3-{[3-oxo-2-(2-piperidin-4-yl-ethyl)-2,3-dihydro-1h-isoindole-5-carbonyl]-amino}-2-(pyridine-3-sulfonylamino)-propionic acid(l-746233)	0.267014	0.390817	0.000325	0	0.00122	0	0.354598	0	0	0	0	0.003654	0	0	0.090331
3-{[3-oxo-2-(2-piperidin-4-yl-ethyl)-2,3-dihydro-1h-isoindole-5-carbonyl]-amino}-propionic acid(l-709780)	0.474915	0.473555	0.002928	0	0.00122	0	0.411584	0	0	0	0	0.10115	0	0	0.192998
3-{[5-(2-piperidin-4-yl-ethyl)-thieno[2,3-b]thiophene-2-carbonyl]-amino}-2-(pyridine-3-sulfonylamino)-propionic acid(l-739758)	0.267014	0.390817	0.000325	0	0.00122	0	0.354598	0	0	0	0	0.003654	0	0	0.090331
3-{2-[2-benzyl-4-(4-methylamino-piperidin-1-yl)-4-oxo-butyrylamino]-3-methylsulfanyl-propionylamino}-4-cyclohexyl-2-hydroxy-butyric acid isopropyl ester(cp-108,671)	0.921542	0.030615	0.997929	1	1	1	0.356023	0.999286	1	1	1	0.997541	1	1	0.972337
3-{2-[hydroxy-(2-methoxy-3-octadecylcarbamoyloxy-propoxy)-phosphoryloxy]-ethyl}-thiazol-3-ium(cv-3988)	1	0.999991	0.998177	1	0.996214	1	0.991901	1	1	1	1	0.999498	1	1	0.999225
3-{2-butyl-4-oxo-3-[2'-(2h-tetrazol-5-yl)-biphenyl-4-ylmethyl]-3,4-dihydro-quinazolin-6-yl}-1-isopropyl-1-methyl-urea	1	0.999769	0.999963	1	0.984826	1	0.717874	0.998403	1	1	1	0.999438	1	1	0.9998
3-{3-(2-carboxy-ethyl)-4-[6-(4-methoxy-phenyl)-hex-5-enyloxy]-benzoyl}-benzoic acid (bt223982)	1	0.999973	0.999521	1	0.90677	1	0.771498	1	1	1	1	0.999547	1	1	0.999689
3-{3-[1-(4-carbamimidoyl-phenyl)-2-oxo-pyrrolidin-3-yl]-ureido}-propionic acid ethyl ester (sc-57099b (orbofiban))	0.262117	0.122948	0.000186	0	0.055778	0.003466	0.384575	0.001529	0	0	0	0.003757	0.003466	0	0.088687
3-{4-[(benzyl-methyl-amino)-methyl]-phenyl}-6,7-dimethoxy-chromen-2-one	0.997479	0.513153	0.999847	1	0.993189	1	0.606079	1	1	1	1	0.997794	1	1	0.998373
3-{4-[2-(3-chloro-phenylamino)-pyrimidin-4-yl]-pyridin-2-ylamino}-propan-1-ol	0.999378	0.915614	0.99647	1	0.966712	1	0.549381	1	1	1	1	0.999213	1	1	0.998353
3-{7-[3-(2-cyclopropylmethyl-3-methoxy-4-methylcarbamoyl-phenoxy)-propoxy]-8-propyl-chroman-2-yl}-propionic acid	1	0.999973	0.999521	1	0.90677	1	0.771498	1	1	1	1	0.999547	1	1	0.999689
3-adamantan-1-yl-6,7,8,9-tetrahydro-5h-[1,2,4]triazolo[4,3-a]azepine	0.04521	0.653827	0.000335	0	0.481132	0	0.64753	0	0.017143	0	0	0	0	0	0.015182
3-amino-3-methyl-n-{(r)-2-oxo-1-[2'-(1h-tetrazol-5-yl)-biphenyl-4-ylmethyl]-2,3,4,5-tetrahydro-1h-benzo[b]azepin-3-yl}-butyramide	1	0.973124	0.999868	1	0.999476	1	0.683573	0.999286	1	1	1	0.999033	1	1	0.999634
3-amino-5-(thiophen-3-yl)thiophene-2-carboxamide	0.982716	0.967977	0.757342	1	0.999476	1	0.696214	0.999286	1	1	1	0.899687	1	0	0.879915
3-apmpa (cgp-35024)	0.094117	0.64007	0.150908	0	0.00122	0	0.477704	0	0	0	0.1	0.030012	0	0	0.091679
3-chloro-2-methyl-n-(4-(2-(4-methylpiperazin-1-yl)-2-oxoethyl)thiazol-2-yl)benzenesulfonamide	0.06167	0.662368	0.000412	0	0.481132	0	0.652526	0	0.017143	0	0	0.299099	0	0	0.120394
3-chloro-3-(3,4-dimethoxyphenyl)-2-(3,4,5-trimethoxyphenyl)acrylaldehyde	0.996338	1	0.999484	1	0.989434	1	0.379816	1	1	1	1	1	1	1	0.998607
3-cyclopentylmethyl-n-hydroxy-4-(4-oxo-piperidin-1-yl)-2-(3,4,4-trimethyl-2,5-dioxo-imidazolidin-1-ylmethyl)-butyramide	0.917084	0.293685	0.900728	1	0.806731	0	0.555004	1	0	1	0.3	0.598221	0	1	0.805345
3-cyclopropylmethoxy-4-(4-methanesulfonyl-phenyl)-5,5-dimethyl-5h-furan-2-one	1	0.999999	1	1	0.999423	1	1	0.997706	1	1	1	0.999818	1	1	0.999939
3-ethyl-1-(3-nitro-phenyl)-1h-quinazoline-2,4-dione(nitraquazone)	0.145502	0.075649	0.017503	0	0.017182	0	0.013901	0	0	0	0.1	0.499914	0	0	0.220973
3-ethyl-5-(5-(4-ethylpiperazin-1-ylsulfonyl)-2-propoxypyridin-3-yl)-2-(pyridin-2-ylmethyl)-2h-pyrazolo[4,3-d]pyrimidin-7(6h)-one	0.020464	0	4.7e-05	0	0.05227	0	0	0	0	0	0	0.000127	0	0	0.006879
3-fluoro-n-(6,7-dimethoxy-2,4-dihydroindeno[1,2-c]pyrazol-3-yl)phenylamine	1	0.968577	0.999894	1	0.999476	1	0.592069	0.999286	1	1	1	0.999033	1	1	0.999642
3-furan-2-ylmethyl-6,11-dimethyl-1,2,3,4,5,6-hexahydro-2,6-methano-benzo[d]azocin-8-ol	1	0.971166	0.999867	1	0.999476	1	0.669182	0.999286	1	1	1	0.999033	1	1	0.999633
3-hydroxy-2-phenylquinoline-4-carboxylic acid	0.076201	0	0.997372	0	0	0	0	0.002606	0	0	0	0.2	0	1	0.424524
3-hydroxy-3-methyl-pentanedioic acid	0.971796	0.715312	0.999985	1	0.961155	1	0.127673	0.998035	1	1	1	0.999533	1	1	0.990438
3-methyl-5-((s)-1-methyl-pyrrolidin-2-yl)-isoxazole	0.008155	0.097849	0.000224	0	0	0	0.155097	0	0	0	0	0.003243	0	0	0.003874
3-o-beta-dglucopyranosyl-(1-2)-alpha-l-rhamnopyranosyl-(1-6)-beta-d-glucopyranosyl-(1-3)-[(2-o-isoferuloyl)-beta-d-glucopyranosyl]-(1-4)-beta-d-glucopyranosyl-(1-4)-beta-d-ribopyranosyl-(1-3)-alpha-lrhamnopyranosyl-(1-2)-alpha-l-arabinopyranosyl hederagenin28-o-alpha-l-rhamnopyranosyl-(1-4)-beta-d-glucopyranosyl-(1-6)-beta-d-glucopyranoside	0.029721	0.725288	7.8e-05	0	0.114641	0	0.650326	0	0	0	0	0.001277	0	0	0.010359
3-p-tolyl-5h-indeno[1,2-c]pyridazin-5-one	0.91291	0.636772	0.999484	1	0.807659	1	0.445511	1	1	1	0.8	0.991292	1	1	0.967895
3-phenoxybenzoic acid	0.905185	0.026104	0.997963	1	1	1	0.380321	0.999286	1	1	1	0.997541	1	1	0.966896
3-phenyl-1h-benzofuro[3,2-c]pyrazole	1	0.985926	0.999943	1	0.999476	1	0.691338	0.999286	1	1	1	0.999033	1	1	0.999659
3-phenyl-2-[1-pyridin-4-yl-meth-(z)-ylidene]-indan-1-one	6.1e-05	0.895699	1e-06	0	0.002283	0	0.214624	0.001321	0	0	0	0.001005	0	0	0.000355
3-phenylamino benzoic acid	0.905185	0.026104	0.997963	1	1	1	0.380321	0.999286	1	1	1	0.997541	1	1	0.966896
3,14-didehydroginkgolide a	0.008067	0.619341	5.2e-05	0	0.028925	0	0.157951	0.001486	0	0	0	0.001592	0	0	0.003237
3,20-dioxopregn-4-en-21-yl 4-bromobenzenesulfonate	0.334531	0.748049	0.028754	0	0.00122	0	0.565525	0	0	0	0	0.222561	0	0	0.195282
3,4-dichloro-5-(2-((4-methoxyphenyl)(phenyl)methylene)hydrazinyl)pyridazine	6.1e-05	0.895699	1e-06	0	0.002283	0	0.214624	0.001321	0	0	0	0.001005	0	0	0.000355
3,4-dihydro-9-methoxy-[1]benzothieno[2,3-f]-1,4-thiazepin-5(2h)-one	0.999993	0.951442	0.999683	1	0.966712	1	0.598895	1	1	1	1	0.998425	1	1	0.999367
3,4-dihydroxy-5-nitrobenzaldehyde (rat)	0.201687	0.100888	0.001141	0	0	0	0.135971	0	0	0	0	0.002044	0	0	0.06829
3,4,5-trihydroxy-benzoic acid (2s,3r)-2-(3,4-dihydroxy-phenyl)-5,7-dihydroxy-chroman-3-yl ester	0.246317	0.07569	6e-05	0	0.051587	0.013889	0.158422	0.020408	0.017143	0	0	0.005577	0.013889	0	0.083984
3,4,6,8-tetrabromo-dibenzo[1,4]dioxin-1-ol	0.982527	0.077578	0.999997	1	1	1	0.089285	0.999286	1	1	1	0.996794	1	1	0.993106
3,5-dichloro-4-[(8-methoxy-2-trifluoromethyl-quinoline-5-carbonyl)-amino]-1-oxo-1,2-dihydro-pyridinium	0.145502	0.075649	0.017503	0	0.017182	0	0.013901	0	0	0	0.1	0.499914	0	0	0.220973
3,5,7,2',4'-pentahydroxyflavone	0.01593	0.209594	8e-05	0	0.02	0	0.420697	0	0	0	0	0.003654	0	0	0.006554
3,5b,5e-trihydroxy-(5br,5es)-spiro[1,4,5b,5e-tetrahydronaphtho[4a,8a-b]oxirene-1,2'-naphtho[1,8-de][1,3]dioxine]-4-one	0.054492	0.155768	6e-05	0	0.051587	0.013889	0.345463	0.020408	0.017143	0	0	0.0021	0.013889	0	0.018884
3'-carbamoylbiphenyl-3-yl cyclohexylcarbamate	0.373377	0.079794	0.89779	1	1	1	0.245342	0.999286	1	1	0.7	0.856144	1	1	0.709103
31-demethylbuxaminol	0.997365	0.375522	0.998594	1	1	1	0.445619	0.999286	1	1	1	0.993723	1	1	0.996561
3b',4'-dihydroxyspiro[naphtho[1,8-de][1,3]dioxine-2,2'-(1a',2',3b',3e',4',4a'-hexahydrooxireno[2',3':6,7]naphtho[4a,8a-b]oxirene)]-3e'-one	0.997033	0.363405	0.999997	1	1	1	0.400818	0.999286	1	1	1	0.995027	1	1	0.997353
3beta-(4-chlorophenyl)-2beta-(5-phenylthiazol-2-yl)-tropane	0.07959	0	0	0	0.054038	0	0	0	0	0	0	0.000854	0	0	0.026815
3n-[7,7-dimethyl-1-spiro[2,3-dihydro-1h-indene-1,4'-(hexahydropyridine)]-1-ylsulfonylmethylbicyclo[2.2.1]hept-2-yl]hexahydro-3-pyridinecarboxamide	1	0.995732	0.999419	1	0.956845	1	0.576725	1	1	1	1	0.999312	1	1	0.999577
4-((2-hydroxy-5-(2-phenylvinyl)phenyl)diazenyl)benzenecarboximidamide	0.201789	0.100888	0.001143	0	0	0	0.135976	0	0	0	0	0.002044	0	0	0.068325
4-((4-(amino(imino)methyl)phenyl)diazenyl)-3-hydroxy-n-phenyl-2-naphthamide	0.201789	0.100888	0.001143	0	0	0	0.135976	0	0	0	0	0.002044	0	0	0.068325
4-((4-bromobenzyl)-[1,2,4]-triazol-4-ylamino)benzonitrile	6.1e-05	0.895699	1e-06	0	0.002283	0	0.214624	0.001321	0	0	0	0.001005	0	0	0.000355
4-((s)-amino-carboxy-methyl)-3-methyl-benzoic acid	1	0.999998	1	1	0.98103	1	0.996005	0.999264	1	1	1	0.999903	1	1	0.999968
4-({1-[(s)-2-(indan-5-yloxycarbonyl)-3-(2-methoxy-ethoxy)-propyl]-cyclopentanecarbonyl}-amino)-cyclohexanecarboxylic acid	0.956888	0.99953	0.99637	1	0.971101	0.996753	0.12752	0.999325	0.996753	1	1	0.99875	0.996753	1	0.984003
4-(1-(4-(2-(dimethylamino)ethoxy)phenyl)-5-hydroxy-2-phenylpent-1-enyl)phenol	0.008821	0.997957	0.000194	0	0.023149	0	0.695548	0	0	0	0	0.000212	0	0	0.003076
4-(1-(cyclopropylmethyl)-4-(4-fluorophenyl)-1h-imidazol-5-yl)pyridine	0.998594	0.914942	0.982896	1	0.999476	1	0.508371	0.999286	1	1	1	0.679398	1	1	0.886963
4-(1-amino-ethyl)-cyclohexanecarboxylic acid pyridin-4-ylamide	0.999972	0.989483	0.999985	1	0.999476	1	0.726983	0.999286	1	1	1	0.999033	1	1	0.999664
4-(1-methyl-2-(piperidin-4-yl)-4-(3-(trifluoromethyl)phenyl)-1h-imidazol-5-yl)-n-((r)-1-phenylethyl)pyridin-2-amine	0.99944	0.9252	0.990041	1	0.999476	1	0.533516	0.999286	1	1	1	0.999033	1	1	0.996171
4-(2-(4-amino-1,2,5-oxadiazol-3-yl)-1-ethyl-7-{[(3s)-3-piperidinylmethyl]oxy}-1h-imidazo[4,5-c]pyridin-4-yl)-2-methyl-3-butyn-2-ol	1	0.976982	0.999872	1	0.999476	1	0.682777	0.999286	1	1	1	0.999033	1	1	0.999635
4-(2-(4-chloro-1h-pyrazol-1-yl)ethylamino)-3-(6-(1-(3-fluoropropyl)piperidin-4-yl)-4-methyl-1h-bendo[d]imidazol-2-yl)pyridine-1-(1h)-one	1	0.973456	0.999733	1	0.999476	1	0.675706	0.999286	1	1	1	0.999033	1	1	0.999589
4-(2-chloroethyl)-2-phenyl-1,2,4-thiadiazolidine-3,5-dione	1	0.958407	0.999384	1	0.999476	1	0.612627	0.999286	1	1	1	0.999033	1	1	0.999472
4-(2-methyl-4-phenyl-oxazol-5-yl)-pyridine	0.982572	0.86668	0.760583	1	0.519982	1	0.499286	1	1	1	0.8	0.500118	1	1	0.747758
4-(3-(1-benzhydryl-5-chloro-2-(2-((2,6-dimethylphenyl)methylsulfonamido)ethyl)-1h-indol-3-yl)propyl)benzoic acid	0.26725	0.504139	0.033666	0	0.290235	0	0.767279	0	0.013699	0	0	0.000772	0	0	0.100563
4-(3-(3,5-dioxopiperazin-1-yl)butan-2-yl)piperazine-2,6-dione	0.24475	0.999837	0.68268	0	0.215432	0	0.838174	0.030303	1	0	0.5	0.5	0	1	0.47581
4-(3-(4-decylphenoxy)-2-oxopropoxy)benzoic acid	0.144581	0.531206	0.349655	0	0.00122	0	0.411767	0	0	0	0.1	0.000466	0	0	0.164901
4-(3-(cyclopentyloxy)-4-methoxyphenyl)pyrrolidin-2-one	0.982916	0.772946	0.999535	1	0.938106	1	0.493611	1	1	1	1	0.997794	1	1	0.993415
4-(3-{ethyl-[3-(propane-1-sulfinyl)-propyl]-amino}-2-hydroxy-propoxy)-benzonitrile	0.976243	0.983175	0.98366	1	1	1	0.645515	0.999286	1	1	1	0.899476	1	1	0.953126
4-(3-butyl-4-methoxy-benzyl)-imidazolidin-2-one	0.882959	0.204802	0.997649	1	1	1	0.342552	0.999286	1	1	1	0.608268	1	1	0.829625
4-(3-hexyl-2-oxo-2,3-dihydro-imidazol-1-yl)-n-{4-[2-((r)-2-hydroxy-2-pyridin-3-yl-ethylamino)-ethyl]-phenyl}-benzenesulfonamide	1	0.996144	0.999509	1	0.948867	1	0.621256	0.997155	1	1	1	0.99981	1	1	0.999773
4-(4-(4-(chlorodifluoromethoxy)phenylamino)phthalazin-1-yl)benzamide	0.998955	0.995506	1	1	0.992241	1	0.79313	1	1	1	1	0.999441	1	1	0.999465
4-(4-(4-fluorophenyl)-1-(3-phenylpropyl)-5-(pyridin-4-yl)-1h-imidazol-2-yl)but-3-yn-1-ol	0.999188	0.918861	0.988453	1	0.999476	1	0.519919	0.999286	1	1	1	0.977004	1	1	0.988215
4-(4-(4-fluorophenyl)-5-(pyridin-4-yl)-1h-imidazol-2(3h)-ylidene)cyclohexa-2,5-dienone	0.045911	0.683841	7.2e-05	0	0.00122	0	0.410951	0	0	0	0	0.003654	0	0	0.016545
4-(4-benzhydryloxy-piperidin-1-yl)-1-(4-tert-butyl-phenyl)-butan-1-one	0.426977	0.889567	0.000861	0	0.00122	0	0.536257	0.999286	0	0	0	0.003243	0	0	0.143694
4-(4-benzo[1,3]dioxol-5-yl-5-pyridin-2-yl-1h-imidazol-2-yl)-benzamide	0.95321	0.850755	0.494224	1	0.5	0	0.415903	0	0	0	0.1	0.200711	0	1	0.549381
4-(4-cyclohexyl-2-methyl-oxazol-5-yl)-2-fluoro-benzenesulfonamide	0.11457	0.999804	0.000434	0	0.033704	0	0.79768	0	0	0	0	0.00356	0	0	0.039521
4-(4-ethyl-2-(4-methoxyphenyl)-1h-imidazol-5-yl)pyridine	0.95321	0.850755	0.494224	1	0.5	0	0.415903	0	0	0	0.1	0.200711	0	1	0.549381
4-(4-fluoronaphthalen-1-yl)-6-isopropylpyrimidin-2-amine	1	0.952796	0.999868	1	0.999476	1	0.575101	0.999286	1	1	1	0.999033	1	1	0.999634
4-(4-hydroxybenzyl)-7-methoxyisoquinolin-8-ol	6.1e-05	0.895699	1e-06	0	0.002283	0	0.214624	0.001321	0	0	0	0.001005	0	0	0.000355
4-(4,5-dibromo-1h-pyrrol-2-yl)-1h-imidazo[4,5-c]pyridin-2-amine	0.999393	0.452394	0.999582	1	1	1	0.473464	0.999286	1	1	1	0.995262	1	1	0.998079
4-(4'-chloro-biphenyl-4-yl)-4-oxo-2-phenylsulfanylmethyl-butyric acid(bay-129566)	0.999947	0.540081	0.99998	1	0.931204	1	0.743512	0.998579	1	1	1	0.998278	1	1	0.999402
4-(5-(4-chlorophenyl)-2-methyl-3-propionyl-1h-pyrrol-1-yl)-benzenesulfonamide	0.000204	0.724958	1e-06	0	0.022945	0	0.166177	0.001508	0	0	0	0.00245	0	0	0.000885
4-(5-(4-chlorophenyl)-4-(pyridin-3-yl)-1h-imidazol-2-yl)phenol	6.1e-05	0.895699	1e-06	0	0.002283	0	0.214624	0.001321	0	0	0	0.001005	0	0	0.000355
4-(5-amino-1-(2,6-difluorobenzoyl)-1h-1,2,4-triazol-3-ylamino)benzenesulfonamide	0.089623	0.842445	8.6e-05	0	0.00122	0	0.491648	0	0	0	0	0.003654	0	0	0.031121
4-(5-methyloxazolo[4,5-b]pyridin-2-yl)-1,4-diazabicyclo[3.2.2]-nonane	0.006748	0.068888	0.000166	0	0.022727	0	0.124317	0.001335	0	0	0	0.001235	0	0	0.002716
4-(5,6,7,8-tetrahydroimidazo[1,5-a]pyridin-5-yl)benzonitrile	0.000258	0.126312	0.00011	0	0.002994	0	0.203996	0	0	0	0	0.003654	0	0	0.001341
4-(6,7-dimethoxy-quinoxalin-2-ylamino)-cyclohexanol	0.999998	0.989558	0.999951	1	0.999476	1	0.719916	0.999286	1	1	1	0.999033	1	1	0.999661
4-(bis(2-methoxyethyl)amino)-2,7-dimethyl-8-(2-methyl-4-methoxyphenyl)[1,5-a]pyrazolo-1,3,5-triazine	0.001997	0.111175	6e-06	0	0.038262	0.001368	0.310797	0.002721	0.001368	0	0	0.001713	0.001368	0	0.001239
4-(hydroxymethyl)-2-palmitoylcyclopentane-1,3-dione	0.601261	0.468747	0.001381	0	0.00122	0	0.409644	0	0	0	0	0.1021	0	0	0.234914
4-(n-(4-chlorophenethyl)benzo[b]thiophene-3-carboxamido)-n-(2,4-difluorophenyl)piperidine-1-carboxamide	1	0.961418	0.999833	1	0.966712	1	0.54257	1	1	1	1	0.999213	1	1	0.999682
4-[(1r,2s)-3-(4-benzyl-piperidin-1-yl)-1-hydroxy-2-methyl-propyl]-phenol	0.015392	0.602622	0.001863	0	0.00122	0	0.437246	0	0	0	0	0.0021	0	0	0.006452
4-[(2,4-dichloro-5-methoxyphenyl)amino]-6-methoxy-7-[4-(4-methylpiperazin-1-yl)but-1-ynyl]-3-quinolinecarbonitrile	1	0.982051	0.999955	1	0.985341	1	0.711149	0.999283	1	1	1	0.999876	1	1	0.999943
4-[(2,4-dichloro-5-methoxyphenyl)amino]-6-methoxy-7-{5-[(4-methylpiperazin-1-yl)methyl]-3-furyl}-3-quinolinecarbonitrile	0.999987	0.991305	0.999974	1	0.999476	1	0.733619	0.999286	1	1	1	0.999033	1	1	0.999664
4-[(3-bromophenyl)amino]-6,7-dimethoxyquinazoline	0.444272	0.92623	0.412729	0	0.452381	0	0.603721	0.020408	0	0	0	0.188781	0	1	0.348594
4-[(4'-chloro-2'-fluoro)phenylamino]-6,7-dimethoxyquinazoline	0.999963	0.993511	0.999988	1	0.999476	1	0.759973	0.999286	1	1	1	0.999033	1	1	0.999661
4-[(7-oxo-6,7-dihydro-thiazolo[5,4-e]indol-8-ylidenemethyl)-amino]-n-pyridin-2-yl-benzenesulfonamide	0.035813	0.787782	7e-05	0	0.00122	0	0.536062	0	0	0	0	0.003654	0	0	0.013179
4-[(r)-((2s,5r)-4-allyl-2,5-dimethyl-piperazin-1-yl)-(3-methoxy-phenyl)-methyl]-n,n-diethyl-benzamide	1	0.983954	0.999984	1	0.954298	1	0.673481	0.999263	1	1	1	0.999275	1	1	0.999753
4-[(r)-2-((1s,3s,5s)-3,5-dimethyl-2-oxo-cyclohexyl)-2-hydroxy-ethyl]-piperidine-2,6-dione	0.576209	0.150436	0.999998	0	1	1	0.179928	0.999286	1	1	0.9	0.896858	1	1	0.824355
4-[(s)-2-(3-chloro-phenyl)-2-hydroxy-ethylamino]-3-(4-methyl-6-morpholin-4-yl-1h-benzoimidazol-2-yl)-1h-pyridin-2-one	0.063553	0.744937	0.000264	0	0.03229	0	0.537357	0	0	0	0	0.000598	0	0	0.021471
4-[[3-(1,4-diazepane-1-carbonyl)-4-fluorophenyl]methyl]-2hphthalazin-1-one	0.999579	0.781942	0.999978	1	0.912073	1	0.647828	1	1	1	1	0.997794	1	1	0.999117
4-[1-allyl-7-(trifluoromethyl)-1H-indazol-3-yl]benzene-1,3-diol	0.476708	0.895928	0.02645	0	0.155068	0	0.676082	0	0	0	0	0	0	0	0.167719
4-[2-(3,4-dichloro-phenyl)-acetyl]-3-pyrrolidin-1-ylmethyl-piperazine-1-carboxylic acid methyl ester(gr89696)	1	0.971093	0.999873	1	0.999476	1	0.669618	0.999286	1	1	1	0.999033	1	1	0.999635
4-[2-(4-benzyl-piperidin-1-yl)-1-hydroxy-propyl]-phenol	1	0.968694	0.99969	1	0.999476	1	0.620377	0.999286	1	1	1	0.999033	1	1	0.999574
4-[2-(4-fluoro-phenyl)-vinyl]-2,6-dimethyl-phenol	0.76441	0.475381	0.940131	1	0.00122	0	0.344183	0	0	0	0	0.399194	0	0	0.701245
4-[3-(3-{[bis-(4-isobutyl-phenyl)-methyl]-amino}-benzoyl)-indol-1-yl]-butyric acid	0.680447	0.04891	0.997011	1	1	1	0.30899	0.999286	1	1	1	0.997541	1	1	0.891666
4-[3-(3-cyclopentyl-propyl)-2-oxo-imidazolidin-1-yl]-n-{4-[2-((r)-2-hydroxy-2-pyridin-3-yl-ethylamino)-ethyl]-phenyl}-benzenesulfonamide	1	0.996144	0.999509	1	0.948867	1	0.621256	0.997155	1	1	1	0.99981	1	1	0.999773
4-[3-difluoromethyl-5-(3-fluoro-4-methoxy-phenyl)-pyrazol-1-yl]-benzenesulfonamide	0.01883	0.843215	0.001955	0	0.075787	0	0.733055	0	0	0	0	0.001399	0	0	0.007395
4-[4-(4-chloro-3-trifluoromethyl-phenyl)-4-hydroxy-piperidin-1-yl]-n,n-dimethyl-2,2-diphenyl-butyramide	0.987588	0.984249	0.999999	1	0.746603	1	0.904555	0.998594	1	1	1	0.999902	1	1	0.99583
4-[4-(4-CHLORO-PHENOXY)-BENZENESULFONYLMETHYL]-TETRAHYDRO-PYRAN-4-CARBOXYLIC ACID HYDROXYAMIDE	0.791936	0.382773	0.96372	1	0.5	1	0.431407	0.999286	1	1	0.6	0.476556	1	1	0.744071
4-[5-(4-chloro-phenyl)-3-trifluoromethyl-pyrazol-1-yl]-benzenesulfonamide	1	0.999999	1	1	0.999423	1	1	0.997706	1	1	1	0.999818	1	1	0.999939
4-[5-(4-fluoro-phenyl)-2-(4-methanesulfinyl-benzylsulfanyl)-1h-imidazol-4-yl]-pyridine	0.998594	0.914942	0.982896	1	0.999476	1	0.508371	0.999286	1	1	1	0.679398	1	1	0.886963
4-[5-(4-FLUORO-PHENYL)-2-(4-METHANESULFINYL-PHENYL)-3H-IMIDAZOL-4-YL]-PYRIDINE	0.010318	0.402294	2.8e-05	0	0.03229	0	0.476307	0	0	0	0	0.0013	0	0	0.003882
4-[5-(4-fluoro-phenyl)-2-(4-nitro-phenyl)-3h-imidazol-4-yl]-pyridine	0.857805	0.237391	0.892536	1	0.928571	1	0.011109	1	1	1	1	0.996546	1	1	0.915629
4-[5-(4-fluoro-phenyl)-2-methylsulfanyl-3h-imidazol-4-yl]-pyridine	0.998594	0.914942	0.982896	1	0.999476	1	0.508371	0.999286	1	1	1	0.679398	1	1	0.886963
4-[5-(4-fluoro-phenyl)-3-piperidin-4-yl-3h-imidazol-4-yl]-2-methoxy-pyrimidine	0.014345	0.530609	3.7e-05	0	0.304781	0	0.660473	0	0	0	0	0.0013	0	0	0.005227
4-[7,12,17-tris(4-sulfophenyl)-21,22,23,24-tetraazapentacyclo[16.2.1.1^{3,6}.1^{8,11}.1^{13,16}]tetracosa-1,3(24),4,6,8,10,12,14,16(22),17,19-undecaen-2-yl]benzene-1-sulfonic acid	0.978517	0.796223	0.999996	1	0.981132	1	0.574235	0.999286	1	1	1	0.888148	1	1	0.955553
4-{2-(3,4-bis-difluoromethoxy-phenyl)-2-[4-(2,2,2-trifluoro-1-hydroxy-1-trifluoromethyl-ethyl)-phenyl]-ethyl}-3-methyl-pyridin-1-ol anion	0.998347	0.715446	0.999938	1	1	1	0.691521	0.999286	1	1	1	0.995551	1	1	0.997945
4-{2-chloro-1-[4-(2-diethylamino-ethoxy)-phenyl]-2-phenyl-vinyl}-2-methoxy-phenol	0.476708	0.895928	0.02645	0	0.155068	0	0.676082	0	0	0	0	0	0	0	0.167719
4-{3-[4-(4-fluoro-phenyl)-5-pyridin-4-yl-imidazol-1-yl]-propyl}-morpholine	0.998594	0.914942	0.982896	1	0.999476	1	0.508371	0.999286	1	1	1	0.679398	1	1	0.886963
4-{4-[3-(pyridin-2-yl)-1h-pyrazol-4-yl]-pyridin-2-yl}-n-(tetrahydro-2h-pyran-4-yl)benzamide	0.13598	0.275101	5.1e-05	0	0.03229	0	0.537818	0	0	0	0	0.0013	0	0	0.045777
4-{5-[4-(3-chloro-phenyl)-3-oxo-piperazin-1-ylmethyl]-imidazol-1-ylmethyl}-benzonitrile	0.958387	1	0.999999	1	1	1	0.710103	1	1	1	1	1	1	1	0.986129
4-amino-6-((4'-((2-amino-8-hydroxy-6-sulfonaphthalen-1-yl)diazenyl)biphenyl-4-yl)diazenyl)-5-hydroxy-3-((e)-(4-nitrophenyl)diazenyl)naphthalene-2,7-disulfonic acid	0.99029	0.554072	0.930647	1	0.994792	1	0.764058	1	1	0	0.7	0.799412	1	1	0.906783
4-amino-6-((4'-((2,4-diamino-3-methyl-6-sulfophenyl)diazenyl)biphenyl-4-yl)diazenyl)-5-hydroxy-3-((3-nitrophenyl)diazenyl)naphthalene-2,7-disulfonic acid	0.99029	0.554072	0.930647	1	0.994792	1	0.764058	1	1	0	0.7	0.799412	1	1	0.906783
4-amino-6-((4'-((7-amino-1-hydroxy-3-sulfonaphthalen-2-yl)diazenyl)biphenyl-4-yl)diazenyl)-5-hydroxy-3-((3-nitrophenyl)diazenyl)naphthalene-2,7-disulfonic acid	0.978517	0.796223	0.999996	1	0.981132	1	0.574235	0.999286	1	1	1	0.888148	1	1	0.955553
4-amino-n-(1-aza-tricyclo[3.3.1.1*3,7*]dec-4-yl)-5-chloro-2-methoxy-benzamide	0.008155	0.097849	0.000224	0	0	0	0.155097	0	0	0	0	0.003243	0	0	0.003874
4-amino-n-(1-benzylpiperidin-4-yl)-5-chloro-2-methoxybenzamide	0.997365	0.375522	0.998594	1	1	1	0.445619	0.999286	1	1	1	0.993723	1	1	0.996561
4-amino-n-(2,6-bis-methylamino-pyrimidin-4-yl)-benzenesulfonamide	1	0.958893	0.999899	1	0.999476	1	0.601778	0.999286	1	1	1	0.999033	1	1	0.999644
4-benzhydryloxymethyl-1-[3-(4-methoxy-phenyl)-propyl]-piperidine	0.01883	0.362702	0.000478	0	0.001865	0	0.666179	0	0	0	0	0.001018	0	0	0.006775
4-benzyl-2-ethyl-[1,2,4]thiadiazolidine-3,5-dione	0.99994	0.941236	0.997849	1	0.999476	1	0.55795	0.999286	1	1	1	0.999033	1	1	0.998941
4-benzyloxyaniline	0.927462	0.143859	0.999998	1	1	1	0.169548	0.999286	1	1	1	0.897851	1	1	0.941771
4-butylamino-1-ethyl-1h-pyrazolo[3,4-b]pyridine-5-carboxylic acid ethyl ester	0.903533	0.406634	0.860134	1	0.986601	1	0.040021	0.108108	0.002364	1	0.3	0.798642	1	1	0.854103
4-desmethylolanzapine	0.976243	0.983175	0.98366	1	1	1	0.645515	0.999286	1	1	1	0.899476	1	1	0.953126
4-dipentylcarbamoyl-4-[(quinoline-3-carbonyl)-amino]-butyric acid	1	0.999201	0.999894	1	0.988964	1	0.614658	0.999267	1	1	1	0.999511	1	1	0.999802
4-hydroxy reveromycin a	0.996913	0.978938	0.999999	1	0.968952	1	0.735013	1	1	1	1	0.996269	1	1	0.997727
4-hydroxy-3-methoxybenzaldehyde	0.026585	0.119083	6.1e-05	0	0.051587	0.013889	0.398191	0.020408	0.017143	0	0	0.006645	0.013889	0	0.011097
4-hydroxy-7-(3-(5-hydroxy-6-((2-methoxyphenyl)diazenyl)-7-sulfonaphthalen-2-yl)ureido)-3-((2-methyl-4-sulfophenyl)diazenyl)naphthalene-2-sulfonic acid	0.978517	0.796223	0.999996	1	0.981132	1	0.574235	0.999286	1	1	1	0.888148	1	1	0.955553
4-hydroxy-7-(3-(5-hydroxy-7-sulfo-6-((e)-(6-sulfonaphthalen-1-yl)diazenyl)naphthalen-2-yl)ureido)-3-((e)-m-tolyldiazenyl)naphthalene-2-sulfonic acid	0.99029	0.554072	0.930647	1	0.994792	1	0.764058	1	1	0	0.7	0.799412	1	1	0.906783
4-hydroxy-benzoic acid [1-(4-isopropyl-phenyl)-meth-(e)-ylidene]-hydrazide	0.851954	0.464023	0.160236	0	0.981132	1	0.470934	0.999286	1	1	1	0.281926	1	0	0.431372
4-hydroxytrimethoprim	5.3e-05	0	4.4e-05	0	0.104686	0	0	0	0	0	0	0.000312	0	0	0.000136
4-isopropyl-2-methoxy-6-({methyl-[2-(4-nitro-phenyl)-ethyl]-amino}-methyl)-phenol	0.846763	0.132045	0.999998	1	1	1	0.126674	0.999286	1	1	1	0.995928	1	1	0.947563
4-nitro-n-(2,2,2-trichloro-1-(4-chlorophenylthio)ethyl)benzamide	0.060052	0.953264	0.000236	0	0.00122	0	0.686962	0	0	0	0	0.001616	0	0	0.020635
4-phenyl-1-[(s)-2-(pyrrolidine-1-carbonyl)-pyrrolidin-1-yl]-butan-1-one	0.966956	0.077019	0.999998	1	1	1	0.070447	0.999286	1	1	1	0.996794	1	1	0.987916
4-phenylamino benzoic acid	0.905185	0.026104	0.997963	1	1	1	0.380321	0.999286	1	1	1	0.997541	1	1	0.966896
4-quinazolone	0.9986	0.464073	0.999997	1	1	1	0.443933	0.999286	1	1	1	0.995551	1	1	0.998049
4-tert-butyl-n-[6-(2-hydroxy-ethoxy)-5-(3-methoxy-phenoxy)-pyrimidin-4-yl]-benzenesulfonamide	1	0.949586	0.99989	1	0.999476	1	0.560892	0.999286	1	1	1	0.999033	1	1	0.999641
4,4'-((1h-imidazol-1-yl)methylene)dibenzonitrile	6.1e-05	0.895699	1e-06	0	0.002283	0	0.214624	0.001321	0	0	0	0.001005	0	0	0.000355
4,4'-((4-nitrophenyl)methylene)bis(n,n-dimethylaniline)	0.077993	0.955909	0.00011	0	0.00122	0	0.739602	0	0	0	0	0.001616	0	0	0.026573
4,4'-(3-sulfobiphenyl-4,4'-diyl)bis(diazene-2,1-diyl)bis(3-aminonaphthalene-2,7-disulfonic acid)	0.978517	0.796223	0.999996	1	0.981132	1	0.574235	0.999286	1	1	1	0.888148	1	1	0.955553
4,7-dimethyl-7h-4lamda-pyrido[2,3-c]carbazole	0.201789	0.100888	0.001143	0	0	0	0.135976	0	0	0	0	0.002044	0	0	0.068325
4'-(2-ethyl-5,7-dimethyl-imidazo[4,5-b]pyridin-3-ylmethyl)-biphenyl-2-sulfonic acid benzoylamide	1	0.999831	0.999965	1	0.987073	1	0.740262	0.998439	1	1	1	0.999475	1	1	0.999813
4'-[2-butyl-6-(3-isopropyl-3-methyl-ureido)-4-oxo-4h-quinazolin-3-ylmethyl]-biphenyl-2-sulfonic acid benzyloxycarbonylamide(l-162620)	1	0.999831	0.999965	1	0.987073	1	0.740262	0.998439	1	1	1	0.999475	1	1	0.999813
4'-[2-ethyl-6-(3-isopropyl-3-methyl-ureido)-4-oxo-4h-quinazolin-3-ylmethyl]-3'-fluoro-biphenyl-2-sulfonic acid cyclopropylethyloxycarbonylamide(l-163579)	1	0.999769	0.999963	1	0.984826	1	0.717874	0.998403	1	1	1	0.999438	1	1	0.9998
4'''-methylamentoflavone	0.032628	0.111294	6.4e-05	0	0.051587	0.013889	0.413347	0.020408	0.017143	0	0	0.004023	0.013889	0	0.012238
5-((4-azido-3-iodobenzamido)methyl)-n,n-dimethyl-1h-tetrazole-1-carboxamide	0.201789	0.100888	0.001143	0	0	0	0.135976	0	0	0	0	0.002044	0	0	0.068325
5-(1,4-diazepan-1-ylsulfonyl)isoquinoline	0.999976	0.99029	0.999981	1	0.999476	1	0.733645	0.999286	1	1	1	0.999033	1	1	0.999664
5-(2-(diethylamino)ethylamino)-10-methoxy-6h-imidazo[4,5,1-de]acridin-6-one	0.201789	0.100888	0.001143	0	0	0	0.135976	0	0	0	0	0.002044	0	0	0.068325
5-(2-(diethylamino)ethylamino)-6h-imidazo[4,5,1-de]acridin-6-one	0.201789	0.100888	0.001143	0	0	0	0.135976	0	0	0	0	0.002044	0	0	0.068325
5-(2-(diethylamino)ethylamino)-7-hydroxy-10-methoxy-6h-imidazo[4,5,1-de]acridin-6-one	0.201789	0.100888	0.001143	0	0	0	0.135976	0	0	0	0	0.002044	0	0	0.068325
5-(2-(diethylamino)ethylamino)-7-hydroxy-8,9-dimethoxy-6h-imidazo[4,5,1-de]acridin-6-one	0.201789	0.100888	0.001143	0	0	0	0.135976	0	0	0	0	0.002044	0	0	0.068325
5-(2-(diethylamino)ethylamino)-7,10-dimethoxy-6h-imidazo[4,5,1-de]acridin-6-one	0.201789	0.100888	0.001143	0	0	0	0.135976	0	0	0	0	0.002044	0	0	0.068325
5-(2-(diethylamino)ethylamino)-8-hydroxy-6h-imidazo[4,5,1-de]acridin-6-one	0.201789	0.100888	0.001143	0	0	0	0.135976	0	0	0	0	0.002044	0	0	0.068325
5-(2-(dimethylamino)ethylamino)-1-ethyl-6h-imidazo[4,5,1-de]acridin-6-one	0.201789	0.100888	0.001143	0	0	0	0.135976	0	0	0	0	0.002044	0	0	0.068325
5-(2-(dimethylamino)ethylamino)-1-methyl-6h-imidazo[4,5,1-de]acridin-6-one	0.201789	0.100888	0.001143	0	0	0	0.135976	0	0	0	0	0.002044	0	0	0.068325
5-(2-(dimethylamino)ethylamino)-2-methylbenzo[d]thiazole-4,7-dione	0.06832	0.287796	0.006282	0	0.000822	0	0.007932	0	0	0	0	0.000654	0	0	0.025085
5-(2-(dimethylamino)ethylamino)-6h-imidazo-[4,5,1-de]acridin-6-one	0.201789	0.100888	0.001143	0	0	0	0.135976	0	0	0	0	0.002044	0	0	0.068325
5-(2-(dimethylamino)ethylamino)-8-hydroxy-1-methyl-6h-imidazo[4,5,1-de]acridin-6-one	0.201789	0.100888	0.001143	0	0	0	0.135976	0	0	0	0	0.002044	0	0	0.068325
5-(2-(dimethylamino)ethylamino)-8-hydroxy-6h-imidazo[4,5,1-de]acridin-6-one	0.201789	0.100888	0.001143	0	0	0	0.135976	0	0	0	0	0.002044	0	0	0.068325
5-(2-carboxy-ethyl)-6-[6-(4-methoxy-phenyl)-hex-5-enyloxy]-9-oxo-9h-xanthene-2-carboxylic acid	1	0.999973	0.999521	1	0.90677	1	0.771498	1	1	1	1	0.999547	1	1	0.999689
5-(2-phenylh-pyrazolo[1,5-a]pyridin-3-yl)-1h-pyrazolo[3,4-c]pyridazin-3-amine	0.998835	0.911077	0.989567	1	0.999476	1	0.496495	0.999286	1	1	1	0.997337	1	1	0.995247
5-(3-aminophenyl)-n-(7-(hydroxyamino)-7-oxoheptyl)isoxazole-3-carboxamide	0.758852	0.138957	0.999998	0	1	1	0.179013	0.999286	1	1	1	0.895928	1	1	0.884926
5-(3,5-diethoxy-4-pyrrol-1-yl-benzyl)-pyrimidine-2,4-diamine	0.991799	1	1	1	0.972677	0.995074	0.194858	0.999284	0.995074	1	1	1	0.995074	1	0.997266
5-(4-amino-imidazo[4,5-c]pyridin-1-yl)-3-hydroxymethyl-cyclopent-3-ene-1,2-diol	0.967943	0.621399	0.999998	1	1	1	0.424891	0.999286	1	1	0.4	0.995027	1	1	0.987656
5-(4-chlorophenyl)-1-(4-methoxyphenyl)-3-(trifluoromethyl)-1h-pyrazole	0.012883	0.894923	0.009021	0	0.00122	0	0.49062	0	0	0	0	0.001633	0	0	0.007846
5-(4-chlorophenyl)-n-(3,5-dimethoxyphenyl)furan-2-carboxamide	0.796417	0.948597	0.117519	1	0.5	0	0.612407	0.999286	0	0	0.1	0.501996	0	0	0.471977
5-(4-chlorophenylamino)-2-methyl-9-nitro-5h-chromeno[4,3-b]pyridine-3-carbonitrile	6.1e-05	0.895699	1e-06	0	0.002283	0	0.214624	0.001321	0	0	0	0.001005	0	0	0.000355
5-(4-fluoro-phenyl)-1-(4-methanesulfonyl-phenyl)-3-trifluoromethyl-1h-pyrazole	0.11457	0.999804	0.000434	0	0.033704	0	0.79768	0	0	0	0	0.00356	0	0	0.039521
5-(4-methanesulfonyl-phenyl)-6-phenyl-imidazo[2,1-b]thiazole	0.11457	0.999804	0.000434	0	0.033704	0	0.79768	0	0	0	0	0.00356	0	0	0.039521
5-(4-trifluoromethyl-benzyloxy)-quinazoline-2,4-diamine	0.991799	1	1	1	0.972677	0.995074	0.194858	0.999284	0.995074	1	1	1	0.995074	1	0.997266
5-(4'-((2,4-diamino-5-((4-sulfophenyl)diazenyl)phenyl)diazenyl)biphenyl-4-yl)diazenyl)-2-hydroxybenzoic acid	0.077993	0.955909	0.00011	0	0.00122	0	0.739602	0	0	0	0	0.001616	0	0	0.026573
5-(4'-((3,5-dibutyl-1h-1,2,4-triazol-1-yl)methyl)biphenyl-2-yl)-1h-tetrazole	1	0.999831	0.999965	1	0.987073	1	0.740262	0.998439	1	1	1	0.999475	1	1	0.999813
5-(5-CHLORO-2,4-DIHYDROXYPHENYL)-N-ETHYL-4-(4-METHOXYPHENYL)-1H-PYRAZOLE-3-CARBOXAMIDE	0.993337	0.091628	0.999989	1	1	1	0.121278	0.999286	1	1	1	0.996794	1	1	0.996707
5-(5-CHLORO-2,4-DIHYDROXYPHENYL)-N-ETHYL-4-(4-METHOXYPHENYL)ISOXAZOLE-3-CARBOXAMIDE	0.993337	0.091628	0.999989	1	1	1	0.121278	0.999286	1	1	1	0.996794	1	1	0.996707
5-(5-nitrothiazol-2-ylthio)-n-((tetrahydrofuran-2-yl)methyl)-1,3,4-thiadiazol-2-amine	0.997907	0.907471	0.975761	1	0.999476	1	0.493257	0.999286	1	1	1	0.878685	1	1	0.950784
5-(5-nitrothiazol-2-ylthio)-n-propyl-1,3,4-thiadiazol-2-amine	0.997907	0.907471	0.975761	1	0.999476	1	0.493257	0.999286	1	1	1	0.878685	1	1	0.950784
5-(6-aminopurin-9-yl)-4-fluoro-3-hydroxymethylcyclopent-3-ene-1,2-diol	0.967943	0.621399	0.999998	1	1	1	0.424891	0.999286	1	1	0.4	0.995027	1	1	0.987656
5-(6-ethyl-thieno[2,3-d]pyrimidin-4-ylsulfanyl)-[1,3,4]thiadiazol-2-ylamine	0.995577	0.948105	0.924801	1	0.999476	1	0.587291	0.999286	1	1	1	0.999033	1	1	0.973137
5-(7-(methylsulfonyl)-2-morpholino-6,7-dihydro-5h-pyrrolo[2,3-d]pyrimidin-4-yl)pyrimidin-2-amine	0.887405	0.415082	0.999956	1	1	1	0.42163	0.999286	1	1	0.7	0.882056	1	1	0.923139
5-(quinoxalin-6-ylmethylene)thiazolidine-2,4-dione	0.097303	0.108079	6e-05	0	0.051587	0.013889	0.152085	0.020408	0.017143	0	0	0.006801	0.013889	0	0.034721
5-[1-(3,4-Dimethoxy-Benzoyl)-1,2,3,4-Tetrahydro-Quinolin-6-Yl]-6-Methyl-3,6-Dihydro-[1,3,4]Thiadiazin-2-One	0.906068	0.227646	0.998356	1	1	1	0.364027	0.999286	1	1	1	0.996452	1	1	0.966959
5-[4-(2-amino-ethylamino)-3-nitro-phenyl]-6-ethyl-pyrimidine-2,4-diamine	0.0003	0.840435	0	0	0.003363	0.002132	0.197301	0.004392	0.002132	0	0	0.003543	0.002132	0	0.001281
5-{[2-(3,4-dimethoxy-phenyl)-ethyl]-methyl-amino}-2-isopropyl-2-(3,4,5-trimethoxy-phenyl)-pentanenitrile	0.987588	0.984249	0.999999	1	0.746603	1	0.904555	0.998594	1	1	1	0.999902	1	1	0.99583
5-{2-[3-benzyl-4-(4-methyl-piperazine-1-carbonyl)-2-oxo-piperazin-1-yl]-hexanoylamino}-6-cyclohexyl-4-hydroxy-2-isopropyl-hexanoic acid propylamide(pepstatin(a-70450))	0.921542	0.030615	0.997929	1	1	1	0.356023	0.999286	1	1	1	0.997541	1	1	0.972337
5-allyl-10-methoxy-2,2,4-trimethyl-2,5-dihydro-1h-6-oxa-1-aza-chrysene	0.908125	0.980089	0.08318	0	0.997159	1	0.542917	1	1	1	0.6	0.099274	1	0	0.363526
5-amino-1-(2,6-dichloro-4-trifluoromethyl-phenyl)-4-trifluoromethanesulfinyl-1h-pyrazole-3-carbonitrile	0.002151	0.072106	0.000123	0	0.028009	0.003663	0.124385	0.001479	0	0	0	0.001862	0.003663	0	0.001379
5-amino-2-((4'-((6-amino-3-hydroxy-1-sulfonaphthalen-2-yl)diazenyl)biphenyl-4-yl)diazenyl)-3-hydroxynaphthalene-1,7-disulfonic acid	0.978517	0.796223	0.999996	1	0.981132	1	0.574235	0.999286	1	1	1	0.888148	1	1	0.955553
5-benzamido-4-hydroxy-3-((4-(6-sulfonaphthalen-2-ylcarbamoyl)phenyl)diazenyl)naphthalene-2,7-disulfonic acid	0.99029	0.554072	0.930647	1	0.994792	1	0.764058	1	1	0	0.7	0.799412	1	1	0.906783
5-benzyloxytryptamine	0.011839	0.688752	0.006509	0	0.00122	0	0.4497	0	0	0	0	0.0021	0	0	0.006816
5-chloro-(7r)-spiro[1a,2,7,7a-tetrahydronaphtho[2,3-b]oxirene-2,2'-naphtho[1,8-de][1,3]dioxine]-6,7-diol	0.667519	0.522273	0.99999	0	0.981132	1	0.397449	0	1	0	0	0.39026	1	1	0.685923
5-chloro-1h-indole-2-carboxylic acid [(s)-1-(4-fluoro-benzyl)-2-(4-hydroxy-piperidin-1-yl)-2-oxo-ethyl]-amide	0.215036	0	1e-05	0	0.296685	1	0	0	0	1	0.5	0.400335	1	0	0.205127
5-chloro-3-(1-{3-[5-methanesulfonyl-3-(4-trifluoromethyl-phenyl)-4,5,6,7-tetrahydro-pyrazolo[4,3-c]pyridin-1-yl]-propyl}-piperidin-4-yl)-1-methyl-1,3-dihydro-benzoimidazol-2-one	0.999933	0.986804	0.999663	1	0.987796	1	0.615775	0.999274	1	1	1	0.998567	1	1	0.999388
5-chloro-thiophene-2-carboxylic acid {(r)-2-methoxy-1-[3-methyl-4-(3-oxo-morpholin-4-yl)-phenylcarbamoyl]-ethyl}-amide	0.249213	0.999923	0.857302	0	0	0	0.836645	0	0	0	0	0.10441	0	1	0.403642
5-chlorosalicylic acid	0.986043	0.152933	0.978015	1	0.97957	1	0.10649	0.999287	1	1	1	1	1	1	0.988019
5-dimethylamino-naphthalene-1-sulfonic acid (3,4-dimethyl-isoxazol-5-yl)-amide	1	0.992668	0.998169	1	0.982235	1	0.54988	1	1	1	1	1	1	1	0.99939
5-dipentylcarbamoyl-5-[((r)-naphthalene-2-carbonyl)-amino]-pentanoic acid	1	0.951085	0.999844	1	0.999476	1	0.564821	0.999286	1	1	1	0.999033	1	1	0.999626
5-epireveromycin a	0.996913	0.978938	0.999999	1	0.968952	1	0.735013	1	1	1	1	0.996269	1	1	0.997727
5-ethyl-2-propyl-3-(2'-tetrazol-1-yl-biphenyl-4-ylmethyl)-3h-imidazole-4-carbaldehyde	1	0.999831	0.999965	1	0.987073	1	0.740262	0.998439	1	1	1	0.999475	1	1	0.999813
5-guanidino-2-(mercaptomethyl)pentanoic acid	0.999825	0.742071	0.999889	1	0.939789	1	0.623926	1	1	1	1	0.997794	1	1	0.999169
5-hydroxy-2-(3-hydroxy-4-methoxyphenyl)-3,7-dimethoxy-4h-chromen-4-one	0.825596	0.234041	0.005974	1	0.03229	0	0.606426	0	0	0	0	0.299646	0	0	0.377072
5-Hydroxy-2-(Hydroxymethyl)-4h-Pyran-4-One	0.982254	0.209752	0.999998	1	1	1	0.062795	0.999286	1	1	0.8	0.995176	1	1	0.992476
5-hydroxy-4-(4-methanesulfonyl-phenyl)-3-phenyl-5h-furan-2-one	0.01883	0.843215	0.001955	0	0.075787	0	0.733055	0	0	0	0	0.001399	0	0	0.007395
5-hydroxy-4-{(r)-6-hydroxy-5-[(e)-4-methyl-6-(2,6,6-trimethyl-cyclohex-1-enyl)-hex-3-enyl]-3,6-dihydro-2h-pyran-2-yl}-5h-furan-2-one	0.896026	0.03229	0.997908	1	1	1	0.35027	0.999286	1	1	1	0.997541	1	1	0.963825
5-hydroxyflavone	0.999994	0.999995	1	1	0.893863	1	0.999382	0.998342	1	1	1	0.998348	1	1	0.999447
5-hydroxytryptamine	1	0.957214	0.999882	1	0.999476	1	0.593953	0.999286	1	1	1	0.999033	1	1	0.999638
5-methyl-2-[2-(naphthalen-2-yloxy)-ethyl]-2,4-dihydro-pyrazol-3-one	0.816674	0.370359	0.099328	1	0.763221	1	0.037649	0.999244	1	0	0.1	1	1	0	0.638667
5-methyl-3,5-dihydro-2h-pyrrolo[2,3-f]indole-1-carboxylic acid pyridin-3-ylamide	0.000258	0.126312	0.00011	0	0.002994	0	0.203996	0	0	0	0	0.003654	0	0	0.001341
5-n-butyl-4-[[2'-[n-(tert-butoxycarbonyl)sulfamoyl]biphenyl-4yl]methyl]-2-[2-trifluoromethyl-phenyl]-2,4-dihydro-3h-1,2,4-triazol-3-one	1	0.999831	0.999965	1	0.987073	1	0.740262	0.998439	1	1	1	0.999475	1	1	0.999813
5-nitro-2-(pyridin-2-yl)-1-(2-(pyridin-4-yl)ethyl)-1h-benzo[d]imidazole	6.1e-05	0.895699	1e-06	0	0.002283	0	0.214624	0.001321	0	0	0	0.001005	0	0	0.000355
5-nitroisatin	0.986005	0.082411	0.999984	1	1	1	0.116636	0.999286	1	1	1	0.996794	1	1	0.994261
5,11-dimethyl-6h-pyrido[4,3-b]carbazole	1	0.987131	0.999912	1	0.999476	1	0.673364	0.999286	1	1	1	0.999033	1	1	0.999648
5,5'-(3-(pyridin-2-yl)-1,2,4-triazine-5,6-diyl)difuran-2-sulfonic acid	0.077993	0.955909	0.00011	0	0.00122	0	0.739602	0	0	0	0	0.001616	0	0	0.026573
5,5'-methylenebis(2-hydroxybenzoic acid)	0.146558	0.970806	0.003012	1	0.236095	0	0.707594	0	0	0	0	0.302941	0	0	0.150837
5,6,7-trihydroxyflavone	0.094967	0.079565	0.000559	0	0.506944	0.013889	0.143673	0.020408	0.017143	0	0	0.003187	0.013889	0	0.032905
5,7-dihydroxy-2-(4-hydroxyphenyl)-4H-chromen-4-one	0.142052	0.17112	0.000207	0	0.409899	0	0.490952	0.001529	0	0	0	0.004386	0	0	0.048882
5,7-dihydroxy-3-(4-methoxy-phenyl)-chromen-4-one	0.482655	0.362298	0.126569	0	0	0	0.434373	0	0.017143	0	0	0.005344	0	0	0.204856
5,7-diphenyl-7h-pyrrolo[2,3-d]pyrimidin-4-ylamine	0.999975	0.992776	0.999982	1	0.999476	1	0.748067	0.999286	1	1	1	0.999033	1	1	0.999663
5,8-dihydroxy-10-methoxy-2-propyl-4h-benzo[h]chromen-4-one	0.397152	0.385991	0.00207	0	0	0	0.457823	0	0	0	0.2	0.105344	0	0	0.168189
5,8-dihydroxy-2-(1-hydroxy-4-methyl-pent-3-enyl)-[1,4]naphthoquinone	0.345266	0.500198	0.001558	0	0.00122	0	0.419822	0	0	0	0	0.0021	0	0	0.116308
6-((4-(2-(4-tert-butylphenyl)-1h-benzo[d]imidazol-4-yl)piperazin-1-yl)methyl)quinoxaline	1	0.997313	0.999895	1	0.967465	1	0.620228	0.99847	1	1	1	1	1	1	0.999965
6-(2-(2-(5-cyano-4,5-dihydro-1h-pyrazol-1-yl)-2-oxoethylamino)ethylamino)nicotinonitrile	0.997123	0.813994	0.999671	1	0.930433	1	0.668199	0.999292	1	1	1	0.681909	1	1	0.892901
6-(2-(4-(2,4-dichlorophenyl)-5-(4-methyl-1h-imidazol-2-yl)pyrimidin-2-ylamino)ethylamino)nicotinonitrile	0.042598	0.793107	8.5e-05	0	0.00122	0	0.493474	0	0	0	0	0.003654	0	0	0.015446
6-(2-{(2-hydroxy-ethyl)-[3-(4-nitro-phenyl)-propyl]-amino}-ethylamino)-1,3-dimethyl-1h-pyrimidine-2,4-dione	0.976243	0.983175	0.98366	1	1	1	0.645515	0.999286	1	1	1	0.899476	1	1	0.953126
6-(2-chlorophenyl)-1-methyl-8,9-dihydro-4h,7h-cyclopenta[4,5]thieno[3,2-f][1,2,4]triazolo[4,3-a][1,4]diazepin-8-yl-1,4-oxazinan-4-ylmethanone	1	0.999991	0.998177	1	0.996214	1	0.991901	1	1	1	1	0.999498	1	1	0.999225
6-(2-tert-butyl-5-(6-methylpyridin-2-yl)-1h-imidazol-4-yl)quinoxaline	0.95321	0.850755	0.494224	1	0.5	0	0.415903	0	0	0	0.1	0.200711	0	1	0.549381
6-(2,5-Dimethoxy-Benzyl)-5-Methyl-Pyrido[2,3-D]Pyrimidine-2,4-Diamine	0.991799	1	1	1	0.972677	0.995074	0.194858	0.999284	0.995074	1	1	1	0.995074	1	0.997266
6-(2,6-dichlorophenyl)-2-((4-fluoro-3-methylphenyl)amino)-8-methylpyrido[2,3-d]pyrimidin-7(8h)-one	0.999948	0.995587	0.999992	1	0.966712	1	0.710478	1	1	1	1	0.998577	1	1	0.999506
6-(3-cyclobutyl-2,3,4,5-tetrahydro-1h-benzo[d]azepin-7-yloxy)-n-methylnicotinamide	1	0.999931	0.999322	1	0.974639	1	0.676755	0.998288	1	1	1	0.999044	1	1	0.999455
6-(4-((3-(2,6-dichlorophenyl)-5-isopropylisoxazol-4-yl)methoxy)phenyl)-1-naphthoic acid	0.000258	0.126312	0.00011	0	0.002994	0	0.203996	0	0	0	0	0.003654	0	0	0.001341
6-(4-chloro-phenyl)-7-[1-pyridin-4-yl-meth-(z)-ylidene]-6,7-dihydro-5h-indolizin-8-one	0.001581	0.070609	2e-05	0	0.001255	0	0.157527	0.001825	0.001745	0	0	0.006843	0	0	0.002814
6-(4-chlorophenyl)-7-(pyridin-3-ylmethylene)-6,7-dihydroindolizin-8(5h)-one	6.1e-05	0.895699	1e-06	0	0.002283	0	0.214624	0.001321	0	0	0	0.001005	0	0	0.000355
6-(4-fluoro-phenyl)-5-pyridin-4-yl-2,3-dihydro-imidazo[2,1-b]thiazole	0.88259	0.908781	0.059701	0	0.00122	0	0.502515	0.999286	0	0	0	0.003243	0	1	0.315178
6-[(4-cyano-3-naphthalen-1-yl-phenyl)-(3-methyl-3h-imidazol-4-yl)-methoxymethyl]-nicotinonitrile	0.958387	1	0.999999	1	1	1	0.710103	1	1	1	1	1	1	1	0.986129
6-[3-(4-acetyl-2-ethyl-5-hydroxy-phenoxy)-propoxy]-5-(2-carboxy-ethyl)-9-oxo-9h-xanthene-2-carboxylic acid	1	0.999624	0.998109	1	1	1	0.561582	0.999243	1	1	1	0.999448	1	1	0.999186
6-[3-(4-ethoxy-tetrahydro-pyran-4-yl)-5-fluoro-phenoxymethyl]-1h-quinolin-2-one	0.816674	0.370359	0.099328	1	0.763221	1	0.037649	0.999244	1	0	0.1	1	1	0	0.638667
6-{[(1r,3s,4s)-3-(6-amino-9h-purin-9-yl)-4-hydroxycyclopentyl]formamido}-n-[(1s)-4-carbamimidamido-1-{[(1s)-4-carbamimidamido-1-{[(1s)-4-carbamimidamido-1-{[(1s)-4-carbamimidamido-1-{[(1s)-4-carbamimidamido-1-{[(1s)-4-carbamimidamido-1-carbamoylbutyl]carbamoyl}butyl]carbamoyl}butyl]carbamoyl}butyl]carbamoyl}butyl]carbamoyl}butyl]hexanamide	0.999815	0.910666	0.996667	1	0.965287	1	0.58639	1	1	1	1	0.999088	1	1	0.998523
6-{[(1s,3r,4r)-3-(6-amino-9h-purin-9-yl)-4-hydroxycyclopentyl]formamido}-n-[(1s)-4-carbamimidamido-1-{[(1s)-4-carbamimidamido-1-{[(1s)-4-carbamimidamido-1-{[(1s)-4-carbamimidamido-1-{[(1s)-4-carbamimidamido-1-{[(1s)-4-carbamimidamido-1-carbamoylbutyl]carbamoyl}butyl]carbamoyl}butyl]carbamoyl}butyl]carbamoyl}butyl]carbamoyl}butyl]hexanamide	0.999815	0.910666	0.996667	1	0.965287	1	0.58639	1	1	1	1	0.999088	1	1	0.998523
6-amino-2-[2-((r)-2-{2-[2-[2-amino-3-(3h-imidazol-4-yl)-propionylamino]-3-((r)-2-methyl-1h-indol-3-yl)-propionylamino]-propionylamino}-3-1h-indol-3-yl-propionylamino)-3-phenyl-propionylamino]-hexanoic acid amide	1	0.979665	0.999998	1	0.977774	1	0.586316	0.998561	1	1	1	0.998891	1	1	0.99963
6-amino-5-[(e)-2-(4-{[4-({4-[(e)-2-(2-amino-8-hydroxy-6-sulfonaphthalen-1-yl)diazen-1-yl]-3-sulfophenyl}carbamoyl)benzene]amido}-2-sulfophenyl)diazen-1-yl]-4-hydroxynaphthalene-2-sulfonic acid	0.99029	0.554072	0.930647	1	0.994792	1	0.764058	1	1	0	0.7	0.799412	1	1	0.906783
6-azepan-1-ylmethyl-2-(4,4-diphenyl-butyl)-1,2,3,4-tetrahydro-isoquinolin-5-ol	0.999847	0.999992	0.999739	1	0.891956	1	0.834244	0.99786	1	1	1	0.999689	1	1	0.999758
6-butyl-4,10-dioxo-1,4,7,10-tetrahydro-[1,7]phenanthroline-2,8-dicarboxylic acid	0.747558	0.139078	0.990622	0	1	1	0.260701	0.999286	1	1	0.9	0.20983	1	1	0.649337
6-chloro-2-methoxy-n-(pyridin-3-yl)acridin-9-amine	6.1e-05	0.895699	1e-06	0	0.002283	0	0.214624	0.001321	0	0	0	0.001005	0	0	0.000355
6-chloro-7-(2-morpholinoethylamino)quinoline-5,8-dione	0.673674	0.175278	0.999998	0	1	1	0.213251	0.999286	1	1	0.9	0.796858	1	1	0.82351
6-cyclohexylmethoxy-9h-purine(nu2017)	0.999975	0.934822	0.998402	1	0.999476	1	0.566485	0.999286	1	1	1	0.999033	1	1	0.999137
6-ethyl-1-(1-hydroxy-cyclopropylmethyl)-11,11-dimethyl-1,2,3,4,5,6-hexahydro-2,6-methano-benzo[d]azocin-8-ol	1	0.983954	0.999984	1	0.954298	1	0.673481	0.999263	1	1	1	0.999275	1	1	0.999753
6-ethyl-4-trifluoromethyl-6,7,8,9-tetrahydro-1h-pyrido[3,2-g]quinolin-2-one	0.799438	0.999876	0.478896	0	0.757728	1	0.903423	0	1	1	0.6	0.799179	1	1	0.692504
6-hydroxybenzo[d][1,3]oxathiol-2-one	0.97162	0.080163	0.999639	1	1	1	0.124021	0.999286	1	1	1	0.996794	1	1	0.989351
6-hydroxydopamine	0.996338	1	0.999484	1	0.989434	1	0.379816	1	1	1	1	1	1	1	0.998607
6-hydroxyflavone	0.035797	0.865689	6.7e-05	0	0.00122	0	0.639694	0	0	0	0	0.0021	0	0	0.012655
6-imidazo[1,5-a]pyridin-5-yl-hexanoic acid	0.002367	0.612152	0.000376	0	0.00122	0	0.405566	0	0	0	0	0.003654	0	0	0.002132
6-methoxy-2-naphthylacetic acid	0.012883	0.894923	0.009021	0	0.00122	0	0.49062	0	0	0	0	0.001633	0	0	0.007846
6-methoxy-n-(2-(piperidin-2-yl)ethyl)quinolin-8-amine	0.077993	0.955909	0.00011	0	0.00122	0	0.739602	0	0	0	0	0.001616	0	0	0.026573
6-methoxyflavanon	0.503024	0.227236	0.007898	0	0.197354	0	0.577951	0	0	0	0	0.099646	0	0	0.203523
6-methoxyflavone	0.825596	0.234041	0.005974	1	0.03229	0	0.606426	0	0	0	0	0.299646	0	0	0.377072
6-methyl-2-phenylazo-pyridin-3-ol	0.215302	0.986729	0.357384	0	0.442937	0	0.703201	0.999277	0.001522	0	0.1	0.5	0	0	0.357562
6-o-benzoyl polygolitosyl-(2->1)-alpha-galactose	0.904327	0.337247	0.924969	1	0.986196	1	0.130277	1	1	1	1	0.999123	1	1	0.942806
6-Oxo-8,9,10,11-Tetrahydro-7h-Cyclohepta[C][1]Benzopyran-3-O-Sulfamate	0.094391	0.142621	0.49883	0	0.5	0	0.26273	0.999286	0.017143	0	0.4	0.209241	0	0	0.267487
6,11-diethyl-3-furan-3-ylmethyl-1,2,3,4,5,6-hexahydro-2,6-methano-benzo[d]azocin-8-ol	1	0.971166	0.999867	1	0.999476	1	0.669182	0.999286	1	1	1	0.999033	1	1	0.999633
6,11-dimethyl-3-(tetrahydro-furan-2-ylmethyl)-1,2,3,4,5,6-hexahydro-2,6-methano-benzo[d]azocin-8-ol	1	0.983954	0.999984	1	0.954298	1	0.673481	0.999263	1	1	1	0.999275	1	1	0.999753
6,7-dimethyl-2-phenyl-quinoxaline (ag-1295 )	0.999994	0.990737	0.999961	1	0.999476	1	0.715924	0.999286	1	1	1	0.999033	1	1	0.999663
6,7,12,13-tetrahydro-5H-indolo[2,3-a]pyrrolo[3,4-c]carbazol-5-one	0.999919	0.962579	0.987332	1	0.999476	1	0.634269	0.999286	1	1	1	0.999033	1	1	0.995428
7-((3r,4r)-4-{4-[3-(2-methoxy-benzyloxy)-propoxy]-phenyl}-piperidin-3-yloxymethyl)-1,2,3,4-tetrahydro-quinoline	0.003594	0	0	0	0.068204	0	0	0	0	0	0	0.000672	0	0	0.001422
7-((4-((4-(4-benzamidobenzamido)-2-methylphenyl)diazenyl)-3-methoxyphenyl)diazenyl)naphthalene-1,3-disulfonic acid	0.978517	0.796223	0.999996	1	0.981132	1	0.574235	0.999286	1	1	1	0.888148	1	1	0.955553
7-(2-hydroxy-3-(4-methoxyphenoxy)propyl)-8-(2-(2-hydroxybenzylidene)hydrazinyl)-3-methyl-1h-purine-2,6(3h,7h)-dione	1	0.999961	0.999156	1	0.982856	1	0.584027	0.999287	1	1	1	1	1	1	0.999719
7-(2,6-dichlorophenyl)-5-methyl-n-[4-(2-pyrrolidin-1-ylethoxy)-phenyl]-1,2,4-benzotriazin-3-amine	0.224824	0.913071	0.138186	0	0.5	1	0.570286	0	1	1	0.6	0.301996	1	0	0.221668
7-(3-(dimethylamino)propoxy)-6-methoxy-2-(4-methyl-1,4-diazepan-1-yl)-n-(1-methylpiperidin-4-yl)quinazolin-4-amine	0.072469	0.937549	0.000132	0	0.00122	0	0.646273	0	0	0	0	0.102759	0	0	0.058453
7-(4-fluorophenylamino)-1-((1s,3r)-3-hydroxycyclopentyl)-3-(4-methoxyphenyl)-3,4-dihydropyrimido[4,5-d]pyrimidin-2(1h)-one	0.999984	0.993861	0.999991	1	0.966712	1	0.689241	1	1	1	1	0.998577	1	1	0.999517
7-(4-methyl-6-oxo-1,4,5,6-tetrahydro-pyridazin-3-yl)-4h-benzo[1,4]oxazin-3-one (bemoradan)	0.906068	0.227646	0.998356	1	1	1	0.364027	0.999286	1	1	1	0.996452	1	1	0.966959
7-(dipropylamino)-5,6,7,8-tetrahydronaphthalen-1-ol	1	0.961244	0.999893	1	0.999476	1	0.612522	0.999286	1	1	1	0.999033	1	1	0.999642
7-[(4-{[4-({4-[(6,8-disulfonaphthalen-2-yl)carbamoyl]phenyl}amino)-2,5-dihydroxy-3,6-dioxocyclohexa-1,4-dien-1-yl]amino}benzene)amido]naphthalene-1,3-disulfonic acid	0.978517	0.796223	0.999996	1	0.981132	1	0.574235	0.999286	1	1	1	0.888148	1	1	0.955553
7-[3-(2-cyclopropylmethyl-3-methoxy-4-methylcarbamoyl-phenoxy)-propoxy]-8-propyl-chroman-2-carboxylic acid	1	0.999973	0.999521	1	0.90677	1	0.771498	1	1	1	1	0.999547	1	1	0.999689
7-[3-(2-cyclopropylmethyl-3-methoxy-4-thiazol-4-yl-phenoxy)-propoxy]-8-propyl-chroman-2-carboxylic acid	1	0.999624	0.998109	1	1	1	0.561582	0.999243	1	1	1	0.999448	1	1	0.999186
7-[3-(3-methoxy-4-methylcarbamoyl-2-propyl-phenoxy)-propoxy]-8-propyl-chroman-2-carboxylic acid	1	0.999973	0.999521	1	0.90677	1	0.771498	1	1	1	1	0.999547	1	1	0.999689
7-[3-(4-acetyl-2-ethyl-5-hydroxy-phenoxy)-propoxy]-8-propyl-chroman-2-carboxylic acid	1	0.999973	0.999521	1	0.90677	1	0.771498	1	1	1	1	0.999547	1	1	0.999689
7-[3-(4-carbamoyl-3-methoxy-2-propyl-phenoxy)-propoxy]-8-propyl-chroman-2-carboxylic acid	1	0.999624	0.998109	1	1	1	0.561582	0.999243	1	1	1	0.999448	1	1	0.999186
7-[3-(4-hydroxy-tetrahydro-pyran-4-yl)-benzyloxy]-4-phenyl-3h-naphtho[2,3-c]furan-1-one	0.816674	0.370359	0.099328	1	0.763221	1	0.037649	0.999244	1	0	0.1	1	1	0	0.638667
7-[6-(3-hydroxy-oct-1-enyl)-2-oxa-bicyclo[2.2.1]hept-5-yl]-hept-5-enoic acid	1	0.967418	0.998255	1	0.855601	1	0.467749	1	1	1	1	0.995547	1	1	0.997934
7-chloro-5-(2,6-dichloro-phenyl)-1-methyl-1,3-dihydro-benzo[e][1,4]diazepin-2-one	0.002151	0.072106	0.000123	0	0.028009	0.003663	0.124385	0.001479	0	0	0	0.001862	0.003663	0	0.001379
7-fluoro-2-phenyl-4h-chromen-4-one	0.927462	0.143859	0.999998	1	1	1	0.169548	0.999286	1	1	1	0.897851	1	1	0.941771
7-hydroxy aristolochic a	0.999419	0.915219	0.996361	1	0.966712	1	0.548806	1	1	1	1	0.999213	1	1	0.998331
7-hydroxy-2-(4-hydroxyphenyl)-4h-chromen-4-one	0.198658	0.573069	0.613559	0	0.481132	0	0.477539	0	1	0	0	0.029545	0	0	0.280587
7-hydroxy-4-methyl-2H-chromen-2-one	0.035951	0.954687	0.000265	0	0.254193	0.018868	0.670418	0	0	0	0.1	0.104516	0.018868	0	0.04691
7-Hydroxystaurosporine	1	0.97675	0.999853	1	0.999476	1	0.68271	0.999286	1	1	1	0.999033	1	1	0.999629
7-METHOXY-1-METHYL-9H-BETA-CARBOLINE	0.113146	0.813898	7.9e-05	0	0.00122	0	0.475596	0	0	0	0	0.003654	0	0	0.03896
7-methoxy-4-(3-nitrobenzyl)isoquinolin-8-ol	6.1e-05	0.895699	1e-06	0	0.002283	0	0.214624	0.001321	0	0	0	0.001005	0	0	0.000355
7-methyl-8-oxo-5-p-tolyl-7,8-dihydro-[1,7]naphthyridine-6-carboxylic acid (3,5-bis-trifluoromethyl-benzyl)-methyl-amide (structural mix)	1	0.973263	0.999959	1	0.969122	1	0.597503	0.999253	1	1	1	0.999775	1	1	0.999911
7-phenyl-1-(5-(pyridin-2-yl)oxazol-2-yl)heptan-1-one	0.086323	0.085755	6.1e-05	0	0.051587	0.013889	0.291331	0.020408	0.017143	0	0	0.004023	0.013889	0	0.030136
7,8-DICHLORO-1,2,3,4-TETRAHYDROISOQUINOLINE	0.970313	0.202819	0.999998	1	1	1	0.060218	0.999286	1	1	1	0.995176	1	1	0.988496
7,8-dimethoxy-4-(3,4,5-trimethoxyphenyl)-1,2-dihydro-3h-benzo[e]isoindol-3-one	0.201789	0.100888	0.001143	0	0	0	0.135976	0	0	0	0	0.002044	0	0	0.068325
7,8-dimethoxy-4-(3,4,5-trimethoxyphenyl)-2,3-dihydro-1h-benzo[e]isoindole	0.201789	0.100888	0.001143	0	0	0	0.135976	0	0	0	0	0.002044	0	0	0.068325
7,8-dimethyl-1,3-dihydro-imidazo[4,5-b]quinolin-2-one	0.803428	0.634508	0.999452	1	0.898042	1	0.366726	1	0	1	0.8	0.492817	1	1	0.765232
8-({5-chloro-2-[4-(2-methoxyethyl)piperazin-1-yl]isonicotinoyl}amino)-1-(4-fluoro-phenyl)-4,5-dihydro-1h-benzo[g]-indazole-3-carboxamide	0.982716	0.967977	0.757342	1	0.999476	1	0.696214	0.999286	1	1	1	0.899687	1	0	0.879915
8-(2,6-dimethylbenzylamino)-n-(2-hydroxyethyl)-2,3-dimethylimidazo[1,2-a]pyridine-6-carboxamide	0.000202	0.737783	2.4e-05	0	0.002155	0	0.127102	0	0	0	0	0.002265	0	0	0.00083
8-(3-chloro-phenyl)-6-pyridin-4-ylmethyl-6h-pyrido[2,3-d]pyridazin-5-one	0.882959	0.204802	0.997649	1	1	1	0.342552	0.999286	1	1	1	0.608268	1	1	0.829625
8-(3-methoxyphenyl)-6-(pyridin-4-ylmethyl)quinoline	0.209914	0.166778	0.750171	0	1	1	0.304471	0.999286	1	1	0.9	0.10983	1	0	0.356638
8-(4-(4-(4-chlorobenzyl)piperazin-1-ylsulfonyl)phenyl)-1-propyl-1h-purine-2,6(3h,7h)-dione	1	0.975659	0.999957	1	0.993885	1	0.625314	1	1	1	1	0.999134	1	1	0.999697
8-(4-chloro-benzenesulfonylamino)-4-(3-pyridin-3-yl-propyl)-octanoic acid	0.000169	0.16165	0.000171	0	0.145202	0	0.28204	0.004471	0	0	0	0.002537	0	0	0.000959
8-[(1s,3as)-2,3,3a,4,5,6-hexahydro-1h-phenalen-1-yl]-1-phenyl-1,3,8-triazaspiro[4.5]decan-4-one	1	0.967197	0.999879	1	0.999476	1	0.646036	0.999286	1	1	1	0.999033	1	1	0.999637
8-[2-(3,4-dimethoxy-phenyl)-vinyl]-7-methyl-1,3-dipropyl-3,7-dihydro-purine-2,6-dione	1	0.982285	0.999981	1	0.966712	1	0.66753	1	1	1	1	0.998425	1	1	0.999469
8-{[5-chloro-2-(4-methylpiperazin-1-yl)isonicotinoyl]-amino}-1-(4-fluorophenyl)-4,5-dihydro-1h-benzo[g]indazole-3-carboxamide	0.996584	0.942378	0.942501	1	0.999476	1	0.588794	0.999286	1	1	1	0.999033	1	1	0.979373
8-acetylamino-22-(4-aminomethyl-benzyl)-5-carbamoylmethyl-16-carboxymethyl-1,1-dimethyl-4,7,15,18,21,24-hexaoxo-icosahydro-2,10,11-trithia-3a,6,14,17,20,23-hexaaza-cyclopentacyclotricosene-13-carboxylic acid (mk-0852)	0.00059	0.152782	3e-05	0	0.027366	0.002548	0.366808	0	0	0	0	0.001254	0.002548	0	0.000625
8-amino-1,3-bis-cyclopropylmethyl-3,7-dihydro-purine-2,6-dione	0.145502	0.075649	0.017503	0	0.017182	0	0.013901	0	0	0	0.1	0.499914	0	0	0.220973
8-aminoguanine	0.996233	1	0.998909	1	0.994055	0.996441	0.426316	0.998557	0.996441	1	1	1	0.996441	1	0.998381
8-chloro-4-methyl-1,4,4a,5,6,10b-hexahydro-2h-benzo[f]quinolin-3-one	0.680447	0.04891	0.997011	1	1	1	0.30899	0.999286	1	1	1	0.997541	1	1	0.891666
8-chloro-4,10b-dimethyl-1,4,4a,5,6,10b-hexahydro-2h-benzo[f]quinolin-3-one	0.680447	0.04891	0.997011	1	1	1	0.30899	0.999286	1	1	1	0.997541	1	1	0.891666
8-cyclohexyl-2,6-diphenyl-9h-purine	1	0.935862	1	1	0.993817	1	0.580078	0.998471	1	1	1	0.999432	1	1	0.999811
8-cyclopentyl-1,3-dipropyl-3,7-dihydro-purine-2,6-dione	1	0.998435	0.999441	1	0.968266	1	0.625587	0.997401	1	1	1	0.999202	1	1	0.999548
8-dibenzothiophen-4-yl-3-morpholin-4-yl-chromen-4-one	0.948758	0.427891	0.999992	1	1	1	0.41712	0.999286	1	1	0.8	0.993723	1	1	0.980824
8-hydroxy-6h-benzo[f][1,3]dioxolo[4',5':4,5]benzo[1,2,3-cd]indol-5-one	0.99904	0.903564	0.990863	1	0.966712	1	0.529685	1	1	1	1	0.999213	1	1	0.996372
8-hydroxy-7a-methyl-4,5,5a,5b,6,7,7a,8,9,10,10a,10b,11,12-tetradecahydro-3h-cyclopenta[5,6]naphtho[1,2-d]azepin-2-one	0.776795	0.214784	0.999997	0	0.002994	0	0.149839	0.999286	0	0	0.3	0.407436	0	1	0.728076
8-methoxy-2-trifluoromethyl-quinoline-5-carboxylic acid (3,5-dichloro-pyridin-4-yl)-amide	0.689329	0.15637	0.993927	0	1	1	0.286506	0.999286	1	1	0.9	0.218921	1	1	0.634059
8-oh-manzamine a	0.991312	0.887742	0.895233	1	1	1	0.470374	0.999286	1	0	0.3	0.499561	1	1	0.795369
8-phenyl-1,3-dimethylxanthine	1	0.96737	0.999906	1	0.999476	1	0.644717	0.999286	1	1	1	0.999033	1	1	0.999646
8-prenylnaringenin	0.057473	0.628602	0.002283	0	0.00122	0	0.411746	0	0	0	0	0.003243	0	0	0.021
9-(7h-pyrrolo[2,3-d]pyrimidin-4-yl)-2,3,4,4a,9,9a-hexahydro-1h-carbazole	0.999299	0.937727	0.991048	1	0.999476	1	0.544669	0.999286	1	1	1	0.999033	1	1	0.99646
9-amino-1,2,3,4-tetrahydro-acridin-3-ol	0.997365	0.375522	0.998594	1	1	1	0.445619	0.999286	1	1	1	0.993723	1	1	0.996561
9-n-ethyl-8-ethoxy-manzamine a	0.991312	0.887742	0.895233	1	1	1	0.470374	0.999286	1	0	0.3	0.499561	1	1	0.795369
9-phenyl-nonanoic acid hydroxyamide	0.816674	0.370359	0.099328	1	0.763221	1	0.037649	0.999244	1	0	0.1	1	1	0	0.638667
9,10,11,12,-tetrahydro-9,12-epoxy-1h-diindolo(1,2,3-fg:3',2',1'-kl)pyrrolo(3,4-i)(1,6)benzodiazocine-1,3(2h)-dione	0.030764	0.666085	7.3e-05	0	0.00122	0	0.471154	0	0	0	0	0.003654	0	0	0.011497
a-(amino-((4-aminophenyl)thio)methylene)-2-(trifluoromethyl)benzeneacetonitrile	0.401874	0.907864	0.000302	0	0.00122	0	0.492197	0	0	0	0	0.103243	0	0	0.168473
a-224940	1	0.996664	0.99976	1	0.960545	1	0.605847	0.99731	1	1	1	0.999194	1	1	0.999651
a-313326	0.765252	0.999866	0.973079	1	0.951424	1	0.52944	0.998596	1	1	0.9	1	1	1	0.912777
a-348441	0.925007	0.209534	0.001517	0	0.029373	0.00141	0.564579	1	0.00141	1	0.2	0.000126	0.00141	0	0.308883
a-357300	0.993207	1	0.999447	1	0.989434	1	0.551269	1	1	1	1	1	1	1	0.997551
a-45594	0.007321	0.809392	0.225739	0	0.00122	0	0.507496	0	0	0	0	0.030012	0	0	0.087691
a-62176	0.24475	0.999837	0.68268	0	0.215432	0	0.838174	0.030303	1	0	0.5	0.5	0	1	0.47581
a-641359	0.999996	0.991853	0.99999	1	0.966712	1	0.694939	1	1	1	1	0.998577	1	1	0.999521
a-64718	1	0.999201	0.999894	1	0.988964	1	0.614658	0.999267	1	1	1	0.999511	1	1	0.999802
a-69412	0.816674	0.370359	0.099328	1	0.763221	1	0.037649	0.999244	1	0	0.1	1	1	0	0.638667
a-740003	0.964209	0.991455	0.999943	1	0.98913	1	0.058871	0.999237	1	1	1	0.996986	1	1	0.987046
a-80040	0.999261	0.965042	0.99998	1	0.938615	1	0.640362	1	1	1	1	0.997794	1	1	0.999012
a-804598	0.978907	0.978225	0.999995	1	1	1	0.073947	0.997356	1	1	1	0.999522	1	1	0.992808
aal-993	0.999969	0.993974	0.999984	1	0.999476	1	0.748547	0.999286	1	1	1	0.999033	1	1	0.999662
ablukast	0.000518	0.526382	6.4e-05	0	0.00122	0	0.399661	0	0	0	0	0.003654	0	0	0.001412
ABT-102	0.086252	0.92658	5.2e-05	0	0.145783	0	0.724697	0.013699	0	0	0	0.002038	0	0	0.029447
abt-702	0.391625	0	7e-06	0	0.296685	1	0	0	0	1	0.8	0.400335	1	0	0.263989
abt-770	0.999493	0.47079	0.999614	1	1	1	0.477084	0.999286	1	1	1	0.995262	1	1	0.998123
abt-839	0.024538	0.107853	7.4e-05	0	0.051587	0.013889	0.375641	0.020408	0.017143	0	0	0.0021	0.013889	0	0.008904
ABT-869	0.999985	0.991758	0.999978	1	0.999476	1	0.743548	0.999286	1	1	1	0.999033	1	1	0.999665
abyssinone ii	0.345266	0.500198	0.001558	0	0.00122	0	0.419822	0	0	0	0	0.0021	0	0	0.116308
abyssinone iii	0.010771	0.088551	0.00058	0	0.506944	0.013889	0.385282	0.020408	0.017143	0	0	0.009425	0.013889	0	0.006926
abyssinone vi	0.345266	0.500198	0.001558	0	0.00122	0	0.419822	0	0	0	0	0.0021	0	0	0.116308
ac-nle-c[asp-his-dnal(2')-pro-trp-lys]-nh2	1	0.963142	0.999891	1	0.999476	1	0.617783	0.999286	1	1	1	0.999033	1	1	0.999641
ac-yvad-cho	0.045602	0.139669	6.7e-05	0	0.051587	0.013889	0.460645	0.020408	0.017143	0	0	0.001633	0.013889	0	0.015768
aceclofenac	0.998835	0.911077	0.989567	1	0.999476	1	0.496495	0.999286	1	1	1	0.997337	1	1	0.995247
acetic acid (3s,3ar,5bs,6r)-6-methoxymethyl-3a,5b-dimethyl-3-(r)-oxo-8,11-dioxo-2,3,3a,4,5,5b,11,11b-octahydro-1h,6h,8h-7,10-dioxa-cyclopenta[j]acephenanthrylen-5-yl ester	0.023969	0.669103	0.000549	0	0.00122	0	0.475927	0	0	0	0	0.0021	0	0	0.008873
acridine orange	0.934978	0.269131	0.999998	1	0.502994	1	0.183161	0.999286	1	1	0.5	0.507321	1	1	0.814099
acridine-4-carboxylic acid (2-dimethylamino-ethyl)-amide	0.009693	0.870416	0.999107	0	0.00122	0	0.465365	0	0	0	0	0.1	0	0	0.3696
actinoplanic acid a	0.024538	0.107853	7.4e-05	0	0.051587	0.013889	0.375641	0.020408	0.017143	0	0	0.0021	0.013889	0	0.008904
adamantan-2-ol	0.000113	0.073284	7e-05	0	0.001446	0	0.203129	0	0	0	0	0.000884	0	0	0.000356
addisofuran a	0.345266	0.500198	0.001558	0	0.00122	0	0.419822	0	0	0	0	0.0021	0	0	0.116308
adenosine diphosphate	0.008457	0.184153	4.7e-05	0	0.03229	0	0.478374	0	0	0	0	0.0013	0	0	0.003268
adibendan	0.882959	0.204802	0.997649	1	1	1	0.342552	0.999286	1	1	1	0.608268	1	1	0.829625
adociaquinone b	0.737145	0.155791	0.999998	1	1	1	0.157616	0.999286	1	1	1	0.995928	1	1	0.911024
ads-102550	0.670675	0.087458	0.998884	0	1	1	0.133647	0.999286	1	0	0.9	0.463215	1	1	0.710925
ads-102891	1	0.959977	0.999976	1	0.966915	1	0.603607	1	1	1	1	0.998974	1	1	0.99965
ads-103253	1	0.967431	0.999636	1	0.999476	1	0.613119	0.999286	1	1	1	0.999033	1	1	0.999556
ads-103254	1	0.996664	0.99976	1	0.960545	1	0.605847	0.99731	1	1	1	0.999194	1	1	0.999651
ads-103255	1	0.959977	0.999976	1	0.966915	1	0.603607	1	1	1	1	0.998974	1	1	0.99965
ads-103294	1	0.959977	0.999976	1	0.966915	1	0.603607	1	1	1	1	0.998974	1	1	0.99965
ads-103316	1	0.959977	0.999976	1	0.966915	1	0.603607	1	1	1	1	0.998974	1	1	0.99965
ag-014344	0.999579	0.781942	0.999978	1	0.912073	1	0.647828	1	1	1	1	0.997794	1	1	0.999117
ag-028262	0.998955	0.995506	1	1	0.992241	1	0.79313	1	1	1	1	0.999441	1	1	0.999465
ag-525	0.027894	0.835532	0.000293	0	0.00122	0	0.494285	0	0	0	0	0.0021	0	0	0.010096
agn-194204	0.927061	0.266926	0.01004	1	0.001865	0	0.641908	0	0	0	0.1	0.698221	0	0	0.545108
agn-34	0.015316	0.195046	4.7e-05	0	0.03229	0	0.480392	0	0	0	0	0.0013	0	0	0.005554
al-6619	0.96533	0.694746	0.99935	1	0.930826	1	0.161165	1	1	1	1	0.999573	1	1	0.988084
albafuran a	0.002201	0.146379	3.2e-05	0	0.03229	0	0.479849	0	0	0	0	0.0013	0	0	0.001178
albanol a	6.1e-05	0.895699	1e-06	0	0.002283	0	0.214624	0.001321	0	0	0	0.001005	0	0	0.000355
alcuronium	0.006208	0.044064	0	0	0.037701	0	0.089205	0	0	0	0	0.002525	0	0	0.002911
allantodapsone	0.999726	0.58619	0.999998	1	1	1	0.471702	0.999286	1	1	1	0.995027	1	1	0.998251
Allosamidin	0.948857	0.111788	0.999998	1	1	1	0.083384	0.999286	1	1	1	0.995176	1	1	0.981344
Alogliptin	0.000268	0.158443	0.000212	0	0.002994	0	0.260783	0	0	0	0	0.003654	0	0	0.001378
aloisine b	0.005705	0.751767	0.000287	0	0.00122	0	0.509836	0	0	0	0	0.0021	0	0	0.002697
alpha-conidendrin	0.000134	0.088683	2.3e-05	0	0.030828	0.001357	0.217779	0	0.001357	0	0	0.000128	0.001357	0	9.5e-05
alpha-cyano-(3,4-dihydroxy)-n-benzylcinnamide	1	0.973354	0.9997	1	0.999476	1	0.646241	0.999286	1	1	1	0.999033	1	1	0.999577
alpha-cyano-3-ethoxy-4-hydroxy-5-phenylthiomethylcinnamamide	0.999987	0.999876	0.999962	1	0.999476	1	0.736882	0.999254	1	1	1	0.999543	1	1	0.999831
Alrestatin	0.905185	0.026104	0.997963	1	1	1	0.380321	0.999286	1	1	1	0.997541	1	1	0.966896
ALX-5407	0.951261	0.166815	0.958648	1	0.992063	1	0.062408	0.998671	1	1	1	0.990046	1	1	0.966651
am-2s	0.999569	0.970649	0.99988	1	0.971491	1	0.473354	0.999123	0.991379	1	1	0.995953	1	1	0.998467
am580	0.006222	0	0	0	0.001458	0	1e-06	0.000893	0.001062	0	0	0.001012	0	0	0.002411
ambroxol	0.003475	0.014235	0.001282	0	0.002955	0	0.012658	0	0	0	0	0.00077	0	0	0.001842
amentoflavone	0.018217	0.115477	0.000334	0	0.051587	0.013889	0.445507	0.020408	0.017143	0	0	0.003654	0.013889	0	0.007401
amg-0309	0.998955	0.995506	1	1	0.992241	1	0.79313	1	1	1	1	0.999441	1	1	0.999465
amg-221	0.045684	0.654573	0.000338	0	0.481132	0	0.647987	0	0.017143	0	0	0	0	0	0.015341
amg-5445	0.060052	0.953264	0.000236	0	0.00122	0	0.686962	0	0	0	0	0.001616	0	0	0.020635
amg-548	0.998945	0.916418	0.986595	1	0.999476	1	0.512352	0.999286	1	1	1	0.977337	1	1	0.987626
amg-6168	0.998955	0.995506	1	1	0.992241	1	0.79313	1	1	1	1	0.999441	1	1	0.999465
amg-628	0.086252	0.92658	5.2e-05	0	0.145783	0	0.724697	0.013699	0	0	0	0.002038	0	0	0.029447
amg-7160	0.060052	0.953264	0.000236	0	0.00122	0	0.686962	0	0	0	0	0.001616	0	0	0.020635
amiglumide	1	0.999201	0.999894	1	0.988964	1	0.614658	0.999267	1	1	1	0.999511	1	1	0.999802
Aminoguanidine	0.735675	0.269023	0.999509	0	0.002994	0	0.315148	0.999286	0	0	0.3	0.105344	0	1	0.61351
amperozide	0.373377	0.079794	0.89779	1	1	1	0.245342	0.999286	1	1	0.7	0.856144	1	1	0.709103
analogue a	6.4e-05	0.04702	2.7e-05	0	0.039259	0	0.176322	0	0	0	0	0.000388	0	0	0.00016
androstenedione	0.097613	0.073994	8.7e-05	0	0.051587	0.013889	0.349238	0.020408	0.017143	0	0	0.005577	0.013889	0	0.034425
angelicin	0.166942	0.873729	7.8e-05	0	0.00122	0	0.563651	0	0	0	0	0.003243	0	0	0.056754
anthralin	0.816674	0.370359	0.099328	1	0.763221	1	0.037649	0.999244	1	0	0.1	1	1	0	0.638667
antimycin a	0.998835	0.911077	0.989567	1	0.999476	1	0.496495	0.999286	1	1	1	0.997337	1	1	0.995247
ap-2243	0.056169	0.093468	8.8e-05	0	0.051587	0.013889	0.401469	0.020408	0.017143	0	0	0.003654	0.013889	0	0.01997
ap-23451	0.999803	0.995919	0.999997	1	0.999476	1	0.765683	0.999286	1	1	1	0.999033	1	1	0.999611
ap-23464	1	0.967882	0.999858	1	0.999476	1	0.646604	0.999286	1	1	1	0.999033	1	1	0.99963
ap-24163	0.999803	0.995919	0.999997	1	0.999476	1	0.765683	0.999286	1	1	1	0.999033	1	1	0.999611
apamin	0.027894	0.835532	0.000293	0	0.00122	0	0.494285	0	0	0	0	0.0021	0	0	0.010096
aphidicolin	0.984333	0.154605	0.999998	1	1	1	0.071697	0.999286	1	1	1	0.995176	1	1	0.993169
apicidin	0.943811	0.40333	0.999743	1	0.981132	1	0.324332	0.999286	1	1	1	0.983275	1	1	0.97561
aplysiillin a	1	0.967614	0.999861	1	0.999476	1	0.652599	0.999286	1	1	1	0.999033	1	1	0.999631
apogossypol	0.998487	0.533305	0.999997	1	1	1	0.492392	0.999286	1	1	1	0.995027	1	1	0.997837
apratastat	0.273975	0.526483	0.012251	0	0.981132	1	0.482523	0.999286	1	1	1	0.190726	1	0	0.158984
ar-129330	1	0.970644	0.999842	1	0.999476	1	0.659199	0.999286	1	1	1	0.999033	1	1	0.999625
ar-c102222	0.083415	0.555024	0.239168	0	0.00122	0	0.406811	0	0	0	0	0.000466	0	0	0.107683
ar-c133057xx	0.735675	0.269023	0.999509	0	0.002994	0	0.315148	0.999286	0	0	0.3	0.105344	0	1	0.61351
ar-c73346xx	0.896026	0.03229	0.997908	1	1	1	0.35027	0.999286	1	1	1	0.997541	1	1	0.963825
ar-ho29953xx	0.15025	0.028597	0.997967	1	1	1	0.410963	0	1	1	0.6	0.903791	1	1	0.684002
ar-ho47108	0.000258	0.126312	0.00011	0	0.002994	0	0.203996	0	0	0	0	0.003654	0	0	0.001341
arc-1027	1	0.967306	0.99975	1	0.999476	1	0.65338	0.999286	1	1	1	0.999033	1	1	0.999594
arc-1031	0.999967	0.941131	0.998289	1	0.999476	1	0.587654	0.999286	1	1	1	0.999033	1	1	0.999096
arc-1034	0.999967	0.941131	0.998289	1	0.999476	1	0.587654	0.999286	1	1	1	0.999033	1	1	0.999096
arcyiaflavin a	0.223106	0.919873	0.00022	0	0.00122	0	0.608408	0	0	0	0	0.002759	0	0	0.075362
Arecoline	1	0.999935	0.999403	1	0.941622	1	0.662521	0.996449	1	1	1	0.999614	1	1	0.999672
arg-pro-lys-pro-gln-gln-phe-phe-gly-leu-met-nh2(substance p)	1	0.984625	0.999875	1	0.981987	1	0.593063	0.999251	1	1	1	1	1	1	0.999958
aristolactam i	0.999419	0.915219	0.996361	1	0.966712	1	0.548806	1	1	1	1	0.999213	1	1	0.998331
ARRY-797	0.989679	0.876353	0.874649	1	0.988155	1	0.509023	1	1	1	1	0.899637	1	1	0.921322
articulatidin	0.001581	0.070609	2e-05	0	0.001255	0	0.157527	0.001825	0.001745	0	0	0.006843	0	0	0.002814
artorigidin a	0.917205	0.963002	0.944087	1	0.5	1	0.475669	0	1	1	0.5	0.299476	1	1	0.720256
as-1397	0.999576	0.980104	0.996437	1	0.98366	1	0.66794	0.998521	1	1	1	0.996796	1	1	0.997603
as-1617612	0.543607	0.344695	0.999998	1	0.981132	1	0.260236	0.999286	1	1	1	0.703264	1	1	0.748956
as-1810722	0.543607	0.344695	0.999998	1	0.981132	1	0.260236	0.999286	1	1	1	0.703264	1	1	0.748956
askendoside b	0.982254	0.209752	0.999998	1	1	1	0.062795	0.999286	1	1	0.8	0.995176	1	1	0.992476
asn01107570	0.998955	0.995506	1	1	0.992241	1	0.79313	1	1	1	1	0.999441	1	1	0.999465
asn06356088	0.998955	0.995506	1	1	0.992241	1	0.79313	1	1	1	1	0.999441	1	1	0.999465
asp-met-his-asp-phe-phe-val-gly-leu-met-nh2	1	0.984625	0.999875	1	0.981987	1	0.593063	0.999251	1	1	1	1	1	1	0.999958
AT-9283	0.999999	0.959687	0.999941	1	0.840932	1	0.660826	1	1	1	1	0.698789	1	1	0.899576
atc-0175	1	0.963609	0.999866	1	0.999476	1	0.624657	0.999286	1	1	1	0.999033	1	1	0.999633
atosiban	1	0.995732	0.999419	1	0.956845	1	0.576725	1	1	1	1	0.999312	1	1	0.999577
azaline b	1	0.997313	0.999895	1	0.967465	1	0.620228	0.99847	1	1	1	1	1	1	0.999965
azd-5438	0.004794	0.189636	7.9e-05	0	0.001865	0	0.555902	0	0	0	0	0.0013	0	0	0.002058
AZD0530	0.999999	0.99119	0.999989	1	0.966712	1	0.663224	1	1	1	1	0.999364	1	1	0.999784
Azilsartan	1	0.99973	0.999819	1	0.96295	0.997951	0.617711	0.997741	1	1	1	0.999342	0.997951	1	0.999721
Bafilomycin A1	0.985052	0.999999	0.999484	1	0.989434	1	0.115232	1	1	1	1	0.999573	1	1	0.994703
baicalin	0.13698	0.277477	0.016159	0	0.00122	0	0.25507	0	0	0	0	0.003654	0	0	0.052264
barasertib	0.999903	0.929726	0.996719	1	0.999476	1	0.551306	0.999286	1	1	1	0.999033	1	1	0.998552
bas01024712	1	0.999961	0.999156	1	0.982856	1	0.584027	0.999287	1	1	1	1	1	1	0.999719
bas09538005	0.998955	0.995506	1	1	0.992241	1	0.79313	1	1	1	1	0.999441	1	1	0.999465
bay 11-7085	1	0.956406	0.999869	1	0.999476	1	0.59167	0.999286	1	1	1	0.999033	1	1	0.999634
bay-11-7082	0.917205	0.963002	0.944087	1	0.5	1	0.475669	0	1	1	0.5	0.299476	1	1	0.720256
bay-19-4789	0.986853	1	0.999949	1	0.976954	1	0.473098	0.99926	1	1	1	0.99881	1	1	0.995204
bay-38-1315	0.986853	1	0.999949	1	0.976954	1	0.473098	0.99926	1	1	1	0.99881	1	1	0.995204
bay-507952	0.010205	0.547051	0.999829	0	0.066755	0	0.603165	0.023952	0	0	0	0.00119	0	0	0.337075
bay-579352	0.998955	0.995506	1	1	0.992241	1	0.79313	1	1	1	1	0.999441	1	1	0.999465
bay-613606	0.999987	0.956804	0.996044	1	0.999476	1	0.585079	0.999286	1	1	1	0.999033	1	1	0.998355
bb-1101	0.083951	0.354959	0.832803	0	0.571429	1	0.413961	0	0	0	0	0.105344	1	0	0.3407
bb-16	0.814271	0.931928	0.023835	0	0.5	0	0.562091	0.999286	0	0	0	0.401996	0	1	0.413367
Bb-3497	0.999583	0.448426	0.999659	1	1	1	0.471992	0.999286	1	1	1	0.995262	1	1	0.998168
bb-350	1	0.999991	0.998177	1	0.996214	1	0.991901	1	1	1	1	0.999498	1	1	0.999225
bengamide a	0.867287	0.03422	0.997868	1	1	1	0.340882	0.999286	1	1	1	0.997541	1	1	0.954232
Benzbromarone	6.2e-05	0	6e-06	0	0.382819	0	1e-06	0	0	0	0	0.00077	0	0	0.000279
benzene-1,4-disulfonic acid 1-amide 4-[(3-chloro-1h-indol-7-yl)-amide]	0.969075	0.447872	0.999454	1	0.973424	1	0.125155	0.997082	1	1	1	0.997382	1	1	0.988637
benzethonium chloride	0.330763	0.819543	8.2e-05	0	0.00122	0	0.496316	0	0	0	0	0.003654	0	0	0.111499
Benzhydroxamic Acid	0.691604	0.078412	0.99863	1	1	1	0.011187	0.999253	0.972222	1	1	1	1	1	0.896744
benzo[1,4]dioxin-2-ylmethyl-[2-(2,6-dimethoxy-phenoxy)-ethyl]-amine	0.987588	0.984249	0.999999	1	0.746603	1	0.904555	0.998594	1	1	1	0.999902	1	1	0.99583
benzofuran-2-carboxylic acid (2-{4-[benzyl-(2-hydroxycarbamoyl-4,6-dimethyl-phenyl)-sulfamoyl]-phenoxy}-ethyl)-amide	0.999616	0.408845	0.999706	1	1	1	0.460959	0.999286	1	1	1	0.994331	1	1	0.997884
benzoic acid 4-((s)-2-{(s)-2-[(azepane-1-carbonyl)-amino]-4-methyl-pentanoylamino}-2-tert-butoxycarbonyl-ethyl)-phenyl ester	0.999955	0.999992	0.999608	1	0.966286	0.998978	0.861911	0.997786	0.998978	1	1	0.999365	0.998978	1	0.999643
benzoic acid 4-((s)-2-{(s)-2-[(azepane-1-carbonyl)-amino]-4-methyl-pentanoylamino}-2-tert-butylcarbamoyl-ethyl)-phenyl ester	0.999748	0.999985	0.99997	1	0.99947	1	0.821312	1	1	1	1	0.999683	1	1	0.9998
benzoquinone	0.998535	0.662989	0.999993	1	1	1	0.622003	0.999286	1	1	1	0.995027	1	1	0.997852
benzothiazyl disulfide	0.444632	0.896569	0.026287	0	0.00122	0	0.517951	0	0	0	0	0.003243	0	0	0.158054
benzyl 2-(2-methyl-1,3-dioxolan-2-yl)-2-((3s,4r)-2-oxo-3-((4s)-2-oxo-4-phenyltetrahydrofuran-3-yl)-4-styrylazetidin-1-yl)acetate	1	0.999647	0.999937	1	0.999169	0.998974	0.557248	0.999265	0.998974	1	1	0.999679	0.998974	1	0.999872
benzyl-[2-(4-methyl-piperazin-1-yl)-quinazolin-4-yl]-amine	0.903533	0.406634	0.860134	1	0.986601	1	0.040021	0.108108	0.002364	1	0.3	0.798642	1	1	0.854103
berberine chloride	0.0057	0.679458	6.6e-05	0	0.00122	0	0.480125	0	0	0	0	0.003654	0	0	0.00314
bergamottin	7.4e-05	0.073124	0.000324	0	0.06043	0.001422	0.204652	0	0	0	0	0.001067	0.001422	0	0.000488
berkeleyamide a	0.999027	0.539627	0.999975	1	1	1	0.525018	0.999286	1	1	1	0.994331	1	1	0.997778
Besonprodil	0.015392	0.602622	0.001863	0	0.00122	0	0.437246	0	0	0	0	0.0021	0	0	0.006452
Bestatin	0.076594	0.093626	8.5e-05	0	0.051587	0.013889	0.201722	0.020408	0.017143	0	0	0.012683	0.013889	0	0.029787
beta-estradiol 3-benzoate	0.190756	0.515215	0.000132	0	0.00122	0	0.391624	0	0	0	0	0.003654	0	0	0.064847
beta-sitosterol	0.553765	0.060131	0.993962	1	1	1	0.286314	0.999286	1	1	1	1	1	1	0.849242
betrixaban	0.908876	0.974773	0.233667	1	0.5	0	0.668195	0.999286	0	0	0.5	0.400263	0	0	0.514269
BI 201335	0.841661	0.167999	0.999995	1	1	1	0.261381	0.999286	1	1	1	0.897851	1	1	0.913169
bi-32169	0.381124	0.920626	0.000614	0	0	0	0.48485	0	0	0	0	0.102777	0	1	0.161505
bi-78d3	0.997907	0.907471	0.975761	1	0.999476	1	0.493257	0.999286	1	1	1	0.878685	1	1	0.950784
bi-90h10	0.997907	0.907471	0.975761	1	0.999476	1	0.493257	0.999286	1	1	1	0.878685	1	1	0.950784
bi-90h8	0.997907	0.907471	0.975761	1	0.999476	1	0.493257	0.999286	1	1	1	0.878685	1	1	0.950784
bi-90h9	0.997907	0.907471	0.975761	1	0.999476	1	0.493257	0.999286	1	1	1	0.878685	1	1	0.950784
bi-98a10	0.997907	0.907471	0.975761	1	0.999476	1	0.493257	0.999286	1	1	1	0.878685	1	1	0.950784
bi-9c11	0.986005	0.082411	0.999984	1	1	1	0.116636	0.999286	1	1	1	0.996794	1	1	0.994261
bibp-3226	1	0.970154	0.999932	1	0.966712	1	0.596961	1	1	1	1	0.999213	1	1	0.999715
BIBW 2992	1	0.993424	0.999998	1	0.961791	1	0.698534	1	1	1	1	0.999163	1	1	0.99972
bilobetin	0.545443	0.999472	0.999483	1	0.723459	1	0.634829	1	1	1	1	0.604	1	1	0.716309
bim1	0.026008	0.391214	0.000205	0	0.001865	0	0.602941	0	0	0	0	0.0013	0	0	0.009171
bisphenol a	0.009473	0.217651	0.000538	0	0.002994	0	0.286841	0	0	0	0	0.003654	0	0	0.004555
bm-13505	0.778898	0.916515	0.01065	0	0	0	0.494524	0	0	0	0	0.202909	0	1	0.330819
bms-1	0.373377	0.079794	0.89779	1	1	1	0.245342	0.999286	1	1	0.7	0.856144	1	1	0.709103
bms-181316	0.999935	0.99999	0.999539	1	0.97412	1	0.974446	0.999238	1	1	1	0.997747	1	1	0.999074
bms-189090	0.999935	0.99999	0.999539	1	0.97412	1	0.974446	0.999238	1	1	1	0.997747	1	1	0.999074
bms-189323	1	0.96242	0.999884	1	0.999476	1	0.622199	0.999286	1	1	1	0.999033	1	1	0.999639
bms-193885	1	0.96242	0.999884	1	0.999476	1	0.622199	0.999286	1	1	1	0.999033	1	1	0.999639
bms-243117	0.999751	0.986456	0.999959	1	0.985341	1	0.71112	0.999283	1	1	1	0.999876	1	1	0.999862
bms-245782	1	0.999991	0.999227	1	0.980805	1	0.836478	0.997619	1	1	1	0.999901	1	1	0.999709
bms-269223	0.001598	0.318858	7.6e-05	0	0.00122	0	0.335839	0	0	0	0	0.003654	0	0	0.001776
bms-275291	0.999493	0.47079	0.999614	1	1	1	0.477084	0.999286	1	1	1	0.995262	1	1	0.998123
bms-284640	0.832834	0.187963	0.999998	1	1	1	0.251883	0.999286	1	1	1	0.995928	1	1	0.94292
bms-316810	0.024538	0.107853	7.4e-05	0	0.051587	0.013889	0.375641	0.020408	0.017143	0	0	0.0021	0.013889	0	0.008904
bms-337197	0.994614	1	0.999997	1	0.988006	1	0.497145	0.999265	1	1	1	0.999543	1	1	0.998052
bms-344577	0.167156	0.920918	0.070432	0	0.094122	0	0.79017	0	0	0	0	0.000362	0	0	0.079317
bms-354326	0.099486	0.396877	8.8e-05	0	0.00122	0	0.350339	0	0	0	0	0.003654	0	0	0.034409
bms-363131	0.099486	0.396877	8.8e-05	0	0.00122	0	0.350339	0	0	0	0	0.003654	0	0	0.034409
BMS-488043	0.000113	0.073284	7e-05	0	0.001446	0	0.203129	0	0	0	0	0.000884	0	0	0.000356
bms-540215	0.999483	0.958125	0.995557	1	0.999476	1	0.630776	0.999286	1	1	1	0.999033	1	1	0.998024
bms-577098	0.000551	0.683826	6.7e-05	0	0.00122	0	0.439918	0	0	0	0	0.003654	0	0	0.001424
BMS-582664	0.000258	0.126312	0.00011	0	0.002994	0	0.203996	0	0	0	0	0.003654	0	0	0.001341
bms-587101	0.018258	0.683856	0.000767	0	0.001865	0	0.691767	0	0	0	0	0.003293	0	0	0.007439
bms-645737	0.999483	0.958125	0.995557	1	0.999476	1	0.630776	0.999286	1	1	1	0.999033	1	1	0.998024
bms-694153	0.00011	0.07258	0.000291	0	0.031501	0	0.217067	0	0	0	0	0.001471	0	0	0.000624
bms-754807	0.009512	0.352357	9.8e-05	0	0.00122	0	0.366791	0	0	0	0	0.003654	0	0	0.004421
bms-806	0.0003	0.840435	0	0	0.003363	0.002132	0.197301	0.004392	0.002132	0	0	0.003543	0.002132	0	0.001281
bmy-44621	0.037105	0.999924	0.005097	0	0.110053	0.008746	0.888787	0.011905	0.008746	0	0	0.006046	0.008746	0	0.016083
bolinaquinone	0.896026	0.03229	0.997908	1	1	1	0.35027	0.999286	1	1	1	0.997541	1	1	0.963825
Bosutinib	1	0.978024	0.999935	1	1	1	0.685406	0.999286	1	1	1	0.999033	1	1	0.999656
bp-897	1	0.999976	0.996207	1	0.981528	1	0.581676	0.996358	1	1	1	0.999413	1	1	0.99854
bq-123	1	0.942651	0.999879	1	0.999476	1	0.533221	0.999286	1	1	1	0.999033	1	1	0.999637
brevetoxin b	0.387973	0.969355	0.002536	0	0	0	0.620844	0	0	0	0.2	0.000233	0	0	0.130247
brl-32872	0.976243	0.983175	0.98366	1	1	1	0.645515	0.999286	1	1	1	0.899476	1	1	0.953126
brl-37344	1	0.996144	0.999509	1	0.948867	1	0.621256	0.997155	1	1	1	0.99981	1	1	0.999773
brodimoprim	5.3e-05	0	4.4e-05	0	0.104686	0	0	0	0	0	0	0.000312	0	0	0.000136
brofaromine	0.889857	0.998411	0.999998	1	0.819621	0.996855	0.46091	1	0.996933	1	1	0.999072	0.996855	1	0.962976
bromhexine	0.159917	0.092398	0.002468	0	0	0	0.167738	0	0.017143	0	0	0.106585	0	0	0.089657
bromoloxoprofen	0.012883	0.894923	0.009021	0	0.00122	0	0.49062	0	0	0	0	0.001633	0	0	0.007846
bromopyrogallol red	0.166942	0.873729	7.8e-05	0	0.00122	0	0.563651	0	0	0	0	0.003243	0	0	0.056754
brotizolam	1	0.999991	0.998177	1	0.996214	1	0.991901	1	1	1	1	0.999498	1	1	0.999225
broussonin a	0.009741	0.757182	0.000209	0	0.00122	0	0.441616	0	0	0	0	0.003654	0	0	0.004535
bu-4664l	0.999199	0.539304	0.999308	1	1	1	0.494547	0.999286	1	1	1	0.995262	1	1	0.997923
buddledin a	0.012883	0.894923	0.009021	0	0.00122	0	0.49062	0	0	0	0	0.001633	0	0	0.007846
but-2-ynoic acid [4-(3-bromo-phenylamino)-quinazolin-6-yl]-amide	1	0.985257	0.999887	1	0.999476	1	0.702344	0.999286	1	1	1	0.999033	1	1	0.99964
Butanoic Acid	0.855793	0.919431	0.999482	1	0.938615	1	0.202273	1	1	1	1	0.999573	1	1	0.951616
buxafuranamide	0.997365	0.375522	0.998594	1	1	1	0.445619	0.999286	1	1	1	0.993723	1	1	0.996561
buxaminol a	0.997479	0.513153	0.999847	1	0.993189	1	0.606079	1	1	1	1	0.997794	1	1	0.998373
bw-28c51	0.997365	0.375522	0.998594	1	1	1	0.445619	0.999286	1	1	1	0.993723	1	1	0.996561
bw-373u86	1	0.983954	0.999984	1	0.954298	1	0.673481	0.999263	1	1	1	0.999275	1	1	0.999753
bw-755c	0.059759	0.717624	0.000122	0	0.00122	0	0.425439	0	0	0	0	0.003654	0	0	0.021178
bx-320	0.999976	0.946012	0.998474	1	0.999476	1	0.600111	0.999286	1	1	1	0.999033	1	1	0.999161
c-014c	1	0.978516	0.999801	1	0.999476	1	0.71757	0.999286	1	1	1	0.999033	1	1	0.999611
c-16-(s)-7-methylindolerapamycin	0.195403	0.385606	0.000838	0	0.009801	0	0.683732	0	0	0	0	0.299657	0	0	0.165299
cacospongionolide b	0.993234	1	0.999354	1	0.989434	1	0.556304	1	1	1	1	1	1	1	0.997529
calceolarioside a	0.999996	0.991752	0.99999	1	0.966712	1	0.743949	1	1	1	1	0.998577	1	1	0.999521
calceolarioside b	1	0.986978	0.999906	1	0.999476	1	0.74888	0.999286	1	1	1	0.999033	1	1	0.999646
calicoferol a	0.999996	0.989304	0.999956	1	0.999476	1	0.733811	0.999286	1	1	1	0.999033	1	1	0.999662
callysponginol sulfate a	0.999717	0.399433	0.999726	1	1	1	0.458535	0.999286	1	1	1	0.994331	1	1	0.997925
calmeran	0.987588	0.984249	0.999999	1	0.746603	1	0.904555	0.998594	1	1	1	0.999902	1	1	0.99583
Calyculin A	0.974187	0.100851	0.999993	1	1	1	0.156928	0.999286	1	1	1	0.883671	1	1	0.952617
calyflorenon b	0.384934	0.424383	0.002295	0	0.071429	0	0.472492	0	0	0	0	0.090726	0	0	0.159318
Camptothecin	0.521519	0.941483	0.017685	0	0.5	0	0.576304	0.999286	0	0	0.1	0.302105	0	1	0.280437
candelalide a	0.023382	0.80389	8.2e-05	0	0.00122	0	0.586482	0	0	0	0	0.0021	0	0	0.008521
candelalide b	0.023382	0.80389	8.2e-05	0	0.00122	0	0.586482	0	0	0	0	0.0021	0	0	0.008521
canellin a	0.995758	1	0.999484	1	0.989434	1	0.525502	1	1	1	1	1	1	1	0.998414
canex	0.016482	0.096097	6e-05	0	0.051587	0.013889	0.277347	0.020408	0.017143	0	0	0.003654	0.013889	0	0.006732
cangrelor	1	0.952251	0.999856	1	0.999476	1	0.574084	0.999286	1	1	1	0.999033	1	1	0.99963
Carbenoxolone	0.045684	0.654573	0.000338	0	0.481132	0	0.647987	0	0.017143	0	0	0	0	0	0.015341
carboxylic acid metabolite (e-3174)	1	0.999769	0.999963	1	0.984826	1	0.717874	0.998403	1	1	1	0.999438	1	1	0.9998
carboxylic acid metabolite of celecoxib	0.11457	0.999804	0.000434	0	0.033704	0	0.79768	0	0	0	0	0.00356	0	0	0.039521
cariporide	0.884582	0.144177	0.999998	1	1	1	0.201171	0.999286	1	1	1	0.897851	1	1	0.927477
carzenide	0.939818	0.626007	0.9992	1	0.998768	1	0.128678	1	1	1	1	0.99834	1	1	0.979119
catechol	0.024774	0.660782	0.0007	0	0.001865	0	0.69477	0	0	0	0	0.003293	0	0	0.009589
cc-1088	0.145502	0.075649	0.017503	0	0.017182	0	0.013901	0	0	0	0.1	0.499914	0	0	0.220973
cddo	0.981515	0.09804	0.999998	1	1	1	0.096799	0.999286	1	1	1	0.995176	1	1	0.99223
Cediranib	0.998955	0.995506	1	1	0.992241	1	0.79313	1	1	1	1	0.999441	1	1	0.999465
Celastrol	0.013536	0.770254	0.000297	0	0.00122	0	0.489828	0	0	0	0	0.0021	0	0	0.005311
Celecoxib	0.028839	0.323592	0.000241	0	0.00122	0	0.333861	0	0	0	0	0.003654	0	0	0.010911
cep-5104	0.999938	0.994703	0.999989	1	0.999476	1	0.759389	0.999286	1	1	1	0.999033	1	1	0.999654
cep-6331	0.99993	0.995121	0.99999	1	0.999476	1	0.756767	0.999286	1	1	1	0.999033	1	1	0.999651
cep-6800	0.999579	0.781942	0.999978	1	0.912073	1	0.647828	1	1	1	1	0.997794	1	1	0.999117
ceronapril	0.106438	0	0	0	0.572581	1	0	0.998585	1	0	1	0.004888	1	0	0.037109
cetrimide	0.139785	0.49813	0.000227	0	0.001865	0	0.481649	0	0	0	0	0.000598	0	0	0.04687
cgp-029482	0.997216	0.896043	0.967153	1	0.966712	1	0.515912	1	1	1	1	0.999213	1	1	0.987861
cgp-060476	0.78872	0.817295	0.169705	0	0.00122	0	0.391675	0	0	0	0	0.199561	0	1	0.385996
cgp-062644	0.78872	0.817295	0.169705	0	0.00122	0	0.391675	0	0	0	0	0.199561	0	1	0.385996
cgp-191	0.999987	0.999876	0.999962	1	0.999476	1	0.736882	0.999254	1	1	1	0.999543	1	1	0.999831
cgp-27492	0.094117	0.64007	0.150908	0	0.00122	0	0.477704	0	0	0	0.1	0.030012	0	0	0.091679
cgp-35348	0.009538	0.888139	0.022001	0	0.00122	0	0.565226	0	0	0	0	0.004545	0	0	0.012028
cgp-35582	0.094117	0.64007	0.150908	0	0.00122	0	0.477704	0	0	0	0.1	0.030012	0	0	0.091679
cgp-36216	0.094117	0.64007	0.150908	0	0.00122	0	0.477704	0	0	0	0.1	0.030012	0	0	0.091679
cgp-38560a	0.003594	0	0	0	0.068204	0	0	0	0	0	0	0.000672	0	0	0.001422
cgp-44171a	0.78872	0.817295	0.169705	0	0.00122	0	0.391675	0	0	0	0	0.199561	0	1	0.385996
cgp-53353	0.999987	0.999876	0.999962	1	0.999476	1	0.736882	0.999254	1	1	1	0.999543	1	1	0.999831
cgp-57380	0.996114	0.926722	0.951691	1	0.999476	1	0.536289	0.999286	1	1	1	0.899033	1	1	0.948946
CGP71683A	1	0.952025	0.999869	1	0.999476	1	0.570648	0.999286	1	1	1	0.999033	1	1	0.999634
cgs-12066b	1	0.961289	0.999879	1	0.999476	1	0.614422	0.999286	1	1	1	0.999033	1	1	0.999637
cgs-15943	1	0.971488	0.99991	1	0.999476	1	0.667654	0.999286	1	1	1	0.999033	1	1	0.999648
cgs-22745	0.816674	0.370359	0.099328	1	0.763221	1	0.037649	0.999244	1	0	0.1	1	1	0	0.638667
cgs-250190	1	0.999973	0.999521	1	0.90677	1	0.771498	1	1	1	1	0.999547	1	1	0.999689
cgs-26582	0.96693	0.013058	0.984125	1	0.997449	1	0.004	0.997619	1	1	1	1	1	1	0.983685
cgs-30084	0.989159	0.112258	0.999998	1	1	1	0.103373	0.999286	1	1	1	0.995176	1	1	0.994778
cgs-314447	0.981265	0.998968	0.999484	1	0.989434	1	0.16829	1	1	1	1	0.999573	1	1	0.993441
cgs-35066	0.989159	0.112258	0.999998	1	1	1	0.103373	0.999286	1	1	1	0.995176	1	1	0.994778
chalcone	0.218421	0.31646	0.998974	0	0.481132	0	0.350504	0	0	0	0	0.305344	0	1	0.50758
chf-2819	0.991224	0.89831	0.975484	1	1	1	0.714271	0.999179	1	1	1	0.997448	1	1	0.988052
chlormadinone acetate	0.000333	0.109902	2.9e-05	0	0.03229	0	0.352924	0	0	0	0	0.0013	0	0	0.000554
chlorocyclinone a	0.005726	0.102552	0.001566	0	0.002994	0	0.137391	0	0	0	0	0.003243	0	0	0.003512
chlorodysinosin a	0.999935	0.99999	0.999539	1	0.97412	1	0.974446	0.999238	1	1	1	0.997747	1	1	0.999074
chloropeptin	0.999589	0.947422	0.993314	1	0.999476	1	0.568142	0.999286	1	1	1	0.999033	1	1	0.997312
chlorophenylpiperazine	1	0.996144	0.999509	1	0.948867	1	0.621256	0.997155	1	1	1	0.99981	1	1	0.999773
chloroxylenol	0.281349	0.577377	0.002688	0	0.481132	0	0.514907	0	0.017143	0	0	0.09026	0	0	0.124766
Cholic Acid	1	0.915117	0.999146	1	0.767529	1	0.44052	1	1	1	1	0.90007	1	1	0.966405
ci-1011	0.086323	0.085755	6.1e-05	0	0.051587	0.013889	0.291331	0.020408	0.017143	0	0	0.004023	0.013889	0	0.030136
ci-966	0.987061	0.081311	0.969615	1	1	1	0.136223	0.999286	1	1	1	0.996794	1	1	0.98449
ci-976	0.373377	0.079794	0.89779	1	1	1	0.245342	0.999286	1	1	0.7	0.856144	1	1	0.709103
ci-996	1	0.999769	0.999963	1	0.984826	1	0.717874	0.998403	1	1	1	0.999438	1	1	0.9998
ciglitazone	0.027681	0.631186	7.3e-05	0	0.00122	0	0.451278	0	0	0	0	0.003654	0	0	0.010469
Cilnidipine	0.999748	0.999985	0.99997	1	0.99947	1	0.821312	1	1	1	1	0.999683	1	1	0.9998
cilostamide	0.086046	0.470478	7.9e-05	0	0.00122	0	0.437072	0	0	0	0	0.003654	0	0	0.029926
ciluprevir	0.232468	0.077	6e-05	0	0.051587	0.013889	0.107138	0.020408	0.017143	0	0	0.208353	0.013889	0	0.14696
cis-((1s,3r)-1-isopropyl-3-((3s,4s)-3-methoxytetrahydro-2h-pyran-4-ylamino)cyclopentyl)(4-(4-(trifluoromethyl)pyridin-2-yl)piperazin-1-yl)methanone	1	0.97115	0.999621	1	0.999476	1	0.634773	0.999286	1	1	1	0.999033	1	1	0.999551
cis-(3,3-difluoro-pyrrolidin-1-yl)-[(2s,4s)-(4-(4-pyrimidin-2-yl-piperazin-1-yl)-pyrrolidin-2-yl]-methanone	0.999035	0.661619	0.999992	1	1	1	0.5707	0.999286	1	1	1	0.995262	1	1	0.998096
cis-3-(8-amino-1-(2-phenylquinolin-7-yl)imidazo[1,5-a]pyrazin-3-yl)-1-methylcyclobutanol	1	0.999996	0.999975	1	0.989789	1	0.853216	0.999267	1	1	1	0.999804	1	1	0.999926
cis-4-(piperazin-1-yl)-5,6,7a,8,9,10,11,11a-octahydrobenzofuro[2,3-h]quinazolin-2-amine	1	0.961592	0.999875	1	0.999476	1	0.61545	0.999286	1	1	1	0.999033	1	1	0.999636
citibrasine	0.99997	0.978039	0.999968	1	0.996064	1	0.703435	1	1	1	1	0.997794	1	1	0.999244
citrusinine-i	0.999235	0.438986	0.999995	1	1	1	0.468041	0.999286	1	1	1	0.995027	1	1	0.998086
citrusinine-ii	0.999235	0.438986	0.999995	1	1	1	0.468041	0.999286	1	1	1	0.995027	1	1	0.998086
cl-184005	1	0.999991	0.998177	1	0.996214	1	0.991901	1	1	1	1	0.999498	1	1	0.999225
cl-277082	0.297301	0.093096	6.2e-05	0	0.051587	0.013889	0.185137	0.020408	0.017143	0	0.1	0.005577	0.013889	0	0.10098
cl-82198	0.999616	0.408845	0.999706	1	1	1	0.460959	0.999286	1	1	1	0.994331	1	1	0.997884
cl-999	0.373377	0.079794	0.89779	1	1	1	0.245342	0.999286	1	1	0.7	0.856144	1	1	0.709103
clavatadine a	0.035435	0.789006	0.00029	0	0.066755	0	0.699367	0.023952	0	0	0	0.006873	0	0	0.014199
clematernoside b	1	0.999999	1	1	0.999423	1	1	0.997706	1	1	1	0.999818	1	1	0.999939
clobenpropit	1	0.999931	0.999322	1	0.974639	1	0.676755	0.998288	1	1	1	0.999044	1	1	0.999455
closantel	0.004091	0.658783	7e-05	0	0.00122	0	0.433836	0	0	0	0	0.003654	0	0	0.002605
cmi-977	0.816674	0.370359	0.099328	1	0.763221	1	0.037649	0.999244	1	0	0.1	1	1	0	0.638667
compound with methanesulfonic acid	0.001997	0.111175	6e-06	0	0.038262	0.001368	0.310797	0.002721	0.001368	0	0	0.001713	0.001368	0	0.001239
congo_red	0.112326	0.998066	0.069886	0	0.476572	0	0.567126	0	0	1	0.3	0.389253	0	1	0.190488
corticatic acid a	0.951159	0.413511	0.999997	1	1	1	0.430652	0.999286	1	1	0.9	0.995027	1	1	0.982061
coruleoellagic acid	0.989641	0.995173	0.999484	1	0.989434	1	0.150901	1	1	1	1	0.999573	1	1	0.996232
coumaric acid	0.905185	0.026104	0.997963	1	1	1	0.380321	0.999286	1	1	1	0.997541	1	1	0.966896
cp-105696	1	0.999624	0.998109	1	1	1	0.561582	0.999243	1	1	1	0.999448	1	1	0.999186
cp-135807	0.002151	0.072106	0.000123	0	0.028009	0.003663	0.124385	0.001479	0	0	0	0.001862	0.003663	0	0.001379
cp-154526	0.001997	0.111175	6e-06	0	0.038262	0.001368	0.310797	0.002721	0.001368	0	0	0.001713	0.001368	0	0.001239
cp-166572	0.933567	0.080752	0.992211	1	1	1	0.132051	0.999286	1	1	0.8	0.996794	1	1	0.974191
cp-220629	0.145502	0.075649	0.017503	0	0.017182	0	0.013901	0	0	0	0.1	0.499914	0	0	0.220973
cp-289503	1	0.952703	0.999889	1	0.999476	1	0.574747	0.999286	1	1	1	0.999033	1	1	0.999641
cp-305202	0.003594	0	0	0	0.068204	0	0	0	0	0	0	0.000672	0	0	0.001422
cp-403700	0.996309	1	0.999484	1	0.989434	1	0.490665	1	1	1	1	1	1	1	0.998598
cp-470711	0.933567	0.080752	0.992211	1	1	1	0.132051	0.999286	1	1	0.8	0.996794	1	1	0.974191
CP-547632	1	0.999998	0.999982	1	0.995937	1	0.868241	0.997295	1	1	1	0.999802	1	1	0.999928
cp-55940	1	0.999614	0.999898	1	0.992574	1	0.540766	0.998456	1	1	1	0.999351	1	1	0.99975
cp-640186	0.999275	0.462223	0.999998	1	1	1	0.415242	0.999286	1	1	1	0.995027	1	1	0.9981
CP-690,550	1	0.973629	0.999883	1	0.999476	1	0.650265	0.999286	1	1	1	0.999033	1	1	0.999639
cp-80794	0.003594	0	0	0	0.068204	0	0	0	0	0	0	0.000672	0	0	0.001422
cp-808844	0.999188	0.918861	0.988453	1	0.999476	1	0.519919	0.999286	1	1	1	0.977004	1	1	0.988215
cp-91149	0.373377	0.079794	0.89779	1	1	1	0.245342	0.999286	1	1	0.7	0.856144	1	1	0.709103
crx-526	0.169303	0.826759	0.000371	0	0.090941	0	0.636597	0	0	0	0	0.003509	0	0	0.057728
ct-32228	0.99934	0.577995	0.999998	1	1	1	0.349948	0.999286	1	1	1	0.995027	1	1	0.998122
ct-98014	0.991312	0.887742	0.895233	1	1	1	0.470374	0.999286	1	0	0.3	0.499561	1	1	0.795369
cucurbitacin b	0.479966	0.632874	0.999994	0	0.981132	1	0.414084	0.999286	1	1	1	0.225	1	1	0.56832
cudraflavone b	0.11457	0.999804	0.000434	0	0.033704	0	0.79768	0	0	0	0	0.00356	0	0	0.039521
Curcumin I	0.014923	0.227273	0.936856	0	0.002994	0	0.301484	0	0	0	0	0.204344	0	0	0.385375
cv-11194	1	0.999998	0.999723	1	0.938197	1	1	1	1	1	1	0.999901	1	1	0.999875
cvs-1778	0.03665	0.862408	0.001115	0	0.001865	0	0.708942	0	0	0	0	0.003059	0	0	0.013608
cvt-12012	0.996338	1	0.999484	1	0.989434	1	0.379816	1	1	1	1	1	1	1	0.998607
cyanidin	0.201789	0.100888	0.001143	0	0	0	0.135976	0	0	0	0	0.002044	0	0	0.068325
cyclonataminol	0.997365	0.375522	0.998594	1	1	1	0.445619	0.999286	1	1	1	0.993723	1	1	0.996561
cyclopentyladenosine	1	0.935862	1	1	0.993817	1	0.580078	0.998471	1	1	1	0.999432	1	1	0.999811
Cyclotheonamide A	0.999935	0.99999	0.999539	1	0.97412	1	0.974446	0.999238	1	1	1	0.997747	1	1	0.999074
cytochalasin b	0.00898	0.882288	0.04229	0	0.00122	0	0.619964	0	0	0	0	0.122561	0	0	0.057943
d-butaclamol	0.987588	0.984249	0.999999	1	0.746603	1	0.904555	0.998594	1	1	1	0.999902	1	1	0.99583
d-isofagomine	0.996309	1	0.999484	1	0.989434	1	0.490665	1	1	1	1	1	1	1	0.998598
DAP-81	0.998414	0.898521	0.998706	1	0.922218	1	0.551452	1	1	1	1	0.99957	1	1	0.998897
Dapagliflozin	0.989987	1	0.976147	1	0.989434	1	0.55615	1	1	1	1	1	1	1	0.988711
daph	1	0.982871	0.999898	1	0.999476	1	0.700474	0.999286	1	1	1	0.999033	1	1	0.999644
dcb-3503	0.02404	0.930317	0.047245	0	0.00122	0	0.53	0	0	0	0	0.10115	0	0	0.057478
decursinol	0.997365	0.375522	0.998594	1	1	1	0.445619	0.999286	1	1	1	0.993723	1	1	0.996561
delergotrile	0.999997	0.990454	0.999959	1	0.999476	1	0.709357	0.999286	1	1	1	0.999033	1	1	0.999663
delphinidin	0.996338	1	0.999484	1	0.989434	1	0.379816	1	1	1	1	1	1	1	0.998607
demethyldebromoflustramine b	0.999576	0.980104	0.996437	1	0.98366	1	0.66794	0.998521	1	1	1	0.996796	1	1	0.997603
dequalinium chloride	0.027894	0.835532	0.000293	0	0.00122	0	0.494285	0	0	0	0	0.0021	0	0	0.010096
desethyl amodiaquine	0.000432	0.226727	0.000107	0	0.00122	0	0.274311	0	0	0	0	0.003654	0	0	0.001398
desmethyl-ofloxacin (5%)	0.999994	0.999992	1	1	0.967269	1	0.993032	1	1	1	1	0.999422	1	1	0.999805
devazepide	1	0.999527	0.999979	1	0.973857	1	0.573252	0.998502	1	1	1	0.999014	1	1	0.999664
DG041	0.000203	0.530198	6.5e-05	0	0.00122	0	0.36338	0	0	0	0	0.003654	0	0	0.001307
di-o-methylendiandrin a	0.908125	0.980089	0.08318	0	0.997159	1	0.542917	1	1	1	0.6	0.099274	1	0	0.363526
dihydrochloride	0.037105	0.999924	0.005097	0	0.110053	0.008746	0.888787	0.011905	0.008746	0	0	0.006046	0.008746	0	0.016083
dihydroergocristine mesylate	0.034842	0.866187	0.018201	0	0.00122	0	0.493789	0	0	0	0	0.003408	0	0	0.018817
dilazep	0.987588	0.984249	0.999999	1	0.746603	1	0.904555	0.998594	1	1	1	0.999902	1	1	0.99583
dimethylcryptostrobin	0.825596	0.234041	0.005974	1	0.03229	0	0.606426	0	0	0	0	0.299646	0	0	0.377072
dimethylpinocembrin	0.397152	0.385991	0.00207	0	0	0	0.457823	0	0	0	0.2	0.105344	0	0	0.168189
diperodon	0.987588	0.984249	0.999999	1	0.746603	1	0.904555	0.998594	1	1	1	0.999902	1	1	0.99583
distamycin	0.005847	0.84855	0.795776	0	0.00122	0	0.505638	0	0	0	0	0.004545	0	0	0.268723
disuprazole	0.039833	0.105004	6.7e-05	0	0.051587	0.013889	0.409224	0.020408	0.017143	0	0	0.004023	0.013889	0	0.014641
dmp-802	0.267014	0.390817	0.000325	0	0.00122	0	0.354598	0	0	0	0	0.003654	0	0	0.090331
dmp-811	1	0.999831	0.999965	1	0.987073	1	0.740262	0.998439	1	1	1	0.999475	1	1	0.999813
dodecyl-dimethyl-amine	0.999799	0.998041	0.999993	1	0.5	1	0.79264	1	1	1	1	1	1	1	0.999931
dup-697	1	0.999999	1	1	0.999423	1	1	0.997706	1	1	1	0.999818	1	1	0.999939
dx-600	0.413714	0.092098	0.762483	0	1	1	0.29603	0.999286	1	1	0.9	0.201633	1	1	0.459277
dx-9065a	0.249213	0.999923	0.857302	0	0	0	0.836645	0	0	0	0	0.10441	0	1	0.403642
dysinosin a	0.037105	0.999924	0.005097	0	0.110053	0.008746	0.888787	0.011905	0.008746	0	0	0.006046	0.008746	0	0.016083
e-enedione	0.938954	0.999983	0.996373	1	0.992624	1	0.280194	0.999283	1	1	1	0.99919	1	1	0.978173
edelfosine	1	0.984488	0.999909	1	0.999476	1	0.716044	0.999286	1	1	1	0.999033	1	1	0.999647
edotreotide	1	0.966796	0.999869	1	0.999476	1	0.645858	0.999286	1	1	1	0.999033	1	1	0.999634
ellagic acid	0.689831	0.925758	0.412592	0	0.5	1	0.594102	0	1	0	0.1	0.208693	1	1	0.437039
em-1424	0.905185	0.026104	0.997963	1	1	1	0.380321	0.999286	1	1	1	0.997541	1	1	0.966896
emd-534085	0.999993	0.948907	0.997491	1	0.5	0	0.484505	0.999286	0	0	0.5	0.899033	0	1	0.965506
emd-95885	0.004614	0.144585	3.1e-05	0	0.03229	0	0.463477	0	0	0	0	0.0013	0	0	0.001982
emd-96785	0.884582	0.144177	0.999998	1	1	1	0.201171	0.999286	1	1	1	0.897851	1	1	0.927477
emodin	0.198444	0.757863	0.000511	0	0.001865	0	0.589652	0	0	0	0	0.000598	0	0	0.066517
Enalkiren	0.002072	0	2.1e-05	0	0.080865	0	0	0	0	0	0	0.000581	0	0	0.000891
endiandrin a	0.925007	0.209534	0.001517	0	0.029373	0.00141	0.564579	1	0.00141	1	0.2	0.000126	0.00141	0	0.308883
enkephalin	1	0.999997	0.999977	1	0.993962	1	0.999912	0.997571	1	1	1	0.999711	1	1	0.999896
epoxomicin	0.500861	0.049711	0.994618	0	0.051587	0.013889	0.406715	0.020408	0.017143	0	0.5	0.607268	0.013889	0	0.700916
epristeride	0.680447	0.04891	0.997011	1	1	1	0.30899	0.999286	1	1	1	0.997541	1	1	0.891666
ergocornine	0.090622	0.889467	0.387139	0	0.5	1	0.507925	0	1	1	0.6	0.202997	1	0	0.22692
eriodictyol	0.000258	0.126312	0.00011	0	0.002994	0	0.203996	0	0	0	0	0.003654	0	0	0.001341
ermanin	7.4e-05	0.073124	0.000324	0	0.06043	0.001422	0.204652	0	0	0	0	0.001067	0.001422	0	0.000488
ersentilide	1	0.982497	0.999791	1	0.973537	1	0.596184	1	1	1	1	0.999683	1	1	0.999825
erybreadin b	0.345266	0.500198	0.001558	0	0.00122	0	0.419822	0	0	0	0	0.0021	0	0	0.116308
erystagallin a	0.002201	0.146379	3.2e-05	0	0.03229	0	0.479849	0	0	0	0	0.0013	0	0	0.001178
erythribyssin a	0.345266	0.500198	0.001558	0	0.00122	0	0.419822	0	0	0	0	0.0021	0	0	0.116308
estradiol phosphate	0.999975	0.995141	0.999979	1	0.996678	0.998342	0.845263	0.996719	1	1	1	0.99963	0.998342	1	0.999862
ethisterone	0.925007	0.209534	0.001517	0	0.029373	0.00141	0.564579	1	0.00141	1	0.2	0.000126	0.00141	0	0.308883
ethyl 2-(1-oxo-2-(2-oxo-2-(4-(trifluoromethoxy)phenylamino)ethyl)-1,2-dihydroisoquinolin-5-yloxy)propanoate	0.007321	0.809392	0.225739	0	0.00122	0	0.507496	0	0	0	0	0.030012	0	0	0.087691
etisulergine	0.999997	0.990454	0.999959	1	0.999476	1	0.709357	0.999286	1	1	1	0.999033	1	1	0.999663
eugenin	1	0.999999	1	1	0.999423	1	1	0.997706	1	1	1	0.999818	1	1	0.999939
eutypoid b	0.991312	0.887742	0.895233	1	1	1	0.470374	0.999286	1	0	0.3	0.499561	1	1	0.795369
eutypoid c	0.991312	0.887742	0.895233	1	1	1	0.470374	0.999286	1	0	0.3	0.499561	1	1	0.795369
eutypoid d	0.991312	0.887742	0.895233	1	1	1	0.470374	0.999286	1	0	0.3	0.499561	1	1	0.795369
eutypoid e	0.991312	0.887742	0.895233	1	1	1	0.470374	0.999286	1	0	0.3	0.499561	1	1	0.795369
fantofarone	0.99598	0.986442	0.99819	1	0.999476	1	0.667057	0.999286	1	1	1	0.999476	1	1	0.997882
farganasterol	0.995478	0.98337	0.999823	1	0.999476	1	0.565391	0.999286	1	1	1	0.899476	1	1	0.964926
felbinac	0.012883	0.894923	0.009021	0	0.00122	0	0.49062	0	0	0	0	0.001633	0	0	0.007846
Fidarestat	0.294754	0.999996	0.897187	1	0.571067	0.987013	0.976688	0.008264	0.008403	0	0.4	0.401145	0.987013	0	0.531029
fk-453	1	0.998435	0.999441	1	0.968266	1	0.625587	0.997401	1	1	1	0.999202	1	1	0.999548
fk-633	0.267014	0.390817	0.000325	0	0.00122	0	0.354598	0	0	0	0	0.003654	0	0	0.090331
flacitran	0.012606	0.15303	6.1e-05	0	0.051587	0.013889	0.340771	0.020408	0.017143	0	0	0.0021	0.013889	0	0.004922
flavellagic acid	0.962412	0.010221	0.965485	1	0.997449	1	0.002845	0.997619	1	1	1	1	1	1	0.975966
flavone	0.005179	0.673735	8.9e-05	0	0.00122	0	0.461071	0	0	0	0	0.003654	0	0	0.002974
flavonol	0.999994	0.999995	1	1	0.893863	1	0.999382	0.998342	1	1	1	0.998348	1	1	0.999447
Flavopiridol	0.048472	0.796043	6.6e-05	0	0.2375	0	0.542984	0	0	0	0	0.003654	0	0	0.017397
floraquin	0.993168	0.937583	0.868511	1	1	1	0.548051	0.999286	1	1	0.8	0.899499	1	1	0.920393
Flufenamic Acid	0.001774	0.416482	2.2e-05	0	0.253264	0	0.453659	0	0	0	0	0.0013	0	0	0.001032
fluorosalan	1	0.999995	0.999975	1	1	1	0.712236	0.997163	1	1	1	0.999157	1	1	0.999711
fonsecinone a	0.010283	0	0	0	0.065797	0	0	0	0	0	0	0.001194	0	0	0.003826
Forodesine	0.996234	1	0.99993	1	0.972337	1	0.507839	1	1	1	1	0.998958	1	1	0.998374
Forskolin	0.974833	0.24082	0.999994	1	1	1	0.334449	0.999286	1	1	1	0.995928	1	1	0.990252
fpl-55712	0.001161	0.738037	7.5e-05	0	0.00122	0	0.459457	0	0	0	0	0.003654	0	0	0.00163
fr-113680	1	0.999955	0.99997	1	0.994012	0.998932	0.846432	0.998238	0.998932	1	1	0.999349	0.998932	1	0.999773
fr-175985	1	0.999984	0.998996	1	0.980805	1	0.738923	0.997619	1	1	1	0.999901	1	1	0.999632
fr-179254	0.987873	0.122962	0.999998	1	1	1	0.096751	0.999286	1	1	1	0.995176	1	1	0.994349
fr-180734	0.297301	0.093096	6.2e-05	0	0.051587	0.013889	0.185137	0.020408	0.017143	0	0.1	0.005577	0.013889	0	0.10098
fr-181157	1	0.939079	0.999847	1	0.999476	1	0.504894	0.999286	1	1	1	0.999033	1	1	0.999627
fr-182980	0.98272	1	0.999484	1	0.989434	1	0.373693	1	1	1	1	1	1	1	0.994068
fr-186054	0.297301	0.093096	6.2e-05	0	0.051587	0.013889	0.185137	0.020408	0.017143	0	0.1	0.005577	0.013889	0	0.10098
fr-226928	1	0.950324	0.999852	1	0.999476	1	0.561982	0.999286	1	1	1	0.999033	1	1	0.999628
fr-233118	1	0.950324	0.999852	1	0.999476	1	0.561982	0.999286	1	1	1	0.999033	1	1	0.999628
fr-235208	1	0.935713	0.999811	1	0.999476	1	0.498245	0.999286	1	1	1	0.997004	1	1	0.998938
fr-235656	1	0.935713	0.999811	1	0.999476	1	0.498245	0.999286	1	1	1	0.997004	1	1	0.998938
FR-79620	1	0.935713	0.999811	1	0.999476	1	0.498245	0.999286	1	1	1	0.997004	1	1	0.998938
fr-901277	0.053338	0.29437	8.2e-05	0	0.00122	0	0.26678	0	0	0	0	0.003654	0	0	0.019024
fti-276	0.024538	0.107853	7.4e-05	0	0.051587	0.013889	0.375641	0.020408	0.017143	0	0	0.0021	0.013889	0	0.008904
Fumagillin	0.867287	0.03422	0.997868	1	1	1	0.340882	0.999286	1	1	1	0.997541	1	1	0.954232
Fumarate	0.999209	0.679922	0.999997	1	1	1	0.512327	0.999286	1	1	1	0.995262	1	1	0.998156
fumitremorgin	0.397152	0.385991	0.00207	0	0	0	0.457823	0	0	0	0.2	0.105344	0	0	0.168189
fxr-450	0.035981	0.940078	0.000269	0	0.00122	0	0.577207	0	0	0	0	0.00115	0	0	0.012466
gallic acid	0.034601	0.453437	0.038172	0	0.492754	0	0.515073	0	0	0	0	0.110345	0	0	0.061039
gallocatechin gallate	0.245567	0.202936	0.99999	0	1	1	0.256062	0.999286	1	1	0.6	0.11076	1	1	0.452106
Gamma-Arsono-Beta, Gamma-Methyleneadenosine-5'-Diphosphate	0.010158	0.128625	0.000462	0	0.051587	0.013889	0.369121	0.020408	0.017143	0	0.1	0.009437	0.013889	0	0.006686
ganoderic acid b	0.997365	0.375522	0.998594	1	1	1	0.445619	0.999286	1	1	1	0.993723	1	1	0.996561
ganoderol b	0.997365	0.375522	0.998594	1	1	1	0.445619	0.999286	1	1	1	0.993723	1	1	0.996561
ganolucidic acid a	0.997365	0.375522	0.998594	1	1	1	0.445619	0.999286	1	1	1	0.993723	1	1	0.996561
ganstigmine	0.998421	0.496189	1	1	0.898819	1	0.569506	0.999265	1	1	1	0.998592	1	1	0.999004
gb-12819	0.0003	0.840435	0	0	0.003363	0.002132	0.197301	0.004392	0.002132	0	0	0.003543	0.002132	0	0.001281
gbr-12289	0.000204	0.724958	1e-06	0	0.022945	0	0.166177	0.001508	0	0	0	0.00245	0	0	0.000885
gdc-0879	0.999826	0.942174	0.996561	1	0.999476	1	0.578934	0.999286	1	1	1	0.999033	1	1	0.998473
Geldanamycin	0.533874	0.453468	0.003721	0	0.00122	0	0.381676	0	0	0	0	0.100804	0	0	0.2128
gemichalcone b	0.012883	0.894923	0.009021	0	0.00122	0	0.49062	0	0	0	0	0.001633	0	0	0.007846
gemopatrilat	0.106438	0	0	0	0.572581	1	0	0.998585	1	0	1	0.004888	1	0	0.037109
Genistein	0.007511	0.590048	6.2e-05	0	0.2375	0	0.489742	0	0	0	0	0.003654	0	0	0.003742
ginkgetin	0.921542	0.030615	0.997929	1	1	1	0.356023	0.999286	1	1	1	0.997541	1	1	0.972337
ginkgolide b	0.00773	0.189169	7.9e-05	0	0.00122	0	0.240756	0	0	0	0	0.003654	0	0	0.003821
glaucarubinone	0.014307	0.70389	0.000817	0	0.009801	0	0.635211	0	0	0	0	0.003293	0	0	0.006139
glycocitrine-i	0.99997	0.978039	0.999968	1	0.996064	1	0.703435	1	1	1	1	0.997794	1	1	0.999244
glycocitrine-iv	0.999235	0.438986	0.999995	1	1	1	0.468041	0.999286	1	1	1	0.995027	1	1	0.998086
glycyrrhizic acid	0.797264	0.265945	0.005084	1	0.001865	0	0.700263	0	0	0	0	0.698339	0	0	0.500229
gneyulin a	0.933033	0.028431	0.99795	1	1	1	0.365237	0.999286	1	1	1	0.997541	1	1	0.976174
gneyulin b	0.995028	1	0.999297	1	0.979206	1	0.553667	0.999284	1	1	1	1	1	1	0.998109
gnf-pf-1319	0.320202	0.904865	0.000492	0	0.00122	0	0.490976	0	0	0	0	0.103243	0	1	0.141313
gnf-pf-1401	1	0.999998	1	1	0.98103	1	0.996005	0.999264	1	1	1	0.999903	1	1	0.999968
gnf-pf-1458	0.99965	0.918857	0.996209	1	0.999476	1	0.512349	0.999286	1	1	1	0.997337	1	1	0.997732
gnf-pf-1550	1	0.959977	0.999976	1	0.966915	1	0.603607	1	1	1	1	0.998974	1	1	0.99965
gnf-pf-2094	0.000258	0.126312	0.00011	0	0.002994	0	0.203996	0	0	0	0	0.003654	0	0	0.001341
gnf-pf-2549	0.397152	0.385991	0.00207	0	0	0	0.457823	0	0	0	0.2	0.105344	0	0	0.168189
gnf-pf-2691	0.11457	0.999804	0.000434	0	0.033704	0	0.79768	0	0	0	0	0.00356	0	0	0.039521
gnf-pf-3189	0.000204	0.724958	1e-06	0	0.022945	0	0.166177	0.001508	0	0	0	0.00245	0	0	0.000885
gnf-pf-3207	0.956493	0.493559	0.999996	1	0.981132	1	0.402926	0.999286	1	1	1	0.993723	1	1	0.983404
gnf-pf-4337	0.776773	0.025956	0.997966	1	1	1	0.396082	0.999286	1	1	0.8	0.997541	1	1	0.924093
gnf-pf-4399	0.264192	0.742594	0.000229	0	0.001865	0	0.524313	0	0	0	0	0.000598	0	0	0.08834
gnf-pf-4440	0.201789	0.100888	0.001143	0	0	0	0.135976	0	0	0	0	0.002044	0	0	0.068325
gnf-pf-5069	0.976243	0.983175	0.98366	1	1	1	0.645515	0.999286	1	1	1	0.899476	1	1	0.953126
gnf-pf-607	5.3e-05	0	4.4e-05	0	0.104686	0	0	0	0	0	0	0.000312	0	0	0.000136
go-y026	6.8e-05	0.059509	5.8e-05	0	0.001686	0.001377	0.185702	0	0	0	0	0.001024	0.001377	0	0.000384
go-y034	0.397152	0.385991	0.00207	0	0	0	0.457823	0	0	0	0.2	0.105344	0	0	0.168189
gold sodium thiomalate	0.095178	0.703156	0.000202	0	0.001865	0	0.522483	0	0	0	0	0.000598	0	0	0.031992
gr-113808	1	0.986041	0.999965	1	0.991416	1	0.746993	0.999259	1	1	1	0.899546	1	1	0.966504
gr-159897	1	0.967514	0.999986	1	0.989182	1	0.663034	0.997823	1	1	1	0.999778	1	1	0.999921
gr-203040	1	0.999964	0.999574	1	0.990402	1	0.959188	1	1	1	1	0.999759	1	1	0.999778
gr-45809	1	0.977048	0.999973	1	0.966712	1	0.651949	1	1	1	1	0.998425	1	1	0.999466
grassystatin a	0.421936	0.299309	0.000324	0	0.4375	0.013889	0.421094	0.020408	0.017143	0	0	0.005344	0.013889	0	0.142535
grassystatin b	0.008754	0.144595	0.878972	0	0	0	0.446879	0	0	0	0	0.410345	0	0	0.43269
grl-8234	0.15783	0.052236	0.000377	0	0.051587	0.013889	0.276059	0.020408	0.017143	0	0	0.008943	0.013889	0	0.055717
gsk-269984a	0.000258	0.126312	0.00011	0	0.002994	0	0.203996	0	0	0	0	0.003654	0	0	0.001341
gsk-345931a	1	0.929264	0.999759	1	0.999476	1	0.483805	0.999286	1	1	1	0.997337	1	1	0.999032
gsk-369796	0.000432	0.226727	0.000107	0	0.00122	0	0.274311	0	0	0	0	0.003654	0	0	0.001398
gsk-554418a	0.00011	0.07258	0.000291	0	0.031501	0	0.217067	0	0	0	0	0.001471	0	0	0.000624
gsk-9772	0.627948	0.494687	0.188774	0	0.981132	1	0.466465	0.999286	1	1	1	0.190726	1	0	0.335816
GSK1070916	0.305886	0.854647	0.000119	0	0.00122	0	0.494554	0	0	0	0	0.003654	0	0	0.10322
GSK962040	7.4e-05	0.073124	0.000324	0	0.06043	0.001422	0.204652	0	0	0	0	0.001067	0.001422	0	0.000488
guttiferone a	0.465687	0.240961	0.419188	0	0.640064	0	0.469255	1	0	0	0	0.000936	0	1	0.29527
gw-0742	0.005726	0.102552	0.001566	0	0.002994	0	0.137391	0	0	0	0	0.003243	0	0	0.003512
gw-2580	0.999993	0.991132	0.999964	1	0.999476	1	0.717355	0.999286	1	1	1	0.999033	1	1	0.999663
GW-3333	0.70436	0.849747	0.002945	0	0.001865	0	0.584634	0	0	0	0	0.100598	0	0	0.269301
gw-3430	0.003153	0.350156	0.000105	0	0.00122	0	0.325862	0	0	0	0	0.003654	0	0	0.002304
gw-3965	0.627948	0.494687	0.188774	0	0.981132	1	0.466465	0.999286	1	1	1	0.190726	1	0	0.335816
gw-4459	0.70436	0.849747	0.002945	0	0.001865	0	0.584634	0	0	0	0	0.100598	0	0	0.269301
gw-637185x	0.11457	0.999804	0.000434	0	0.033704	0	0.79768	0	0	0	0	0.00356	0	0	0.039521
gw-813893	0.20471	0.422929	0.000173	0	0.002245	0	0.196321	0	0	0	0	0.000347	0	0	0.06841
gw-848687x	2.8e-05	0.010149	0	0	0.034919	0	0.054115	0	0	0	0	0.000946	0	0	0.000325
gw-9578	0.007804	0.083479	2.1e-05	0	0.03229	0	0.14452	0	0	0	0	0.000352	0	0	0.002726
gw-9662	0.005726	0.102552	0.001566	0	0.002994	0	0.137391	0	0	0	0	0.003243	0	0	0.003512
h-tyr-asn-trp-asn-ser-phe-gly-leu-arg-phe-nh2	1	0.963131	0.999882	1	0.999476	1	0.626682	0.999286	1	1	1	0.999033	1	1	0.999638
Hadacidin	0.996338	1	0.999484	1	0.989434	1	0.379816	1	1	1	1	1	1	1	0.998607
hapalosin	0.931898	0.965217	0.522219	1	0.730026	1	0.759632	1	1	1	0.9	0.201263	1	0	0.551793
hc-3	1	0.96438	0.999914	1	0.999476	1	0.626339	0.999286	1	1	1	0.999033	1	1	0.999649
heptyl-carbamic acid 1,3a,8-trimethyl-1,2,3,3a,8,8a-hexahydro-pyrrolo[2,3-b]indol-5-yl ester (eptastigmine)	0.998421	0.496189	1	1	0.898819	1	0.569506	0.999265	1	1	1	0.998592	1	1	0.999004
hexobendine	0.203399	0.932357	0.031139	0	0.103909	0	0.719048	0	0	0	0	0.003226	0	0	0.079254
hmr-1883	0.598307	0.261277	0.246011	0	1	1	0.380965	0.999286	1	1	0.6	0.01076	1	0	0.285026
hql-79	0.815865	0.217406	0.999924	1	1	1	0.334896	0.999286	1	1	0.9	0.802334	1	1	0.872708
hts-00213	0.999987	0.999876	0.999962	1	0.999476	1	0.736882	0.999254	1	1	1	0.999543	1	1	0.999831
hts-05065	0.99965	0.960492	0.974019	1	0.999476	1	0.636499	0.999286	1	1	1	0.999033	1	1	0.990901
hts-466284	0.996745	0.904706	0.955752	1	1	1	0.480847	0.999286	1	1	1	0.77824	1	1	0.910245
Huperaine A	0.997365	0.375522	0.998594	1	1	1	0.445619	0.999286	1	1	1	0.993723	1	1	0.996561
hydrazinonicotinyl analogue	0.267014	0.390817	0.000325	0	0.00122	0	0.354598	0	0	0	0	0.003654	0	0	0.090331
hydroxylated derivative (metabolite 1)	0.11457	0.999804	0.000434	0	0.033704	0	0.79768	0	0	0	0	0.00356	0	0	0.039521
hypericin	0.003178	0.212209	0.012831	0	0.002994	0	0.249112	0	0	0	0	0.003654	0	0	0.006554
i7-(4-dimethylamino-phenyl)-6-methyl-7-oxo-hepta-2,4-dienoic acid hydroxyamide(trichostatin a)	0.346352	0.306618	0.082194	0	0.488701	0	0.318471	0	0.017143	0	0	0.403443	0	0	0.27733
Ibudilast	0.145502	0.075649	0.017503	0	0.017182	0	0.013901	0	0	0	0.1	0.499914	0	0	0.220973
ici-118551	0.918728	0.961494	0.07046	1	0.5	0	0.619818	0.999286	0	0	0.4	0.499942	0	1	0.496377
ici-174864	1	0.971166	0.999867	1	0.999476	1	0.669182	0.999286	1	1	1	0.999033	1	1	0.999633
ici-198615	1	0.967374	0.999779	1	0.999476	1	0.653583	0.999286	1	1	1	0.999033	1	1	0.999604
ici-204448	1	0.971093	0.999873	1	0.999476	1	0.669618	0.999286	1	1	1	0.999033	1	1	0.999635
Iclaprim	0.991799	1	1	1	0.972677	0.995074	0.194858	0.999284	0.995074	1	1	1	0.995074	1	0.997266
idebenone	0.000106	0.075987	2.1e-05	0	0.03229	0	0.213943	0	0	0	0	0.0013	0	0	0.000475
idoxifene	0.372894	0.36447	0.11445	0	0.481132	0	0.382047	0	0	0	0	0.38618	0	0	0.291175
ile-pro-ile	0.995526	0.557523	1	1	0.75	1	0.776382	0.998502	1	1	1	0.998289	1	1	0.997938
im-094261	1	0.999998	1	1	1	1	0.873722	0.9993	1	1	1	0.999706	1	1	0.999902
imidapril	0.106438	0	0	0	0.572581	1	0	0.998585	1	0	1	0.004888	1	0	0.037109
imidaprilat	0.106438	0	0	0	0.572581	1	0	0.998585	1	0	1	0.004888	1	0	0.037109
imirestat	0.905185	0.026104	0.997963	1	1	1	0.380321	0.999286	1	1	1	0.997541	1	1	0.966896
immunomycin	0.71781	0.372714	0.997936	0	0.981132	1	0.363091	0.999286	0	1	1	0.28618	1	1	0.667309
in-1130	0.864803	0.805998	0.06257	1	0.03229	0	0.454861	0	0	0	0	0.30082	0	0	0.409398
in-1166	0.999997	0.945672	0.998794	1	0.999476	1	0.546305	0.999286	1	1	1	0.999033	1	1	0.999274
incadronic acid	0.996275	1	0.999894	1	0.988234	1	0.368478	0.996329	1	1	1	0.999552	1	1	0.998573
incb-3344	1	0.999996	0.999988	1	0.980805	1	0.881169	0.997619	1	1	1	0.999901	1	1	0.999963
indalpine	0.987061	0.081311	0.969615	1	1	1	0.136223	0.999286	1	1	1	0.996794	1	1	0.98449
indirubin	0.073075	0.559052	0.000164	0	0.001865	0	0.577865	0	0	0	0	0.000598	0	0	0.024612
indolidan	0.882959	0.204802	0.997649	1	1	1	0.342552	0.999286	1	1	1	0.608268	1	1	0.829625
indolocarbazole analogue	0.999959	0.994156	0.999986	1	0.999476	1	0.749504	0.999286	1	1	1	0.999033	1	1	0.999659
inogatran	0.999935	0.99999	0.999539	1	0.97412	1	0.974446	0.999238	1	1	1	0.997747	1	1	0.999074
ipidacrine	0.997365	0.375522	0.998594	1	1	1	0.445619	0.999286	1	1	1	0.993723	1	1	0.996561
ipriflavone	0.064031	0.258188	0.269388	0	0.002994	0	0.298047	0	0	0	0	0.008587	0	0	0.114002
ipsapirone	1	0.971339	0.999907	1	0.999476	1	0.647314	0.999286	1	1	1	0.999033	1	1	0.999647
ircinialactam a	0.008155	0.097849	0.000224	0	0	0	0.155097	0	0	0	0	0.003243	0	0	0.003874
Isatin	0.927462	0.143859	0.999998	1	1	1	0.169548	0.999286	1	1	1	0.897851	1	1	0.941771
isoclozapine	1	0.981647	0.999928	1	0.999476	1	0.678614	0.999286	1	1	1	0.999033	1	1	0.999654
isogemichalcone b	1	0.999999	1	1	0.999423	1	1	0.997706	1	1	1	0.999818	1	1	0.999939
isoliquiritigenin	0.905185	0.026104	0.997963	1	1	1	0.380321	0.999286	1	1	1	0.997541	1	1	0.966896
isolongifolol	0.862712	0.025726	0.997965	1	1	1	0.389421	0.999286	1	1	0.9	0.997541	1	1	0.95274
isoquercitrin	0.760688	0.037937	0.997054	1	1	1	0.243349	0.999286	1	1	1	0.997541	1	1	0.918428
j-113,397	1	0.969827	0.999875	1	0.999476	1	0.662266	0.999286	1	1	1	0.999033	1	1	0.999636
jnj-17148066	0.59934	0.956461	0.048212	0	0.009202	0	0.815842	0	0	0	0	0.00679	0	0	0.218114
jnj-17203212	0.086252	0.92658	5.2e-05	0	0.145783	0	0.724697	0.013699	0	0	0	0.002038	0	0	0.029447
jnj-26529152	0.59934	0.956461	0.048212	0	0.009202	0	0.815842	0	0	0	0	0.00679	0	0	0.218114
jnj-26990990	0.968145	0.565056	0.999236	1	0.998542	1	0.179017	1	1	1	1	0.997535	1	1	0.988305
jnj-27390467	0.99934	0.578637	0.999998	1	1	1	0.478001	0.999286	1	1	1	0.995027	1	1	0.998122
jnj-28318706	1	0.937955	0.999861	1	0.999476	1	0.512073	0.999286	1	1	1	0.999033	1	1	0.999631
jnj-38158471	0.999993	0.992091	0.999967	1	0.999476	1	0.74039	0.999286	1	1	1	0.999033	1	1	0.999664
jnj-7777120	1	0.975465	0.999391	1	0.999476	1	0.702543	0.999286	1	1	1	0.999033	1	1	0.999475
jtc-801	1	0.969827	0.999875	1	0.999476	1	0.662266	0.999286	1	1	1	0.999033	1	1	0.999636
jtt-305	0.02607	0.493412	8.2e-05	0	0.00122	0	0.426206	0	0	0	0	0.003654	0	0	0.009935
kaempferide	0.000258	0.126312	0.00011	0	0.002994	0	0.203996	0	0	0	0	0.003654	0	0	0.001341
kainate	1	0.96438	0.999914	1	0.999476	1	0.626339	0.999286	1	1	1	0.999033	1	1	0.999649
kkht-10109	0.006345	0.696685	1.4e-05	0	0.019664	0	0.190509	0.001236	0	0	0	0.014345	0	0	0.006902
kkht-10318	0.053068	0.65609	6.7e-05	0	0.00122	0	0.422491	0	0	0	0	0.003654	0	0	0.018929
kkht-10609	0.053068	0.65609	6.7e-05	0	0.00122	0	0.422491	0	0	0	0	0.003654	0	0	0.018929
kkht-10612	0.006345	0.696685	1.4e-05	0	0.019664	0	0.190509	0.001236	0	0	0	0.014345	0	0	0.006902
kkht-10613	0.006345	0.696685	1.4e-05	0	0.019664	0	0.190509	0.001236	0	0	0	0.014345	0	0	0.006902
kkht-10615	0.006748	0.068888	0.000166	0	0.022727	0	0.124317	0.001335	0	0	0	0.001235	0	0	0.002716
kkht-11118	0.005178	0.778615	3.3e-05	0	0.058252	0	0.046533	0	0	0	0	0.001293	0	0	0.002168
kkht-20713	0.006345	0.696685	1.4e-05	0	0.019664	0	0.190509	0.001236	0	0	0	0.014345	0	0	0.006902
kkht-20718	0.053068	0.65609	6.7e-05	0	0.00122	0	0.422491	0	0	0	0	0.003654	0	0	0.018929
ko-143	0.397152	0.385991	0.00207	0	0	0	0.457823	0	0	0	0.2	0.105344	0	0	0.168189
krm-195	0.991312	0.887742	0.895233	1	1	1	0.470374	0.999286	1	0	0.3	0.499561	1	1	0.795369
krn-951	0.998955	0.995506	1	1	0.992241	1	0.79313	1	1	1	1	0.999441	1	1	0.999465
KRN633	0.999969	0.993886	0.999985	1	0.999476	1	0.753253	0.999286	1	1	1	0.999033	1	1	0.999662
krp-297	0.005254	0.010346	4e-05	0	0.002955	0	0.005383	0	0	0	0	0.00077	0	0	0.002021
kt-5720	0.680447	0.04891	0.997011	1	1	1	0.30899	0.999286	1	1	1	0.997541	1	1	0.891666
KU-0059436	0.997638	0.564107	0.996966	1	0.981132	1	0.491992	0.999286	1	1	1	0.974942	1	1	0.989848
kuromanin	0.201789	0.100888	0.001143	0	0	0	0.135976	0	0	0	0	0.002044	0	0	0.068325
kushenol a	0.921542	0.030615	0.997929	1	1	1	0.356023	0.999286	1	1	1	0.997541	1	1	0.972337
kuwanon j	0.345266	0.500198	0.001558	0	0.00122	0	0.419822	0	0	0	0	0.0021	0	0	0.116308
kuwanon r	0.002201	0.146379	3.2e-05	0	0.03229	0	0.479849	0	0	0	0	0.0013	0	0	0.001178
kuwanon v	0.002201	0.146379	3.2e-05	0	0.03229	0	0.479849	0	0	0	0	0.0013	0	0	0.001178
KW-6002	0.000113	0.073284	7e-05	0	0.001446	0	0.203129	0	0	0	0	0.000884	0	0	0.000356
kys-05040	0.998484	0.999892	0.999996	1	0.806532	1	0.808037	0.999273	1	1	1	0.999569	1	1	0.99935
kys-05050	0.998484	0.999892	0.999996	1	0.806532	1	0.808037	0.999273	1	1	1	0.999569	1	1	0.99935
kys-05056	0.999999	1	1	1	0.848164	1	0.999998	0.999153	1	1	1	0.9998	1	1	0.999933
kys-05057	0.998484	0.999892	0.999996	1	0.806532	1	0.808037	0.999273	1	1	1	0.999569	1	1	0.99935
kys-05064	0.999999	1	1	1	0.848164	1	0.999998	0.999153	1	1	1	0.9998	1	1	0.999933
kys-05080	0.999999	1	1	1	0.848164	1	0.999998	0.999153	1	1	1	0.9998	1	1	0.999933
l-136662	0.865873	0.808813	0.999995	1	0.811163	0.933333	0.368537	0.996587	1	0	0.6	0.499423	0.933333	1	0.78843
l-158338	1	0.999769	0.999963	1	0.984826	1	0.717874	0.998403	1	1	1	0.999438	1	1	0.9998
l-158827	1	0.999769	0.999963	1	0.984826	1	0.717874	0.998403	1	1	1	0.999438	1	1	0.9998
l-158854	1	0.999831	0.999965	1	0.987073	1	0.740262	0.998439	1	1	1	0.999475	1	1	0.999813
l-159686	1	0.999998	0.999723	1	0.938197	1	1	1	1	1	1	0.999901	1	1	0.999875
l-159894	1	0.999769	0.999963	1	0.984826	1	0.717874	0.998403	1	1	1	0.999438	1	1	0.9998
l-159913	1	0.999831	0.999965	1	0.987073	1	0.740262	0.998439	1	1	1	0.999475	1	1	0.999813
l-161177	1	0.999831	0.999965	1	0.987073	1	0.740262	0.998439	1	1	1	0.999475	1	1	0.999813
l-161570	1	0.989759	0.999381	1	0.98523	1	0.712621	0.997238	1	1	1	0.999151	1	1	0.999511
l-161719	1	0.999831	0.999965	1	0.987073	1	0.740262	0.998439	1	1	1	0.999475	1	1	0.999813
l-161816	1	0.999831	0.999965	1	0.987073	1	0.740262	0.998439	1	1	1	0.999475	1	1	0.999813
l-162132	1	0.999769	0.999963	1	0.984826	1	0.717874	0.998403	1	1	1	0.999438	1	1	0.9998
l-162389	1	0.999769	0.999963	1	0.984826	1	0.717874	0.998403	1	1	1	0.999438	1	1	0.9998
l-162782	1	0.999998	0.999723	1	0.938197	1	1	1	1	1	1	0.999901	1	1	0.999875
l-163491	1	0.999769	0.999963	1	0.984826	1	0.717874	0.998403	1	1	1	0.999438	1	1	0.9998
l-249313	1	0.998435	0.999441	1	0.968266	1	0.625587	0.997401	1	1	1	0.999202	1	1	0.999548
l-365260	0.682263	0.94483	0.065135	1	0.5	0	0.603262	0.999286	0	0	0.1	0.501996	0	0	0.416465
l-657925	1	0.999932	0.994779	1	0.52764	0	0.097112	1	0	0	0.8	0.500205	0	1	0.831661
l-674636	0.23649	0	7e-06	0	0.036665	0	0	0	0	1	0.2	0.001498	0	0	0.079332
l-680573	1	0.941102	0.999972	1	0.976792	1	0.623851	0.997729	1	1	1	0.999137	1	1	0.999703
l-685458	0.921542	0.030615	0.997929	1	1	1	0.356023	0.999286	1	1	1	0.997541	1	1	0.972337
l-689037	1	0.999999	1	1	0.999423	1	1	0.997706	1	1	1	0.999818	1	1	0.999939
l-691121	0.976243	0.983175	0.98366	1	1	1	0.645515	0.999286	1	1	1	0.899476	1	1	0.953126
l-694458	0.053338	0.29437	8.2e-05	0	0.00122	0	0.26678	0	0	0	0	0.003654	0	0	0.019024
l-702-539	0.816674	0.370359	0.099328	1	0.763221	1	0.037649	0.999244	1	0	0.1	1	1	0	0.638667
l-703014	0.267014	0.390817	0.000325	0	0.00122	0	0.354598	0	0	0	0	0.003654	0	0	0.090331
l-703766	1	0.999964	0.999574	1	0.990402	1	0.959188	1	1	1	1	0.999759	1	1	0.999778
l-705084	1	0.999964	0.999574	1	0.990402	1	0.959188	1	1	1	1	0.999759	1	1	0.999778
l-706125	1	0.999964	0.999574	1	0.990402	1	0.959188	1	1	1	1	0.999759	1	1	0.999778
l-708474	1	0.951085	0.999844	1	0.999476	1	0.564821	0.999286	1	1	1	0.999033	1	1	0.999626
l-70858	0.069043	0.161935	0.626974	0	1	1	0.25763	0.999286	1	1	0.4	0.111314	1	0	0.269111
l-708734	1	0.999673	0.999911	1	0.937133	0.999036	0.995933	1	0.999036	1	1	0.999808	0.999036	1	0.999906
l-709400	1	0.999964	0.999574	1	0.990402	1	0.959188	1	1	1	1	0.999759	1	1	0.999778
l-731735	0.024538	0.107853	7.4e-05	0	0.051587	0.013889	0.375641	0.020408	0.017143	0	0	0.0021	0.013889	0	0.008904
l-734217	0.267014	0.390817	0.000325	0	0.00122	0	0.354598	0	0	0	0	0.003654	0	0	0.090331
l-738167	0.267014	0.390817	0.000325	0	0.00122	0	0.354598	0	0	0	0	0.003654	0	0	0.090331
l-741604	1	0.957648	0.999867	1	0.999476	1	0.595957	0.999286	1	1	1	0.999033	1	1	0.999633
l-741626	1	0.950678	0.999719	1	0.966712	1	0.5055	1	1	1	1	0.999213	1	1	0.999644
l-741671	1	0.999964	0.999574	1	0.990402	1	0.959188	1	1	1	1	0.999759	1	1	0.999778
l-74372	1	0.965553	0.999998	1	0.978158	1	0.600777	1	1	1	1	0.99935	1	1	0.999783
l-744832	0.084932	0.787691	0.114272	0	0.079155	0	0.524742	0.001529	0	0	0	0.018162	0	0	0.072455
l-746530	0.816674	0.370359	0.099328	1	0.763221	1	0.037649	0.999244	1	0	0.1	1	1	0	0.638667
l-747201	1	0.976005	0.99967	1	0.986513	1	0.593242	1	1	1	1	0.999231	1	1	0.999634
l-754142	1	0.992668	0.998169	1	0.982235	1	0.54988	1	1	1	1	1	1	1	0.99939
l-755507	1	0.965553	0.999998	1	0.978158	1	0.600777	1	1	1	1	0.99935	1	1	0.999783
l-757793	1	0.996144	0.999509	1	0.948867	1	0.621256	0.997155	1	1	1	0.99981	1	1	0.999773
l-760790	1	0.958779	0.999873	1	0.999476	1	0.602666	0.999286	1	1	1	0.999033	1	1	0.999635
l-768673	0.029041	0.940475	0.000112	0	0.00122	0	0.630592	0	0	0	0	0.001616	0	0	0.010256
l-775606	1	0.95744	0.999872	1	0.999476	1	0.594991	0.999286	1	1	1	0.999033	1	1	0.999635
l-783279	0.999751	0.986456	0.999959	1	0.985341	1	0.71112	0.999283	1	1	1	0.999876	1	1	0.999862
l-796568	1	0.940036	0.999954	1	0.973784	1	0.571789	0.999272	1	1	1	0.999065	1	1	0.999673
l-870810	0.469424	0.096861	0.991097	1	1	1	0.425491	0.999286	1	1	1	0.301155	1	0	0.587225
L-NAME	0.67884	0.308148	0.999992	1	1	1	0.346569	0.999286	1	1	1	0.191063	1	1	0.623298
largazole	0.916556	0.340591	0.999461	0	0.002994	0	0.274144	0.999286	0	0	0.3	0.103187	0	1	0.673068
lariciresinol	7.4e-05	0.073124	0.000324	0	0.06043	0.001422	0.204652	0	0	0	0	0.001067	0.001422	0	0.000488
LAS-34273	1	0.999992	0.999639	1	0.99266	1	0.696361	0.998578	1	1	1	0.99981	1	1	0.999817
las101057	0.000259	0.519181	6.3e-05	0	0.00122	0	0.392357	0	0	0	0	0.003654	0	0	0.001325
latifolian a	0.998372	0.908707	0.9851	1	0.999476	1	0.495373	0.999286	1	1	1	0.898481	1	1	0.960651
latifolian b	0.998372	0.908707	0.9851	1	0.999476	1	0.495373	0.999286	1	1	1	0.898481	1	1	0.960651
lavendustin a	1	0.983755	0.999892	1	0.999476	1	0.697952	0.999286	1	1	1	0.999033	1	1	0.999642
lavendustin b	0.999987	0.999876	0.999962	1	0.999476	1	0.736882	0.999254	1	1	1	0.999543	1	1	0.999831
leachianone a	0.921542	0.030615	0.997929	1	1	1	0.356023	0.999286	1	1	1	0.997541	1	1	0.972337
lenoleic acid	0.008309	0.075199	0.996685	0	0.026944	0.013889	0.419003	0.020408	0.017143	0	0	0.505345	0.013889	0	0.503446
lentaron	6.1e-05	0.895699	1e-06	0	0.002283	0	0.214624	0.001321	0	0	0	0.001005	0	0	0.000355
Lestaurtinib	1	0.986649	0.999927	1	0.999476	1	0.673907	0.999286	1	1	1	0.999033	1	1	0.999653
lethelmin	0.151655	0.363244	0.002748	0	0.00122	0	0.354522	0	0	0	0	0.003654	0	0	0.052685
leucanthin b	0.11457	0.999804	0.000434	0	0.033704	0	0.79768	0	0	0	0	0.00356	0	0	0.039521
leucettamine a	1	0.999973	0.999521	1	0.90677	1	0.771498	1	1	1	1	0.999547	1	1	0.999689
leucettamol a	0.176853	0.090423	0.000521	0	0	0	0.15277	0.999286	0.017143	0	0	0.102777	0	0	0.093384
leucosceptoside a	0.999996	0.991752	0.99999	1	0.966712	1	0.743949	1	1	1	1	0.998577	1	1	0.999521
leukotriene d4	1	0.999673	0.999911	1	0.937133	0.999036	0.995933	1	0.999036	1	1	0.999808	0.999036	1	0.999906
leupeptin	0.990201	0.496299	0.991682	1	0	0	0.50514	0.999286	0.017143	1	0.7	0.995262	0	1	0.992381
levormeloxifene	0.595629	0.999704	2.7e-05	0	0.292776	0	0.547864	0.002571	0	0	0	0.008958	0	0	0.201538
lfm-a13	1	0.972385	0.999889	1	0.999476	1	0.644893	0.999286	1	1	1	0.999033	1	1	0.999641
liazal	0.000258	0.126312	0.00011	0	0.002994	0	0.203996	0	0	0	0	0.003654	0	0	0.001341
libenzapril	0.995041	1	0.996845	1	0.970576	1	0.400047	0.999287	1	1	1	0.998554	1	1	0.996813
licoagrochalcone a	0.345266	0.500198	0.001558	0	0.00122	0	0.419822	0	0	0	0	0.0021	0	0	0.116308
Licofelone	0.009162	0.16686	6.9e-05	0	0.506944	0.013889	0.283711	0.020408	0.017143	0	0.1	0.001633	0.013889	0	0.003622
lidorestat	0.294754	0.999996	0.897187	1	0.571067	0.987013	0.976688	0.008264	0.008403	0	0.4	0.401145	0.987013	0	0.531029
lipidyl pseudopterane a	0.002201	0.146379	3.2e-05	0	0.03229	0	0.479849	0	0	0	0	0.0013	0	0	0.001178
Lixivaptan	1	0.959713	0.999827	1	0.966712	1	0.543665	1	1	1	1	0.999213	1	1	0.99968
lm-4108	0.01883	0.843215	0.001955	0	0.075787	0	0.733055	0	0	0	0	0.001399	0	0	0.007395
lomerizine	0.999748	0.999985	0.99997	1	0.99947	1	0.821312	1	1	1	1	0.999683	1	1	0.9998
lorglumide	1	0.999966	0.998617	1	0.978485	1	0.627662	0.998573	1	1	1	0.999326	1	1	0.999314
lorneic acid a	0.020464	0	4.7e-05	0	0.05227	0	0	0	0	0	0	0.000127	0	0	0.006879
lotrafiban	0.267014	0.390817	0.000325	0	0.00122	0	0.354598	0	0	0	0	0.003654	0	0	0.090331
loxoprofen	1	0.999999	1	1	0.999423	1	1	0.997706	1	1	1	0.999818	1	1	0.999939
loxoprofen sodium	1	0.999999	1	1	0.999423	1	1	0.997706	1	1	1	0.999818	1	1	0.999939
lu-135252	1	0.992668	0.998169	1	0.982235	1	0.54988	1	1	1	1	1	1	1	0.99939
lucidenic acid a	0.997365	0.375522	0.998594	1	1	1	0.445619	0.999286	1	1	1	0.993723	1	1	0.996561
luotonin a	1	0.999862	1	1	1	1	0.902595	0.998706	1	1	1	0.999438	1	1	0.999813
luteolinidin	0.201789	0.100888	0.001143	0	0	0	0.135976	0	0	0	0	0.002044	0	0	0.068325
ly-117018	0.59934	0.956461	0.048212	0	0.009202	0	0.815842	0	0	0	0	0.00679	0	0	0.218114
ly-171833	0.816674	0.370359	0.099328	1	0.763221	1	0.037649	0.999244	1	0	0.1	1	1	0	0.638667
ly-186126	0.145502	0.075649	0.017503	0	0.017182	0	0.013901	0	0	0	0.1	0.499914	0	0	0.220973
ly-197055	0.882959	0.204802	0.997649	1	1	1	0.342552	0.999286	1	1	1	0.608268	1	1	0.829625
ly-213024	1	0.999973	0.999521	1	0.90677	1	0.771498	1	1	1	1	0.999547	1	1	0.999689
ly-2183240	0.438147	0.999636	0.999488	1	0.723459	1	0.653444	1	1	1	1	0.80281	1	1	0.746815
ly-233053	0.715466	0.461083	0.110001	1	0.00122	0	0.396156	0	0	0	0.3	0.100466	0	0	0.308644
ly-2365109	0.597758	0.247972	0.025871	0	0	0	0.013579	0	0.047619	0	0	0.097404	0	0	0.240344
ly-292223	0.094777	0.163315	0.966965	0	0.006944	0.013889	0.271487	0.020408	0.017143	0	0	0.669931	0.013889	1	0.577224
ly-292728	1	0.999624	0.998109	1	1	1	0.561582	0.999243	1	1	1	0.999448	1	1	0.999186
ly-293558	0.068706	0.110315	2.3e-05	0	0.03229	0	0.37177	0	0	0	0	0.0013	0	0	0.023343
ly-326449	1	0.976754	0.999881	1	0.999476	1	0.676887	0.999286	1	1	1	0.999033	1	1	0.999638
ly-341495	0.030746	0.635835	0.016283	0	0.00122	0	0.480515	0	0	0	0	0.025466	0	0	0.024165
ly-97241	0.123247	0.972171	0.255899	0	0.561491	0	0.690361	0	0	0	0.1	0.399213	0	0	0.259453
M-Cresol	0.997479	0.513153	0.999847	1	0.993189	1	0.606079	1	1	1	1	0.997794	1	1	0.998373
mahureone a	0.553765	0.060131	0.993962	1	1	1	0.286314	0.999286	1	1	1	1	1	1	0.849242
malvidin	0.201789	0.100888	0.001143	0	0	0	0.135976	0	0	0	0	0.002044	0	0	0.068325
mangostin	0.006031	0.135477	9.6e-05	0	0.085892	0.013889	0.261339	0.020408	0.017143	0	0	0.003654	0.013889	0	0.00326
mannostatin a	0.983717	1	0.999484	1	0.98457	1	0.566486	1	1	1	1	0.995	1	1	0.992734
manzamine	0.824762	0.804833	0.075613	1	0.03229	0	0.46075	0	0	0	0	0.30082	0	0	0.400398
manzamine a	0.991291	0.88855	0.889802	1	1	1	0.470909	0.999286	1	0	0.3	0.200711	1	1	0.693934
maslinic acid	0.008596	0.123704	6.1e-05	0	0.051587	0.013889	0.342396	0.020408	0.017143	0	0	0.003654	0.013889	0	0.004104
mcl-129	1	0.964721	0.999898	1	0.999476	1	0.625516	0.999286	1	1	1	0.999033	1	1	0.999644
mcl-144	1	0.980455	0.999968	1	0.982527	1	0.65501	0.999275	1	1	1	0.998738	1	1	0.999569
mcl-183	1	0.999997	0.999977	1	0.993962	1	0.999912	0.997571	1	1	1	0.999711	1	1	0.999896
mcl-428	1	0.999997	0.999977	1	0.993962	1	0.999912	0.997571	1	1	1	0.999711	1	1	0.999896
mcl-429	1	0.980455	0.999968	1	0.982527	1	0.65501	0.999275	1	1	1	0.998738	1	1	0.999569
mcl-443	1	0.999997	0.999977	1	0.993962	1	0.999912	0.997571	1	1	1	0.999711	1	1	0.999896
mcl-444	1	0.999997	0.999977	1	0.993962	1	0.999912	0.997571	1	1	1	0.999711	1	1	0.999896
mcl-449	1	0.999997	0.999977	1	0.993962	1	0.999912	0.997571	1	1	1	0.999711	1	1	0.999896
mcl-451	1	0.971166	0.999867	1	0.999476	1	0.669182	0.999286	1	1	1	0.999033	1	1	0.999633
mdl-19205	0.906068	0.227646	0.998356	1	1	1	0.364027	0.999286	1	1	1	0.996452	1	1	0.966959
mdl-28050	0.037105	0.999924	0.005097	0	0.110053	0.008746	0.888787	0.011905	0.008746	0	0	0.006046	0.008746	0	0.016083
mdl-72222	0.017491	0.437369	6.3e-05	0	0.00122	0	0.353246	0	0	0	0	0.003654	0	0	0.007069
melampodin a	0.11457	0.999804	0.000434	0	0.033704	0	0.79768	0	0	0	0	0.00356	0	0	0.039521
men-10627	1	0.999955	0.99997	1	0.994012	0.998932	0.846432	0.998238	0.998932	1	1	0.999349	0.998932	1	0.999773
meribendan	0.906068	0.227646	0.998356	1	1	1	0.364027	0.999286	1	1	1	0.996452	1	1	0.966959
meridianin a	0.04695	0.806201	7e-05	0	0.00122	0	0.515411	0	0	0	0	0.003654	0	0	0.016891
meridianin b	0.325753	0.869257	0.000247	0	0.00122	0	0.491784	0	0	0	0	0.003654	0	0	0.109885
meriolin 4	0.00791	0.658501	9.9e-05	0	0.00122	0	0.490014	0	0	0	0	0.0021	0	0	0.00337
metacetamol	7.9e-05	0.826487	1e-06	0	0.001935	0	0.251816	0	0	0	0	0.001219	0	0	0.000433
metergoline	0.006215	0.745436	7.2e-05	0	0.00122	0	0.466788	0	0	0	0	0.003654	0	0	0.003313
methyl-carbamic acid 1,3a,8-trimethyl-1,2,3,3a,8,8a-hexahydro-pyrrolo[2,3-b]indol-5-yl ester	0.998421	0.496189	1	1	0.898819	1	0.569506	0.999265	1	1	1	0.998592	1	1	0.999004
methyl-carbamic acid 2,4a,9-trimethyl-2,3,4,4a,9,9a-hexahydro-1-oxa-2,9-diaza-fluoren-6-yl ester	0.998421	0.496189	1	1	0.898819	1	0.569506	0.999265	1	1	1	0.998592	1	1	0.999004
methylene blue	0.699166	0.16835	0.999998	1	1	1	0.227354	0.999286	1	1	0.9	0.897851	1	1	0.865672
Methyltrienolone	0.999999	0.999997	1	1	0.883626	1	0.999733	0.999178	1	1	1	0.999812	1	1	0.999937
metitepine	1	0.960271	0.999899	1	0.999476	1	0.609232	0.999286	1	1	1	0.999033	1	1	0.999644
Mevastatin	0.971796	0.715312	0.999985	1	0.961155	1	0.127673	0.998035	1	1	1	0.999533	1	1	0.990438
mf-152	0.201789	0.100888	0.001143	0	0	0	0.135976	0	0	0	0	0.002044	0	0	0.068325
micropeptin 103	0.037105	0.999924	0.005097	0	0.110053	0.008746	0.888787	0.011905	0.008746	0	0	0.006046	0.008746	0	0.016083
Midostaurin	1	0.986649	0.999927	1	0.999476	1	0.673907	0.999286	1	1	1	0.999033	1	1	0.999653
mifurol	0.000556	0.427408	6.5e-05	0	0.00122	0	0.348651	0	0	0	0	0.003654	0	0	0.001425
Miltefosine	0.995409	0.392113	0.999998	1	1	1	0.311985	0.999286	1	1	1	0.995027	1	1	0.996812
minalrestat	0.758075	1	2.9e-05	1	0.883091	1	0.633739	1	1	1	1	0.9	1	1	0.552701
miraziridine a	0.999235	0.438986	0.999995	1	1	1	0.468041	0.999286	1	1	1	0.995027	1	1	0.998086
mk-0354	1	0.998398	0.999894	1	0.978297	1	0.682702	0.999285	1	1	1	0.999804	1	1	0.999899
mk-0731	0.976243	0.983175	0.98366	1	1	1	0.645515	0.999286	1	1	1	0.899476	1	1	0.953126
MK-0822	0.999235	0.438986	0.999995	1	1	1	0.468041	0.999286	1	1	1	0.995027	1	1	0.998086
mk-1256	0.999957	0.876216	0.999814	1	0.931818	1	0.547572	0.997706	1	1	1	0.994444	1	1	0.998072
mk-24	0.000258	0.126312	0.00011	0	0.002994	0	0.203996	0	0	0	0	0.003654	0	0	0.001341
MK-3281	0.999257	0.982467	0.999913	1	0.925015	1	0.687393	0.999177	1	1	1	0.99448	1	1	0.997884
mk-417	0.96533	0.694746	0.99935	1	0.930826	1	0.161165	1	1	1	1	0.999573	1	1	0.988084
mk-4305	1	0.959858	0.999878	1	0.999476	1	0.609182	0.999286	1	1	1	0.999033	1	1	0.999637
MK-4827	0.874374	0.636012	0.994082	1	0.981132	1	0.497837	0.999286	1	1	1	0.522561	1	0	0.797006
mk-499	0.976243	0.983175	0.98366	1	1	1	0.645515	0.999286	1	1	1	0.899476	1	1	0.953126
mkt-077	0.934978	0.269131	0.999998	1	0.502994	1	0.183161	0.999286	1	1	0.5	0.507321	1	1	0.814099
Monastrol	0.999993	0.948907	0.997491	1	0.5	0	0.484505	0.999286	0	0	0.5	0.899033	0	1	0.965506
monodictyochromone a	6.1e-05	0.895699	1e-06	0	0.002283	0	0.214624	0.001321	0	0	0	0.001005	0	0	0.000355
monodictyochromone b	0.001581	0.070609	2e-05	0	0.001255	0	0.157527	0.001825	0.001745	0	0	0.006843	0	0	0.002814
morachalcone a	0.001581	0.070609	2e-05	0	0.001255	0	0.157527	0.001825	0.001745	0	0	0.006843	0	0	0.002814
Motesanib	1	0.999998	1	1	1	1	0.873722	0.9993	1	1	1	0.999706	1	1	0.999902
moxestrol	0.59934	0.956461	0.048212	0	0.009202	0	0.815842	0	0	0	0	0.00679	0	0	0.218114
mozavaptan	1	0.981314	0.999951	1	0.971521	1	0.602671	0.999048	1	1	1	0.999526	1	1	0.999826
mr-20814	6.1e-05	0.895699	1e-06	0	0.002283	0	0.214624	0.001321	0	0	0	0.001005	0	0	0.000355
muraglitazar	0.005726	0.102552	0.001566	0	0.002994	0	0.137391	0	0	0	0	0.003243	0	0	0.003512
muscarin	1	0.999991	0.998076	1	0.981756	1	0.92321	0.998361	1	1	1	0.999709	1	1	0.999262
Myo-Inositol	0.999949	0.980957	0.999564	1	0.999476	1	0.66971	0.999286	1	1	1	0.999367	1	1	0.999627
Myricetin	0.01326	0.725928	0.022843	0	0.171146	0.018868	0.394689	0	0	0	0	0.004879	0.018868	0	0.013661
myrtecaine	0.976243	0.983175	0.98366	1	1	1	0.645515	0.999286	1	1	1	0.899476	1	1	0.953126
n-((2s,3r)-4-((s)-1-(cyclohexylamino)-1-oxopropan-2-ylamino)-3-hydroxy-1-phenylbutan-2-yl)-3-(methylsulfonyl)benzamide	0.067623	0.058092	0.000105	0	0.051587	0.013889	0.265131	0.020408	0.017143	0	0	0.008943	0.013889	0	0.025557
n-((5-chloro-8-hydroxyquinolin-7-yl)(4-methoxyphenyl)methyl)-2-phenoxyacetamide	0.320202	0.904865	0.000492	0	0.00122	0	0.490976	0	0	0	0	0.103243	0	1	0.141313
n-((r)-9-amino-4-oxo-1-phenyl-3,4,6,7-tetrahydro[1,4]diazepino[6,7,1-hi]indol-3-yl)nicotinamide	0.145502	0.075649	0.017503	0	0.017182	0	0.013901	0	0	0	0.1	0.499914	0	0	0.220973
n-((r)-9-methyl-4-oxo-1-phenyl-3,4,6,7-tetrahydro[1,4]diazepino[6,7,1-hi]indol-3-yl)isonicotinamide	0.145502	0.075649	0.017503	0	0.017182	0	0.013901	0	0	0	0.1	0.499914	0	0	0.220973
n-((s)-1-carbamimidoyl-2-hydroxy-piperidin-3-yl)-2-((s)-2-oxo-3-phenylmethanesulfonylamino-azepan-1-yl)-acetamide	0.091728	0.662022	8.8e-05	0	0.00122	0	0.442107	0	0	0	0	0.003654	0	0	0.031823
n-((s)-1-carbamimidoyl-2-hydroxy-piperidin-3-yl)-2-((s)-2-oxo-3-phenylmethanesulfonylamino-piperidin-1-yl)-acetamide	0.057491	0.82576	7.4e-05	0	0.00122	0	0.495848	0	0	0	0	0.003654	0	0	0.020406
n-((s)-1-ethoxymethyl-3-methyl-butyl)-4-(2-methyl-imidazo[4,5-c]pyridin-1-ylmethyl)-benzenesulfonamide	1	0.964733	0.999947	1	0.961793	1	0.604879	1	1	1	1	0.99911	1	1	0.999686
n-((s)-1-formyl-4-guanidino-butyl)-2-((s)-2-oxo-3-phenylmethanesulfonylamino-piperidin-1-yl)-acetamide	0.999935	0.99999	0.999539	1	0.97412	1	0.974446	0.999238	1	1	1	0.997747	1	1	0.999074
n-((s)-2-hydroxy-1,3,10-trimethoxy-9-oxo-5,6,7,9-tetrahydro-benzo[a]heptalen-7-yl)-acetamide	0.776773	0.025956	0.997966	1	1	1	0.396082	0.999286	1	1	0.8	0.997541	1	1	0.924093
n-((s)-2'-oxo-1,1',2',3-tetrahydrospiro[indene-2,3'-pyrrolo[2,3-b]pyridine]-5-yl)-2-(4-oxo-2a,3,4,5-tetrahydropyrrolo[4,3,2-de]quinolin-1(2h)-yl)acetamide 1	0.443364	0.938198	0.002444	0	0	0	0.510701	0	0	0	0.2	0.299912	0	1	0.248574
n-((s)-4-methyl-1-oxo-1-((s)-5-phenyl-1-(phenylsulfonyl)pent-1-en-3-ylamino)pentan-2-yl)morpholine-4-carboxamide	0.99997	0.978039	0.999968	1	0.996064	1	0.703435	1	1	1	1	0.997794	1	1	0.999244
n-(1-(2,4-dimethylphenylamino)-3-(4-hydroxyphenyl)-1-oxopropan-2-yl)-2-(4-methoxybenzamido)benzamide	1	0.999961	0.999156	1	0.982856	1	0.584027	0.999287	1	1	1	1	1	1	0.999719
n-(1-(3-benzyl-7-chloro-4-oxo-3,4-dihydroquinazolin-2-yl)propyl)-4-bromo-n-(3-(dimethylamino)propyl)benzamide	0.999993	0.948907	0.997491	1	0.5	0	0.484505	0.999286	0	0	0.5	0.899033	0	1	0.965506
n-(1-acetylpiperidin-4-yl)-n'-(adamant-1-yl)urea	0.885552	0.799054	0.991265	1	0	0	0.742901	0	0.017143	0	0.5	0.896481	0	1	0.924433
n-(1-methyl-2-(pyrrolidin-1-yl)-1h-benzo[d]imidazol-6-yl)-2-(4-(trifluoromethyl)phenoxy)acetamide	1	0.959977	0.999976	1	0.966915	1	0.603607	1	1	1	1	0.998974	1	1	0.99965
n-(2-((2-(dimethylamino)ethyl)(methyl)amino)-1-methyl-1h-benzo[d]imidazol-6-yl)-2-(4-(trifluoromethyl)phenoxy)acetamide	1	0.964691	0.999886	1	0.999476	1	0.63393	0.999286	1	1	1	0.999033	1	1	0.99964
n-(2-(1h-indol-3-yl)ethyl)-4-chloro-n-(9-methyl-9-azabicyclo[4.2.1]non-2-en-3-yl)benzamide	0.59846	0.752582	0.004406	1	0.03229	0	0.433659	0	0	0	0	0.30082	0	0	0.301228
n-(2-(3-(piperazin-1-ylmethyl)imidazo[2,1-b]thiazol-6-yl)phenyl)quinoxaline-2-carboxamide	0.02135	0.774206	6.7e-05	0	0.00122	0	0.491957	0	0	0	0	0.003654	0	0	0.008357
n-(2-(4-((6-(2,6-dichlorophenyl)-8-methyl-7-oxo-7,8-dihydropyrido[2,3-d]pyrimidin-2-yl)amino)phenoxy)ethyl)-n-ethylacetamide	0.99992	0.99676	0.999993	1	0.966712	1	0.714906	1	1	1	1	0.998577	1	1	0.999496
n-(2-(7-(((4r)-4-(4-(3-(2-methoxybenzyloxy)propoxy)phenyl)piperidin-3-yloxy)methyl)-3,4-dihydroquinolin-1(2h)-yl)ethyl)acetamide	0.003594	0	0	0	0.068204	0	0	0	0	0	0	0.000672	0	0	0.001422
n-(2-(dimethylamino)ethyl)-n-(3-methoxybenzyl)-6-(1h-pyrazol-4-yl)benzo[d]thiazole-2-carboxamide	0.999814	0.995838	0.999999	1	0.999476	1	0.775532	0.999286	1	1	1	0.999033	1	1	0.999615
n-(2-(pyrrolidin-1-yl)-1h-benzo[d]imidazol-6-yl)-2-(4-(trifluoromethyl)phenoxy)acetamide	1	0.959977	0.999976	1	0.966915	1	0.603607	1	1	1	1	0.998974	1	1	0.99965
n-(2-chloro-6-methylphenyl)-2-(6-(4-(2-fluoroethyl)piperazin-1-yl)-2-methylpyrimidin-4-ylamino)thiazole-5-carboxamide	0.999803	0.995919	0.999997	1	0.999476	1	0.765683	0.999286	1	1	1	0.999033	1	1	0.999611
n-(2-hydroxyethyl)icosa-5,8,11,14-tetraenamide	0.996309	1	0.999484	1	0.989434	1	0.490665	1	1	1	1	1	1	1	0.998598
n-(2,2,2-trichloro-1-(4-chlorophenylthio)ethyl)benzamide	0.045629	0.865207	0.00122	0	0.001865	0	0.720662	0	0	0	0	0.003059	0	0	0.016636
N-(3-(Aminomethyl)Benzyl)Acetamidine	0.981515	0.09804	0.999998	1	1	1	0.096799	0.999286	1	1	1	0.995176	1	1	0.99223
n-(3-{1-4-(3,4-difluorophenoxy)benzyl]-4-piperidinyl}-4-methylphenyl)-2-methylpropanamide	1	0.959977	0.999976	1	0.966915	1	0.603607	1	1	1	1	0.998974	1	1	0.99965
n-(4-((1r,2r)-2-(dimethylamino)-1-(1h-imidazol-1-yl)propyl)phenyl)benzo[d]thiazol-2-amine	0.000258	0.126312	0.00011	0	0.002994	0	0.203996	0	0	0	0	0.003654	0	0	0.001341
n-(4-(1-(4-(4-acetylpiperazin-1-yl)cyclohexyl)-4-amino-1h-pyrazolo[3,4-d]pyrimidin-3-yl)-2-methoxyphenyl)-1-methyl-1h-indole-2-carboxamide	1	0.984812	0.999946	1	0.999476	1	0.712941	0.999286	1	1	1	0.999033	1	1	0.99966
n-(4-(2-amino-3-chloropyridin-4-yloxy)-3-fluorophenyl)-4-ethoxy-1-(4-fluorophenyl)-2-oxo-1,2-dihydropyridine-3-carboxamide	0.999998	0.988585	0.999953	1	0.999476	1	0.7172	0.999286	1	1	1	0.999033	1	1	0.999661
n-(4-(3-bromophenylamino)quinazolin-6-yl)propionamide	0.999987	0.999876	0.999962	1	0.999476	1	0.736882	0.999254	1	1	1	0.999543	1	1	0.999831
n-(4-(4-fluorophenylsulfonamido)benzyl)-2-(3-ethyl-2-(piperidin-1-yl)-3,4-dihydroquinazolin-4-yl)acetamide	0.999999	1	1	1	0.848164	1	0.999998	0.999153	1	1	1	0.9998	1	1	0.999933
n-(4-(4-methylphenylsulfonamido)benzyl)-2-(3-phenyl-2-(piperidin-1-yl)-3,4-dihydroquinazolin-4-yl)acetamide	0.999999	1	1	1	0.848164	1	0.999998	0.999153	1	1	1	0.9998	1	1	0.999933
n-(4-(6-hydroxy-3-(4-(2-(piperidin-1-yl)ethoxy)benzoyl)benzo[b]thiophen-2-yl)phenyl)-n-(methylsulfonyl)methanesulfonamide	0.880798	0.99426	0.194953	1	0.557642	0	0.420624	0	1	0	0.4	0.604199	0	0	0.559983
n-(4-(6-methoxy-7-(3-morpholinopropoxy)quinazolin-4-ylamino)phenyl)benzamide	0.999903	0.929726	0.996719	1	0.999476	1	0.551306	0.999286	1	1	1	0.999033	1	1	0.998552
n-(4-(pyridin-2-yl)thiazol-2-yl)pyridin-2-amine	0.027894	0.835532	0.000293	0	0.00122	0	0.494285	0	0	0	0	0.0021	0	0	0.010096
n-(4-{1-[2-(6-methyl-pyridin-2-yl)-ethyl]-piperidine-4-carbonyl}-phenyl)-methanesulfonamide (e-4031)	0.019609	0.71485	0.000452	0	0.066755	0	0.667752	0.023952	0	0	0	0.004863	0	0	0.008308
n-(4-fluorophenylsulfonyl)-l-valyl-l-leucinal	0.037509	0.786112	7.6e-05	0	0.00122	0	0.558118	0	0	0	0	0.0021	0	0	0.013228
N-(4-Methoxybenzyl)-N'-(5-Nitro-1,3-Thiazol-2-Yl)Urea	0.991312	0.887742	0.895233	1	1	1	0.470374	0.999286	1	0	0.3	0.499561	1	1	0.795369
n-(4-nitrobenzyl)-2-(2-(dimethylamino)-3-phenyl-3,4-dihydroquinazolin-4-yl)acetamide	0.999999	1	1	1	0.848164	1	0.999998	0.999153	1	1	1	0.9998	1	1	0.999933
n-(4-phenoxyphenyl)-4-(3-phenylpropanamido)benzamide	0.691604	0.078412	0.99863	1	1	1	0.011187	0.999253	0.972222	1	1	1	1	1	0.896744
n-(5-(5-(1-acetylpiperazine-4-carbonyl)-4-methoxy-2-methylphenylthio)thiazol-2-yl)-4-((3,3-dimethylbutan-2-ylamino)methyl)benzamide	1	0.986215	0.999934	1	0.999476	1	0.720354	0.999286	1	1	1	0.999033	1	1	0.999656
n-(5-cyclopropyl-1-quinolin-5-yl-1h-pyrazole-4-carbonyl)-guanidine	0.83478	0.940527	0.999484	1	0.998316	1	0.307197	1	1	1	1	0.792582	1	1	0.875615
n-(6-chloro-7-methoxy-9h-pyrido[3,4-b]indol-8-yl)-2-methylnicotinamide	0.982716	0.967977	0.757342	1	0.999476	1	0.696214	0.999286	1	1	1	0.899687	1	0	0.879915
n-(cis-2-aminocyclohexyl)-n-(3-chlorophenyl)-9-ethyl-9h-purine-2,6-diamine	1	0.986978	0.999906	1	0.999476	1	0.74888	0.999286	1	1	1	0.999033	1	1	0.999646
n-[(2-tert-butyl-benzenesulfonyl)-phenyl]-2,3,4-trihydroxy-5-(2-isopropyl-benzyl)-benzamide	0.998487	0.533305	0.999997	1	1	1	0.492392	0.999286	1	1	1	0.995027	1	1	0.997837
n-[(r)-1-{[acetyl-(2-methoxy-benzyl)-amino]-methyl}-2-(1h-indol-3-yl)-ethyl]-2-[1,4']bipiperidinyl-1'-yl-acetamide	1	0.999964	0.999574	1	0.990402	1	0.959188	1	1	1	1	0.999759	1	1	0.999778
n-[1-(1-amino-isoquinolin-6-ylmethyl)-2-oxo-2-piperidin-1-yl-ethyl]-3-((s)-4-methoxy-2,3,6-trimethyl-benzenesulfonylamino)-succinamic acid tert-butyl ester	0.999935	0.99999	0.999539	1	0.97412	1	0.974446	0.999238	1	1	1	0.997747	1	1	0.999074
n-[1-(8-aza-spiro[4.5]decane-8-carbonyl)-4-(4-methyl-piperazin-1-yl)-4-oxo-butyl]-3,5-dichloro-benzamide	0.018218	0.275009	0.000357	0	0.002994	0	0.363461	0	0	0	0	0.003654	0	0	0.007409
n-[1-(cyanomethyl-carbamoyl)-cyclohexyl]-4-[2-(4-methyl-piperazin-1-yl)-thiazol-4-yl]-benzamide	0.999941	0.971903	1	1	0.966262	0.996575	0.652699	0.999263	0.996575	1	1	0.998375	0.996575	1	0.999439
n-[1-{[acetyl-(2-methoxy-benzyl)-amino]-methyl}-2-(1h-indol-3-yl)-ethyl]-2-[1,4']bipiperidinyl-1'-yl-acetamide	1	0.999964	0.999574	1	0.990402	1	0.959188	1	1	1	1	0.999759	1	1	0.999778
n-[2-(2-amino-thiazol-4-yl)-1-(1-cyclohexylmethyl-2,3-dihydroxy-5-methyl-hexylcarbamoyl)-ethyl]-2-(morpholine-4-sulfonylamino)-3-phenyl-propionamide	0.003594	0	0	0	0.068204	0	0	0	0	0	0	0.000672	0	0	0.001422
n-[3-amino-4-(2-{[2-(3,4-dimethoxy-phenyl)-ethyl]-methyl-amino}-ethoxy)-phenyl]-methanesulfonamide	0.123247	0.972171	0.255899	0	0.561491	0	0.690361	0	0	0	0.1	0.399213	0	0	0.259453
n-[3-hydroxy-2,2-dimethyl-6-(4,4,4-trifluoro-butoxy)-chroman-4-yl]-n-methyl-methanesulfonamide	0.078512	0.410041	9.1e-05	0	0	0	0.522741	0	0.017143	0	0	0.006645	0	0	0.028416
n-[4-((r)-4-methyl-6-oxo-1,4,5,6-tetrahydro-pyridazin-3-yl)-phenyl]-acetamide	0.906068	0.227646	0.998356	1	1	1	0.364027	0.999286	1	1	1	0.996452	1	1	0.966959
N-[4-(3-BROMO-PHENYLAMINO)-QUINAZOLIN-6-YL]-ACRYLAMIDE	1	0.982482	0.999898	1	0.999476	1	0.688409	0.999286	1	1	1	0.999033	1	1	0.999644
n-[4-(3-fluoro-benzenesulfonylamino)-benzyl]-2-(3-phenyl-2-piperidin-1-yl-3,4-dihydro-quinazolin-4-yl)-acetamide	0.998484	0.999892	0.999996	1	0.806532	1	0.808037	0.999273	1	1	1	0.999569	1	1	0.99935
n-[4-(4-benzhydryl-piperazin-1-yl)-butyl]-3-(6-methyl-pyridin-3-yl)-acrylamide	0.816674	0.370359	0.099328	1	0.763221	1	0.037649	0.999244	1	0	0.1	1	1	0	0.638667
n-[5-(3-dimethylaminobenzamido)-2-methylphenyl]-4-hydroxybenzamide	0.999736	0.942534	0.995416	1	0.999476	1	0.580775	0.999286	1	1	1	0.999033	1	1	0.998062
n-[6-(2,4-difluoro-phenoxy)-1-oxo-indan-5-yl]-methanesulfonamide	0.11457	0.999804	0.000434	0	0.033704	0	0.79768	0	0	0	0	0.00356	0	0	0.039521
n-[6-(2,4-difluoro-phenylsulfanyl)-1-oxo-indan-5-yl]-methanesulfonamide	0.993886	0.999963	0.999783	1	0.999038	1	0.991863	1	1	1	1	0.996924	1	1	0.996864
n-{(s)-1-[(s)-1-((1s,2r,3s)-4-azido-1-cyclohexylmethyl-2,3-dihydroxy-butylcarbamoyl)-2-(3h-imidazol-4-yl)-ethylcarbamoyl]-2-phenyl-ethyl}-isobutyramide	0.002072	0	2.1e-05	0	0.080865	0	0	0	0	0	0	0.000581	0	0	0.000891
n-{1-(2,2-dimethyl-[1,3]dioxolan-4-yl)-2-[4-(4-trifluoromethoxy-phenoxy)-benzenesulfonyl]-ethyl}-n-hydroxy-formamide(abt-518)	0.960501	0.339247	0.999619	1	1	1	0.416346	0.999286	1	1	0.9	0.96039	1	1	0.973504
n-{3-[2-(3,4-dimethoxy-phenyl)-ethylamino]-propyl}-4-nitro-benzamide	0.976243	0.983175	0.98366	1	1	1	0.645515	0.999286	1	1	1	0.899476	1	1	0.953126
n-{3-[3-((r)-5-cyclohexyl-1-methyl-2-oxo-2,3-dihydro-1h-benzo[e][1,4]diazepin-3-yl)-ureido]-benzoyl}-2-methyl-benzenesulfonamide	1	0.951085	0.999844	1	0.999476	1	0.564821	0.999286	1	1	1	0.999033	1	1	0.999626
n-{3-[3-(4-fluorophenoxy)phenyl]-1-methylprop-2-ynyl}-n-hydroxyurea	0.816674	0.370359	0.099328	1	0.763221	1	0.037649	0.999244	1	0	0.1	1	1	0	0.638667
n-{3-[5-(4-fluorophenoxy)furan-2-yl]-1-methylprop-2-ynyl}-n-hydroxyurea	0.816674	0.370359	0.099328	1	0.763221	1	0.037649	0.999244	1	0	0.1	1	1	0	0.638667
n-{4-[3-(4-tert-butyl-benzyl)-thioureidomethyl]-2-fluoro-phenyl}-methanesulfonamide	0.073885	0.843508	4.9e-05	0	0.040496	0	0.720855	0	0	0	0	0.003172	0	0	0.025702
n-{4-[4-(2,3-dichloro-phenyl)-piperazin-1-yl]-but-2-enyl}-4-pyridin-2-yl-benzamide	1	0.950678	0.999719	1	0.966712	1	0.5055	1	1	1	1	0.999213	1	1	0.999644
n-{4-[4-(4'-chloro-biphenyl-2-ylmethyl)-piperazin-1-yl]-benzoyl}-4-((r)-3-dimethylamino-1-phenylsulfanylmethyl-propylamino)-3-nitro-benzenesulfonamide	0.906382	0.304647	0.999998	1	1	1	0.312808	0.999286	1	1	1	0.995027	1	1	0.967136
n-{4-oxo-2-propyl-3-[2'-(1h-tetrazol-5-yl)-biphenyl-4-ylmethyl]-3,4-dihydro-quinazolin-6-yl}-n-pentyl-benzamide	1	0.999769	0.999963	1	0.984826	1	0.717874	0.998403	1	1	1	0.999438	1	1	0.9998
n-{5-[1-(3-{[bis(4-fluorophenyl)acetyl]amino}propyl)-4-piperidinyl]-2,4-difluorophenyl}-2-methylpropanamide	1	0.959977	0.999976	1	0.966915	1	0.603607	1	1	1	1	0.998974	1	1	0.99965
n-allylnormetazocine	1	0.983954	0.999984	1	0.954298	1	0.673481	0.999263	1	1	1	0.999275	1	1	0.999753
n-benzyl-2-(2-(methyl(5-(pyrrolidin-1-yl)pentyl)amino)-3-phenyl-3,4-dihydroquinazolin-4-yl)acetamide	0.999999	1	1	1	0.848164	1	0.999998	0.999153	1	1	1	0.9998	1	1	0.999933
n-benzyl-2-(3-phenyl-2-(piperidin-1-yl)-3,4-dihydroquinazolin-4-yl)acetamide	0.999999	1	1	1	0.848164	1	0.999998	0.999153	1	1	1	0.9998	1	1	0.999933
n-benzyl-2-{3-biphenyl-4-yl-2-[(5-dimethylamino-pentyl)-methyl-amino]-3,4-dihydro-quinazolin-4-yl}-acetamide	0.998484	0.999892	0.999996	1	0.806532	1	0.808037	0.999273	1	1	1	0.999569	1	1	0.99935
n-cyclobutylmethylmorphinan-3-amino-urea	1	0.999997	0.999977	1	0.993962	1	0.999912	0.997571	1	1	1	0.999711	1	1	0.999896
n-cyclohexyl-n-methyl-4-(2-methyl-benzoimidazol-1-ylmethyl)-benzenesulfonamide	1	0.999991	0.998177	1	0.996214	1	0.991901	1	1	1	1	0.999498	1	1	0.999225
n-cyclopropylmethylmorphinan-3-amino-urea	1	0.999997	0.999977	1	0.993962	1	0.999912	0.997571	1	1	1	0.999711	1	1	0.999896
n-dealkylated derivative	1	0.999673	0.999911	1	0.937133	0.999036	0.995933	1	0.999036	1	1	0.999808	0.999036	1	0.999906
n-desethyl brinzolamide	0.97162	0.080163	0.999639	1	1	1	0.124021	0.999286	1	1	1	0.996794	1	1	0.989351
n-ethyl-5-(5-nitrothiazol-2-ylthio)-1,3,4-thiadiazol-2-amine	0.998649	0.914134	0.984403	1	0.999476	1	0.504717	0.999286	1	1	1	0.878481	1	1	0.953844
N-Ethylmaleimide	0.762857	0.629065	0.042065	1	0	0	0.633098	0	0.017143	0	0.1	0.988148	0	0	0.59769
n-hydroxy-2-{3-methyl-3-[4-(2-methyl-quinolin-4-ylmethoxy)-phenyl]-2-oxo-pyrrolidin-1-yl}-propionamide	0.999379	0.391685	0.999496	1	0.826522	0	0.673327	1	0	1	0.5	0.998221	0	1	0.999032
n-hydroxy-3-(4-((2-morpholinoethoxyimino)methyl)phenyl)acrylamide	0.883694	0.25137	0.999994	0	0.502994	1	0.264043	0.999286	1	1	0.5	0.21076	1	1	0.698149
n-hydroxy-3-(4-((4-nitrobenzyloxyimino)methyl)phenyl)acrylamide	0.957021	0.309601	0.999984	1	0.981132	1	0.29115	0.999286	0	1	1	0.404878	1	1	0.787294
n-hydroxy-3-(4-((perfluorobenzyloxyimino)methyl)phenyl)acrylamide	0.882371	0.251727	0.999993	0	0.502994	1	0.26649	0.999286	1	1	0.5	0.21076	1	1	0.697708
n-hydroxy-5-(1-methyl-3-(trifluoromethyl)-1h-pyrazol-5-yl)thiophene-2-carboxamide	0.691604	0.078412	0.99863	1	1	1	0.011187	0.999253	0.972222	1	1	1	1	1	0.896744
n-hydroxy-n-[(6-phenoxy-2h-chromen-3-yl)methyl]urea	0.982527	0.077578	0.999997	1	1	1	0.089285	0.999286	1	1	1	0.996794	1	1	0.993106
n-methyl-2-phenyl-n-(2-pyrrolidin-1-yl-1-oxa-spiro[4.5]dec-8-yl)-acetamide	1	0.999998	0.999531	1	0.991793	1	0.998451	1	1	1	1	0.999793	1	1	0.999775
n-methyl-n-[4-(7-methyl-1h-imidazo[4,5-f]quinolin-9-ylamino)-phenyl]-acetamide	0.000204	0.724958	1e-06	0	0.022945	0	0.166177	0.001508	0	0	0	0.00245	0	0	0.000885
N-Methyl-N-Propargyl-3-(2,4-Dichlorophenoxy)Propylamine	0.99934	0.578637	0.999998	1	1	1	0.478001	0.999286	1	1	1	0.995027	1	1	0.998122
n-methyl((1r,2s)-1-(4-(trifluoromethyl)phenoxy)-2,3-dihydro-1h-inden-2-yl)methanamine	0.98449	0.692801	0.999361	1	0.930826	1	0.173658	1	1	1	1	0.999573	1	1	0.994475
n-methypachysamine a	0.991224	0.89831	0.975484	1	1	1	0.714271	0.999179	1	1	1	0.997448	1	1	0.988052
n-phenyl-4-(3-phenyl-1,2,4-thiadiazol-5-yl)piperazine-1-carboxamide	0.373377	0.079794	0.89779	1	1	1	0.245342	0.999286	1	1	0.7	0.856144	1	1	0.709103
n-phenyl-4-(quinolin-3-ylmethyl)piperidine-1-carboxamide	0.373377	0.079794	0.89779	1	1	1	0.245342	0.999286	1	1	0.7	0.856144	1	1	0.709103
n-tert-butyl-n'-[2-(4-methylphenylamino)-5-nitrobenzenesulfonyl]urea	1	0.999932	0.994779	1	0.52764	0	0.097112	1	0	0	0.8	0.500205	0	1	0.831661
n,1,4,4-tetramethyl-8-{[4-(4-methylpiperazin-1-yl)phenyl]-amino}-4,5-dihydro-1h-pyrazolo[4,3-h]quinazoline-3-carboxamide	1	0.976481	0.999911	1	0.999476	1	0.663923	0.999286	1	1	1	0.999033	1	1	0.999648
n,n-dipropyl-n'-[4-({[(1h-imidazol-2-yl)methyl][(1-methyl-1h-imidazol-2-yl)methyl]amino}methyl)benzyl]-n'-methylbutane-1,4-diamine tri-(2r,3r)-tartrate	1	0.99594	0.999946	1	0.974609	1	0.766263	0.999265	1	1	1	0.999577	1	1	0.999841
n,n,2-trimethyl-5-nitrobenzenesulfonamide	0.97248	0.080932	0.851396	1	1	1	0.137506	0.999286	1	1	1	0.576749	1	1	0.800208
n,n'-(1,4-phenylenebis(methylene))dipyridin-2-amine	1	0.977923	0.999913	1	0.96182	0.998909	0.749365	0.997619	0.998909	1	1	0.999095	0.998909	1	0.999669
n,n'-di-o-tolyl-guanidine	0.715466	0.461083	0.110001	1	0.00122	0	0.396156	0	0	0	0.3	0.100466	0	0	0.308644
n*1*-[2,2-dimethyl-1-(1-phenyl-ethylcarbamoyl)-propyl]-n*4*-hydroxy-2-[3-(2-methyl-biphenyl-4-yl)-propyl]-succinamide	0.999548	0.983279	0.995874	1	0.963325	0.9875	0.737787	0.997619	1	1	1	0.998713	0.9875	1	0.998045
n*4*-(3-bromo-phenyl)-n*6*-methyl-pyrido[3,4-d]pyrimidine-4,6-diamine	0.999747	0.972384	0.993958	1	0.999476	1	0.675158	0.999286	1	1	1	0.999367	1	1	0.99769
n*4*-hydroxy-n*1*-[(s)-1-((s)-2-hydroxymethyl-pyrrolidine-1-carbonyl)-2-methyl-propyl]-2-(r)-pentyl-succinamide	0.815614	0.841158	0.999484	1	0.996064	1	0.372752	1	1	1	1	0.792582	1	1	0.869226
n1-((4s,5s,7r)-5-hydroxy-8-((s)-1-(isopropylamino)-3-methyl-1-oxobutan-2-ylamino)-2,7-dimethyl-8-oxooctan-4-yl)-5-(n-methylmethan-3-ylsulfonamido)-n3-((r)-1-phenylethyl)isophthalamide	0.921542	0.030615	0.997929	1	1	1	0.356023	0.999286	1	1	1	0.997541	1	1	0.972337
n1-(1,8-dimethylimidazo[1,2-a]quinoxalin-4-yl)ethane-1,2-diamine	0.996584	0.942378	0.942501	1	0.999476	1	0.588794	0.999286	1	1	1	0.999033	1	1	0.979373
n1-hydroxy-n8-(4-phenylthiazol-2-yl)octanediamide	0.439757	0.500655	0.999096	1	0.353974	1	0.286315	1	0	0	0.4	0.500637	1	1	0.646497
n1,n8-bis(6-(2-methoxybenzylamino)hexyl)octane-1,8-diamine tetrahydrochloride	1	0.999991	0.998076	1	0.981756	1	0.92321	0.998361	1	1	1	0.999709	1	1	0.999262
n2-(2-(4-(2,4-dichlorophenyl)-5-(1h-imidazol-2-yl)pyrimidin-2-ylamino)ethyl)-5-nitropyridine-2,6-diamine	0.042598	0.793107	8.5e-05	0	0.00122	0	0.493474	0	0	0	0	0.003654	0	0	0.015446
n2-[(2,2-diphenylethoxy)acetyl]-l-arginine	1	0.941399	0.999844	1	0.999476	1	0.524218	0.999286	1	1	1	0.999033	1	1	0.999626
n4-(6-((6-amino-2-methyl-4-quinolinyl)amino)hexyl)-2-methyl-4,6-quinolinediamine acetate	0.996338	1	0.999484	1	0.989434	1	0.379816	1	1	1	1	1	1	1	0.998607
naloxonazine	1	0.983954	0.999984	1	0.954298	1	0.673481	0.999263	1	1	1	0.999275	1	1	0.999753
naltrindole	1	0.983954	0.999984	1	0.954298	1	0.673481	0.999263	1	1	1	0.999275	1	1	0.999753
naphthalen-2-ol	7.9e-05	0.826487	1e-06	0	0.001935	0	0.251816	0	0	0	0	0.001219	0	0	0.000433
naphthalene-1-sulfonic acid [2-(4-{[(1-hydroxy-7-methoxy-1,2,3,4-tetrahydro-naphthalen-1-ylmethyl)-amino]-methyl}-piperidin-1-yl)-ethyl]-amide	1	0.935713	0.999811	1	0.999476	1	0.498245	0.999286	1	1	1	0.997004	1	1	0.998938
Naringenin	0.05558	0.284502	6.1e-05	0	0.142857	0	0.406627	0	0	0	0	0.003654	0	0	0.019765
narphen	1	0.999995	0.999975	1	1	1	0.712236	0.997163	1	1	1	0.999157	1	1	0.999711
nbqx	0.058223	0.926656	0.00057	0	0.007229	0	0.453625	0	0	0	0	0.000699	0	0	0.019831
nci-10777	0.0003	0.840435	0	0	0.003363	0.002132	0.197301	0.004392	0.002132	0	0	0.003543	0.002132	0	0.001281
nci-176327	0.000204	0.724958	1e-06	0	0.022945	0	0.166177	0.001508	0	0	0	0.00245	0	0	0.000885
nci-180973	0.000204	0.724958	1e-06	0	0.022945	0	0.166177	0.001508	0	0	0	0.00245	0	0	0.000885
nci-24915	0.000204	0.724958	1e-06	0	0.022945	0	0.166177	0.001508	0	0	0	0.00245	0	0	0.000885
nci-293015	0.000204	0.724958	1e-06	0	0.022945	0	0.166177	0.001508	0	0	0	0.00245	0	0	0.000885
nci-320000	0.000204	0.724958	1e-06	0	0.022945	0	0.166177	0.001508	0	0	0	0.00245	0	0	0.000885
nci-343513	0.000204	0.724958	1e-06	0	0.022945	0	0.166177	0.001508	0	0	0	0.00245	0	0	0.000885
Neamine	0.763195	0.999547	0.999481	1	0.845681	1	0.517942	1	1	1	1	0.804282	1	1	0.855653
nectandrin b	0.925007	0.209534	0.001517	0	0.029373	0.00141	0.564579	1	0.00141	1	0.2	0.000126	0.00141	0	0.308883
neocalycopteron	0.99022	0.223487	0.002152	1	0.68602	0.993631	0.581448	0.001529	1	0	0.4	0.400414	0.993631	0	0.464262
neplanocin a	0.967943	0.621399	0.999998	1	1	1	0.424891	0.999286	1	1	0.4	0.995027	1	1	0.987656
neurokinin a	1	0.984625	0.999875	1	0.981987	1	0.593063	0.999251	1	1	1	1	1	1	0.999958
nibr-1282	0.000192	0.500758	6.3e-05	0	0.00122	0	0.382301	0	0	0	0	0.003654	0	0	0.001303
Nicotinamide	0.991905	0.11141	0.999998	1	1	1	0.10218	0.999286	1	1	1	0.995176	1	1	0.995693
Niflumic Acid	0.113172	0.324901	0.016179	0	0.002994	0	0.354656	0	0	0	0	0.007492	0	0	0.045614
nifursol	0.000258	0.126312	0.00011	0	0.002994	0	0.203996	0	0	0	0	0.003654	0	0	0.001341
nipecotic acid	0.00655	0.310407	7.5e-05	0	0.00122	0	0.338631	0	0	0	0	0.003654	0	0	0.003426
nisoxetine	0.07959	0	0	0	0.054038	0	0	0	0	0	0	0.000854	0	0	0.026815
nitd609	0.000214	0.509885	6.3e-05	0	0.00122	0	0.386022	0	0	0	0	0.003654	0	0	0.00131
nobiletin	0.397152	0.385991	0.00207	0	0	0	0.457823	0	0	0	0.2	0.105344	0	0	0.168189
nocardimicin a	1	0.999999	0.999997	1	0.976666	1	0.793545	1	1	1	1	0.999535	1	1	0.999844
nocardimicin b	1	0.97232	0.999863	1	0.969747	1	0.664403	0.999262	1	1	1	0.99977	1	1	0.999878
nocodazole	0.037216	0.257086	6.2e-05	0	0.142857	0	0.433453	0	0	0	0	0.003654	0	0	0.013644
norclozapine	0.976243	0.983175	0.98366	1	1	1	0.645515	0.999286	1	1	1	0.899476	1	1	0.953126
norharman	0.998516	0.903489	0.986099	1	0.999476	1	0.481864	0.999286	1	1	1	0.997337	1	1	0.993984
normeperidine	1	0.999997	0.999977	1	0.993962	1	0.999912	0.997571	1	1	1	0.999711	1	1	0.999896
norverapamil	0.640369	0.991962	0.995221	0	0.832237	0	1	0.997477	0.993289	1	0.8	0.200108	0	1	0.611899
noscapine	0.000258	0.126312	0.00011	0	0.002994	0	0.203996	0	0	0	0	0.003654	0	0	0.001341
np-506	0.999985	0.992656	0.999977	1	0.999476	1	0.751538	0.999286	1	1	1	0.999033	1	1	0.999665
ns-398	0.013453	0.201164	6.2e-05	0	0.495645	0.013889	0.328839	0.020408	0.017143	0	0	0.003187	0.013889	0	0.005567
nsc-106080	0.201789	0.100888	0.001143	0	0	0	0.135976	0	0	0	0	0.002044	0	0	0.068325
nsc-106547	0.996338	1	0.999484	1	0.989434	1	0.379816	1	1	1	1	1	1	1	0.998607
nsc-106969	0.776773	0.025956	0.997966	1	1	1	0.396082	0.999286	1	1	0.8	0.997541	1	1	0.924093
nsc-106970	0.776773	0.025956	0.997966	1	1	1	0.396082	0.999286	1	1	0.8	0.997541	1	1	0.924093
nsc-117079	0.077993	0.955909	0.00011	0	0.00122	0	0.739602	0	0	0	0	0.001616	0	0	0.026573
nsc-119910	0.077993	0.955909	0.00011	0	0.00122	0	0.739602	0	0	0	0	0.001616	0	0	0.026573
nsc-122427	0.001581	0.070609	2e-05	0	0.001255	0	0.157527	0.001825	0.001745	0	0	0.006843	0	0	0.002814
nsc-134146	0.077993	0.955909	0.00011	0	0.00122	0	0.739602	0	0	0	0	0.001616	0	0	0.026573
nsc-134149	0.077993	0.955909	0.00011	0	0.00122	0	0.739602	0	0	0	0	0.001616	0	0	0.026573
nsc-161613	1	0.992992	0.998585	1	0.999476	1	0.839074	0.999286	1	1	1	0.899796	1	0	0.966127
nsc-168805	0.397152	0.385991	0.00207	0	0	0	0.457823	0	0	0	0.2	0.105344	0	0	0.168189
nsc-172033	0.982527	0.077578	0.999997	1	1	1	0.089285	0.999286	1	1	1	0.996794	1	1	0.993106
nsc-2113	0.201789	0.100888	0.001143	0	0	0	0.135976	0	0	0	0	0.002044	0	0	0.068325
nsc-22357	1	0.984303	0.999943	1	0.999476	1	0.711016	0.999286	1	1	1	0.999033	1	1	0.999659
nsc-224124	0.201789	0.100888	0.001143	0	0	0	0.135976	0	0	0	0	0.002044	0	0	0.068325
nsc-238187	0.02404	0.930317	0.047245	0	0.00122	0	0.53	0	0	0	0	0.10115	0	0	0.057478
nsc-25247	0.077993	0.955909	0.00011	0	0.00122	0	0.739602	0	0	0	0	0.001616	0	0	0.026573
nsc-25415	0.201789	0.100888	0.001143	0	0	0	0.135976	0	0	0	0	0.002044	0	0	0.068325
nsc-27236	0.01883	0.843215	0.001955	0	0.075787	0	0.733055	0	0	0	0	0.001399	0	0	0.007395
nsc-275420	0.996338	1	0.999484	1	0.989434	1	0.379816	1	1	1	1	1	1	1	0.998607
nsc-278214	0.000204	0.724958	1e-06	0	0.022945	0	0.166177	0.001508	0	0	0	0.00245	0	0	0.000885
nsc-287088	0.999999	0.999998	1	1	0.983897	1	0.889543	1	1	1	1	1	1	1	1
nsc-289311	6.1e-05	0.895699	1e-06	0	0.002283	0	0.214624	0.001321	0	0	0	0.001005	0	0	0.000355
nsc-292213	0.982527	0.077578	0.999997	1	1	1	0.089285	0.999286	1	1	1	0.996794	1	1	0.993106
nsc-300853	0.201789	0.100888	0.001143	0	0	0	0.135976	0	0	0	0	0.002044	0	0	0.068325
nsc-306843	0.201789	0.100888	0.001143	0	0	0	0.135976	0	0	0	0	0.002044	0	0	0.068325
nsc-316158	0.201789	0.100888	0.001143	0	0	0	0.135976	0	0	0	0	0.002044	0	0	0.068325
nsc-32082	0.030839	0.109119	2.1e-05	0	0.215909	0	0.188753	0	0	0	0.1	0.0013	0	0	0.01072
nsc-332172	0.996338	1	0.999484	1	0.989434	1	0.379816	1	1	1	1	1	1	1	0.998607
nsc-339580	0.201789	0.100888	0.001143	0	0	0	0.135976	0	0	0	0	0.002044	0	0	0.068325
nsc-339583	0.201789	0.100888	0.001143	0	0	0	0.135976	0	0	0	0	0.002044	0	0	0.068325
nsc-33994	0.999988	0.953723	0.998458	1	0.999476	1	0.60799	0.999286	1	1	1	0.999033	1	1	0.99916
nsc-34319	0.776795	0.214784	0.999997	0	0.002994	0	0.149839	0.999286	0	0	0.3	0.407436	0	1	0.728076
nsc-34928	0.985284	0.998616	0.997075	1	0.672157	0	0.899048	0.997619	1	1	0.8	0.898713	0	1	0.960358
nsc-35350	0.024523	0.656158	0.000326	0	0.00122	0	0.555809	0	0	0	0	0.005012	0	0	0.009954
nsc-354279	0.201789	0.100888	0.001143	0	0	0	0.135976	0	0	0	0	0.002044	0	0	0.068325
nsc-356483	6.1e-05	0.895699	1e-06	0	0.002283	0	0.214624	0.001321	0	0	0	0.001005	0	0	0.000355
nsc-356819	0.201789	0.100888	0.001143	0	0	0	0.135976	0	0	0	0	0.002044	0	0	0.068325
nsc-364366	0.978517	0.796223	0.999996	1	0.981132	1	0.574235	0.999286	1	1	1	0.888148	1	1	0.955553
nsc-368272	6.1e-05	0.895699	1e-06	0	0.002283	0	0.214624	0.001321	0	0	0	0.001005	0	0	0.000355
nsc-368280	6.1e-05	0.895699	1e-06	0	0.002283	0	0.214624	0.001321	0	0	0	0.001005	0	0	0.000355
nsc-369087	6.1e-05	0.895699	1e-06	0	0.002283	0	0.214624	0.001321	0	0	0	0.001005	0	0	0.000355
nsc-381864	0.201789	0.100888	0.001143	0	0	0	0.135976	0	0	0	0	0.002044	0	0	0.068325
nsc-4060	0.014582	0.083494	0.000313	0	0.051587	0.013889	0.379138	0.020408	0.017143	0	0	0.003408	0.013889	0	0.006101
nsc-407229	0.000611	0.15561	2.3e-05	0	0.256439	0	0.324263	0	0	0	0	0.0013	0	0	0.000644
nsc-407296	0.905185	0.026104	0.997963	1	1	1	0.380321	0.999286	1	1	1	0.997541	1	1	0.966896
nsc-407436	0.005084	0.135561	6.2e-05	0	0.085892	0.013889	0.312153	0.020408	0.017143	0	0	0.003654	0.013889	0	0.002933
nsc-43318	0.000258	0.126312	0.00011	0	0.002994	0	0.203996	0	0	0	0	0.003654	0	0	0.001341
nsc-45174	0.999726	0.58619	0.999998	1	1	1	0.471702	0.999286	1	1	1	0.995027	1	1	0.998251
nsc-45586	0.056118	0.861638	0.001042	0	0.009801	0	0.770364	0	0	0	0	0.003059	0	0	0.020073
nsc-45618	0.077993	0.955909	0.00011	0	0.00122	0	0.739602	0	0	0	0	0.001616	0	0	0.026573
nsc-45622	0.978517	0.796223	0.999996	1	0.981132	1	0.574235	0.999286	1	1	1	0.888148	1	1	0.955553
nsc-47091	1	0.976392	0.999461	1	0.999476	1	0.700265	0.999286	1	1	1	0.999033	1	1	0.999498
nsc-47751	0.978517	0.796223	0.999996	1	0.981132	1	0.574235	0.999286	1	1	1	0.888148	1	1	0.955553
nsc-47762	0.910226	0.774034	0.684297	1	0.981132	1	0.650048	0.999286	1	1	1	0.524099	1	0	0.706207
nsc-50187	0.473684	0.224833	0.917386	0	0.639706	0	0.023742	0.997619	1	0	0.2	0.211329	0	0	0.534133
nsc-50393	0.001386	0.116364	2.5e-05	0	0.03229	0	0.367658	0	0	0	0	0.0013	0	0	0.000903
nsc-521777	0.00898	0.882288	0.04229	0	0.00122	0	0.619964	0	0	0	0	0.122561	0	0	0.057943
nsc-53909	0.397152	0.385991	0.00207	0	0	0	0.457823	0	0	0	0.2	0.105344	0	0	0.168189
nsc-58057	0.978517	0.796223	0.999996	1	0.981132	1	0.574235	0.999286	1	1	1	0.888148	1	1	0.955553
nsc-58058	0.978517	0.796223	0.999996	1	0.981132	1	0.574235	0.999286	1	1	1	0.888148	1	1	0.955553
nsc-600586	0.201789	0.100888	0.001143	0	0	0	0.135976	0	0	0	0	0.002044	0	0	0.068325
nsc-61837	0.384934	0.424383	0.002295	0	0.071429	0	0.472492	0	0	0	0	0.090726	0	0	0.159318
nsc-621351	0.996338	1	0.999484	1	0.989434	1	0.379816	1	1	1	1	1	1	1	0.998607
nsc-637992	0.201789	0.100888	0.001143	0	0	0	0.135976	0	0	0	0	0.002044	0	0	0.068325
nsc-637993	0.201789	0.100888	0.001143	0	0	0	0.135976	0	0	0	0	0.002044	0	0	0.068325
nsc-637994	0.201789	0.100888	0.001143	0	0	0	0.135976	0	0	0	0	0.002044	0	0	0.068325
nsc-640558	0.201789	0.100888	0.001143	0	0	0	0.135976	0	0	0	0	0.002044	0	0	0.068325
nsc-640559	0.201789	0.100888	0.001143	0	0	0	0.135976	0	0	0	0	0.002044	0	0	0.068325
nsc-640566	0.201789	0.100888	0.001143	0	0	0	0.135976	0	0	0	0	0.002044	0	0	0.068325
nsc-640583	0.201789	0.100888	0.001143	0	0	0	0.135976	0	0	0	0	0.002044	0	0	0.068325
nsc-645811	0.201789	0.100888	0.001143	0	0	0	0.135976	0	0	0	0	0.002044	0	0	0.068325
nsc-645812	0.201789	0.100888	0.001143	0	0	0	0.135976	0	0	0	0	0.002044	0	0	0.068325
nsc-645827	0.201789	0.100888	0.001143	0	0	0	0.135976	0	0	0	0	0.002044	0	0	0.068325
nsc-645836	0.201789	0.100888	0.001143	0	0	0	0.135976	0	0	0	0	0.002044	0	0	0.068325
nsc-649091	0.201789	0.100888	0.001143	0	0	0	0.135976	0	0	0	0	0.002044	0	0	0.068325
nsc-65069	0.996338	1	0.999484	1	0.989434	1	0.379816	1	1	1	1	1	1	1	0.998607
nsc-65573	0.978517	0.796223	0.999996	1	0.981132	1	0.574235	0.999286	1	1	1	0.888148	1	1	0.955553
nsc-661755	0.982527	0.077578	0.999997	1	1	1	0.089285	0.999286	1	1	1	0.996794	1	1	0.993106
nsc-664171	0.776773	0.025956	0.997966	1	1	1	0.396082	0.999286	1	1	0.8	0.997541	1	1	0.924093
nsc-665126	0.201789	0.100888	0.001143	0	0	0	0.135976	0	0	0	0	0.002044	0	0	0.068325
nsc-665534	0.978517	0.796223	0.999996	1	0.981132	1	0.574235	0.999286	1	1	1	0.888148	1	1	0.955553
nsc-666292	6.1e-05	0.895699	1e-06	0	0.002283	0	0.214624	0.001321	0	0	0	0.001005	0	0	0.000355
nsc-667757	0.201789	0.100888	0.001143	0	0	0	0.135976	0	0	0	0	0.002044	0	0	0.068325
nsc-668394	0.995409	0.392113	0.999998	1	1	1	0.311985	0.999286	1	1	1	0.995027	1	1	0.996812
nsc-669977	0.201789	0.100888	0.001143	0	0	0	0.135976	0	0	0	0	0.002044	0	0	0.068325
nsc-676468	0.201789	0.100888	0.001143	0	0	0	0.135976	0	0	0	0	0.002044	0	0	0.068325
nsc-685596	0.002201	0.146379	3.2e-05	0	0.03229	0	0.479849	0	0	0	0	0.0013	0	0	0.001178
nsc-693571	0.201789	0.100888	0.001143	0	0	0	0.135976	0	0	0	0	0.002044	0	0	0.068325
nsc-720622	0.996338	1	0.999484	1	0.989434	1	0.379816	1	1	1	1	1	1	1	0.998607
nsc-73410	0.201789	0.100888	0.001143	0	0	0	0.135976	0	0	0	0	0.002044	0	0	0.068325
nsc-746457	0.691604	0.078412	0.99863	1	1	1	0.011187	0.999253	0.972222	1	1	1	1	1	0.896744
nsc-76061	0.000571	0.263671	7.5e-05	0	0.00122	0	0.29977	0	0	0	0	0.003654	0	0	0.001433
nsc-77833	0.99622	1	0.996249	1	0.992624	1	0.384058	0.999283	1	1	1	0.99919	1	1	0.99722
nsc-78017	0.201789	0.100888	0.001143	0	0	0	0.135976	0	0	0	0	0.002044	0	0	0.068325
nsc-7815	0.978517	0.796223	0.999996	1	0.981132	1	0.574235	0.999286	1	1	1	0.888148	1	1	0.955553
nsc-79594	0.978517	0.796223	0.999996	1	0.981132	1	0.574235	0.999286	1	1	1	0.888148	1	1	0.955553
nsc-79714	0.077993	0.955909	0.00011	0	0.00122	0	0.739602	0	0	0	0	0.001616	0	0	0.026573
nsc-79745	0.978517	0.796223	0.999996	1	0.981132	1	0.574235	0.999286	1	1	1	0.888148	1	1	0.955553
nsc-86715	0.201789	0.100888	0.001143	0	0	0	0.135976	0	0	0	0	0.002044	0	0	0.068325
nsc-8735	0.201789	0.100888	0.001143	0	0	0	0.135976	0	0	0	0	0.002044	0	0	0.068325
nsc-87877	0.999975	0.995141	0.999979	1	0.996678	0.998342	0.845263	0.996719	1	1	1	0.99963	0.998342	1	0.999862
nsc-88135	0.345266	0.500198	0.001558	0	0.00122	0	0.419822	0	0	0	0	0.0021	0	0	0.116308
nsc-93358	6.1e-05	0.895699	1e-06	0	0.002283	0	0.214624	0.001321	0	0	0	0.001005	0	0	0.000355
nsc-94258	0.022508	0.264583	0.009225	0	0	0	0.374319	0	0	0	0	0.005344	0	0	0.012359
nsc-94891	6.1e-05	0.895699	1e-06	0	0.002283	0	0.214624	0.001321	0	0	0	0.001005	0	0	0.000355
nsc-99495	0.996338	1	0.999484	1	0.989434	1	0.379816	1	1	1	1	1	1	1	0.998607
nu-2058	0.011447	0.695319	0.000132	0	0.00122	0	0.492713	0	0	0	0	0.0021	0	0	0.00456
nu-6027	0.034037	0.385976	9.5e-05	0	0.001865	0	0.57938	0	0	0	0	0.0013	0	0	0.01181
nu-6086	0.999975	0.934425	0.998387	1	0.999476	1	0.566291	0.999286	1	1	1	0.999033	1	1	0.999132
nu-6094	0.008002	0.730481	0.000168	0	0.00122	0	0.506423	0	0	0	0	0.0021	0	0	0.003423
nu-6102	0.016761	0.327837	6.1e-05	0	0.43484	0	0.586145	0	0	0	0	0.0013	0	0	0.00604
nvp-aew541	0.999923	0.996099	0.999992	1	0.999476	1	0.779617	0.999286	1	1	1	0.999033	1	1	0.999649
NVP-AUY922	0.993337	0.091628	0.999989	1	1	1	0.121278	0.999286	1	1	1	0.996794	1	1	0.996707
o-xylene	0.997365	0.375522	0.998594	1	1	1	0.445619	0.999286	1	1	1	0.993723	1	1	0.996561
ohioensin a	0.345266	0.500198	0.001558	0	0.00122	0	0.419822	0	0	0	0	0.0021	0	0	0.116308
okadaic acid	0.974187	0.100851	0.999993	1	1	1	0.156928	0.999286	1	1	1	0.883671	1	1	0.952617
oleanonic acid	0.80018	0.444843	0.001336	0	0.00122	0	0.392882	0	0	0	0	0.003243	0	0	0.268253
Oleic Acid	0.905529	0.026122	0.997963	1	1	1	0.380867	0.999286	1	1	1	0.997541	1	1	0.967011
ono-3805	0.680447	0.04891	0.997011	1	1	1	0.30899	0.999286	1	1	1	0.997541	1	1	0.891666
ONO-5046	0.053338	0.29437	8.2e-05	0	0.00122	0	0.26678	0	0	0	0	0.003654	0	0	0.019024
opc-21268	1	0.959717	0.99982	1	0.966712	1	0.539982	1	1	1	1	0.999213	1	1	0.999678
org-20494	0.906068	0.227646	0.998356	1	1	1	0.364027	0.999286	1	1	1	0.996452	1	1	0.966959
org-25543	0.99854	0.769577	0.999976	1	1	1	0.729994	0.999286	1	1	1	0.995027	1	1	0.997848
oroidin	0.99794	0.896444	0.983565	1	0.999476	1	0.475565	0.999286	1	1	1	0.799095	1	1	0.926867
osthol	0.965051	0.420649	0.999996	1	1	1	0.437714	0.999286	1	1	1	0.995551	1	1	0.986866
oxepinac	0.940947	1	9.9e-05	1	0.930826	1	0.551871	1	1	1	1	0.9	1	0	0.613682
oxethazaine	0.987588	0.984249	0.999999	1	0.746603	1	0.904555	0.998594	1	1	1	0.999902	1	1	0.99583
oxfendazole	1	0.99997	0.999419	1	0.984723	1	0.885781	0.99728	1	1	1	0.999646	1	1	0.999688
oxotremorine	1	0.97232	0.999863	1	0.969747	1	0.664403	0.999262	1	1	1	0.99977	1	1	0.999878
oxyquinoline	0.867287	0.03422	0.997868	1	1	1	0.340882	0.999286	1	1	1	0.997541	1	1	0.954232
oz-209	0.000258	0.126312	0.00011	0	0.002994	0	0.203996	0	0	0	0	0.003654	0	0	0.001341
P-Cresol	0.997365	0.375522	0.998594	1	1	1	0.445619	0.999286	1	1	1	0.993723	1	1	0.996561
P-Hydroxybenzaldehyde	0.026585	0.119083	6.1e-05	0	0.051587	0.013889	0.398191	0.020408	0.017143	0	0	0.006645	0.013889	0	0.011097
P-Hydroxybenzoic Acid	0.999987	0.999876	0.999962	1	0.999476	1	0.736882	0.999254	1	1	1	0.999543	1	1	0.999831
p7212090085	0.998955	0.995506	1	1	0.992241	1	0.79313	1	1	1	1	0.999441	1	1	0.999465
palmatine	7.4e-05	0.073124	0.000324	0	0.06043	0.001422	0.204652	0	0	0	0	0.001067	0.001422	0	0.000488
Palmitic Acid	0.133056	0.045464	0.997895	1	1	1	0.42103	0.020408	0.017143	1	0.6	0.704201	1	1	0.611718
palmostatin b	0.67596	0.995038	0.999485	1	0.996064	1	0.252364	1	1	1	1	0.898802	1	1	0.858082
Para-Xylene	0.997365	0.375522	0.998594	1	1	1	0.445619	0.999286	1	1	1	0.993723	1	1	0.996561
paraoxon	0.969075	0.447872	0.999454	1	0.973424	1	0.125155	0.997082	1	1	1	0.997382	1	1	0.988637
paratoulene sulfonamide	0.939818	0.626007	0.9992	1	0.998768	1	0.128678	1	1	1	1	0.99834	1	1	0.979119
parthenolide	0.016877	0.74872	4e-05	0	0.052994	0	0.703325	0.001383	0	0	0	0.000494	0	0	0.005804
pd-0173952	0.999992	0.990344	0.99997	1	0.999476	1	0.732008	0.999286	1	1	1	0.999033	1	1	0.999665
pd-0173956	0.999995	0.98939	0.999965	1	0.999476	1	0.717226	0.999286	1	1	1	0.999033	1	1	0.999664
pd-0173958	0.999992	0.990344	0.99997	1	0.999476	1	0.732008	0.999286	1	1	1	0.999033	1	1	0.999665
pd-0183812	0.013244	0.237647	9.7e-05	0	0.001865	0	0.584902	0	0	0	0	0.0013	0	0	0.00488
pd-0316684	0.997643	0.894788	0.981165	1	0.999476	1	0.472831	0.999286	1	1	1	0.699095	1	1	0.892634
PD-0332991	0.892873	0.447132	0.000162	0	0.00122	0	0.420261	0	0	0	0	0.003654	0	0	0.298896
pd-128763	0.999579	0.781942	0.999978	1	0.912073	1	0.647828	1	1	1	1	0.997794	1	1	0.999117
pd-140195	0.986853	1	0.999949	1	0.976954	1	0.473098	0.99926	1	1	1	0.99881	1	1	0.995204
pd-144550	0.292514	0.672783	0.93689	0	0.981132	1	0.494725	0.999286	1	1	1	0.222561	1	0	0.483989
pd-155080	1	0.992668	0.998169	1	0.982235	1	0.54988	1	1	1	1	1	1	1	0.99939
pd-160946	1	0.984625	0.999875	1	0.981987	1	0.593063	0.999251	1	1	1	1	1	1	0.999958
pd-161182	1	0.984625	0.999875	1	0.981987	1	0.593063	0.999251	1	1	1	1	1	1	0.999958
pd-163140	1	0.992668	0.998169	1	0.982235	1	0.54988	1	1	1	1	1	1	1	0.99939
pd-165929	1	0.955061	0.999891	1	0.999476	1	0.585995	0.999286	1	1	1	0.999033	1	1	0.999641
pd-166326	0.999995	0.98939	0.999965	1	0.999476	1	0.717226	0.999286	1	1	1	0.999033	1	1	0.999664
pd-17395	0.747839	0.940749	0.885932	0	0.452381	0	0.660292	0.020408	0	0	0.1	0.388316	0	1	0.674029
pd-29361	0.999748	0.999985	0.99997	1	0.99947	1	0.821312	1	1	1	1	0.999683	1	1	0.9998
PD-348292	0.249213	0.999923	0.857302	0	0	0	0.836645	0	0	0	0	0.10441	0	1	0.403642
pd-83176	0.024538	0.107853	7.4e-05	0	0.051587	0.013889	0.375641	0.020408	0.017143	0	0	0.0021	0.013889	0	0.008904
pd-98059	0.778061	0.918686	0.03627	0	0.5	0	0.520716	0.999286	0	0	0	0.102909	0	1	0.305747
pelargonidin	0.201789	0.100888	0.001143	0	0	0	0.135976	0	0	0	0	0.002044	0	0	0.068325
Pemetrexed	0.026657	0.240331	6.6e-05	0	0.4375	0.013889	0.301933	0.020408	0.017143	0	0	0.497382	0.013889	0	0.174702
penduletin	0.384934	0.424383	0.002295	0	0.071429	0	0.472492	0	0	0	0	0.090726	0	0	0.159318
pentanoic acid {4-bromo-3-[3-ethyl-4-(3-fluoro-2'-(n-t-butyloxycarbonyl)-sulfanamido-biphenyl-4-ylmethyl)-5-oxo-4,5-dihydro-[1,2,4]triazol-1-yl]-phenyl}-amide	1	0.999769	0.999963	1	0.984826	1	0.717874	0.998403	1	1	1	0.999438	1	1	0.9998
peonidin	0.201789	0.100888	0.001143	0	0	0	0.135976	0	0	0	0	0.002044	0	0	0.068325
pf-02367982	0.284095	0.983829	0.325649	0	0.308284	0.001195	0.650323	0.002358	0.001195	0	0.1	0.503038	0.001195	1	0.370927
pf-04457845	0.234956	0.063224	6e-05	0	0.051587	0.013889	0.217309	0.020408	0.017143	0	0	0.005577	0.013889	0	0.080198
pf-18298	0.999873	0.977486	0.999241	1	0.999476	1	0.657723	0.999286	1	1	1	0.999367	1	1	0.999494
pf-228	0.99999	0.948252	0.998756	1	0.999476	1	0.603192	0.999286	1	1	1	0.999033	1	1	0.999259
pf-232798	0.999942	0.973324	0.999244	1	0.999476	1	0.63011	0.999286	1	1	1	0.999033	1	1	0.999406
pf-296	0.952619	0.945198	0.688728	1	0.966712	1	0.709804	1	1	1	1	0.902305	1	1	0.847884
pf-3409409	0.00011	0.07258	0.000291	0	0.031501	0	0.217067	0	0	0	0	0.001471	0	0	0.000624
pf-431396	1	0.972969	0.999443	1	0.999476	1	0.688875	0.999286	1	1	1	0.999033	1	1	0.999492
pf-544	0.982716	0.967977	0.757342	1	0.999476	1	0.696214	0.999286	1	1	1	0.899687	1	0	0.879915
pf-562271	1	0.972969	0.999443	1	0.999476	1	0.688875	0.999286	1	1	1	0.999033	1	1	0.999492
pf-622	0.373377	0.079794	0.89779	1	1	1	0.245342	0.999286	1	1	0.7	0.856144	1	1	0.709103
pf-877423	0.045684	0.654573	0.000338	0	0.481132	0	0.647987	0	0.017143	0	0	0	0	0	0.015341
PHA-739358	0.999998	0.986515	0.999959	1	0.999476	1	0.705219	0.999286	1	1	1	0.999033	1	1	0.999663
pha-745052	0.989679	0.876353	0.874649	1	0.988155	1	0.509023	1	1	1	1	0.899637	1	1	0.921322
phenethylamine	0.000258	0.126312	0.00011	0	0.002994	0	0.203996	0	0	0	0	0.003654	0	0	0.001341
phenidone	0.065788	0.12492	2.9e-05	0	0.215909	0	0.271287	0.076923	0	0	0.1	0.0013	0	0	0.022372
phenyl-methanesulfonyl fluoride	0.373377	0.079794	0.89779	1	1	1	0.245342	0.999286	1	1	0.7	0.856144	1	1	0.709103
phenyl(thiophen-2-yl)methanone	0.815865	0.217406	0.999924	1	1	1	0.334896	0.999286	1	1	0.9	0.802334	1	1	0.872708
phenylbutyrylhydroxamic acid	0.769112	0.181284	0.999997	0	1	1	0.222332	0.999286	1	1	0.9	0.01076	1	1	0.59329
phenylpiperazine	1	0.999127	0.999948	1	0.989949	1	0.641436	1	1	1	1	0.999525	1	1	0.999824
phloridzin	0.933033	0.028431	0.99795	1	1	1	0.365237	0.999286	1	1	1	0.997541	1	1	0.976174
phlorofucofuroeckol a	0.921542	0.030615	0.997929	1	1	1	0.356023	0.999286	1	1	1	0.997541	1	1	0.972337
phosphoric acid mono-[5-(6-methylamino-purin-9-yl)-2-phosphonooxymethyl-tetrahydro-furan-3-yl] ester	0.259039	0.134505	0.937977	0	1	1	0.239986	0.999286	1	1	0.9	0.209241	1	1	0.468752
pi-103	0.991001	0.300541	0.999996	1	1	1	0.367798	0.999286	1	1	1	0.993489	1	1	0.994829
PICEATANNOL	0.999997	0.987849	0.999957	1	0.999476	1	0.720947	0.999286	1	1	1	0.999033	1	1	0.999662
Piclamilast	0.145502	0.075649	0.017503	0	0.017182	0	0.013901	0	0	0	0.1	0.499914	0	0	0.220973
picrotoxinin	0.008155	0.097849	0.000224	0	0	0	0.155097	0	0	0	0	0.003243	0	0	0.003874
pimobendane	0.906068	0.227646	0.998356	1	1	1	0.364027	0.999286	1	1	1	0.996452	1	1	0.966959
pinostrobin	0.034595	0.967562	5.3e-05	0	0.002955	0	0.611167	0.997619	0	0	0	0.000654	0	0	0.011767
pipendoxifene	0.476708	0.895928	0.02645	0	0.155068	0	0.676082	0	0	0	0	0	0	0	0.167719
piperchabamide d	0.380537	0.703523	9.6e-05	0	0.03229	0	0.46073	0	0	0	0	0.000352	0	0	0.126995
piperrolein b	0.732862	0.872792	0.003218	0	0.00122	0	0.45516	0	0	0	0	0.003654	0	1	0.246578
piroxantrone	0.904718	0.983071	0.99984	1	0.728158	1	0.599472	1	1	1	1	0.998577	1	1	0.967711
pk-11195	0.996764	1	0.999733	1	0.977227	1	0.817693	0.999304	1	1	1	0.998513	1	1	0.998337
pkf-241-466	0.699168	0.664785	0.003814	0	0.00122	0	0.567998	0	0	0	0	0.222561	0	0	0.308514
pladienolide a	0.373377	0.079794	0.89779	1	1	1	0.245342	0.999286	1	1	0.7	0.856144	1	1	0.709103
pladienolide b	0.373377	0.079794	0.89779	1	1	1	0.245342	0.999286	1	1	0.7	0.856144	1	1	0.709103
pms-601	1	0.999991	0.998177	1	0.996214	1	0.991901	1	1	1	1	0.999498	1	1	0.999225
pnu-99963	0.250488	0.249451	0.065028	0	0	0	0.355935	0	0	0	0	0.005344	0	0	0.106953
pochonin a	0.983254	0.8531	0.999998	1	0.992624	1	0.144684	0.999283	1	1	1	0.99919	1	1	0.994148
podocarpusflavone b	0.921542	0.030615	0.997929	1	1	1	0.356023	0.999286	1	1	1	0.997541	1	1	0.972337
pontacyl violet 6r	0.553765	0.060131	0.993962	1	1	1	0.286314	0.999286	1	1	1	1	1	1	0.849242
Potassium	0.079411	0.304503	0.002224	0	0	0	0.410139	0	0.017143	0	0	0.205344	0	0	0.09566
potassium-5-(4'-((2-(2-carboxylatocyclopent-1-enecarbonylimino)-5-ethyl-1,3,4-thiadiazol-3(2h)-yl)methyl)biphenyl-2-yl)tetrazol-1-ide	1	0.999831	0.999965	1	0.987073	1	0.740262	0.998439	1	1	1	0.999475	1	1	0.999813
pranazepide	1	0.951085	0.999844	1	0.999476	1	0.564821	0.999286	1	1	1	0.999033	1	1	0.999626
pranoprofen	0.012883	0.894923	0.009021	0	0.00122	0	0.49062	0	0	0	0	0.001633	0	0	0.007846
proadifen	0.987588	0.984249	0.999999	1	0.746603	1	0.904555	0.998594	1	1	1	0.999902	1	1	0.99583
protocatechuic acid	0.940947	1	9.9e-05	1	0.930826	1	0.551871	1	1	1	1	0.9	1	0	0.613682
prunetin	0.999987	0.999876	0.999962	1	0.999476	1	0.736882	0.999254	1	1	1	0.999543	1	1	0.999831
ps-1145	0.996119	0.918106	0.900588	1	0.5	0	0.494507	0.999286	0	0	0.5	0.598152	0	1	0.831619
ps-444035	0.992854	1	0.998986	1	0.989434	1	0.556601	1	1	1	1	1	1	1	0.99728
psammaplysene a	0.853292	0.967387	0.040273	0	0	0	0.554178	0	0	0	0.2	0.299476	0	1	0.39768
psammaplysene b	0.853292	0.967387	0.040273	0	0	0	0.554178	0	0	0	0.2	0.299476	0	1	0.39768
psb-0952	1	0.958584	0.99986	1	0.999476	1	0.605425	0.999286	1	1	1	0.999033	1	1	0.999631
psb-1011	1	0.958584	0.99986	1	0.999476	1	0.605425	0.999286	1	1	1	0.999033	1	1	0.999631
psb-10211	1	0.967017	0.999841	1	0.999476	1	0.649856	0.999286	1	1	1	0.999033	1	1	0.999624
psb-601	1	0.975659	0.999957	1	0.993885	1	0.625314	1	1	1	1	0.999134	1	1	0.999697
psilostachyin a	0.11457	0.999804	0.000434	0	0.033704	0	0.79768	0	0	0	0	0.00356	0	0	0.039521
psoralen	0.166942	0.873729	7.8e-05	0	0.00122	0	0.563651	0	0	0	0	0.003243	0	0	0.056754
ptr-3046	1	0.966666	0.999876	1	0.999476	1	0.643966	0.999286	1	1	1	0.999033	1	1	0.999636
pyridine-2,5-dicarboxylic acid	0.0165	0.787291	0.000676	0	0.00122	0	0.55963	0	0	0	0	0.005012	0	0	0.007396
pyripyropene a	0.996309	1	0.999484	1	0.989434	1	0.490665	1	1	1	1	1	1	1	0.998598
pyrogallol red	0.142025	0.607968	0.000226	0	0.001865	0	0.605346	0	0	0	0	0.000598	0	0	0.047616
pyrrolidine-1-carbonitrile	0.999235	0.438986	0.999995	1	1	1	0.468041	0.999286	1	1	1	0.995027	1	1	0.998086
quercetagetin	0.006933	0.08596	0.000728	0	0.506944	0.013889	0.343749	0.020408	0.017143	0	0	0.013508	0.013889	0	0.007056
quercetagetinidin	0.201789	0.100888	0.001143	0	0	0	0.135976	0	0	0	0	0.002044	0	0	0.068325
Quercetin	0.01952	0.233139	6.5e-05	0	0.078947	0	0.361358	0	0	0	0	0.003654	0	0	0.007746
quercitrin	0.124618	0.051852	0.859685	0	0.051587	0.013889	0.298824	0.020408	0.017143	0	0	0.410345	0.013889	0	0.464883
quinisocaine	0.987588	0.984249	0.999999	1	0.746603	1	0.904555	0.998594	1	1	1	0.999902	1	1	0.99583
Quisqualate	0.998553	0.425956	0.99999	1	1	1	0.469263	0.999286	1	1	1	0.995027	1	1	0.997857
r-10	0.987061	0.081311	0.969615	1	1	1	0.136223	0.999286	1	1	1	0.996794	1	1	0.98449
rad-140	0.284095	0.983829	0.325649	0	0.308284	0.001195	0.650323	0.002358	0.001195	0	0.1	0.503038	0.001195	1	0.370927
rad-35010	0.799438	0.999876	0.478896	0	0.757728	1	0.903423	0	1	1	0.6	0.799179	1	1	0.692504
Ramatroban	0.000727	0.647338	7.9e-05	0	0.00122	0	0.394909	0	0	0	0	0.003654	0	0	0.001486
Rambazole	0.000258	0.126312	0.00011	0	0.002994	0	0.203996	0	0	0	0	0.003654	0	0	0.001341
[truncated: 330 more rows]

## Sheet: Drugbank
Drug	KStar	NaiveBayes	MLP	IB1	Decorate	END	ThresholdSelector	JRip	PART	RandomTree	RandomForest	RotationForest	J48	SVM	Rejection_Score
'5'-O-(N-(L-Alanyl)-Sulfamoyl)Adenosine	0.998473	0.716878	0.999994	1	1	1	0.62727	0.999286	1	1	0.9	0.995262	1	1	0.99791
'5'-O-(N-(L-Prolyl)-Sulfamoyl)Adenosine	0.999148	0.831539	0.999988	1	0.912073	1	0.816852	1	1	1	1	0.997794	1	1	0.998977
({[(3E)-2'-OXO-2',7'-DIHYDRO-2,3'-BIINDOL-3(7H)-YLIDENE]AMINO}OXY)ACETIC ACID	0.996524	1	0.999568	1	0.984724	1	0.545622	0.999265	1	1	1	0.999127	1	1	0.998406
(1-HYDROXYDODECANE-1,1-DIYL)BIS(PHOSPHONIC ACID)	0.948356	1	0.999485	1	0.862348	1	0.673504	1	1	1	1	0.99881	1	1	0.982217
(1-HYDROXYHEPTANE-1,1-DIYL)BIS(PHOSPHONIC ACID)	0.948356	1	0.999485	1	0.862348	1	0.673504	1	1	1	1	0.99881	1	1	0.982217
(1-HYDROXYNONANE-1,1-DIYL)BIS(PHOSPHONIC ACID)	0.364388	0.101783	0.731516	0	1	1	0.316707	0.999286	1	1	1	0.201633	1	1	0.432512
(1-Methyl-1h-Imidazol-2-Yl)-(3-Methyl-4-{3-[(Pyridin-3-Ylmethyl)-Amino]-Propoxy}-Benzofuran-2-Yl)-Methanone	0.201789	0.100888	0.001143	0	0	0	0.135976	0	0	0	0	0.002044	0	0	0.068325
(1-Tert-Butyl-5-Hydroxy-1h-Pyrazol-4-Yl)-(6-Methanesulfonyl-4'-Methoxy-2-Methyl-Biphenyl-3-Yl)-Methanone	0.000285	0	0	0	0.170534	0	0	0	0	0	0	0.00011	0	0	0.000132
(1'r,2's)-9-(2-Hydroxy-3'-Keto-Cyclopenten-1-Yl)Adenine	0.967943	0.621399	0.999998	1	1	1	0.424891	0.999286	1	1	0.4	0.995027	1	1	0.987656
(10ALPHA,13ALPHA,14BETA,17ALPHA)-17-HYDROXYANDROST-4-EN-3-ONE	0.905185	0.026104	0.997963	1	1	1	0.380321	0.999286	1	1	1	0.997541	1	1	0.966896
(10R)-10-methyl-3-(6-methylpyridin-3-yl)-9,10,11,12-tetrahydro-8H-[1,4]diazepino[5',6':4,5]thieno[3,2-f]quinolin-8-one	0.994767	0.904991	0.902248	1	0.999476	1	0.488925	0.999286	1	1	1	0.3803	1	1	0.759105
(11-BETA)-11,21-DIHYDROXY-PREGN-4-ENE-3,20-DIONE	0.133972	0.69222	0.000799	0	0.001865	0	0.690591	0	0	0	0	0.003293	0	0	0.046021
(11E)-OCTADEC-11-ENOIC ACID	0.005726	0.102552	0.001566	0	0.002994	0	0.137391	0	0	0	0	0.003243	0	0	0.003512
(11S)-8-CHLORO-11-[1-(METHYLSULFONYL)PIPERIDIN-4-YL]-6-PIPERAZIN-1-YL-11H-BENZO[5,6]CYCLOHEPTA[1,2-B]PYRIDINE	0.150595	0.995069	0.999214	0	0.633119	1	0.564667	1	1	1	0.9	0.304118	1	1	0.484642
(13R,15S)-13-METHYL-16-OXA-8,9,12,22,24-PENTAAZAHEXACYCLO[15.6.2.16,9.1,12,15.0,2,7.0,21,25]HEPTACOSA-1(24),2,4,6,17(25),18,20-HEPTAENE-23,26-DIONE	0.999975	0.934425	0.998387	1	0.999476	1	0.566291	0.999286	1	1	1	0.999033	1	1	0.999132
(16ALPHA,17ALPHA)-ESTRA-1,3,5(10)-TRIENE-3,16,17-TRIOL	0.03079	0.747224	0.999982	0	0.00122	0	0.385424	0	0	0	0	0.1	0	1	0.376924
(17beta)-17-(cyanomethyl)-2-methoxyestra-1(10),2,4-trien-3-yl sulfamate	0.97162	0.080163	0.999639	1	1	1	0.124021	0.999286	1	1	1	0.996794	1	1	0.989351
(1aR,8S,13S,14S,15aR)-5,13,14-trihydroxy-3-methoxy-8-methyl-8,9,13,14,15,15a-hexahydro-6H-oxireno[k][2]benzoxacyclotetradecine-6,12(1aH)-dione	0.977572	0.86324	0.839308	1	0.697016	1	0.489154	1	1	1	1	0.899906	1	1	0.905595
(1E)-5-(1-piperidin-4-yl-3-pyridin-4-yl-1H-pyrazol-4-yl)-2,3-dihydro-1H-inden-1-one oxime	0.999999	0.964064	0.998883	1	0.999476	1	0.654416	0.999286	1	1	1	0.999033	1	1	0.999305
(1n)-4-N-Butoxyphenylsulfonyl-(2r)-N-Hydroxycarboxamido-(4s)-Methanesulfonylamino-Pyrrolidine	0.999569	0.970649	0.99988	1	0.971491	1	0.473354	0.999123	0.991379	1	1	0.995953	1	1	0.998467
(1R,2R,3R,4S,5R)-4-(BENZYLAMINO)-5-(METHYLTHIO)CYCLOPENTANE-1,2,3-TRIOL	0.391625	0	7e-06	0	0.296685	1	0	0	0	1	0.8	0.400335	1	0	0.263989
(1R,2R)-N-(2-AMINOETHYL)-2-{[(4-METHOXYPHENYL)SULFONYL]METHYL}CYCLOHEXANECARBOXAMIDE	0.999957	0.876216	0.999814	1	0.931818	1	0.547572	0.997706	1	1	1	0.994444	1	1	0.998072
(1R,3R)-5-[(2E)-3-{(1S,3R)-2,2,3-trimethyl-3-[6,6,6-trifluoro-5-hydroxy-5-(trifluoromethyl)hex-3-yn-1-yl]cyclopentyl}prop-2-en-1-ylidene]cyclohexane-1,3-diol	0.087077	0.514394	0.000148	0	0.00122	0	0.323756	0	0	0	0	0.103654	0	0	0.063626
(1R)-1-{[(4'-METHOXY-1,1'-BIPHENYL-4-YL)SULFONYL]AMINO}-2-METHYLPROPYLPHOSPHONIC ACID	0.999717	0.399433	0.999726	1	1	1	0.458535	0.999286	1	1	1	0.994331	1	1	0.997925
(1R)-1,2,2-TRIMETHYLPROPYL (R)-METHYLPHOSPHINATE	0.062653	0.107037	0.000331	0	0.051587	0.013889	0.146688	0.020408	0.017143	0	0	0.012683	0.013889	0	0.025222
(1R)-1,2,2-TRIMETHYLPROPYL (S)-METHYLPHOSPHINATE	0.997365	0.375522	0.998594	1	1	1	0.445619	0.999286	1	1	1	0.993723	1	1	0.996561
(1R)-2-[(CYANOMETHYL)AMINO]-1-({[2-(DIFLUOROMETHOXY)BENZYL]SULFONYL}METHYL)-2-OXOETHYL MORPHOLINE-4-CARBOXYLATE	0.999933	0.986804	0.999663	1	0.987796	1	0.615775	0.999274	1	1	1	0.998567	1	1	0.999388
(1R)-2-{[AMINO(IMINO)METHYL]AMINO}-1-{4-[(4R)-4-(HYDROXYMETHYL)-1,3,2-DIOXABOROLAN-2-YL]PHENYL}ETHYL NICOTINATE	0.022039	0.775314	0.000794	0	0.001865	0	0.684236	0	0	0	0	0.003293	0	0	0.008709
(1R)-2-amino-1-[3-(trifluoromethyl)phenyl]ethanol	0.970313	0.202819	0.999998	1	1	1	0.060218	0.999286	1	1	1	0.995176	1	1	0.988496
(1R)-2-METHYL-1-(PHENYLMETHYL)PROPYL[(1S)-1-FORMYLPENTYL]CARBAMATE	0.999957	0.876216	0.999814	1	0.931818	1	0.547572	0.997706	1	1	1	0.994444	1	1	0.998072
(1R)-MENTHYL HEXYL PHOSPHONATE GROUP	0.999576	0.980104	0.996437	1	0.98366	1	0.66794	0.998521	1	1	1	0.996796	1	1	0.997603
(1R)-N,6-DIHYDROXY-7-METHOXY-2-[(4-METHOXYPHENYL)SULFONYL]-1,2,3,4-TETRAHYDROISOQUINOLINE-1-CARBOXAMIDE	0.920737	0.080306	0.999325	1	1	1	0.118172	0.999286	1	1	1	0.576749	1	1	0.832271
(1S,2R,5S)-5-[3-(TRIFLUOROMETHYL)-5,6-DIHYDRO[1,2,4]TRIAZOLO[4,3-A]PYRAZIN-7(8H)-YL]-2-(2,4,5-TRIFLUOROPHENYL)CYCLOHEXANAMINE	0.997123	0.813994	0.999671	1	0.930433	1	0.668199	0.999292	1	1	1	0.681909	1	1	0.892901
(1S,2S,3R,4S,5S)-2,3,4-TRIHYDROXY-5-(HYDROXYMETHYL)CYCLOHEXYL (1E)-2-PHENYL-N-(SULFOOXY)ETHANIMIDOTHIOATE	0.680447	0.04891	0.997011	1	1	1	0.30899	0.999286	1	1	1	0.997541	1	1	0.891666
(1S,2S,3R,6R)-4-(hydroxymethyl)-6-(octylamino)cyclohex-4-ene-1,2,3-triol	0.680447	0.04891	0.997011	1	1	1	0.30899	0.999286	1	1	1	0.997541	1	1	0.891666
(1S,2S,5S)2-(4-GLUTARIDYLBENZYL)-5-PHENYL-1-CYCLOHEXANOL	0.161423	0.999867	0.045223	0	0.128872	0	0.604391	0	0.045455	0	0	0.079435	0	0	0.09536
(1S,3R,4S,5S,7S)-4-{[2-(4-METHOXYPHENOXY)-2-METHYLPROPANOYL]AMINO}ADAMANTANE-1-CARBOXAMIDE	0.045684	0.654573	0.000338	0	0.481132	0	0.647987	0	0.017143	0	0	0	0	0	0.015341
(1S,3R,6S)-4-oxo-6-{4-[(2-phenylquinolin-4-yl)methoxy]phenyl}-5-azaspiro[2.4]heptane-1-carboxylic acid	0.814271	0.931928	0.023835	0	0.5	0	0.562091	0.999286	0	0	0	0.401996	0	1	0.413367
(1S,3S,5S)-2-{(2S)-2-amino-2-[(1R,3S,5R,7S)-3-hydroxytricyclo[3.3.1.1~3,7~]dec-1-yl]acetyl}-2-azabicyclo[3.1.0]hexane-3-carbonitrile	0.997123	0.813994	0.999671	1	0.930433	1	0.668199	0.999292	1	1	1	0.681909	1	1	0.892901
(1S,4R,9S)-5-(trifluoromethyl)-1,2,3,4-tetrahydro-1,4-methanonaphthalen-9-amine	0.970313	0.202819	0.999998	1	1	1	0.060218	0.999286	1	1	1	0.995176	1	1	0.988496
(1S,5S,7R)-N~7~-(BIPHENYL-4-YLMETHYL)-N~3~-HYDROXY-6,8-DIOXA-3-AZABICYCLO[3.2.1]OCTANE-3,7-DICARBOXAMIDE	0.999257	0.982467	0.999913	1	0.925015	1	0.687393	0.999177	1	1	1	0.99448	1	1	0.997884
(1S,6BR,9AS,11R,11BR)-9A,11B-DIMETHYL-1-[(METHYLOXY)METHYL]-3,6,9-TRIOXO-1,6,6B,7,8,9,9A,10,11,11B-DECAHYDRO-3H-FURO[4,3,2-DE]INDENO[4,5-H][2]BENZOPYRAN-11-YL ACETATE	0.085357	0.530116	0.00498	0	0.00122	0	0.436983	0	0	0	0	0.000466	0	0	0.030268
(1S,6R)-3-{[3-(TRIFLUOROMETHYL)-5,6-DIHYDRO[1,2,4]TRIAZOLO[4,3-A]PYRAZIN-7(8H)-YL]CARBONYL}-6-(2,4,5-TRIFLUOROPHENYL)CYCLOHEX-3-EN-1-AMINE	0.997123	0.813994	0.999671	1	0.930433	1	0.668199	0.999292	1	1	1	0.681909	1	1	0.892901
(1S,7S,8S,8AR)-1,2,3,7,8,8A-HEXAHYDRO-7-METHYL-8-[2-[(2R,4R)-TETRAHYDRO-4-HY DROXY-6-OXO-2H-PYRAN-2-YL]ETHYL]-1-NAPHTHALENOL	0.904577	0.224973	0.997794	0	1	1	0.339773	0.999286	1	1	0.7	0.11076	1	1	0.671044
(1S)-1-(1H-INDOL-3-YLMETHYL)-2-(2-PYRIDIN-4-YL-[1,7]NAPHTYRIDIN-5-YLOXY)-EHYLAMINE	0.00733	0.104497	0.00248	0	0.026944	0.013889	0.398379	0.020408	0.017143	0	0	0.012804	0.013889	0	0.007538
(1S)-1-(3-chlorophenyl)-2-oxo-2-[(1,3,4-trioxo-1,2,3,4-tetrahydroisoquinolin-5-yl)amino]ethyl acetate	0.982071	0.88706	0.999474	1	0.989434	1	0.160774	1	1	1	1	0.999573	1	1	0.993706
(1s)-1-(9-Deazaadenin-9-Yl)-1,4,5-Trideoxy-1,4-Imino-5-Methylthio-D-Ribitol	0.201789	0.100888	0.001143	0	0	0	0.135976	0	0	0	0	0.002044	0	0	0.068325
(1S)-1-{[(4'-METHOXY-1,1'-BIPHENYL-4-YL)SULFONYL]AMINO}-2-METHYLPROPYLPHOSPHONIC ACID	0.999717	0.399433	0.999726	1	1	1	0.458535	0.999286	1	1	1	0.994331	1	1	0.997925
(1S)-1-CYCLOPROPYL-2-[(2S)-4-(2,5-DIFLUOROPHENYL)-2-PHENYL-2,5-DIHYDRO-1H-PYRROL-1-YL]-2-OXOETHANAMINE	0.999993	0.948907	0.997491	1	0.5	0	0.484505	0.999286	0	0	0.5	0.899033	0	1	0.965506
(1S)-1,2,3,4-TETRAHYDRO-BENZO[C]PHENANTHRENE-2,3,4-TRIOL	0.995758	1	0.999484	1	0.989434	1	0.525502	1	1	1	1	1	1	1	0.998414
(1S)-2-(1H-INDOL-3-YL)-1-[({5-[(E)-2-PYRIDIN-4-YLVINYL]PYRIDIN-3-YL}OXY)METHYL]ETHYLAMINE	0.00733	0.104497	0.00248	0	0.026944	0.013889	0.398379	0.020408	0.017143	0	0	0.012804	0.013889	0	0.007538
(1S)-2-(1H-INDOL-3-YL)-1-{[(5-ISOQUINOLIN-6-YLPYRIDIN-3-YL)OXY]METHYL}ETHYLAMINE	0.00733	0.104497	0.00248	0	0.026944	0.013889	0.398379	0.020408	0.017143	0	0	0.012804	0.013889	0	0.007538
(1S)-2-[(2S,5R)-2-(AMINOMETHYL)-5-ETHYNYLPYRROLIDIN-1-YL]-1-CYCLOPENTYL-2-OXOETHANAMINE	0.997123	0.813994	0.999671	1	0.930433	1	0.668199	0.999292	1	1	1	0.681909	1	1	0.892901
(1S)-2-[(2S,5R)-2-(AMINOMETHYL)-5-PROP-1-YN-1-YLPYRROLIDIN-1-YL]-1-CYCLOPENTYL-2-OXOETHANAMINE	0.997123	0.813994	0.999671	1	0.930433	1	0.668199	0.999292	1	1	1	0.681909	1	1	0.892901
(1S)-2-oxo-1-phenyl-2-[(1,3,4-trioxo-1,2,3,4-tetrahydroisoquinolin-5-yl)amino]ethyl acetate	0.986005	0.082411	0.999984	1	1	1	0.116636	0.999286	1	1	1	0.996794	1	1	0.994261
(1S)-MENTHYL HEXYL PHOSPHONATE GROUP	0.999576	0.980104	0.996437	1	0.98366	1	0.66794	0.998521	1	1	1	0.996796	1	1	0.997603
(1Z)-4-(4-FLUOROPHENYL)-2-METHYLIDENEBUTAN-1-IMINE	0.927462	0.143859	0.999998	1	1	1	0.169548	0.999286	1	1	1	0.897851	1	1	0.941771
(2-{[(4-BROMO-2-FLUOROBENZYL)AMINO]CARBONYL}-5-CHLOROPHENOXY)ACETIC ACID	0.905185	0.026104	0.997963	1	1	1	0.380321	0.999286	1	1	1	0.997541	1	1	0.966896
(2-AMINO-3-PHENYL-BICYCLO[2.2.1]HEPT-2-YL)-PHENYL-METHANONE	0.247295	0.769429	0.000296	0	0.001865	0	0.520945	0	0	0	0	0.000598	0	0	0.082729
(2-BROMOETHYL)(2-'FORMYL-4'-AMINOPHENYL) ACETATE	0.119991	0.438468	9.1e-05	0	0.00122	0	0.37844	0	0	0	0	0.003654	0	0	0.041245
(2-CARBAMOYLMETHYL-5-PROPYL-OCTAHYDRO-INDOL-7-YL)ACETIC ACID	0.896026	0.03229	0.997908	1	1	1	0.35027	0.999286	1	1	1	0.997541	1	1	0.963825
(2,2-DIPHOSPHONOETHYL)(DODECYL)DIMETHYLPHOSPHONIUM	0.364388	0.101783	0.731516	0	1	1	0.316707	0.999286	1	1	1	0.201633	1	1	0.432512
(20S)-19,20,21,22-TETRAHYDRO-19-OXO-5H-18,20-ETHANO-12,14-ETHENO-6,10-METHENO-18H-BENZ[D]IMIDAZO[4,3-K][1,6,9,12]OXATRIAZA-CYCLOOCTADECOSINE-9-CARBONITRILE	0.024538	0.107853	7.4e-05	0	0.051587	0.013889	0.375641	0.020408	0.017143	0	0	0.0021	0.013889	0	0.008904
(20S)-19,20,22,23-TETRAHYDRO-19-OXO-5H,21H-18,20-ETHANO-12,14-ETHENO-6,10-METHENOBENZ[D]IMIDAZO[4,3-L][1,6,9,13]OXATRIAZACYCLONOADECOSINE-9-CARBONITRILE	0.024538	0.107853	7.4e-05	0	0.051587	0.013889	0.375641	0.020408	0.017143	0	0	0.0021	0.013889	0	0.008904
(21S)-1AZA-4,4-DIMETHYL-6,19-DIOXA-2,3,7,20-TETRAOXOBICYCLO[19.4.0] PENTACOSANE	0.576209	0.150436	0.999998	0	1	1	0.179928	0.999286	1	1	0.9	0.896858	1	1	0.824355
(2e,3s)-3-Hydroxy-5'-[(4-Hydroxypiperidin-1-Yl)Sulfonyl]-3-Methyl-1,3-Dihydro-2,3'-Biindol-2'(1'h)-One	0.999419	0.915219	0.996361	1	0.966712	1	0.548806	1	1	1	1	0.999213	1	1	0.998331
(2E,4E)-11-METHOXY-3,7,11-TRIMETHYLDODECA-2,4-DIENOIC ACID	0.018134	0.921549	0.000294	0	0.00122	0	0.559166	0	0	0	0	0.10115	0	0	0.039859
(2E)-1-[(6-chloropyridin-3-yl)methyl]-N-nitroimidazolidin-2-imine	0.002963	0.009091	0.000119	0	0.002955	0	0.00844	0	0	0	0	0.00077	0	0	0.001284
(2E)-1-[2-hydroxy-4-methoxy-5-(3-methylbut-2-en-1-yl)phenyl]-3-(4-hydroxyphenyl)prop-2-en-1-one	0.896026	0.03229	0.997908	1	1	1	0.35027	0.999286	1	1	1	0.997541	1	1	0.963825
(2E)-3-(2-OCT-1-YN-1-YLPHENYL)ACRYLIC ACID	0.982527	0.077578	0.999997	1	1	1	0.089285	0.999286	1	1	1	0.996794	1	1	0.993106
(2E)-3-(3,4-DIHYDROXYPHENYL)-2-IMINOPROPANOIC ACID	0.201789	0.100888	0.001143	0	0	0	0.135976	0	0	0	0	0.002044	0	0	0.068325
(2E)-N-{4-[(3-bromophenyl)amino]quinazolin-6-yl}-4-(dimethylamino)but-2-enamide	1	0.99994	0.999951	1	0.974114	1	0.751788	0.999246	1	1	1	0.999795	1	1	0.999915
(2E)-N-hydroxy-3-[1-methyl-4-(phenylacetyl)-1H-pyrrol-2-yl]prop-2-enamide	0.975515	0.080398	0.999998	1	1	1	0.083629	0.999286	1	1	1	0.996794	1	1	0.990769
(2R,3R,4S,5R)-2-[6-amino-8-[(3,4-dichlorophenyl)methylamino]purin-9-yl]-5-(hydroxymethyl)oxolane-3,4-diol	0.875725	0.144344	0.999998	1	1	1	0.168972	0.999286	1	1	1	0.897851	1	1	0.924525
(2r,3r,4s,5r)-2-Acetamido-3,4-Dihydroxy-5-Hydroxymethyl-Piperidinium	0.329465	0.075549	0.604806	1	1	1	0.202777	0.999286	1	1	0.7	0.401565	1	1	0.445279
(2R,3R,4S)-3-(4-HYDROXYPHENYL)-4-METHYL-2-[4-(2-PYRROLIDIN-1-YLETHOXY)PHENYL]CHROMAN-6-OL	1	0.999993	0.999727	1	0.805348	1	0.999677	0.999186	1	1	1	0.99905	1	1	0.999592
(2R,3R)-7-(methylsulfonyl)-3-(2,4,5-trifluorophenyl)-1,2,3,4-tetrahydropyrido[1,2-a]benzimidazol-2-amine	0.997123	0.813994	0.999671	1	0.930433	1	0.668199	0.999292	1	1	1	0.681909	1	1	0.892901
(2R,3R)-N^1^-[(1S)-2,2-DIMETHYL-1-(METHYLCARBAMOYL)PROPYL]-N^4^-HYDROXY-2-(2-METHYLPROPYL)-3-{[(1,3-THIAZOL-2-YLCARBONYL)AMINO]METHYL}BUTANEDIAMIDE	0.205315	0.957245	0.001419	0	0.5	0	0.651009	0	0	0	0	0.202759	0	0	0.136498
(2R,4R)-N~1~-(4-CHLOROPHENYL)-N~2~-[2-FLUORO-4-(2-OXOPYRIDIN-1(2H)-YL)PHENYL]-4-METHOXYPYRROLIDINE-1,2-DICARBOXAMIDE	0.249213	0.999923	0.857302	0	0	0	0.836645	0	0	0	0	0.10441	0	1	0.403642
(2R,6S)-6-{[methyl(3,4,5-trimethoxyphenyl)amino]methyl}-1,2,5,6,7,8-hexahydroquinazoline-2,4-diamine	0.991799	1	1	1	0.972677	0.995074	0.194858	0.999284	0.995074	1	1	1	0.995074	1	0.997266
(2R)-({4-[AMINO(IMINO)METHYL]PHENYL}AMINO){5-ETHOXY-2-FLUORO-3-[(3R)-TETRAHYDROFURAN-3-YLOXY]PHENYL}ACETICACID	0.184204	0.962288	0.001503	0	0.00122	0	0.687901	0.999286	0	0	0	0.001616	0	0	0.062441
(2R)-1-(2,6-dimethylphenoxy)propan-2-amine	0.026626	0.939436	0.00011	0	0.00122	0	0.635348	0	0	0	0	0.001616	0	0	0.00945
(2R)-1-(DIMETHYLAMINO)-3-{4-[(6-{[2-FLUORO-5-(TRIFLUOROMETHYL)PHENYL]AMINO}PYRIMIDIN-4-YL)AMINO]PHENOXY}PROPAN-2-OL	0.999975	0.934425	0.998387	1	0.999476	1	0.566291	0.999286	1	1	1	0.999033	1	1	0.999132
(2R)-1-[(4-tert-butylphenyl)sulfonyl]-2-methyl-4-(4-nitrophenyl)piperazine	0.045684	0.654573	0.000338	0	0.481132	0	0.647987	0	0.017143	0	0	0	0	0	0.015341
(2R)-1-[(5,6-DIPHENYL-7H-PYRROLO[2,3-D]PYRIMIDIN-4-YL)AMINO]PROPAN-2-OL	0.997503	0.895755	0.972235	1	0.966712	1	0.531624	1	1	1	1	0.999213	1	1	0.98965
(2R)-1-[4-({4-[(2,5-DICHLOROPHENYL)AMINO]PYRIMIDIN-2-YL}AMINO)PHENOXY]-3-(DIMETHYLAMINO)PROPAN-2-OL	0.999975	0.934425	0.998387	1	0.999476	1	0.566291	0.999286	1	1	1	0.999033	1	1	0.999132
(2R)-1-[4-({6-[(2,6-DIFLUOROPHENYL)AMINO]PYRIMIDIN-4-YL}AMINO)PHENOXY]-3-(DIMETHYLAMINO)PROPAN-2-OL	0.999975	0.934425	0.998387	1	0.999476	1	0.566291	0.999286	1	1	1	0.999033	1	1	0.999132
(2R)-1-{4-[(4-ANILINO-5-BROMOPYRIMIDIN-2-YL)AMINO]PHENOXY}-3-(DIMETHYLAMINO)PROPAN-2-OL	0.999975	0.934425	0.998387	1	0.999476	1	0.566291	0.999286	1	1	1	0.999033	1	1	0.999132
(2R)-2-({9-(1-methylethyl)-6-[(4-pyridin-2-ylbenzyl)amino]-9H-purin-2-yl}amino)butan-1-ol	0.013396	0.687792	9.2e-05	0	0.00122	0	0.499805	0	0	0	0	0.0021	0	0	0.005196
(2R)-2-(4-CHLOROPHENYL)-2-[4-(1H-PYRAZOL-4-YL)PHENYL]ETHANAMINE	0.00733	0.104497	0.00248	0	0.026944	0.013889	0.398379	0.020408	0.017143	0	0	0.012804	0.013889	0	0.007538
(2R)-2-(4-CHLOROPHENYL)-2-PHENYLETHANAMINE	0.002209	0	6e-06	0	0.122552	0	0	0	0	0	0	0.00077	0	0	0.000995
(2R)-2-(5-CHLORO-2-THIENYL)-N-{(3S)-1-[(1S)-1-METHYL-2-MORPHOLIN-4-YL-2-OXOETHYL]-2-OXOPYRROLIDIN-3-YL}PROPENE-1-SULFONAMIDE	0.050136	0.953734	0.00023	0	0.00122	0	0.66938	0	0	0	0	0.001616	0	0	0.017327
(2R)-2-(7-carbamoyl-1H-benzimidazol-2-yl)-2-methylpyrrolidinium	0.996924	0.428	0.999997	1	1	1	0.433478	0.999286	1	1	1	0.995027	1	1	0.997316
(2R)-2-{[4-(benzylamino)-8-(1-methylethyl)pyrazolo[1,5-a][1,3,5]triazin-2-yl]amino}butan-1-ol	0.013396	0.687792	9.2e-05	0	0.00122	0	0.499805	0	0	0	0	0.0021	0	0	0.005196
(2R)-2-AMINO-3,3,3-TRIFLUORO-N-HYDROXY-2-{[(4-PHENOXYPHENYL)SULFONYL]METHYL}PROPANAMIDE	0.998754	0.563644	0.999264	1	0.571429	1	0.502312	0.999286	1	1	1	0.988148	1	1	0.995389
(2R)-2-benzyl-3-nitropropanoic acid	0.998697	0.364762	0.999907	1	1	1	0.444294	0.999286	1	1	1	0.995551	1	1	0.998052
(2R)-3-{[(4Z)-5,6-DIPHENYL-6,7-DIHYDRO-4H-PYRROLO[2,3-D]PYRIMIDIN-4-YLIDENE]AMINO}PROPANE-1,2-DIOL	0.997503	0.895755	0.972235	1	0.966712	1	0.531624	1	1	1	1	0.999213	1	1	0.98965
(2R)-3-{[(BENZYLAMINO)CARBONYL]AMINO}-2-HYDROXYPROPANOIC ACID	0.119991	0.438468	9.1e-05	0	0.00122	0	0.37844	0	0	0	0	0.003654	0	0	0.041245
(2R)-3-{[{[(2S)-2,3-DIHYDROXYPROPYL]OXY}(HYDROXY)PHOSPHORYL]OXY}-2-[(9E)-HEXADEC-9-ENOYLOXY]PROPYL (9E)-OCTADEC-9-ENOATE	0.006867	0.360357	0.000724	0	0.001865	0	0.642066	0	0	0	0	0.000598	0	0	0.002729
(2R)-4-(2-BENZOYL-1,2-DIAZEPAN-1-YL)-4-OXO-1-(2,4,5-TRIFLUOROPHENYL)BUTAN-2-AMINE	0.997123	0.813994	0.999671	1	0.930433	1	0.668199	0.999292	1	1	1	0.681909	1	1	0.892901
(2R)-4-[(8R)-8-METHYL-2-(TRIFLUOROMETHYL)-5,6-DIHYDRO[1,2,4]TRIAZOLO[1,5-A]PYRAZIN-7(8H)-YL]-4-OXO-1-(2,4,5-TRIFLUOROPHENYL)BUTAN-2-AMINE	0.997123	0.813994	0.999671	1	0.930433	1	0.668199	0.999292	1	1	1	0.681909	1	1	0.892901
(2R)-4,4-dihydroxy-5-nitro-2-(phenylmethyl)pentanoic acid	0.998697	0.364762	0.999907	1	1	1	0.444294	0.999286	1	1	1	0.995551	1	1	0.998052
(2R)-N-[(2R)-2-(DIHYDROXYBORYL)-1-L-PROLYLPYRROLIDIN-2-YL]-N-[(5R)-5-(DIHYDROXYBORYL)-1-L-PROLYLPYRROLIDIN-2-YL]-L-PROLINAMIDE	0.997123	0.813994	0.999671	1	0.930433	1	0.668199	0.999292	1	1	1	0.681909	1	1	0.892901
(2r)-N-[4-Cyano-3-(Trifluoromethyl)Phenyl]-3-[(4-Fluorophenyl)Sulfonyl]-2-Hydroxy-2-Methylpropanamide	0.799438	0.999876	0.478896	0	0.757728	1	0.903423	0	1	1	0.6	0.799179	1	1	0.692504
(2R)-N-HYDROXY-2-[(3S)-3-METHYL-3-{4-[(2-METHYLQUINOLIN-4-YL)METHOXY]PHENYL}-2-OXOPYRROLIDIN-1-YL]PROPANAMIDE	0.814271	0.931928	0.023835	0	0.5	0	0.562091	0.999286	0	0	0	0.401996	0	1	0.413367
(2R)-N~4~-hydroxy-2-(3-hydroxybenzyl)-N~1~-[(1S,2R)-2-hydroxy-2,3-dihydro-1H-inden-1-yl]butanediamide	0.320202	0.904865	0.000492	0	0.00122	0	0.490976	0	0	0	0	0.103243	0	1	0.141313
(2S,3R)-3-(6-amino-9H-purin-9-yl)nonan-2-ol	0.239134	0.999998	0.000265	1	0.98	1	0.612464	0.066667	0.111111	1	0.8	0.6	1	0	0.2798
(2s,3r)-3-Amino-2-Hydroxy-5-(Ethylsulfanyl)Pentanoyl-((S)-(-)-(1-Naphthyl)Ethyl)Amide	0.867287	0.03422	0.997868	1	1	1	0.340882	0.999286	1	1	1	0.997541	1	1	0.954232
(2S,3S,4E,6E,8S,9S)-3-amino-9-methoxy-2,6,8-trimethyl-10-phenyldeca-4,6-dienoic acid	0.947256	0.129442	0.999997	1	1	1	0.19751	0.999286	1	1	1	0.797851	1	1	0.915035
(2S,3S)-3-{3-[2-chloro-4-(methylsulfonyl)phenyl]-1,2,4-oxadiazol-5-yl}-1-cyclopentylidene-4-cyclopropyl-1-fluorobutan-2-amine	0.997123	0.813994	0.999671	1	0.930433	1	0.668199	0.999292	1	1	1	0.681909	1	1	0.892901
(2S,3S)-3-{3-[4-(METHYLSULFONYL)PHENYL]-1,2,4-OXADIAZOL-5-YL}-1-OXO-1-PYRROLIDIN-1-YLBUTAN-2-AMINE	0.997123	0.813994	0.999671	1	0.930433	1	0.668199	0.999292	1	1	1	0.681909	1	1	0.892901
(2S,3S)-3-AMINO-4-(3,3-DIFLUOROPYRROLIDIN-1-YL)-N,N-DIMETHYL-4-OXO-2-(TRANS-4-[1,2,4]TRIAZOLO[1,5-A]PYRIDIN-6-YLCYCLOHEXYL)BUTANAMIDE	0.997123	0.813994	0.999671	1	0.930433	1	0.668199	0.999292	1	1	1	0.681909	1	1	0.892901
(2S,3S)-3-AMINO-4-[(3S)-3-FLUOROPYRROLIDIN-1-YL]-N,N-DIMETHYL-4-OXO-2-(TRANS-4-[1,2,4]TRIAZOLO[1,5-A]PYRIDIN-5-YLCYCLOHEXYL)BUTANAMIDE	0.997123	0.813994	0.999671	1	0.930433	1	0.668199	0.999292	1	1	1	0.681909	1	1	0.892901
(2S,3S)-3-FORMYL-2-({[(4-METHYLPHENYL)SULFONYL]AMINO}METHYL)PENTANOIC ACID	0.119991	0.438468	9.1e-05	0	0.00122	0	0.37844	0	0	0	0	0.003654	0	0	0.041245
(2S,3S)-3-FORMYL-2-({[(4-NITROPHENYL)SULFONYL]AMINO}METHYL)PENTANOIC ACID	0.119991	0.438468	9.1e-05	0	0.00122	0	0.37844	0	0	0	0	0.003654	0	0	0.041245
(2S,3S)-4-cyclopropyl-3-{(3R,5R)-3-[2-fluoro-4-(methylsulfonyl)phenyl]-1,2,4-oxadiazolidin-5-yl}-1-[(3S)-3-fluoropyrrolidin-1-yl]-1-oxobutan-2-amine	0.997123	0.813994	0.999671	1	0.930433	1	0.668199	0.999292	1	1	1	0.681909	1	1	0.892901
(2s,4r)-1-Acetyl-N-[(1s)-4-[(Aminoiminomethyl)Amino]-1-(2-Benzothiazolylcarbonyl)Butyl]-4-Hydroxy-2-Pyrrolidinecarboxamide	0.064259	0.326457	8.4e-05	0	0.00122	0	0.294827	0	0	0	0	0.003654	0	0	0.022665
(2S,5R,8S,11R,12S,15S,18S,19S,E)-8-ISOBUTYL-18-((5S,6S)-6-METHOXY-3,5-DIMETHYL-7-PHENYLHEPTYL)-1,2,5,12,15,19-HEXAMETHYL-3,6,9,13,16,20,25-HEPTAOXO-1,4,7,10,14,17,21-HEPTAAZACYCLOPENTACOS-21-ENE-11,22-DICARBOXYLIC ACID	0.984279	0.954384	0.998318	1	0.976471	0.996885	0.157779	1	0.996885	1	1	0.997049	0.996885	1	0.993215
(2S) N-ACETYL-L-ALANYL-ALPHAL-PHENYLALANYL-CHLOROETHYLKETONE	0.119991	0.438468	9.1e-05	0	0.00122	0	0.37844	0	0	0	0	0.003654	0	0	0.041245
(2S)-1-(1H-INDOL-3-YL)-3-{[5-(3-METHYL-1H-INDAZOL-5-YL)PYRIDIN-3-YL]OXY}PROPAN-2-AMINE	0.042871	0.45472	0.000249	0	0.05	0	0.473438	0	0	0	0	0.008726	0	0	0.017282
(2S)-1-(2,5-dimethylphenoxy)-3-morpholin-4-ylpropan-2-ol	0.921542	0.030615	0.997929	1	1	1	0.356023	0.999286	1	1	1	0.997541	1	1	0.972337
(2S)-1-(6H-INDOL-3-YL)-3-{[5-(7H-PYRAZOLO[3,4-C]PYRIDIN-5-YL)PYRIDIN-3-YL]OXY}PROPAN-2-AMINE	0.999967	0.941131	0.998289	1	0.999476	1	0.587654	0.999286	1	1	1	0.999033	1	1	0.999096
(2S)-1-(9H-Carbazol-4-yloxy)-3-(isopropylamino)propan-2-ol	1	0.999926	0.998303	1	0.972684	1	0.59588	0.999237	1	1	1	0.999364	1	1	0.999222
(2S)-1-[4-({4-[(2,5-DICHLOROPHENYL)AMINO]PYRIMIDIN-2-YL}AMINO)PHENOXY]-3-(DIMETHYLAMINO)PROPAN-2-OL	0.999975	0.934425	0.998387	1	0.999476	1	0.566291	0.999286	1	1	1	0.999033	1	1	0.999132
(2S)-1-[4-({6-[(2,6-DIFLUOROPHENYL)AMINO]PYRIMIDIN-4-YL}AMINO)PHENOXY]-3-(DIMETHYLAMINO)PROPAN-2-OL	0.999975	0.934425	0.998387	1	0.999476	1	0.566291	0.999286	1	1	1	0.999033	1	1	0.999132
(2S)-1-{[5-(1H-INDAZOL-5-YL)PYRIDIN-3-YL]OXY}-3-[(7AS)-7AH-INDOL-3-YL]PROPAN-2-AMINE	0.999967	0.941131	0.998289	1	0.999476	1	0.587654	0.999286	1	1	1	0.999033	1	1	0.999096
(2S)-1-{[5-(3-METHYL-1H-INDAZOL-5-YL)PYRIDIN-3-YL]OXY}-3-PHENYLPROPAN-2-AMINE	0.00733	0.104497	0.00248	0	0.026944	0.013889	0.398379	0.020408	0.017143	0	0	0.012804	0.013889	0	0.007538
(2S)-1-{4-[(4-ANILINO-5-BROMOPYRIMIDIN-2-YL)AMINO]PHENOXY}-3-(DIMETHYLAMINO)PROPAN-2-OL	0.999975	0.934425	0.998387	1	0.999476	1	0.566291	0.999286	1	1	1	0.999033	1	1	0.999132
(2S)-1-AMINO-3-[(5-NITROQUINOLIN-8-YL)AMINO]PROPAN-2-OL	0.997503	0.895755	0.972235	1	0.966712	1	0.531624	1	1	1	1	0.999213	1	1	0.98965
(2S)-1,3-benzothiazol-2-yl{2-[(2-pyridin-3-ylethyl)amino]pyrimidin-4-yl}ethanenitrile	0.59846	0.752582	0.004406	1	0.03229	0	0.433659	0	0	0	0	0.30082	0	0	0.301228
(2S)-2-({6-[(3-AMINO-5-CHLOROPHENYL)AMINO]-9-ISOPROPYL-9H-PURIN-2-YL}AMINO)-3-METHYLBUTAN-1-OL	0.999948	0.927132	0.998314	1	0.999476	1	0.541405	0.999286	1	1	1	0.999033	1	1	0.999098
(2S)-2-(1H-indol-3-yl)hexanoic acid	0.201789	0.100888	0.001143	0	0	0	0.135976	0	0	0	0	0.002044	0	0	0.068325
(2S)-2-(1H-indol-3-yl)pentanoic acid	0.201789	0.100888	0.001143	0	0	0	0.135976	0	0	0	0	0.002044	0	0	0.068325
(2S)-2-(3-{[AMINO(IMINO)METHYL]AMINO}PHENYL)-3-[(S)-HYDROXY(3-PHENYLPROPYL)PHOSPHORYL]PROPANOIC ACID	0.998697	0.364762	0.999907	1	1	1	0.444294	0.999286	1	1	1	0.995551	1	1	0.998052
(2S)-2-(3-bromophenyl)-3-(5-chloro-2-hydroxyphenyl)-1,3-thiazolidin-4-one	0.008373	0.113605	6.1e-05	0	0.051587	0.013889	0.283183	0.020408	0.017143	0	0	0.003654	0.013889	0	0.004029
(2S)-2-(4-{[3-CHLORO-5-(TRIFLUOROMETHYL)PYRIDIN-2-YL]OXY}PHENOXY)PROPANOIC ACID	0.999075	0.676652	0.999998	1	1	1	0.496609	0.999286	1	1	1	0.995027	1	1	0.998033
(2S)-2-(4-chlorophenoxy)-3-phenylpropanoic acid	0.005726	0.102552	0.001566	0	0.002994	0	0.137391	0	0	0	0	0.003243	0	0	0.003512
(2S)-2-(4-CHLOROPHENYL)-2-[4-(1H-PYRAZOL-4-YL)PHENYL]ETHANAMINE	0.00733	0.104497	0.00248	0	0.026944	0.013889	0.398379	0.020408	0.017143	0	0	0.012804	0.013889	0	0.007538
(2S)-2-(4-ethylphenoxy)-3-phenylpropanoic acid	0.005726	0.102552	0.001566	0	0.002994	0	0.137391	0	0	0	0	0.003243	0	0	0.003512
(2S)-2-(biphenyl-4-yloxy)-3-phenylpropanoic acid	0.005726	0.102552	0.001566	0	0.002994	0	0.137391	0	0	0	0	0.003243	0	0	0.003512
(2S)-2-(BUTYRYLOXY)-3-HYDROXYPROPYL NONANOATE	0.067722	0.609649	8.9e-05	0	0.001865	0	0.506629	0	0	0	0	0.000598	0	0	0.022803
(2S)-2-[3-(AMINOMETHYL)PHENYL]-3-[(R)-[(1R)-1-{[(BENZYLOXY)CARBONYL]AMINO}-2-METHYLPROPYL](HYDROXY)PHOSPHORYL]PROPANOIC ACID	0.999825	0.742071	0.999889	1	0.939789	1	0.623926	1	1	1	1	0.997794	1	1	0.999169
(2S)-2-[3-(AMINOMETHYL)PHENYL]-3-[(R)-HYDROXY{(1R)-2-METHYL-1-[(PHENYLSULFONYL)AMINO]PROPYL}PHOSPHORYL]PROPANOIC ACID	0.998697	0.364762	0.999907	1	1	1	0.444294	0.999286	1	1	1	0.995551	1	1	0.998052
(2S)-2-[3-(AMINOMETHYL)PHENYL]-3-{(R)-HYDROXY[(1R)-2-METHYL-1-{[(3-PHENYLPROPYL)SULFONYL]AMINO}PROPYL]PHOSPHORYL}PROPANOIC ACID	0.998697	0.364762	0.999907	1	1	1	0.444294	0.999286	1	1	1	0.995551	1	1	0.998052
(2S)-2-[3-(AMINOMETHYL)PHENYL]-3-{(S)-HYDROXY[(1R)-2-METHYL-1-{[(2-PHENYLETHYL)SULFONYL]AMINO}PROPYL]PHOSPHORYL}PROPANOIC ACID	0.998697	0.364762	0.999907	1	1	1	0.444294	0.999286	1	1	1	0.995551	1	1	0.998052
(2S)-2-{[3-(3-aminophenyl)imidazo[1,2-b]pyridazin-6-yl]amino}-3-methylbutan-1-ol	0.969324	0.272802	0.999998	1	1	1	0.032481	0	1	1	0.9	0.995176	1	1	0.988166
(2S)-2-{[HYDROXY(4-IODOBENZYL)PHOSPHORYL]METHYL}PENTANEDIOIC ACID	0.998281	0.997075	0.999874	1	0.914822	1	0.638066	1	1	1	1	0.997368	1	1	0.998508
(2S)-2-{3-[({[2-fluoro-4-(trifluoromethyl)phenyl]carbonyl}amino)methyl]-4-methoxybenzyl}butanoic acid	0.005726	0.102552	0.001566	0	0.002994	0	0.137391	0	0	0	0	0.003243	0	0	0.003512
(2S)-2-amino-5-oxo-5-[(4-phenylmethoxyphenyl)amino]pentanoic acid	0.988559	0.085109	0.999878	1	1	1	0.128156	0.999286	1	1	1	0.996794	1	1	0.995077
(2S)-2-ETHOXY-3-{4-[2-(10H-PHENOXAZIN-10-YL)ETHOXY]PHENYL}PROPANOIC ACID	0.007804	0.083479	2.1e-05	0	0.03229	0	0.14452	0	0	0	0	0.000352	0	0	0.002726
(2S)-2-hydroxy-2-methyl-N-[4-nitro-3-(trifluoromethyl)phenyl]-3-(pentafluorophenoxy)propanamide	0.999999	0.999997	1	1	0.883626	1	0.999733	0.999178	1	1	1	0.999812	1	1	0.999937
(2S)-2-HYDROXYOCTANOIC ACID	0.996338	1	0.999484	1	0.989434	1	0.379816	1	1	1	1	1	1	1	0.998607
(2S)-2-methoxy-3-{4-[2-(5-methyl-2-phenyl-1,3-oxazol-4-yl)ethoxy]-1-benzothiophen-7-yl}propanoic acid	0.000422	0.075512	2.1e-05	0	0.03229	0	0.261474	0	0	0	0	0.0013	0	0	0.000581
(2S)-2-methyl-2,3-dihydrothieno[2,3-f][1,4]oxazepin-5-amine	0.981515	0.09804	0.999998	1	1	1	0.096799	0.999286	1	1	1	0.995176	1	1	0.99223
(2S)-3-(1-{[2-(2-CHLOROPHENYL)-5-METHYL-1,3-OXAZOL-4-YL]METHYL}-1H-INDOL-5-YL)-2-ETHOXYPROPANOIC ACID	0.010879	0.154315	2.1e-05	0	0.03229	0	0.334267	0	0	0	0	0.0013	0	0	0.004067
(2S)-3-(4-chloro-3-fluorophenoxy)-N-[4-cyano-3-(trifluoromethyl)phenyl]-2-hydroxy-2-methylpropanamide	0.799438	0.999876	0.478896	0	0.757728	1	0.903423	0	1	1	0.6	0.799179	1	1	0.692504
(2S)-3-[(R)-[(1S)-1-amino-3-phenylpropyl](hydroxy)phosphoryl]-2-benzylpropanoic acid	0.201789	0.100888	0.001143	0	0	0	0.135976	0	0	0	0	0.002044	0	0	0.068325
(2S)-3-[4-(acetylamino)phenoxy]-2-hydroxy-2-methyl-N-[4-nitro-3-(trifluoromethyl)phenyl]propanamide	0.799438	0.999876	0.478896	0	0.757728	1	0.903423	0	1	1	0.6	0.799179	1	1	0.692504
(2S)-4-(2,5-difluorophenyl)-N-[(3R,4S)-3-fluoro-1-methylpiperidin-4-yl]-2-(hydroxymethyl)-N-methyl-2-phenyl-2,5-dihydro-1H-pyrrole-1-carboxamide	0.999993	0.948907	0.997491	1	0.5	0	0.484505	0.999286	0	0	0.5	0.899033	0	1	0.965506
(2S)-4-(2,5-DIFLUOROPHENYL)-N-METHYL-2-PHENYL-N-PIPERIDIN-4-YL-2,5-DIHYDRO-1H-PYRROLE-1-CARBOXAMIDE	0.999993	0.948907	0.997491	1	0.5	0	0.484505	0.999286	0	0	0.5	0.899033	0	1	0.965506
(2S)-4-(2,5-DIFLUOROPHENYL)-N,N-DIMETHYL-2-PHENYL-2,5-DIHYDRO-1H-PYRROLE-1-CARBOXAMIDE	0.999993	0.948907	0.997491	1	0.5	0	0.484505	0.999286	0	0	0.5	0.899033	0	1	0.965506
(2S)-4-(4-fluorobenzyl)-N-(2-sulfanylethyl)piperazine-2-carboxamide	0.992854	1	0.998986	1	0.989434	1	0.556601	1	1	1	1	1	1	1	0.99728
(2S)-4-(4-fluorobenzyl)-N-(3-sulfanylpropyl)piperazine-2-carboxamide	0.921542	0.030615	0.997929	1	1	1	0.356023	0.999286	1	1	1	0.997541	1	1	0.972337
(2S)-4-METHYL-2-(3-PHENYLTHIOUREIDO)-N-((3S)-TETRAHYDRO-2-HYDROXY-3-FURANYL)PENTANAMIDE	0.037509	0.786112	7.6e-05	0	0.00122	0	0.558118	0	0	0	0	0.0021	0	0	0.013228
(2S)-6-(2,4-DIAMINO-6-ETHYLPYRIMIDIN-5-YL)-2-(3,5-DIFLUOROPHENYL)-4-(3-METHOXYPROPYL)-2H-1,4-BENZOXAZIN-3(4H)-ONE	0.002072	0	2.1e-05	0	0.080865	0	0	0	0	0	0	0.000581	0	0	0.000891
(2S)-8-[(tert-butoxycarbonyl)amino]-2-(1H-indol-3-yl)octanoic acid	0.201789	0.100888	0.001143	0	0	0	0.135976	0	0	0	0	0.002044	0	0	0.068325
(2s)-Hydroxy(4-Hydroxyphenyl)Ethanenitrile	0.680447	0.04891	0.997011	1	1	1	0.30899	0.999286	1	1	1	0.997541	1	1	0.891666
(2S)-N-(4-cyano-3-iodophenyl)-3-(4-cyanophenoxy)-2-hydroxy-2-methylpropanamide	0.799438	0.999876	0.478896	0	0.757728	1	0.903423	0	1	1	0.6	0.799179	1	1	0.692504
(2S)-N-[(3S)-1-(2-AMINO-2-OXOETHYL)-2-OXO-1,2,3,4-TETRAHYDROQUINOLIN-3-YL]-2-CHLORO-2H-THIENO[2,3-B]PYRROLE-5-CARBOXAMIDE	0.001343	0	0.000605	0	0.042886	0	0	0.012346	0.010526	0	0	0.001102	0	0	0.001017
(2S)-N-[(3Z)-5-CYCLOPROPYL-3H-PYRAZOL-3-YLIDENE]-2-[4-(2-OXOIMIDAZOLIDIN-1-YL)PHENYL]PROPANAMIDE	0.013396	0.687792	9.2e-05	0	0.00122	0	0.499805	0	0	0	0	0.0021	0	0	0.005196
(2s)-Pyrrolidin-2-Ylmethylamine	0.997123	0.813994	0.999671	1	0.930433	1	0.668199	0.999292	1	1	1	0.681909	1	1	0.892901
(2Z,3E)-2,3'-BIINDOLE-2',3(1H,1'H)-DIONE 3-{O-[(3R)-3,4-DIHYDROXYBUTYL]OXIME}	0.999145	0.91232	0.99469	1	0.966712	1	0.547315	1	1	1	1	0.999213	1	1	0.997683
(2Z)-2-cyano-N-(2,2'-dichlorobiphenyl-4-yl)-3-hydroxybut-2-enamide	0.076201	0	0.997372	0	0	0	0	0.002606	0	0	0	0.2	0	1	0.424524
(2Z)-2-cyano-N-(3'-ethoxybiphenyl-4-yl)-3-hydroxybut-2-enamide	0.944698	1	1	1	0.962804	1	0.172258	0.999307	1	1	1	1	1	1	0.981566
(2Z)-5'-BROMO-2,3'-BIINDOLE-2',3(1H,1'H)-DIONE AMMONIATE	0.999419	0.915219	0.996361	1	0.966712	1	0.548806	1	1	1	1	0.999213	1	1	0.998331
(2Z)-N-(3-chloro-2'-methoxybiphenyl-4-yl)-2-cyano-3-hydroxybut-2-enamide	0.076201	0	0.997372	0	0	0	0	0.002606	0	0	0	0.2	0	1	0.424524
(2Z)-N-biphenyl-4-yl-2-cyano-3-cyclopropyl-3-hydroxyprop-2-enamide	0.076201	0	0.997372	0	0	0	0	0.002606	0	0	0	0.2	0	1	0.424524
(2Z)-N-biphenyl-4-yl-2-cyano-3-hydroxybut-2-enamide	0.944698	1	1	1	0.962804	1	0.172258	0.999307	1	1	1	1	1	1	0.981566
(3-{3-[[2-Chloro-3-(Trifluoromethyl)Benzyl](2,2-Diphenylethyl)Amino]Propoxy}Phenyl)Acetic Acid	0.095981	0.393599	0.097885	0	0.981132	1	0.435252	0	0	0	0	0.18618	1	0	0.126682
(3-Carboxy-2-(R)-Hydroxy-Propyl)-Trimethyl-Ammonium	0.991835	0.110578	0.999998	1	1	1	0.101043	0.999286	1	1	1	0.995176	1	1	0.99567
(3-Chloro-4-Propoxy-Phenyl)-Acetic Acid	0.012883	0.894923	0.009021	0	0.00122	0	0.49062	0	0	0	0	0.001633	0	0	0.007846
(3-ENDO)-8-METHYL-8-AZABICYCLO[3.2.1]OCT-3-YL 1H-PYRROLO[2,3-B]PYRIDINE-3-CARBOXYLATE	0.999792	0.927125	0.994791	1	0.999476	1	0.544563	0.999286	1	1	1	0.999033	1	1	0.997872
(3-EXO)-3-(10,11-DIHYDRO-5H-DIBENZO[A,D][7]ANNULEN-5-YLOXY)-8,8-DIMETHYL-8-AZONIABICYCLO[3.2.1]OCTANE	0.008155	0.097849	0.000224	0	0	0	0.155097	0	0	0	0	0.003243	0	0	0.003874
(3,3-dimethylpiperidin-1-yl)(6-(3-fluoro-4-methylphenyl)pyridin-2-yl)methanone	0.045684	0.654573	0.000338	0	0.481132	0	0.647987	0	0.017143	0	0	0	0	0	0.015341
(3,4-DIHYDROXY-2-NITROPHENYL)(PHENYL)METHANONE	0.201687	0.100888	0.001141	0	0	0	0.135971	0	0	0	0	0.002044	0	0	0.06829
(3,4,5-Trihydroxy-6-Hydroxymethyl-Tetrahydro-Pyran-2-Yl)-Phosphoramidic Acid Dimethyl Ester	0.996524	1	0.999568	1	0.984724	1	0.545622	0.999265	1	1	1	0.999127	1	1	0.998406
(3AALPHA,4ALPHA,7ALPHA,7AALPHA)- 3A,4,7,7A-TETRAHYDRO-2-(4-NITRO-1-NAPHTHALENYL)-4,7-ETHANO-1H-ISOINDOLE-1,3(2H)-DIONE	0.799438	0.999876	0.478896	0	0.757728	1	0.903423	0	1	1	0.6	0.799179	1	1	0.692504
(3ALPHA,5BETA,12ALPHA)-3,12-DIHYDROXYCHOLAN-24-OIC ACID	0.012014	0.254837	3.5e-05	0	0.03229	0	0.49577	0	0	0	0	0.0013	0	0	0.00445
(3AR,6R,6AS)-6-((S)-((S)-CYCLOHEX-2-ENYL)(HYDROXY)METHYL)-6A-METHYL-4-OXO-HEXAHYDRO-2H-FURO[3,2-C]PYRROLE-6-CARBALDEHYDE	0.89247	0.025825	0.997964	1	1	1	0.385442	0.999286	1	1	1	0.997541	1	1	0.962658
(3AS,4R,9BR)-2,2-DIFLUORO-4-(4-HYDROXYPHENYL)-1,2,3,3A,4,9B-HEXAHYDROCYCLOPENTA[C]CHROMEN-8-OL	0.476708	0.895928	0.02645	0	0.155068	0	0.676082	0	0	0	0	0	0	0	0.167719
(3aS,4R,9bR)-2,2-difluoro-4-(4-hydroxyphenyl)-6-(methoxymethyl)-1,2,3,3a,4,9b-hexahydrocyclopenta[c]chromen-8-ol	0.998844	0.999988	1	1	0.666645	1	0.859695	0.997619	1	1	1	0.999901	1	1	0.999582
(3AS,4R,9BR)-4-(4-HYDROXYPHENYL)-1,2,3,3A,4,9B-HEXAHYDROCYCLOPENTA[C]CHROMEN-8-OL	0.59934	0.956461	0.048212	0	0.009202	0	0.815842	0	0	0	0	0.00679	0	0	0.218114
(3AS,4R,9BR)-4-(4-HYDROXYPHENYL)-1,2,3,3A,4,9B-HEXAHYDROCYCLOPENTA[C]CHROMEN-9-OL	1	0.999429	1	1	0.504132	1	0.861328	0.997226	1	1	1	1	1	1	1
(3AS,4R,9BR)-4-(4-HYDROXYPHENYL)-6-(METHOXYMETHYL)-1,2,3,3A,4,9B-HEXAHYDROCYCLOPENTA[C]CHROMEN-8-OL	0.476708	0.895928	0.02645	0	0.155068	0	0.676082	0	0	0	0	0	0	0	0.167719
(3aS)-3a-hydroxy-1-phenyl-1,2,3,3a-tetrahydro-4H-pyrrolo[2,3-b]quinolin-4-one	0.999885	0.99406	0.999995	1	0.999476	1	0.764111	0.999286	1	1	1	0.999033	1	1	0.999638
(3aS)-3a-hydroxy-5-methyl-1-phenyl-1,2,3,3a-tetrahydro-4H-pyrrolo[2,3-b]quinolin-4-one	0.999885	0.99406	0.999995	1	0.999476	1	0.764111	0.999286	1	1	1	0.999033	1	1	0.999638
(3aS)-3a-hydroxy-7-methyl-1-phenyl-1,2,3,3a-tetrahydro-4H-pyrrolo[2,3-b]quinolin-4-one	0.999885	0.99406	0.999995	1	0.999476	1	0.764111	0.999286	1	1	1	0.999033	1	1	0.999638
(3ASR,4RS,8ASR,8BRS)-4-(2-(4-FLUOROBENZYL)-1,3-DIOXODEACAHYDROPYRROLO[3,4-A] PYRROLIZIN-4-YL)BENZAMIDINE	0.999935	0.99999	0.999539	1	0.97412	1	0.974446	0.999238	1	1	1	0.997747	1	1	0.999074
(3e)-3-[(4-Hydroxyphenyl)Imino]-1h-Indol-2(3h)-One	0.96579	0.867233	0.563064	1	0.5	0	0.444671	0.999286	0	0	0	0.200711	0	1	0.576522
(3E)-3-[(phenylamino)methylidene]dihydrofuran-2(3H)-one	0.975003	0.561024	0.999938	1	0.978882	1	0.088065	1	1	1	1	0.999578	1	1	0.991506
(3E)-4-(1-METHYL-1H-INDOL-3-YL)BUT-3-EN-2-ONE	0.837935	0.237524	0.999996	0	0.002994	0	0.188876	0.999286	0	0	0.3	0.307436	0	1	0.715122
(3E)-5-fluoro-1-[(6-fluoro-4H-1,3-benzodioxin-8-yl)methyl]-1H-indole-2,3-dione 3-oxime	0.998372	0.908707	0.9851	1	0.999476	1	0.495373	0.999286	1	1	1	0.898481	1	1	0.960651
(3e)-6'-Bromo-2,3'-Biindole-2',3(1h,1'h)-Dione 3-Oxime	0.824762	0.804833	0.075613	1	0.03229	0	0.46075	0	0	0	0	0.30082	0	0	0.400398
(3R,4R,5R)-5-(HYDROXYMETHYL)-1-(3-PHENYLPROPYL)PIPERIDINE-3,4-DIOL	0.996524	1	0.999568	1	0.984724	1	0.545622	0.999265	1	1	1	0.999127	1	1	0.998406
(3R,4R)-1-{6-[3-(METHYLSULFONYL)PHENYL]PYRIMIDIN-4-YL}-4-(2,4,5-TRIFLUOROPHENYL)PIPERIDIN-3-AMINE	0.997123	0.813994	0.999671	1	0.930433	1	0.668199	0.999292	1	1	1	0.681909	1	1	0.892901
(3R,4R)-4-(pyrrolidin-1-ylcarbonyl)-1-(quinoxalin-2-ylcarbonyl)pyrrolidin-3-amine	0.995526	0.557523	1	1	0.75	1	0.776382	0.998502	1	1	1	0.998289	1	1	0.997938
(3R,4S)-1-(3,4-DIMETHOXYPHENYL)-3-(3-METHYLPHENYL)PIPERIDIN-4-AMINE	0.997123	0.813994	0.999671	1	0.930433	1	0.668199	0.999292	1	1	1	0.681909	1	1	0.892901
(3R,4S)-1-[6-(6-METHOXYPYRIDIN-3-YL)PYRIMIDIN-4-YL]-4-(2,4,5-TRIFLUOROPHENYL)PYRROLIDIN-3-AMINE	0.997123	0.813994	0.999671	1	0.930433	1	0.668199	0.999292	1	1	1	0.681909	1	1	0.892901
(3R,4S)-1-{6-[3-(METHYLSULFONYL)PHENYL]PYRIMIDIN-4-YL}-4-(2,4,5-TRIFLUOROPHENYL)PYRROLIDIN-3-AMINE	0.997123	0.813994	0.999671	1	0.930433	1	0.668199	0.999292	1	1	1	0.681909	1	1	0.892901
(3R,5S,7R,12S,13R)-13-FORMYL-12,14-DIHYDROXY-3,5,7-TRIMETHYLTETRADECANOIC ACID	0.201789	0.100888	0.001143	0	0	0	0.135976	0	0	0	0	0.002044	0	0	0.068325
(3R,5Z,8S,9S,11E)-8,9,16-TRIHYDROXY-14-METHOXY-3-METHYL-3,4,9,10-TETRAHYDRO-1H-2-BENZOXACYCLOTETRADECINE-1,7(8H)-DIONE	0.998835	0.911077	0.989567	1	0.999476	1	0.496495	0.999286	1	1	1	0.997337	1	1	0.995247
(3r)-1-Acetyl-3-Methylpiperidine	0.802796	0.078477	0.999993	1	1	1	0.099838	0.999286	1	1	1	0.996794	1	1	0.933195
(3R)-3-(aminomethyl)-9-methoxy-1,2,3,4-tetrahydro-5H-[1]benzothieno[3,2-e][1,4]diazepin-5-one	0.99152	0.879894	0.896286	1	0.988155	1	0.511431	1	1	1	1	0.999637	1	1	0.962481
(3R)-3-(FLUOROMETHYL)-7-(THIOMORPHOLIN-4-YLSULFONYL)-1,2,3,4-TETRAHYDROISOQUINOLINE	0.970313	0.202819	0.999998	1	1	1	0.060218	0.999286	1	1	1	0.995176	1	1	0.988496
(3R)-3-(FLUOROMETHYL)-N-(3,3,3-TRIFLUOROPROPYL)-1,2,3,4-TETRAHYDROISOQUINOLINE-7-SULFONAMIDE	0.970313	0.202819	0.999998	1	1	1	0.060218	0.999286	1	1	1	0.995176	1	1	0.988496
(3R)-3-[(1,2,3,4-tetrahydroisoquinolin-7-yloxy)methyl]-2,3-dihydrothieno[2,3-f][1,4]oxazepin-5-amine	0.972855	0.995586	0.999484	1	0.989434	1	0.154025	1	1	1	1	0.999573	1	1	0.990637
(3R)-3-cyclopentyl-6-methyl-7-[(4-methylpiperazin-1-yl)sulfonyl]-3,4-dihydro-2H-1,2-benzothiazine 1,1-dioxide	0.008333	0.122891	0.695847	0	1	1	0.18628	0.999286	1	1	0.4	0.00907	1	0	0.23775
(3R)-3-cyclopentyl-7-[(4-methylpiperazin-1-yl)sulfonyl]-3,4-dihydro-2H-1,2-benzothiazine 1,1-dioxide	0.008333	0.122891	0.695847	0	1	1	0.18628	0.999286	1	1	0.4	0.00907	1	0	0.23775
(3R)-3-ethyl-N-[(4-methylphenyl)sulfonyl]-L-aspartic acid	0.119991	0.438468	9.1e-05	0	0.00122	0	0.37844	0	0	0	0	0.003654	0	0	0.041245
(3R)-3-HYDROXYDODECANOIC ACID	0.951072	0.083758	0.999673	1	1	1	0.129724	0.999286	1	1	0.9	0.996794	1	1	0.982513
(3r)-4-(P-Toluenesulfonyl)-1,4-Thiazane-3-Carboxylicacid-L-Leucine	0.576209	0.150436	0.999998	0	1	1	0.179928	0.999286	1	1	0.9	0.896858	1	1	0.824355
(3r)-4-(P-Toluenesulfonyl)-1,4-Thiazane-3-Carboxylicacid-L-Phenylalanine Ethyl Ester	0.576209	0.150436	0.999998	0	1	1	0.179928	0.999286	1	1	0.9	0.896858	1	1	0.824355
(3R)-4-[(3R)-3-AMINO-4-(2,4,5-TRIFLUOROPHENYL)BUTANOYL]-3-(2,2,2-TRIFLUOROETHYL)-1,4-DIAZEPAN-2-ONE	0.997123	0.813994	0.999671	1	0.930433	1	0.668199	0.999292	1	1	1	0.681909	1	1	0.892901
(3R)-4-[(3R)-3-AMINO-4-(2,4,5-TRIFLUOROPHENYL)BUTANOYL]-3-METHYL-1,4-DIAZEPAN-2-ONE	0.997123	0.813994	0.999671	1	0.930433	1	0.668199	0.999292	1	1	1	0.681909	1	1	0.892901
(3R)-4,4-DIFLUORO-3-[(4-METHOXYPHENYL)SULFONYL]BUTANOIC ACID	0.998754	0.563644	0.999264	1	0.571429	1	0.502312	0.999286	1	1	1	0.988148	1	1	0.995389
(3R)-8-(dioxidosulfanyl)-3-methyl-1,2,3,4-tetrahydroquinoline	0.022719	0.911678	0.011442	0	0.002331	0	0.632735	0.006061	0	0	0	0.004207	0	0	0.012789
(3R)-METHYLCARBAMOYL-7-SULFOAMINO-3,4-DIHYDRO-1H-ISOQUINOLINE-2-CARBOXYLIC ACID BENZYL ESTER	0.345266	0.500198	0.001558	0	0.00122	0	0.419822	0	0	0	0	0.0021	0	0	0.116308
(3R)-N-(4-CHLOROPHENYL)-3-(HYDROXYMETHYL)-1,2,3,4-TETRAHYDROISOQUINOLINE-7-SULFONAMIDE	0.970313	0.202819	0.999998	1	1	1	0.060218	0.999286	1	1	1	0.995176	1	1	0.988496
(3S,5E)-3-propyl-3,4-dihydrothieno[2,3-f][1,4]oxazepin-5(2H)-imine	0.999458	0.460081	0.999998	1	1	1	0.409552	0.999286	1	1	1	0.995027	1	1	0.998161
(3S,5R,7R,8S,9S,10R)-7-(hydroxymethyl)-3-(2-naphthyl)-1,6-dioxa-2-azaspiro[4.5]decane-8,9,10-triol	0.001343	0	0.000605	0	0.042886	0	0	0.012346	0.010526	0	0	0.001102	0	0	0.001017
(3S,5R,7R,8S,9S,10R)-7-(hydroxymethyl)-3-(4-methylphenyl)-1,6-dioxa-2-azaspiro[4.5]decane-8,9,10-triol	0.996524	1	0.999568	1	0.984724	1	0.545622	0.999265	1	1	1	0.999127	1	1	0.998406
(3s,6s,9r,10r,11s,12s,13e,15e,18s,21s)-18-{(1e,3e,7s,8s)-9-[(2s,3r,4s,5s,6r,9s,11s)-9-Ethyl-4-Hydroxy-3,5,11-Trimethyl-8-Oxo-1-Oxa-7-Azaspiro[5.5]Undec-2-Yl]-8-Hydroxy-1,7-Dimethylnona-1,3-Dienyl}-10,12-Dihydroxy-3-(3-Hydroxybenzyl)-6-Isopropyl-11-Methyl-	0.784677	0.635108	0.987724	1	0.976471	0.996885	0.132446	1	0.996885	1	1	0.997049	0.996885	1	0.92315
(3S)-1-(1,3-BENZODIOXOL-5-YLMETHYL)-3-[4-(1H-IMIDAZOL-1-YL)PHENOXY]PIPERIDINE	0.981515	0.09804	0.999998	1	1	1	0.096799	0.999286	1	1	1	0.995176	1	1	0.99223
(3S)-1-{[4-(BUT-2-YN-1-YLOXY)PHENYL]SULFONYL}PYRROLIDINE-3-THIOL	0.70436	0.849747	0.002945	0	0.001865	0	0.584634	0	0	0	0	0.100598	0	0	0.269301
(3S)-3-cyclopentyl-6-methyl-7-[(4-methylpiperazin-1-yl)sulfonyl]-3,4-dihydro-2H-1,2,4-benzothiadiazine 1,1-dioxide	0.008333	0.122891	0.695847	0	1	1	0.18628	0.999286	1	1	0.4	0.00907	1	0	0.23775
(3S)-3-hydroxy-1-methyl-2,3-dihydro-1H-indole-5,6-dione	0.201789	0.100888	0.001143	0	0	0	0.135976	0	0	0	0	0.002044	0	0	0.068325
(3S)-4-{[4-(BUT-2-YNYLOXY)PHENYL]SULFONYL}-N-HYDROXY-2,2-DIMETHYLTHIOMORPHOLINE-3-CARBOXAMIDE	0.814271	0.931928	0.023835	0	0.5	0	0.562091	0.999286	0	0	0	0.401996	0	1	0.413367
(3Z)-1-[(6-fluoro-4H-1,3-benzodioxin-8-yl)methyl]-4-[(E)-2-phenylethenyl]-1H-indole-2,3-dione 3-oxime	0.998372	0.908707	0.9851	1	0.999476	1	0.495373	0.999286	1	1	1	0.898481	1	1	0.960651
(3Z)-1-[(6-fluoro-4H-1,3-benzodioxin-8-yl)methyl]-4-phenyl-1H-indole-2,3-dione 3-oxime	0.998372	0.908707	0.9851	1	0.999476	1	0.495373	0.999286	1	1	1	0.898481	1	1	0.960651
(3Z)-6-(4-HYDROXY-3-METHOXYPHENYL)-3-(1H-PYRROL-2-YLMETHYLENE)-1,3-DIHYDRO-2H-INDOL-2-ONE	0.999792	0.927125	0.994791	1	0.999476	1	0.544563	0.999286	1	1	1	0.999033	1	1	0.997872
(3Z)-N,N-DIMETHYL-2-OXO-3-(4,5,6,7-TETRAHYDRO-1H-INDOL-2-YLMETHYLIDENE)-2,3-DIHYDRO-1H-INDOLE-5-SULFONAMIDE	0.257221	0.903208	0.000142	0	0.00122	0	0.609307	0	0	0	0	0.102426	0	0	0.11993
(4-{(2S)-2-[(tert-butoxycarbonyl)amino]-3-methoxy-3-oxopropyl}phenyl)methaneseleninic acid	0.345266	0.500198	0.001558	0	0.00122	0	0.419822	0	0	0	0	0.0021	0	0	0.116308
(4-{2-Acetylamino-2-[1-(3-Carbamoyl-4-Cyclohexylmethoxy-Phenyl)-Ethylcarbamoyl}-Ethyl}-2-Phosphono-Phenoxy)-Acetic Acid	0.999996	0.991853	0.99999	1	0.966712	1	0.694939	1	1	1	1	0.998577	1	1	0.999521
(4-{4-[(TERT-BUTOXYCARBONYL)AMINO]-2,2-BIS(ETHOXYCARBONYL)BUTYL}PHENYL)SULFAMIC ACID	0.991996	0.964113	0.212045	1	0.5	0	0.608034	0.999286	0	0	0.4	0.499942	0	1	0.567994
(4-AMINO-2-{[1-(METHYLSULFONYL)PIPERIDIN-4-YL]AMINO}PYRIMIDIN-5-YL)(2,3-DIFLUORO-6-METHOXYPHENYL)METHANONE	0.999975	0.934425	0.998387	1	0.999476	1	0.566291	0.999286	1	1	1	0.999033	1	1	0.999132
(4-ETHYLPHENYL)SULFAMIC ACID	0.991996	0.964113	0.212045	1	0.5	0	0.608034	0.999286	0	0	0.4	0.499942	0	1	0.567994
(4-fluorophenyl)(pyridin-4-yl)methanone	0.984874	0.915402	0.999479	1	0.989434	1	0.175037	1	1	1	1	0.999573	1	1	0.994642
(4-sulfamoyl-phenyl)-thiocarbamic acid O-(2-thiophen-3-yl-ethyl) ester	0.97162	0.080163	0.999639	1	1	1	0.124021	0.999286	1	1	1	0.996794	1	1	0.989351
(4ar,6s,8ar)-11-[8-(1,3-Dioxo-1,3-Dihydro-2h-Isoindol-2-Yl)Octyl]-6-Hydroxy-3-Methoxy-5,6,9,10-Tetrahydro-4ah-[1]Benzofuro[3a,3,2-Ef][2]Benzazepin-11-Ium	0.997479	0.513153	0.999847	1	0.993189	1	0.606079	1	1	1	1	0.997794	1	1	0.998373
(4aS,4bR,10bS,12aS)-12a-methyl-1,3-dioxo-2-(pyridin-3-ylmethyl)-1,2,3,4,4a,4b,5,6,10b,11,12,12a-dodecahydronaphtho[2,1-f]isoquinolin-8-yl sulfamate	0.97162	0.080163	0.999639	1	1	1	0.124021	0.999286	1	1	1	0.996794	1	1	0.989351
(4aS)-5-[(2,4-diaminopteridin-6-yl)methyl]-4a,5-dihydro-2H-dibenzo[b,f]azepin-8-ol	0.991799	1	1	1	0.972677	0.995074	0.194858	0.999284	0.995074	1	1	1	0.995074	1	0.997266
(4e)-4-Aminohex-4-Enoic Acid	0.680447	0.04891	0.997011	1	1	1	0.30899	0.999286	1	1	1	0.997541	1	1	0.891666
(4E)-N-(4-fluorophenyl)-4-[(phenylcarbonyl)imino]-4H-pyrazole-3-carboxamide	0.999975	0.934425	0.998387	1	0.999476	1	0.566291	0.999286	1	1	1	0.999033	1	1	0.999132
(4R,2S)-5'-(4-(4-CHLOROBENZYLOXY)PYRROLIDIN-2-YLMETHANESULFONYL)ISOQUINOLINE	0.00733	0.104497	0.00248	0	0.026944	0.013889	0.398379	0.020408	0.017143	0	0	0.012804	0.013889	0	0.007538
(4R,5R)-5-AMINO-1-[2-(1,3-BENZODIOXOL-5-YL)ETHYL]-4-(2,4,5-TRIFLUOROPHENYL)PIPERIDIN-2-ONE	0.997123	0.813994	0.999671	1	0.930433	1	0.668199	0.999292	1	1	1	0.681909	1	1	0.892901
(4R)-4-(3-butoxy-4-methoxybenzyl)imidazolidin-2-one	0.998744	0.583571	0.999881	1	1	1	0.600599	0.999286	1	1	1	0.995551	1	1	0.998059
(4R)-4-(3-HYDROXYPHENYL)-N,N,7,8-TETRAMETHYL-3,4-DIHYDROISOQUINOLINE-2(1H)-CARBOXAMIDE	0.999993	0.948907	0.997491	1	0.5	0	0.484505	0.999286	0	0	0.5	0.899033	0	1	0.965506
(4R)-7-chloro-9-methyl-1-oxo-1,2,4,9-tetrahydrospiro[beta-carboline-3,4'-piperidine]-4-carbonitrile	0.96579	0.867233	0.563064	1	0.5	0	0.444671	0.999286	0	0	0	0.200711	0	1	0.576522
(4R)-7,8-dichloro-1',9-dimethyl-1-oxo-1,2,4,9-tetrahydrospiro[beta-carboline-3,4'-piperidine]-4-carbonitrile	0.998109	0.909713	0.978142	1	0.999476	1	0.493773	0.999286	1	1	1	0.977337	1	1	0.98453
(4R)-N-[4-({[2-(DIMETHYLAMINO)ETHYL]AMINO}CARBONYL)-1,3-THIAZOL-2-YL]-4-METHYL-1-OXO-2,3,4,9-TETRAHYDRO-1H-BETA-CARBOLINE-6-CARBOXAMIDE	0.994767	0.904991	0.902248	1	0.999476	1	0.488925	0.999286	1	1	1	0.3803	1	1	0.759105
(4s-Trans)-4-(Methylamino)-5,6-Dihydro-6-Methyl-4h-Thieno(2,3-B)Thiopyran-2-Sulfonamide-7,7-Dioxide	0.96533	0.694746	0.99935	1	0.930826	1	0.161165	1	1	1	1	0.999573	1	1	0.988084
(4S,5E,7Z,10Z,13Z,16Z,19Z)-4-hydroxydocosa-5,7,10,13,16,19-hexaenoic acid	0.005726	0.102552	0.001566	0	0.002994	0	0.137391	0	0	0	0	0.003243	0	0	0.003512
(4s)-5-Fluoro-L-Leucine	0.98809	0.649248	0.953899	1	0.571429	1	0.603102	0	1	0	0	0.988148	1	1	0.976712
(4Z)-2,8:7,12:11,15:14,18:17,22-PENTAANHYDRO-4,5,6,9,10,13,19,20,21-NONADEOXY-D-ARABINO-D-ALLO-D-ALLO-DOCOSA-4,9,20-TRIENITOL	0.090329	0.863873	0.000119	0	0.00122	0	0.481391	0	0	0	0	0.003654	0	0	0.031367
(4Z)-6-bromo-4-({[4-(pyrrolidin-1-ylmethyl)phenyl]amino}methylidene)isoquinoline-1,3(2H,4H)-dione	0.999952	0.999792	0.999958	1	0.974937	1	0.800291	0.999263	1	1	1	0.999453	1	1	0.999787
(5-(PYRIDIN-3-YL)FURAN-2-YL)METHANAMINE	0.000258	0.126312	0.00011	0	0.002994	0	0.203996	0	0	0	0	0.003654	0	0	0.001341
(5-{3-[5-(PIPERIDIN-1-YLMETHYL)-1H-INDOL-2-YL]-1H-INDAZOL-6-YL}-2H-1,2,3-TRIAZOL-4-YL)METHANOL	0.999792	0.927125	0.994791	1	0.999476	1	0.544563	0.999286	1	1	1	0.999033	1	1	0.997872
(5-CHLORO-2-{[(3-NITROBENZYL)AMINO]CARBONYL}PHENOXY)ACETIC ACID	0.905185	0.026104	0.997963	1	1	1	0.380321	0.999286	1	1	1	0.997541	1	1	0.966896
(5-Chloropyrazolo[1,5-a]Pyrimidin-7-Yl)-(4-Methanesulfonylphenyl)Amine	0.999975	0.934425	0.998387	1	0.999476	1	0.566291	0.999286	1	1	1	0.999033	1	1	0.999132
(5-Oxo-5,6-Dihydro-Indolo[1,2-a]Quinazolin-7-Yl)-Acetic Acid	0.465677	0.649298	0.000448	0	0.03229	0	0.373447	0	0	0	0	0.20082	0	0	0.222315
(5-phenyl-7-(pyridin-3-ylmethylamino)pyrazolo[1,5-a]pyrimidin-3-yl)methanol	0.999975	0.934425	0.998387	1	0.999476	1	0.566291	0.999286	1	1	1	0.999033	1	1	0.999132
(5,6-DIPHENYL-FURO[2,3-D]PYRIMIDIN-4-YLAMINO)-ACETIC	0.999792	0.927125	0.994791	1	0.999476	1	0.544563	0.999286	1	1	1	0.999033	1	1	0.997872
(5BETA)-PREGNANE-3,20-DIONE	0.023522	0.218066	6.9e-05	0	0.05	0	0.379581	0	0	0	0	0.003654	0	0	0.009082
(5E,13E)-11-HYDROXY-9,15-DIOXOPROSTA-5,13-DIEN-1-OIC ACID	0.623809	0.179656	0.999692	1	1	1	0.308383	0.999286	1	1	0.6	0.801333	1	1	0.808278
(5e,13e)-9,15-Dihydroxy-11-Oxoprosta-5,13-Dien-1-Oicacid	0.940947	1	9.9e-05	1	0.930826	1	0.551871	1	1	1	1	0.9	1	0	0.613682
(5E,14E)-11-oxoprosta-5,9,12,14-tetraen-1-oic acid	0.005726	0.102552	0.001566	0	0.002994	0	0.137391	0	0	0	0	0.003243	0	0	0.003512
(5E,7S)-2-amino-7-(4-fluoro-2-pyridin-3-ylphenyl)-4-methyl-7,8-dihydroquinazolin-5(6H)-one oxime	0.975003	0.561024	0.999938	1	0.978882	1	0.088065	1	1	1	1	0.999578	1	1	0.991506
(5E)-12-CHLORO-13,15-DIHYDROXY-4,7,8,9-TETRAHYDRO-2-BENZOXACYCLOTRIDECINE-1,10(3H,11H)-DIONE	0.993337	0.091628	0.999989	1	1	1	0.121278	0.999286	1	1	1	0.996794	1	1	0.996707
(5E)-14-CHLORO-15,17-DIHYDROXY-4,7,8,9,10,11-HEXAHYDRO-2-BENZOXACYCLOPENTADECINE-1,12(3H,13H)-DIONE	0.993337	0.091628	0.999989	1	1	1	0.121278	0.999286	1	1	1	0.996794	1	1	0.996707
(5E)-5-[(2,2-DIFLUORO-1,3-BENZODIOXOL-5-YL)METHYLENE]-1,3-THIAZOLIDINE-2,4-DIONE	0.102162	0.09246	6.5e-05	0	0.038947	0	0.000154	0	0	0	0	0.000774	0	0	0.034334
(5R,6E,8Z,11Z,14Z,17Z)-5-hydroxyicosa-6,8,11,14,17-pentaenoic acid	0.005726	0.102552	0.001566	0	0.002994	0	0.137391	0	0	0	0	0.003243	0	0	0.003512
(5R,6S,8S)-8-[3-(AMINOMETHYL)PHENYL]-6-HYDROXY-5-ISOPROPYL-3-OXO-1-PHENYL-2,7-DIOXA-4-AZA-6-PHOSPHANONAN-9-OIC ACID 6-OXIDE	0.998697	0.364762	0.999907	1	1	1	0.444294	0.999286	1	1	1	0.995551	1	1	0.998052
(5R,7R,8S,9S,10R)-7-(hydroxymethyl)-3-phenyl-1,6-dioxa-2-azaspiro[4.5]dec-2-ene-8,9,10-triol	0.996524	1	0.999568	1	0.984724	1	0.545622	0.999265	1	1	1	0.999127	1	1	0.998406
(5R)-2-[(2-fluorophenyl)amino]-5-(1-methylethyl)-1,3-thiazol-4(5H)-one	0.045684	0.654573	0.000338	0	0.481132	0	0.647987	0	0.017143	0	0	0	0	0	0.015341
(5R)-2-SULFANYL-5-[4-(TRIFLUOROMETHYL)BENZYL]-1,3-THIAZOL-4-ONE	1	0.992973	0.999899	1	0.999476	1	0.688848	0.999286	1	1	1	0.999367	1	1	0.999755
(5R)-5-(4-{[(2R)-6-HYDROXY-2,5,7,8-TETRAMETHYL-3,4-DIHYDRO-2H-CHROMEN-2-YL]METHOXY}BENZYL)-1,3-THIAZOLIDINE-2,4-DIONE	7.4e-05	0	0	0	0.07421	0	0	0	0	0	0	0.000224	0	0	9.9e-05
(5r)-6-(4-{[2-(3-Iodobenzyl)-3-Oxocyclohex-1-En-1-Yl]Amino}Phenyl)-5-Methyl-4,5-Dihydropyridazin-3(2h)-One	0.9714	0.583448	0.999023	1	0.800284	1	0.171594	1	1	1	1	0.999573	1	1	0.989998
(5R)-N,N-DIETHYL-5-METHYL-2-[(THIOPHEN-2-YLCARBONYL)AMINO]-4,5,6,7-TETRAHYDRO-1-BENZOTHIOPHENE-3-CARBOXAMIDE	0.999993	0.948907	0.997491	1	0.5	0	0.484505	0.999286	0	0	0.5	0.899033	0	1	0.965506
(5S,8R,9S,10S,13R,14S,17S)-13-{2-[(3,5-DIFLUOROBENZYL)OXY]ETHYL}-17-HYDROXY-10-METHYLHEXADECAHYDRO-3H-CYCLOPENTA[A]PHENANTHREN-3-ONE	0.999994	0.999995	1	1	0.893863	1	0.999382	0.998342	1	1	1	0.998348	1	1	0.999447
(5S)-2-(cyclooctylamino)-5-methyl-5-propyl-1,3-thiazol-4(5H)-one	0.045684	0.654573	0.000338	0	0.481132	0	0.647987	0	0.017143	0	0	0	0	0	0.015341
(5S)-2-{[(1S)-1-(2-fluorophenyl)ethyl]amino}-5-methyl-5-(trifluoromethyl)-1,3-thiazol-4(5H)-one	0.045684	0.654573	0.000338	0	0.481132	0	0.647987	0	0.017143	0	0	0	0	0	0.015341
(5S)-2-{[(1S)-1-(4-fluorophenyl)ethyl]amino}-5-(1-hydroxy-1-methylethyl)-5-methyl-1,3-thiazol-4(5H)-one	0.045684	0.654573	0.000338	0	0.481132	0	0.647987	0	0.017143	0	0	0	0	0	0.015341
(5S)-3-ANILINO-5-(2,4-DIFLUOROPHENYL)-5-METHYL-1,3-OXAZOLIDINE-2,4-DIONE	0.598261	0.054879	0.99434	1	1	1	0.287522	0.999286	1	1	1	0.955	1	1	0.8492
(5S)-4,5-difluoro-6-[(2-fluoro-4-iodophenyl)imino]-N-(2-hydroxyethoxy)cyclohexa-1,3-diene-1-carboxamide	0.948506	0.835347	0.578144	1	0.03229	0	0.464059	0	0	0	0	0.30082	0	1	0.609156
(5S)-5-(2-amino-2-oxoethyl)-4-oxo-N-[(3-oxo-3,4-dihydro-2H-1,4-benzoxazin-6-yl)methyl]-3,4,5,6,7,8-hexahydro[1]benzothieno[2,3-d]pyrimidine-2-carboxamide	0.999717	0.399433	0.999726	1	1	1	0.458535	0.999286	1	1	1	0.994331	1	1	0.997925
(5S)-5-(3-AMINOPROPYL)-3-(2,5-DIFLUOROPHENYL)-N-ETHYL-5-PHENYL-4,5-DIHYDRO-1H-PYRAZOLE-1-CARBOXAMIDE	0.999993	0.948907	0.997491	1	0.5	0	0.484505	0.999286	0	0	0.5	0.899033	0	1	0.965506
(5s)-5-Iododihydro-2,4(1h,3h)-Pyrimidinedione	0.997294	0.636077	0.999998	1	1	1	0.346123	0.999286	1	1	1	0.995027	1	1	0.99744
(5Z)-12-CHLORO-13,15-DIHYDROXY-4,7,8,9-TETRAHYDRO-2-BENZOXACYCLOTRIDECINE-1,10(3H,11H)-DIONE	0.993337	0.091628	0.999989	1	1	1	0.121278	0.999286	1	1	1	0.996794	1	1	0.996707
(5Z)-13-CHLORO-14,16-DIHYDROXY-3,4,7,8,9,10-HEXAHYDRO-1H-2-BENZOXACYCLOTETRADECINE-1,11(12H)-DIONE	0.993337	0.091628	0.999989	1	1	1	0.121278	0.999286	1	1	1	0.996794	1	1	0.996707
(5Z)-5-(3-BROMOCYCLOHEXA-2,5-DIEN-1-YLIDENE)-N-(PYRIDIN-4-YLMETHYL)-1,5-DIHYDROPYRAZOLO[1,5-A]PYRIMIDIN-7-AMINE	0.999419	0.915219	0.996361	1	0.966712	1	0.548806	1	1	1	1	0.999213	1	1	0.998331
(6AR,11AS,11BR)-10-ACETYL-9-HYDROXY-7,7-DIMETHYL-2,6,6A,7,11A,11B-HEXAHYDRO-11H-PYRROLO[1',2':2,3]ISOINDOLO[4,5,6-CD]INDOL-11-ONE	0.997981	0.469204	0.999919	1	0.861059	1	0.688899	0	1	1	0.8	0.998221	1	1	0.998707
(6E,11E)-HEPTADECA-6,11-DIENE-9,9-DIYLBIS(PHOSPHONIC ACID)	0.364388	0.101783	0.731516	0	1	1	0.316707	0.999286	1	1	1	0.201633	1	1	0.432512
(6E)-7-{6-[(1E)-OCT-1-ENYL]-2,3-DIAZABICYCLO[2.2.1]HEPT-2-EN-5-YL}HEPT-6-ENOIC ACID	0.000258	0.126312	0.00011	0	0.002994	0	0.203996	0	0	0	0	0.003654	0	0	0.001341
(6r,1'r,2's)-5,6,7,8 Tetrahydrobiopterin	0.03398	0.15206	6.5e-05	0	0.051587	0.013889	0.331297	0.020408	0.017143	0	0	0.005344	0.013889	0	0.01313
(6R)-2-amino-6-[2-(3'-methoxybiphenyl-3-yl)ethyl]-3,6-dimethyl-5,6-dihydropyrimidin-4(3H)-one	0.921542	0.030615	0.997929	1	1	1	0.356023	0.999286	1	1	1	0.997541	1	1	0.972337
(6S)-1-chloro-3-[(4-fluorobenzyl)oxy]-6-(pyrrolidin-1-ylcarbonyl)pyrrolo[1,2-a]pyrazin-4(6H)-one	0.966956	0.077019	0.999998	1	1	1	0.070447	0.999286	1	1	1	0.996794	1	1	0.987916
(6S)-2-amino-6-(3'-methoxybiphenyl-3-yl)-3,6-dimethyl-5,6-dihydropyrimidin-4(3H)-one	0.921542	0.030615	0.997929	1	1	1	0.356023	0.999286	1	1	1	0.997541	1	1	0.972337
(7R,8R)-8-(2,4,5-trifluorophenyl)-6,7,8,9-tetrahydroimidazo[1,2-a:4,5-c']dipyridin-7-amine	0.997123	0.813994	0.999671	1	0.930433	1	0.668199	0.999292	1	1	1	0.681909	1	1	0.892901
(7S)-2-(2-aminopyrimidin-4-yl)-7-(2-fluoroethyl)-1,5,6,7-tetrahydro-4H-pyrrolo[3,2-c]pyridin-4-one	0.831954	0.999871	0.003535	0	0.064884	0	0.473726	0.997619	0	0	0.6	0.30477	0	0	0.380086
(8alpha,10alpha,13alpha,17beta)-17-[(4-hydroxyphenyl)carbonyl]androsta-3,5-diene-3-carboxylic acid	0.087077	0.514394	0.000148	0	0.00122	0	0.323756	0	0	0	0	0.103654	0	0	0.063626
(8E,10S,12Z)-10-hydroxy-6-oxooctadeca-8,12-dienoic acid	0.005726	0.102552	0.001566	0	0.002994	0	0.137391	0	0	0	0	0.003243	0	0	0.003512
(8R,9Z,12Z)-8-hydroxy-6-oxooctadeca-9,12-dienoic acid	0.005726	0.102552	0.001566	0	0.002994	0	0.137391	0	0	0	0	0.003243	0	0	0.003512
(9ALPHA,13BETA,17BETA)-2-[(1Z)-BUT-1-EN-1-YL]ESTRA-1,3,5(10)-TRIENE-3,17-DIOL	0.971079	0.978173	0.993831	1	1	1	0.581598	0.999286	1	1	0.8	0.499476	1	1	0.821462
(9aS)-4-bromo-9a-butyl-7-hydroxy-1,2,9,9a-tetrahydro-3H-fluoren-3-one	0.265184	0.968749	0.002178	0	0	0	0.603848	0	0	0	0.2	0.000233	0	0	0.089198
(9BETA,11ALPHA,13ALPHA,14BETA,17ALPHA)-11-(METHOXYMETHYL)ESTRA-1(10),2,4-TRIENE-3,17-DIOL	0.232634	0.963797	0.290534	1	0.402761	0	0.629708	0	0	1	0.1	0.399001	0	0	0.30739
(9BETA,13ALPHA,14BETA,17ALPHA)-2-METHOXYESTRA-1,3,5(10)-TRIENE-3,17-DIYL DISULFAMATE	0.97162	0.080163	0.999639	1	1	1	0.124021	0.999286	1	1	1	0.996794	1	1	0.989351
(9r,10r)-9-(S-Glutathionyl)-10-Hydroxy-9,10-Dihydrophenanthrene	0.970218	0.304168	0.990196	1	1	1	0.420318	0.999286	1	1	1	0.992793	1	1	0.984402
(9S,10E,12Z)-9-hydroxyoctadeca-10,12-dienoic acid	0.005726	0.102552	0.001566	0	0.002994	0	0.137391	0	0	0	0	0.003243	0	0	0.003512
(9s,10s)-9-(S-Glutathionyl)-10-Hydroxy-9,10-Dihydrophenanthrene	0.973845	0.332407	0.964541	1	1	1	0.442041	0.999286	1	1	1	0.892793	1	1	0.943726
(9S)-9-[(8-AMMONIOOCTYL)AMINO]-1,2,3,4,9,10-HEXAHYDROACRIDINIUM	0.997365	0.375522	0.998594	1	1	1	0.445619	0.999286	1	1	1	0.993723	1	1	0.996561
(9Z,11E,13S)-13-hydroxyoctadeca-9,11-dienoic acid	0.005726	0.102552	0.001566	0	0.002994	0	0.137391	0	0	0	0	0.003243	0	0	0.003512
(Aminooxy)Acetic Acid	0.803781	0.03479	0.997061	1	1	1	0.216947	0.999286	1	1	1	0.897541	1	1	0.899461
(CHLOROACETYL)CARBAMIC ACID (3R,4S,5S,5R)-5-METHOXY-4-[(2R,3R)-2-METHYL-3-(3-METHYL-2-BUTENYL)OXIRANYL]-1-OXASPIRO[2.5]OCT-6-YL ESTER	0.993207	1	0.999447	1	0.989434	1	0.551269	1	1	1	1	1	1	1	0.997551
(Diaminomethyl-Methyl-Amino)-Acetic Acid	0.553765	0.060131	0.993962	1	1	1	0.286314	0.999286	1	1	1	1	1	1	0.849242
(E)-(2r,3r,4s,5r)-3,4,5-Trihydroxy-2-Methoxy-8,8-Dimethyl-Non-6-Enoic Acid ((3s,6r)-6-Hydroxy-2-Oxo-Azepan-3-Yl)-Amide	0.867287	0.03422	0.997868	1	1	1	0.340882	0.999286	1	1	1	0.997541	1	1	0.954232
(E)-[4-(3,5-difluorophenyl)-3H-pyrrolo[2,3-b]pyridin-3-ylidene](3-methoxyphenyl)methanol	0.999863	0.996316	0.999998	1	0.999476	1	0.799696	0.999286	1	1	1	0.999033	1	1	0.999631
(Hydroxyethyloxy)Tri(Ethyloxy)Octane	0.063466	0.162378	6e-05	0	0.4375	0.013889	0.371073	0.020408	0.017143	0	0	0.0021	0.013889	0	0.021875
(Molybdopterin-S,S)-Dioxo-Thio-Molybdenum(V)	0.988875	0.08709	0.999997	1	1	1	0.097572	0.999286	1	1	1	0.996794	1	1	0.995222
(N-{4-[(ETHYLANILINO)SULFONYL]-2-METHYLPHENYL}-3,3,3-TRIFLUORO-2-HYDROXY-2-METHYLPROPANAMIDE	0.9952	1	0.999484	1	0.989434	1	0.541815	1	1	1	1	1	1	1	0.998228
(R,R)-2,3-Butanediol	0.086382	0.688762	0.000903	0	0.069353	0	0.037464	0	0	0	0	0.001014	0	0	0.029433
(R)-1-(4-(4-(HYDROXYMETHYL)-1,3,2-DIOXABOROLAN-2-YL)BENZYL)GUANIDINE	0.030342	0.935858	0.000101	0	0.00122	0	0.632145	0	0	0	0	0.001616	0	0	0.010686
(R)-1-(4-(4-(HYDROXYMETHYL)-1,3,2-DIOXABOROLAN-2-YL)PHENETHYL)GUANIDINE	0.030342	0.935858	0.000101	0	0.00122	0	0.632145	0	0	0	0	0.001616	0	0	0.010686
(R)-1-(4-(4-(HYDROXYMETHYL)-1,3,2-DIOXABOROLAN-2-YL)PHENYL)GUANIDINE	0.9922	0.999956	1	1	0.964299	1	0.88854	0.997619	0.986486	1	1	0.999901	1	1	0.997367
(R)-1-Para-Nitro-Phenyl-2-Azido-Ethanol	0.981947	0.081821	0.999788	1	1	1	0.125926	0.999286	1	1	1	0.996794	1	1	0.992843
(R)-3-BROMO-2-HYDROXY-2-METHYL-N-[4-NITRO-3-(TRIFLUOROMETHYL)PHENYL]PROPANAMIDE	0.799438	0.999876	0.478896	0	0.757728	1	0.903423	0	1	1	0.6	0.799179	1	1	0.692504
(R)-Mesopram	0.97248	0.080932	0.851396	1	1	1	0.137506	0.999286	1	1	1	0.576749	1	1	0.800208
(R)-N-(1-Methyl-Hexyl)-Formamide	0.918946	0.672559	0.999322	1	0.930826	1	0.168801	1	1	1	1	0.999573	1	1	0.972614
(R)-N-(3-Indol-1-Yl-2-Methyl-Propyl)-4-Sulfamoyl-Benzamide	0.96533	0.694746	0.99935	1	0.930826	1	0.161165	1	1	1	1	0.999573	1	1	0.988084
(R)-pyridin-4-yl[4-(2-pyrrolidin-1-ylethoxy)phenyl]methanol	0.988559	0.085109	0.999878	1	1	1	0.128156	0.999286	1	1	1	0.996794	1	1	0.995077
(R)-Rolipram	0.61343	0.168463	0.99525	0	1	1	0.30264	0.999286	1	1	0.9	0.218921	1	1	0.6092
(R)-tacrine(10)-hupyridone	0.997365	0.375522	0.998594	1	1	1	0.445619	0.999286	1	1	1	0.993723	1	1	0.996561
(R)-TRANS-4-(1-AMINOETHYL)-N-(4-PYRIDYL) CYCLOHEXANECARBOXAMIDE	0.031414	0.735588	0.027271	0	0.05	0	0.619311	0	0	0	0	0.092804	0	0	0.050496
(S)-(+)-2-[4-(FLUOROBENZYLOXY-BENZYLAMINO)PROPIONAMIDE]	0.927462	0.143859	0.999998	1	1	1	0.169548	0.999286	1	1	1	0.897851	1	1	0.941771
(S)-1-PHENYL-1-[4-(9H-PURIN-6-YL)PHENYL]METHANAMINE	0.00733	0.104497	0.00248	0	0.026944	0.013889	0.398379	0.020408	0.017143	0	0	0.012804	0.013889	0	0.007538
(S)-2-((S)-3-ISOBUTYL-2,5-DIOXO-4-QUINOLIN-3-YLMETHYL-[1,4]DIAZEPAN-1YL)-N-METHYL-3-NAPHTALEN-2-YL-PROPIONAMIDE	0.00898	0.882288	0.04229	0	0.00122	0	0.619964	0	0	0	0	0.122561	0	0	0.057943
(S)-2-[(R)-3-amino-4-(2-fluorophenyl)butyryl]-1,2,3,4-tetrahydroisoquinoline-3-carboxamide	0.995526	0.557523	1	1	0.75	1	0.776382	0.998502	1	1	1	0.998289	1	1	0.997938
(S)-2-Amino-3-(1,3,5,7-Pentahydro-2,4-Dioxo-Cyclopenta[E]Pyrimidin-1-Yl) Proionic Acid	0.008333	0.122891	0.695847	0	1	1	0.18628	0.999286	1	1	0.4	0.00907	1	0	0.23775
(S)-2-CHLORO-N-(1-(2-(2-HYDROXYETHYLAMINO)-2-OXOETHYL)-2-OXO-1,2,3,4-TETRAHYDROQUINOLIN-3-YL)-6H-THIENO[2,3-B]PYRROLE-5-CARBOXAMIDE	0.996524	1	0.999568	1	0.984724	1	0.545622	0.999265	1	1	1	0.999127	1	1	0.998406
(S)-2-METHYL-1-[(4-METHYL-5-ISOQUINOLINE)SULFONYL]-HOMOPIPERAZINE	0.000115	0.411465	2.3e-05	0	0.436483	0	0.640027	0	0	0	0	0.0013	0	0	0.000479
(S)-3-(4-(2-Carbazol-9-Yl-Ethoxy)-Phenyl)-2-Ethoxy-Propionic Acid	0.005726	0.102552	0.001566	0	0.002994	0	0.137391	0	0	0	0	0.003243	0	0	0.003512
(S)-5-(4-Benzyloxy-Phenyl)-4-(7-Phenyl-Heptanoylamino)-Pentanoic Acid	0.896026	0.03229	0.997908	1	1	1	0.35027	0.999286	1	1	1	0.997541	1	1	0.963825
(S)-ATPA	0.008333	0.122891	0.695847	0	1	1	0.18628	0.999286	1	1	0.4	0.00907	1	0	0.23775
(S)-blebbistatin	0.999885	0.99406	0.999995	1	0.999476	1	0.764111	0.999286	1	1	1	0.999033	1	1	0.999638
(S)-Des-Me-Ampa	0.008333	0.122891	0.695847	0	1	1	0.18628	0.999286	1	1	0.4	0.00907	1	0	0.23775
(S)-Hmg-Coa	0.971796	0.715312	0.999985	1	0.961155	1	0.127673	0.998035	1	1	1	0.999533	1	1	0.990438
(S)-N-(1-(3-CHLORO-4-FLUOROPHENYL)-2-HYDROXYETHYL)-4-(4-(3-CHLOROPHENYL)-1H-PYRAZOL-3-YL)-1H-PYRROLE-2-CARBOXAMIDE	0.998835	0.911077	0.989567	1	0.999476	1	0.496495	0.999286	1	1	1	0.997337	1	1	0.995247
(S)-N-(3-Indol-1-Yl-2-Methyl-Propyl)-4-Sulfamoyl-Benzamide	0.97162	0.080163	0.999639	1	1	1	0.124021	0.999286	1	1	1	0.996794	1	1	0.989351
(S)-N-(4-carbamimidoylbenzyl)-1-(2-(cyclohexylamino)ethanoyl)pyrrolidine-2-carboxamide	0.040718	0.313773	0.000157	0	0.066755	0	0.468795	0.023952	0	0	0	0.003757	0	0	0.014877
(S)-N-(4-carbamimidoylbenzyl)-1-(2-(cyclohexyloxy)ethanoyl)pyrrolidine-2-carboxamide	0.043774	0.691547	7.8e-05	0	0.00122	0	0.442096	0	0	0	0	0.003654	0	0	0.015835
(S)-N-(4-carbamimidoylbenzyl)-1-(2-(cyclopentylamino)ethanoyl)pyrrolidine-2-carboxamide	0.043774	0.691547	7.8e-05	0	0.00122	0	0.442096	0	0	0	0	0.003654	0	0	0.015835
(S)-N-(4-carbamimidoylbenzyl)-1-(2-(cyclopentyloxy)ethanoyl)pyrrolidine-2-carboxamide	0.030046	0.270659	2.8e-05	0	0.03229	0	0.467734	0	0	0	0	0.0013	0	0	0.010458
(S)-N-(4-carbamimidoylbenzyl)-1-(3-cyclohexylpropanoyl)pyrrolidine-2-carboxamide	0.043774	0.691547	7.8e-05	0	0.00122	0	0.442096	0	0	0	0	0.003654	0	0	0.015835
(S)-N-(4-carbamimidoylbenzyl)-1-(3-cyclopentylpropanoyl)pyrrolidine-2-carboxamide	0.040718	0.313773	0.000157	0	0.066755	0	0.468795	0.023952	0	0	0	0.003757	0	0	0.014877
(S)-Rolipram	0.61343	0.168463	0.99525	0	1	1	0.30264	0.999286	1	1	0.9	0.218921	1	1	0.6092
(S)-tacrine(10)-hupyridone	0.997365	0.375522	0.998594	1	1	1	0.445619	0.999286	1	1	1	0.993723	1	1	0.996561
(S)-Wiskostatin	0.734077	0.977353	0.998851	1	0.737864	1	0.570493	1	0.990291	1	1	0.902143	1	1	0.878357
(Tert-Butyloxycarbonyl)-Alanyl-Alanyl-Amine	0.119991	0.438468	9.1e-05	0	0.00122	0	0.37844	0	0	0	0	0.003654	0	0	0.041245
(TERT-BUTYLOXYCARBONYL)-ALANYL-AMINO ETHYL-FORMAMIDE	0.119991	0.438468	9.1e-05	0	0.00122	0	0.37844	0	0	0	0	0.003654	0	0	0.041245
(Z,Z)-4-Hydroxy-N,N,N-Trimethyl-10-Oxo-7-[(1-Oxo-9-Octadecenyl)Oxy]-3,5,9-Trioxa-4-Phosphaheptacos-18-En-1-Aminium-4-Oxide	0.99027	0.127409	0.999998	1	1	1	0.078341	0.999286	1	1	1	0.995176	1	1	0.995148
(Z)-2-[2-(4-methylpiperazin-1-yl)benzyl]diazenecarbothioamide	0.743724	0.45053	0.998806	1	0.981132	1	0.368621	0.999286	1	1	1	0.28618	1	1	0.676237
(Z)-3-BENZYL-5-(2-HYDROXY-3-NITROBENZYLIDENE)-2-THIOXOTHIAZOLIDIN-4-ONE	0.201789	0.100888	0.001143	0	0	0	0.135976	0	0	0	0	0.002044	0	0	0.068325
[(1-{2[(4-Carbamimidoyl-Phenylamino)-Methyl]-1-Methyl-1h-Benzoimidazol-5-Yl}-Cyclopropyl)-Pyridin-2-Yl-Methyleneaminooxy]-Acetic Acid Ethyl Ester	0.064259	0.326457	8.4e-05	0	0.00122	0	0.294827	0	0	0	0	0.003654	0	0	0.022665
[(1e)-4-Phenylbut-1-Enyl]Benzene	0.927462	0.143859	0.999998	1	1	1	0.169548	0.999286	1	1	1	0.897851	1	1	0.941771
[(1S)-1-(5-CHLORO-1-BENZOTHIEN-3-YL)-2-(2-NAPHTHYLAMINO)-2-OXOETHYL]PHOSPHONIC ACID	0.064259	0.326457	8.4e-05	0	0.00122	0	0.294827	0	0	0	0	0.003654	0	0	0.022665
[(2r,3s,4s,5r)-3,4,5-Trihydroxytetrahydrofuran-2-Yl]Methyl Dihydrogen Phosphate	0.945034	0.272911	0.999998	1	1	1	0.032478	0	1	1	0.9	0.995176	1	1	0.980069
[(3,7,11-TRIMETHYL-DODECA-2,6,10-TRIENYLOXYCARBAMOYL)-METHYL]-PHOSPHONIC ACID	0.024151	0.199085	6.6e-05	0	0.4375	0.013889	0.433575	0.020408	0.017143	0	0	0.0021	0.013889	0	0.008772
[(3R)-7-NITRO-1,2,3,4-TETRAHYDROISOQUINOLIN-3-YL]METHANOL	0.970313	0.202819	0.999998	1	1	1	0.060218	0.999286	1	1	1	0.995176	1	1	0.988496
[(4-{4-[4-(Difluoro-Phosphono-Methyl)-Phenyl]-Butyl}-Phenyl)-Difluoro-Methyl]-Phosphonic Acid	0.002201	0.146379	3.2e-05	0	0.03229	0	0.479849	0	0	0	0	0.0013	0	0	0.001178
[(4R)-4-(3-HYDROXYPHENYL)-1,6-DIMETHYL-2-THIOXO-1,2,3,4-TETRAHYDROPYRIMIDIN-5-YL](PHENYL)METHANONE	0.999993	0.948907	0.997491	1	0.5	0	0.484505	0.999286	0	0	0.5	0.899033	0	1	0.965506
[[1-[N-HYDROXY-ACETAMIDYL]-3-METHYL-BUTYL]-CARBONYL-LEUCINYL]-ALANINE ETHYL ESTER	0.998934	0.969613	0.999995	1	0.974505	0.989011	0.603369	0.999206	1	1	1	0.989785	0.989011	1	0.996238
[[4-(Aminomethyl)Phenyl]Amino]Oxo-Acetic Acid,	0.345266	0.500198	0.001558	0	0.00122	0	0.419822	0	0	0	0	0.0021	0	0	0.116308
[[CYCLOHEXANESULFONYL-GLYCYL]-3[PYRIDIN-4-YL-AMINOMETHYL]ALANYL]PIPERIDINE	0.999935	0.99999	0.999539	1	0.97412	1	0.974446	0.999238	1	1	1	0.997747	1	1	0.999074
[{2-bromo-4-[(2R)-3-oxo-2,3-diphenylpropyl]phenyl}(difluoro)methyl]phosphonic acid	0.345266	0.500198	0.001558	0	0.00122	0	0.419822	0	0	0	0	0.0021	0	0	0.116308
[1-(1-Benzyl-3-Hydroxy-2-Oxo-Propylcarbamoyl)-2-Phenyl-Ethyl]-Carbamic Acid Benzyl Ester	0.999235	0.438986	0.999995	1	1	1	0.468041	0.999286	1	1	1	0.995027	1	1	0.998086
[1-(1-Methyl-4,5-Dioxo-Pent-2-Enylcarbamoyl)-2-Phenyl-Ethyl]-Carbamic Acid Benzyl Ester	0.999235	0.438986	0.999995	1	1	1	0.468041	0.999286	1	1	1	0.995027	1	1	0.998086
[1-(3-CHLORO-2-FORMYL-PHENYLCARBAMOYL)-2-METHYL-PROPYL]-CARBAMIC ACID TERT-BUTYL ESTER	0.119991	0.438468	9.1e-05	0	0.00122	0	0.37844	0	0	0	0	0.003654	0	0	0.041245
[1-(4-Fluorobenzyl)Cyclobutyl]Methyl (1s)-1-[Oxo(1h-Pyrazol-5-Ylamino)Acetyl]Pentylcarbamate	0.999957	0.876216	0.999814	1	0.931818	1	0.547572	0.997706	1	1	1	0.994444	1	1	0.998072
[1-(6-{6-[(1-methylethyl)amino]-1H-indazol-1-yl}pyrazin-2-yl)-1H-pyrrol-3-yl]acetic acid	0.531163	0.672941	0.000264	0	0.03229	0	0.404244	0	0	0	0	0.30082	0	0	0.277416
[2-(3-DIBENZOFURAN-4-YL-PHENYL)-1-HYDROXY-1-PHOSPHONO-ETHYL]-PHOSPHONIC ACID	0.364388	0.101783	0.731516	0	1	1	0.316707	0.999286	1	1	1	0.201633	1	1	0.432512
[2-(5-MERCAPTO-[1,3,4]THIADIAZOL-2-YLCARBAMOYL)-1-PHENYL-ETHYL]-CARBAMIC ACID BENZYL ESTER	0.999569	0.970649	0.99988	1	0.971491	1	0.473354	0.999123	0.991379	1	1	0.995953	1	1	0.998467
[2-Amino-6-(2,6-Difluoro-Benzoyl)-Imidazo[1,2-a]Pyridin-3-Yl]-Phenyl-Methanone	0.999975	0.934425	0.998387	1	0.999476	1	0.566291	0.999286	1	1	1	0.999033	1	1	0.999132
[2,4,6-Triisopropyl-Phenylsulfonyl-L-[3-Amidino-Phenylalanine]]-Piperazine-N'-Beta-Alanine	0.020882	0.792886	0.00082	0	0.001865	0	0.686561	0	0	0	0	0.003293	0	0	0.008332
[2'-CARBOXYLETHYL]-10-METHYL-ANTHRACENE ENDOPEROXIDE	0.312634	0.902311	0.002983	0	0.00122	0	0.498195	0	0	0	0	0.103243	0	0	0.13962
[2'-HYDROXY-3'-(1H-PYRROLO[3,2-C]PYRIDIN-2-YL)-BIPHENYL-3-YLMETHYL]-UREA	0.080603	0.866466	0.000199	0	0.00122	0	0.481296	0	0	0	0	0.002777	0	0	0.027859
[2(R,S)-2-Sulfanylheptanoyl]-Phe-Ala	0.956888	0.99953	0.99637	1	0.971101	0.996753	0.12752	0.999325	0.996753	1	1	0.99875	0.996753	1	0.984003
[3-(1-Benzyl-3-Carbamoylmethyl-2-Methyl-1h-Indol-5-Yloxy)-Propyl-]-Phosphonic Acid	0.896026	0.03229	0.997908	1	1	1	0.35027	0.999286	1	1	1	0.997541	1	1	0.963825
[3-(1,3,2-Dioxaborolan-2-Yloxy)Propyl]Guanidine	0.064259	0.326457	8.4e-05	0	0.00122	0	0.294827	0	0	0	0	0.003654	0	0	0.022665
[3-(Dodecanoylamino)Propyl](Hydroxy)Dimethylammonium	0.010983	0.123417	0.000209	0	0.002994	0	0.195019	0	0	0	0	0.003654	0	0	0.004949
[3,5-Dibromo-4-(4-Hydroxy-3-Phenethylcarbamoyl-Phenoxy)-Phenyl]-Acetic Acid	0.005726	0.102552	0.001566	0	0.002994	0	0.137391	0	0	0	0	0.003243	0	0	0.003512
[4-({[5-Benzyloxy-1-(3-Carbamimidoyl-Benzyl)-1h-Indole-2-Carbonyl]-Amino}-Methyl)-Phenyl]-Trimethyl-Ammonium	0.000364	0.082822	2.1e-05	0	0.03229	0	0.300039	0	0	0	0	0.0013	0	0	0.000561
[4-({4-[(5-cyclopropyl-1H-pyrazol-3-yl)amino]-6-(methylamino)pyrimidin-2-yl}amino)phenyl]acetonitrile	0.999928	0.995426	0.999986	1	0.999476	1	0.736927	0.999286	1	1	1	0.999033	1	1	0.999649
[4-({4-[(5-cyclopropyl-1H-pyrazol-3-yl)amino]quinazolin-2-yl}amino)phenyl]acetonitrile	1	0.99994	0.999951	1	0.974114	1	0.751788	0.999246	1	1	1	0.999795	1	1	0.999915
[4-({4-[(5-CYCLOPROPYL-1H-PYRAZOL-3-YL)AMINO]QUINAZOLIN-2-YL}IMINO)CYCLOHEXA-2,5-DIEN-1-YL]ACETONITRILE	1	0.979651	0.999955	1	0.999476	1	0.673921	0.999286	1	1	1	0.999033	1	1	0.999663
[4-({5-(AMINOCARBONYL)-4-[(3-METHYLPHENYL)AMINO]PYRIMIDIN-2-YL}AMINO)PHENYL]ACETIC ACID	1	0.980097	0.999873	1	0.999476	1	0.637967	0.999286	1	1	1	0.999033	1	1	0.999635
[4-(1,3,2-Dioxaborolan-2-Yloxy)Methyl]Benzamidine	0.064259	0.326457	8.4e-05	0	0.00122	0	0.294827	0	0	0	0	0.003654	0	0	0.022665
[4-(2-Amino-4-Methyl-Thiazol-5-Yl)-Pyrimidin-2-Yl]-(3-Nitro-Phenyl)-Amine	0.011665	0.235699	0.000123	0	0.001865	0	0.593937	0	0	0	0	0.0013	0	0	0.004363
[4-(4-ACETYLAMINO-PHENYL)-3,5-DIOXO-4-AZA-TRICYCLO[5.2.2.0 2,6]UNDEC-1-YLCARBAMOYLOXY]-ACETIC ACID	0.090329	0.863873	0.000119	0	0.00122	0	0.481391	0	0	0	0	0.003654	0	0	0.031367
[4-(4-Hydroxy-3-Iodo-Phenoxy)-3,5-Diiodo-Phenyl]-Acetic Acid	0.005726	0.102552	0.001566	0	0.002994	0	0.137391	0	0	0	0	0.003243	0	0	0.003512
[4-(4-PHENYL-PIPERIDIN-1-YL)-BENZENESULFONYLAMINO]-ACETIC ACID	0.999569	0.970649	0.99988	1	0.971491	1	0.473354	0.999123	0.991379	1	1	0.995953	1	1	0.998467
[4-(5-naphthalen-2-yl-1H-pyrrolo[2,3-b]pyridin-3-yl)phenyl]acetic acid	0.997467	0.949288	0.999046	1	0.966712	1	0.660904	1	1	1	1	0.998577	1	1	0.998363
[4-(6-Chloro-Naphthalene-2-Sulfonyl)-Piperazin-1-Yl]-(3,4,5,6-Tetrahydro-2h-[1,4']Bipyridinyl-4-Yl)-Methanone	0.064259	0.326457	8.4e-05	0	0.00122	0	0.294827	0	0	0	0	0.003654	0	0	0.022665
[4-amino-2-(tert-butylamino)-1,3-thiazol-5-yl](phenyl)methanone	0.997503	0.895755	0.972235	1	0.966712	1	0.531624	1	1	1	1	0.999213	1	1	0.98965
[5-AMINO-1-(4-FLUOROPHENYL)-1H-PYRAZOL-4-YL](3-{[(2R)-2,3-DIHYDROXYPROPYL]OXY}PHENYL)METHANONE	0.999188	0.918861	0.988453	1	0.999476	1	0.519919	0.999286	1	1	1	0.977004	1	1	0.988215
[5-AMINO-1-(4-FLUOROPHENYL)-1H-PYRAZOL-4-YL][3-(PIPERIDIN-4-YLOXY)PHENYL]METHANONE	0.999188	0.918861	0.988453	1	0.999476	1	0.519919	0.999286	1	1	1	0.977004	1	1	0.988215
[5-HYDROXY-2-(4-HYDROXYPHENYL)-1-BENZOFURAN-7-YL]ACETONITRILE	0.603301	0.976539	0.762239	0	0	0	0.596732	0	0	0	0.1	0.299476	0	1	0.555005
[N-(2,4-DIAMINOPTERIDIN-6-YL)-METHYL]-DIBENZ[B,F]AZEPINE	0.991799	1	1	1	0.972677	0.995074	0.194858	0.999284	0.995074	1	1	1	0.995074	1	0.997266
[N-(3-DIBENZYLCARBAMOYL-OXIRANECARBONYL)-HYDRAZINO]-ACETIC ACID	0.986005	0.082411	0.999984	1	1	1	0.116636	0.999286	1	1	1	0.996794	1	1	0.994261
[N-(BENZYLOXYCARBONYL)AMINO](4-AMIDINOPHENYL)METHANE-PHOSPHONATE	0.000364	0.082822	2.1e-05	0	0.03229	0	0.300039	0	0	0	0	0.0013	0	0	0.000561
[PHENYLALANINYL-PROLINYL]-[2-(PYRIDIN-4-YLAMINO)-ETHYL]-AMINE	0.037105	0.999924	0.005097	0	0.110053	0.008746	0.888787	0.011905	0.008746	0	0	0.006046	0.008746	0	0.016083
{(2S)-1-[N-(tert-butoxycarbonyl)glycyl]pyrrolidin-2-yl}methyl (3-chlorophenyl)acetate	0.037105	0.999924	0.005097	0	0.110053	0.008746	0.888787	0.011905	0.008746	0	0	0.006046	0.008746	0	0.016083
{(2Z)-3-[(6-chloropyridin-3-yl)methyl]-1,3-thiazolidin-2-ylidene}cyanamide	0.008155	0.097849	0.000224	0	0	0	0.155097	0	0	0	0	0.003243	0	0	0.003874
{(2Z)-4-AMINO-2-[(4-METHOXYPHENYL)IMINO]-2,3-DIHYDRO-1,3-THIAZOL-5-YL}(4-METHOXYPHENYL)METHANONE	0.936294	0.834539	0.767425	1	0.5	0	0.402039	0.999286	0	0	0	0.204561	0	1	0.636093
{[(2,6-difluorophenyl)carbonyl]amino}-N-(4-fluorophenyl)-1H-pyrazole-3-carboxamide	0.999419	0.915219	0.996361	1	0.966712	1	0.548806	1	1	1	1	0.999213	1	1	0.998331
{[2-(1h-1,2,3-Benzotriazol-1-Yl)-2-(3,4-Difluorophenyl)Propane-1,3-Diyl]Bis[4,1-Phenylene(Difluoromethylene)]}Bis(Phosphonic Acid)	0.345266	0.500198	0.001558	0	0.00122	0	0.419822	0	0	0	0	0.0021	0	0	0.116308
{[4-AMINO-2-(3-CHLOROANILINO)-1,3-THIAZOL-5-YL](4-FLUOROPHENYL)METHANONE	0.936294	0.834539	0.767425	1	0.5	0	0.402039	0.999286	0	0	0	0.204561	0	1	0.636093
{[5-(5-NITRO-2-FURYL)-1,3,4-OXADIAZOL-2-YL]THIO}ACETIC ACID	0.905185	0.026104	0.997963	1	1	1	0.380321	0.999286	1	1	1	0.997541	1	1	0.966896
{[7-(Difluoro-Phosphono-Methyl)-Naphthalen-2-Yl]-Difluoro-Methyl}-Phosphonic Acid	0.345266	0.500198	0.001558	0	0.00122	0	0.419822	0	0	0	0	0.0021	0	0	0.116308
{3-[(4,5,7-TRIFLUORO-1,3-BENZOTHIAZOL-2-YL)METHYL]-1H-INDOL-1-YL}ACETIC ACID	0.905185	0.026104	0.997963	1	1	1	0.380321	0.999286	1	1	1	0.997541	1	1	0.966896
{3-[(5-CHLORO-1,3-BENZOTHIAZOL-2-YL)METHYL]-2,4-DIOXO-3,4-DIHYDROPYRIMIDIN-1(2H)-YL}ACETIC ACID	0.905185	0.026104	0.997963	1	1	1	0.380321	0.999286	1	1	1	0.997541	1	1	0.966896
{3-[3-(3,4-Dimethoxy-Phenyl)-1-(1-{1-[2-(3,4,5-Trimethoxy-Phenyl)-Butyryl]-Piperidin-2yl}-Vinyloxy)-Propyl]-Phenoxy}-Acetic Acid	0.576209	0.150436	0.999998	0	1	1	0.179928	0.999286	1	1	0.9	0.896858	1	1	0.824355
{4-[(2R)-pyrrolidin-2-ylmethoxy]phenyl}(4-thiophen-3-ylphenyl)methanone	0.988559	0.085109	0.999878	1	1	1	0.128156	0.999286	1	1	1	0.996794	1	1	0.995077
{4-[(2s,4e)-2-(1,3-Benzothiazol-2-Yl)-2-(1h-1,2,3-Benzotriazol-1-Yl)-5-Phenylpent-4-Enyl]Phenyl}(Difluoro)Methylphosphonic Acid	0.002201	0.146379	3.2e-05	0	0.03229	0	0.479849	0	0	0	0	0.0013	0	0	0.001178
{4-[(CARBOXYMETHOXY)CARBONYL]-3,3-DIOXIDO-1-OXONAPHTHO[1,2-D]ISOTHIAZOL-2(1H)-YL}ACETIC ACID	0.905185	0.026104	0.997963	1	1	1	0.380321	0.999286	1	1	1	0.997541	1	1	0.966896
{4-[2-Acetylamino-2-(3-Carbamoyl-2-Cyclohexylmethoxy-6,7,8,9-Tetrahydro-5h-Benzocyclohepten-5ylcarbamoyl)-Ethyl]-2-Phosphono-Phenyl}-Phosphonic Acid	1	0.984303	0.999943	1	0.999476	1	0.711016	0.999286	1	1	1	0.999033	1	1	0.999659
{4-[2-BENZYL-3-METHOXY-2-(METHOXYCARBONYL)-3-OXOPROPYL]PHENYL}SULFAMIC ACID	0.991996	0.964113	0.212045	1	0.5	0	0.608034	0.999286	0	0	0.4	0.499942	0	1	0.567994
{4-[2,2-BIS(5-METHYL-1,2,4-OXADIAZOL-3-YL)-3-PHENYLPROPYL]PHENYL}SULFAMIC ACID	0.991996	0.964113	0.212045	1	0.5	0	0.608034	0.999286	0	0	0.4	0.499942	0	1	0.567994
{4-[3-(4-acetyl-3-hydroxy-2-propylphenoxy)propoxy]phenoxy}acetic acid	0.005726	0.102552	0.001566	0	0.002994	0	0.137391	0	0	0	0	0.003243	0	0	0.003512
{4-[3-(6,7-Diethoxy-Quinazolin-4-Ylamino)-Phenyl]-Thiazol-2-Yl}-Methanol	0.201789	0.100888	0.001143	0	0	0	0.135976	0	0	0	0	0.002044	0	0	0.068325
{4-[4-hydroxy-3-(1-methylethyl)benzyl]-3,5-dimethylphenoxy}acetic acid	0.005726	0.102552	0.001566	0	0.002994	0	0.137391	0	0	0	0	0.003243	0	0	0.003512
{5-(5-AMINO-1H-PYRROLO[3,2-B]PYRIDIN-2-YL)-6-HYDROXY-3'-NITRO-BIPHENYL-3-YL]-ACETIC ACID	0.080603	0.866466	0.000199	0	0.00122	0	0.481296	0	0	0	0	0.002777	0	0	0.027859
+/-METHYL 4-(AMINOIMINOMETHYL)-BETA-[3- INH (AMINOIMINO)PHENYL]BENZENE PENTANOATE	0.000364	0.082822	2.1e-05	0	0.03229	0	0.300039	0	0	0	0	0.0013	0	0	0.000561
1-((1R,2S)-1-{2-[2-(4-CHLOROPHENYL)-1,3-BENZOXAZOL-7-YL]ETHYL}-2-HYDROXYPROPYL)-1H-IMIDAZOLE-4-CARBOXAMIDE	0.239134	0.999998	0.000265	1	0.98	1	0.612464	0.066667	0.111111	1	0.8	0.6	1	0	0.2798
1-((1R)-1-(HYDROXYMETHYL)-3-{6-[(3-PHENYLPROPANOYL)AMINO]-1H-INDOL-1-YL}PROPYL)-1H-IMIDAZOLE-4-CARBOXAMIDE	0.239134	0.999998	0.000265	1	0.98	1	0.612464	0.066667	0.111111	1	0.8	0.6	1	0	0.2798
1-((2-HYDROXYETHOXY)METHYL)-5-BENZYLPYRIMIDINE-2,4(1H,3H)-DIONE	0.201789	0.100888	0.001143	0	0	0	0.135976	0	0	0	0	0.002044	0	0	0.068325
1-({2-[2-(4-CHLOROPHENYL)ETHYL]-1,3-DIOXOLAN-2-YL}METHYL)-1H-IMIDAZOLE	0.996338	1	0.999484	1	0.989434	1	0.379816	1	1	1	1	1	1	1	0.998607
1-(1-methylethyl)-3-quinolin-6-yl-1H-pyrazolo[3,4-d]pyrimidin-4-amine	1	0.99994	0.999951	1	0.974114	1	0.751788	0.999246	1	1	1	0.999795	1	1	0.999915
1-(1-phenylcyclopentyl)methylamine	0.997123	0.813994	0.999671	1	0.930433	1	0.668199	0.999292	1	1	1	0.681909	1	1	0.892901
1-(2-{[(6-AMINO-2-METHYLPYRIDIN-3-YL)METHYL]AMINO}ETHYL)-6-CHLORO-3-[(2,2-DIFLUORO-2-PYRIDIN-2-YLETHYL)AMINO]-1,4-DIHYDROPYRAZIN-2-OL	0.999935	0.99999	0.999539	1	0.97412	1	0.974446	0.999238	1	1	1	0.997747	1	1	0.999074
1-(2-Amidinophenyl)-3-(Phenoxyphenyl)Urea	0.000364	0.082822	2.1e-05	0	0.03229	0	0.300039	0	0	0	0	0.0013	0	0	0.000561
1-(2-Chlorophenyl)-3,5-Dimethyl-1h-Pyrazole-4-Carboxylic Acid Ethyl Ester	0.97248	0.080932	0.851396	1	1	1	0.137506	0.999286	1	1	1	0.576749	1	1	0.800208
1-(2-Deoxy-2-Fluoro-3-O-Phosphono-Beta-L-Ribofuranosyl)Pyrimidine-2,4(1h,3h)-Dione	0.845504	0.038969	0.997951	1	1	1	0.469126	0.999286	1	1	1	0.997541	1	1	0.946999
1-(2-Fluorobenzyl)-3-Butyl-8-(N-Acetyl-4-Aminobenzyl)-Xanthine	0.201789	0.100888	0.001143	0	0	0	0.135976	0	0	0	0	0.002044	0	0	0.068325
1-(2-Methoxy-Ethoxy)-2-{2-[2-(2-Methoxy-Ethoxy]-Ethoxy}-Ethane	0.373377	0.079794	0.89779	1	1	1	0.245342	0.999286	1	1	0.7	0.856144	1	1	0.709103
1-(2-nitrophenyl)-2,2,2-trifluoroethyl]-arsenocholine	0.997365	0.375522	0.998594	1	1	1	0.445619	0.999286	1	1	1	0.993723	1	1	0.996561
1-(2,2'-bithiophen-5-yl)methanamine	0.988559	0.085109	0.999878	1	1	1	0.128156	0.999286	1	1	1	0.996794	1	1	0.995077
1-(2,3-dihydro-1,4-benzodioxin-6-ylsulfonyl)-4-[(4-methoxyphenyl)sulfonyl]piperazine	0.201789	0.100888	0.001143	0	0	0	0.135976	0	0	0	0	0.002044	0	0	0.068325
1-(2,5-dideoxy-5-pyrrolidin-1-yl-beta-L-erythro-pentofuranosyl)-5-methylpyrimidine-2,4(1H,3H)-dione	0.962752	1	0.9909	1	0.952471	1	0.725315	0.999283	1	1	1	0.99919	1	1	0.984281
1-(2,6-Dichlorophenyl)-5-(2,4-Difluorophenyl)-7-Piperazin-1-Yl-3,4-Dihydroquinazolin-2(1h)-One	0.999188	0.918861	0.988453	1	0.999476	1	0.519919	0.999286	1	1	1	0.977004	1	1	0.988215
1-(2,6-Dichlorophenyl)-5-(2,4-Difluorophenyl)-7-Piperidin-4-Yl-3,4-Dihydroquinolin-2(1h)-One	0.989679	0.876353	0.874649	1	0.988155	1	0.509023	1	1	1	1	0.899637	1	1	0.921322
1-(3-(2,4-DIMETHYLTHIAZOL-5-YL)-4-OXO-2,4-DIHYDROINDENO[1,2-C]PYRAZOL-5-YL)-3-(4-METHYLPIPERAZIN-1-YL)UREA	0.999975	0.934425	0.998387	1	0.999476	1	0.566291	0.999286	1	1	1	0.999033	1	1	0.999132
1-(3-BROMOPHENYL)-7-CHLORO-6-METHOXY-3,4-DIHYDROISOQUINOLINE	0.998372	0.908707	0.9851	1	0.999476	1	0.495373	0.999286	1	1	1	0.898481	1	1	0.960651
1-(3-chlorophenyl)-3-{5-[2-(thieno[3,2-d]pyrimidin-4-ylamino)ethyl]-1,3-thiazol-2-yl}urea	1	0.999961	0.999156	1	0.982856	1	0.584027	0.999287	1	1	1	1	1	1	0.999719
1-(3-HYDROXYPROPYL)-2-[(3-NITROBENZOYL)AMINO]-1H-BENZIMIDAZOL-5-YL PIVALATE	0.994073	0.89611	0.856	1	0.5	0	0.467493	0.999286	0	0	0.4	0.598896	0	1	0.816323
1-(3-Mercapto-2-Methyl-Propionyl)-Pyrrolidine-2-Carboxylic Acid	0.106438	0	0	0	0.572581	1	0	0.998585	1	0	1	0.004888	1	0	0.037109
1-(3-O-Phosphono-Beta-L-Arabinofuranosyl)Pyrimidine-2,4(1h,3h)-Dione	0.845504	0.038969	0.997951	1	1	1	0.469126	0.999286	1	1	1	0.997541	1	1	0.946999
1-(3,5-DICHLOROPHENYL)-5-METHYL-1H-1,2,4-TRIAZOLE-3-CARBOXYLIC ACID	0.013396	0.687792	9.2e-05	0	0.00122	0	0.499805	0	0	0	0	0.0021	0	0	0.005196
1-(4-Amidinophenyl)-3-(4-Chlorophenyl)Urea	0.064259	0.326457	8.4e-05	0	0.00122	0	0.294827	0	0	0	0	0.003654	0	0	0.022665
1-(4-Aminophenyl)-3,5-Dimethyl-1h-Pyrazole-4-Carboxylic Acid Ethyl Ester	0.99342	0.452086	0.999749	1	1	1	0.496969	0.999286	1	1	1	0.995551	1	1	0.99624
1-(4-fluorophenyl)-N-[3-fluoro-4-(1H-pyrrolo[2,3-b]pyridin-4-yloxy)phenyl]-2-oxo-1,2-dihydropyridine-3-carboxamide	0.992138	0.999968	0.99578	1	0.995363	1	0.890498	0.999152	1	1	1	0.999306	1	1	0.995741
1-(4-HEXYLPHENYL)PROP-2-EN-1-ONE	0.005726	0.102552	0.001566	0	0.002994	0	0.137391	0	0	0	0	0.003243	0	0	0.003512
1-(4-IODOBENZOYL)-5-METHOXY-2-METHYL INDOLE-3-ACETIC ACID	0.012883	0.894923	0.009021	0	0.00122	0	0.49062	0	0	0	0	0.001633	0	0	0.007846
1-(4-Methoxyphenyl)-3,5-Dimethyl-1h-Pyrazole-4-Carboxylic Acid Ethyl Ester	0.999807	0.847685	0.999975	1	0.939789	1	0.719023	1	1	1	1	0.997794	1	1	0.999192
1-(4-Tert-Butylcarbamoyl-Piperazine-1-Carbonyl)-3-(3-Guanidino-Propyl)-4-Oxo-Azetidine-2-Carboxylic Acid	0.064259	0.326457	8.4e-05	0	0.00122	0	0.294827	0	0	0	0	0.003654	0	0	0.022665
1-(4-thiophen-2-ylphenyl)methanamine	0.988559	0.085109	0.999878	1	1	1	0.128156	0.999286	1	1	1	0.996794	1	1	0.995077
1-(5-{2-[(1-methyl-1H-pyrazolo[4,3-d]pyrimidin-7-yl)amino]ethyl}-1,3-thiazol-2-yl)-3-[3-(trifluoromethyl)phenyl]urea	1	0.999961	0.999156	1	0.982856	1	0.584027	0.999287	1	1	1	1	1	1	0.999719
1-(5-CHLORO-2-METHOXYPHENYL)-3-{6-[2-(DIMETHYLAMINO)-1-METHYLETHOXY]PYRAZIN-2-YL}UREA	0.999792	0.927125	0.994791	1	0.999476	1	0.544563	0.999286	1	1	1	0.999033	1	1	0.997872
1-(5-CHLORO-2,4-DIMETHOXYPHENYL)-3-(5-CYANOPYRAZIN-2-YL)UREA	0.999792	0.927125	0.994791	1	0.999476	1	0.544563	0.999286	1	1	1	0.999033	1	1	0.997872
1-(5-ISOQUINOLINESULFONYL)-2-METHYLPIPERAZINE	0.00733	0.104497	0.00248	0	0.026944	0.013889	0.398379	0.020408	0.017143	0	0	0.012804	0.013889	0	0.007538
1-(5-OXO-2,3,5,9B-TETRAHYDRO-1H-PYRROLO[2,1-A]ISOINDOL-9-YL)-3-(5-PYRROLIDIN-2-YL-1H-PYRAZOL-3-YL)-UREA	0.999975	0.934425	0.998387	1	0.999476	1	0.566291	0.999286	1	1	1	0.999033	1	1	0.999132
1-(5-Tert-Butyl-2-Methyl-2h-Pyrazol-3-Yl)-3-(4-Chloro-Phenyl)-Urea	0.999188	0.918861	0.988453	1	0.999476	1	0.519919	0.999286	1	1	1	0.977004	1	1	0.988215
1-(6-CYANO-3-PYRIDYLCARBONYL)-5',8'-DIFLUOROSPIRO[PIPERIDINE-4,2'(1'H)-QUINAZOLINE]-4'-AMINE	0.981515	0.09804	0.999998	1	1	1	0.096799	0.999286	1	1	1	0.995176	1	1	0.99223
1-(9-ethyl-9H-carbazol-3-yl)-N-methylmethanamine	0.373377	0.079794	0.89779	1	1	1	0.245342	0.999286	1	1	0.7	0.856144	1	1	0.709103
1-(adamantan-1-yl)-2-(1H-imidazol-1-yl)ethanone	0.201789	0.100888	0.001143	0	0	0	0.135976	0	0	0	0	0.002044	0	0	0.068325
1-(biphenyl-4-ylmethyl)-1H-imidazole	0.000258	0.126312	0.00011	0	0.002994	0	0.203996	0	0	0	0	0.003654	0	0	0.001341
1-(CYCLOHEXYLAMINO)-3-(6-METHYL-3,4-DIHYDRO-1H-CARBAZOL-9(2H)-YL)PROPAN-2-OL	0.996338	1	0.999484	1	0.989434	1	0.379816	1	1	1	1	1	1	1	0.998607
1-(DIMETHYLAMINO)-3-(4-{{4-(2-METHYLIMIDAZO[1,2-A]PYRIDIN-3-YL)PYRIMIDIN-2-YL]AMINO}PHENOXY)PROPAN-2-OL	0.999419	0.915219	0.996361	1	0.966712	1	0.548806	1	1	1	1	0.999213	1	1	0.998331
1-(HYDROXYMETHYLENEAMINO)-8-HYDROXY-OCTANE	0.999935	0.99999	0.999539	1	0.97412	1	0.974446	0.999238	1	1	1	0.997747	1	1	0.999074
1-(PHENYLMETHYL)CYCLOPENTYL[(1S)-1-FORMYLPENTYL]CARBAMATE	0.999957	0.876216	0.999814	1	0.931818	1	0.547572	0.997706	1	1	1	0.994444	1	1	0.998072
1-[(2-Amino-6,9-Dihydro-1h-Purin-6-Yl)Oxy]-3-Methyl-2-Butanol	0.999975	0.934425	0.998387	1	0.999476	1	0.566291	0.999286	1	1	1	0.999033	1	1	0.999132
1-[(2-NITROPHENYL)SULFONYL]-1H-PYRROLO[3,2-B]PYRIDINE-6-CARBOXAMIDE	0.869795	0.948516	0.055876	0	0.277648	0	0.537607	0	0.030303	0	0.1	0	0	0	0.308557
1-[(2,6-difluorophenyl)sulfonyl]-4-(2,3-dihydro-1,4-benzodioxin-6-ylsulfonyl)piperazine	0.201789	0.100888	0.001143	0	0	0	0.135976	0	0	0	0	0.002044	0	0	0.068325
1-[(2R)-2-aminobutanoyl]-N-(3-chlorobenzyl)-L-prolinamide	0.999935	0.99999	0.999539	1	0.97412	1	0.974446	0.999238	1	1	1	0.997747	1	1	0.999074
1-[(2R)-2-aminobutanoyl]-N-(4-carbamimidoylbenzyl)-L-prolinamide	0.999935	0.99999	0.999539	1	0.97412	1	0.974446	0.999238	1	1	1	0.997747	1	1	0.999074
1-[(2S)-2-[(4-CHLOROBENZYL)OXY]-2-(2,4-DICHLOROPHENYL)ETHYL]-1H-IMIDAZOLE	6.4e-05	0.04702	2.7e-05	0	0.039259	0	0.176322	0	0	0	0	0.000388	0	0	0.00016
1-[(2S)-4-(5-BROMO-1H-PYRAZOLO[3,4-B]PYRIDIN-4-YL)MORPHOLIN-2-YL]METHANAMINE	0.999792	0.927125	0.994791	1	0.999476	1	0.544563	0.999286	1	1	1	0.999033	1	1	0.997872
1-[(2S)-4-(5-phenyl-1H-pyrazolo[3,4-b]pyridin-4-yl)morpholin-2-yl]methanamine	0.99688	0.876041	0.989718	1	0.912696	1	0.5431	0.999283	1	1	1	0.999876	1	1	0.995491
1-[[(1E)-2-(4-CHLOROPHENYL)ETHENYL]SULFONYL]-4-[[1-(4-PYRIDINYL)-4-PIPERIDINYL]METHYL]PIPERAZINE	0.249213	0.999923	0.857302	0	0	0	0.836645	0	0	0	0	0.10441	0	1	0.403642
1-[1-(3-aminophenyl)-3-tert-butyl-1H-pyrazol-5-yl]-3-naphthalen-1-ylurea	1	0.963876	0.9998	1	0.999476	1	0.626691	0.999286	1	1	1	0.999033	1	1	0.999611
1-[1-(3-aminophenyl)-3-tert-butyl-1H-pyrazol-5-yl]-3-phenylurea	1	0.99994	0.999951	1	0.974114	1	0.751788	0.999246	1	1	1	0.999795	1	1	0.999915
1-[2-(3-Biphenyl)-4-Methylvaleryl)]Amino-3-(2-Pyridylsulfonyl)Amino-2-Propanone	0.999957	0.876216	0.999814	1	0.931818	1	0.547572	0.997706	1	1	1	0.994444	1	1	0.998072
1-[2-(S)-AMINO-3-BIPHENYL-4-YL-PROPIONYL]-PYRROLIDINE-2-(S)-CARBONITRILE	0.997123	0.813994	0.999671	1	0.930433	1	0.668199	0.999292	1	1	1	0.681909	1	1	0.892901
1-[2-AMINO-2-CYCLOHEXYL-ACETYL]-PYRROLIDINE-3-CARBOXYLIC ACID 5-CHLORO-2-(2-ETHYLCARBAMOYL-ETHOXY)-BENZYLAMIDE	0.999935	0.99999	0.999539	1	0.97412	1	0.974446	0.999238	1	1	1	0.997747	1	1	0.999074
1-[2-DEOXYRIBOFURANOSYL]-2,4-DIFLUORO-5-METHYL-BENZENE-5'MONOPHOSPHATE	0.988474	0.154813	0.999998	1	1	1	0.071917	0.999286	1	1	1	0.995176	1	1	0.99455
1-[3-({[(4-AMINO-5-FLUORO-2-METHYLQUINOLIN-3-YL)METHYL]THIO}METHYL)PHENYL]-2,2,2-TRIFLUOROETHANE-1,1-DIOL	0.997365	0.375522	0.998594	1	1	1	0.445619	0.999286	1	1	1	0.993723	1	1	0.996561
1-[3,3-Dimethyl-2-(2-Methylamino-Propionylamino)-Butyryl]-Pyrrolidine-2-Carboxylic Acid(1,2,3,4-Tetrahydro-Naphthalen-1-Yl)-Amide	0.033852	0.670057	0.000701	0	0.001865	0	0.681073	0	0	0	0	0.003293	0	0	0.012615
1-[4-(2-oxo-2-phenylethyl)phenyl]guanidine	0.026626	0.939436	0.00011	0	0.00122	0	0.635348	0	0	0	0	0.001616	0	0	0.00945
1-[4-(4-chlorobenzyl)-1-(7H-pyrrolo[2,3-d]pyrimidin-4-yl)piperidin-4-yl]methanamine	0.00733	0.104497	0.00248	0	0.026944	0.013889	0.398379	0.020408	0.017143	0	0	0.012804	0.013889	0	0.007538
1-[4-(4-chlorophenyl)-1-(7H-pyrrolo[2,3-d]pyrimidin-4-yl)piperidin-4-yl]methanamine	0.00705	0.929989	3.1e-05	0	0.156971	0.018868	0.528918	0	0	0	0	0.004879	0.018868	0	0.003987
1-[4-(AMINOMETHYL)BENZOYL]-5'-FLUORO-1'H-SPIRO[PIPERIDINE-4,2'-QUINAZOLIN]-4'-AMINE	0.981515	0.09804	0.999998	1	1	1	0.096799	0.999286	1	1	1	0.995176	1	1	0.99223
1-[4-(AMINOSULFONYL)PHENYL]-1,6-DIHYDROPYRAZOLO[3,4-E]INDAZOLE-3-CARBOXAMIDE	0.013396	0.687792	9.2e-05	0	0.00122	0	0.499805	0	0	0	0	0.0021	0	0	0.005196
1-[4-(hydroxymethyl)phenyl]guanidine	0.119991	0.438468	9.1e-05	0	0.00122	0	0.37844	0	0	0	0	0.003654	0	0	0.041245
1-[4-(Octahydro-Pyrido[1,2-a]Pyrazin-2-Yl)-Phenyl]-2-Phenyl-1,2,3,4-Tetrahydro-Isoquinolin-6-Ol	1	0.999429	1	1	0.504132	1	0.861328	0.997226	1	1	1	1	1	1	1
1-[4-(PYRIDIN-4-YLOXY)PHENYL]-3-[3-(TRIFLUOROMETHYL)PHENYL]UREA	0.999999	1	0.999998	1	0.974325	1	0.960404	0.999235	1	1	1	0.999317	1	1	0.999771
1-[5-methyl-2-(trifluoromethyl)furan-3-yl]-3-[(2Z)-5-(2-{[6-(1H-1,2,4-triazol-3-ylamino)pyrimidin-4-yl]amino}ethyl)-1,3-thiazol-2(3H)-ylidene]urea	0.998414	0.898521	0.998706	1	0.922218	1	0.551452	1	1	1	1	0.99957	1	1	0.998897
1-[N-4'-NITROBENZYL-N-4'-CARBOXYBUTYLAMINO]METHYLPHOSPHONIC ACID	0.464454	0.889762	0.002131	0	0.00122	0	0.485705	0	0	0	0	0.003243	0	0	0.156609
1-[N[(Phenylmethoxy)Carbonyl]-L-Leucyl-4-[[N/N-[(Phenylmethoxy)Carbonyl]-/Nl-Leucyl]Amino]-3-Pyrrolidinone/N	0.999957	0.876216	0.999814	1	0.931818	1	0.547572	0.997706	1	1	1	0.994444	1	1	0.998072
1-{(1R,2S)-2-HYDROXY-1-[2-(2-NAPHTHYLOXY)ETHYL]PROPYL}-1H-IMIDAZONE-4-CARBOXAMIDE	0.95687	1	1	1	0.998276	1	0.872484	1	1	1	1	0.99919	1	1	0.985353
1-{[(3R)-3-methyl-4-({4-[(1S)-2,2,2-trifluoro-1-hydroxy-1-methylethyl]phenyl}sulfonyl)piperazin-1-yl]methyl}cyclopropanecarboxamide	0.045684	0.654573	0.000338	0	0.481132	0	0.647987	0	0.017143	0	0	0	0	0	0.015341
1-{[1-(2-AMINO-3-PHENYL-PROPIONYL)-PYRROLIDINE-2-CARBONYL]-AMINO}-2-(3-CYANO-PHENYL)-ETHANEBORONIC ACID	0.064259	0.326457	8.4e-05	0	0.00122	0	0.294827	0	0	0	0	0.003654	0	0	0.022665
1-{2-[(4-CHLOROPHENYL)AMINO]-2-OXOETHYL}-N-(1-ISOPROPYLPIPERIDIN-4-YL)-1H-INDOLE-2-CARBOXAMIDE	0.249213	0.999923	0.857302	0	0	0	0.836645	0	0	0	0	0.10441	0	1	0.403642
1-{2-[2-(2-Methoxyethoxy)Ethoxy]Ethoxy}-4-(1,1,3,3-Tetramethylbutyl)Benzene	0.34461	0	6e-06	0	0.296685	1	0	0	0	1	0.8	0.600335	1	0	0.314984
1-{2-[3-(2-Chloro-4,5-difluoro-benzoyl)-ureido]-4-fluoro-phenyl}-piperidine-4-carboxylic acid	0.996309	1	0.999484	1	0.989434	1	0.490665	1	1	1	1	1	1	1	0.998598
1-{2-OXO-3-[(1R)-1-(1H-PYRROL-2-YL)ETHYL]-2H-INDOL-5-YL}UREA	0.999992	0.955769	0.998556	1	0.999476	1	0.632102	0.999286	1	1	1	0.999033	1	1	0.999194
1-{3-oxo-3-[(2S)-2-(pyrrolidin-1-ylcarbonyl)pyrrolidin-1-yl]propyl}-3-phenylquinoxalin-2(1H)-one	0.966956	0.077019	0.999998	1	1	1	0.070447	0.999286	1	1	1	0.996794	1	1	0.987916
1-{5-[2-(thieno[3,2-d]pyrimidin-4-ylamino)ethyl]-1,3-thiazol-2-yl}-3-[3-(trifluoromethyl)phenyl]urea	1	0.999961	0.999156	1	0.982856	1	0.584027	0.999287	1	1	1	1	1	1	0.999719
1-{7-cyclohexyl-6-[4-(4-methylpiperazin-1-yl)benzyl]-7H-pyrrolo[2,3-d]pyrimidin-2-yl}methanamine	0.999957	0.876216	0.999814	1	0.931818	1	0.547572	0.997706	1	1	1	0.994444	1	1	0.998072
1-3 Sugar Ring of Pentamannosyl 6-Phosphate	0.964774	1	0.999964	1	0.968514	0.99635	0.081642	1	0.99635	1	1	1	0.99635	1	0.988246
1-ACETYL-2-CARBOXYPIPERIDINE	0.680447	0.04891	0.997011	1	1	1	0.30899	0.999286	1	1	1	0.997541	1	1	0.891666
1-Acetyl-4-(4-{4-[(2-Ethoxyphenyl)Thio]-3-Nitrophenyl}Pyridin-2-Yl)Piperazine	0.00898	0.882288	0.04229	0	0.00122	0	0.619964	0	0	0	0	0.122561	0	0	0.057943
1-Allyl-3-Butyl-8-(N-Acetyl-4-Aminobenzyl)-Xanthine	0.996338	1	0.999484	1	0.989434	1	0.379816	1	1	1	1	1	1	1	0.998607
1-Amino-6-Cyclohex-3-Enylmethyloxypurine	0.999975	0.934425	0.998387	1	0.999476	1	0.566291	0.999286	1	1	1	0.999033	1	1	0.999132
1-Anilino-8-Naphthalene Sulfonate	0.034011	0.163055	3.8e-05	0	0.03229	0	0.449994	0	0	0	0	0.0013	0	0	0.011783
1-Azepan-1-Yl-2-Phenyl-2-(4-Thioxo-1,4-Dihydro-Pyrazolo[3,4-D]Pyrimidin-5-Yl)Ethanone Adduct	0.239475	0.430511	0.000432	0	0.481132	0	0.474356	0	0.017143	0	0	0.08618	0	0	0.108696
1-Benzyl-3-(4-Methoxy-Benzenesulfonyl)-6-Oxo-Hexahydro-Pyrimidine-4-Carboxylic Acid Hydroxyamide	0.999569	0.970649	0.99988	1	0.971491	1	0.473354	0.999123	0.991379	1	1	0.995953	1	1	0.998467
1-BENZYL-3-(4-METHOXYPHENYLAMINO)-4-PHENYLPYRROLE-2,5-DIONE	0.764627	0.259356	0.001736	1	0.001865	0	0.648563	0	0	0	0	0.698221	0	0	0.488195
1-BENZYL-4-[(5,6-DIMETHOXY-1-INDANON-2-YL)METHYL]PIPERIDINE	0.997365	0.375522	0.998594	1	1	1	0.445619	0.999286	1	1	1	0.993723	1	1	0.996561
1-Benzyl-5-Methoxy-2-Methyl-1h-Indol-3-Yl)-Acetic Acid	0.896026	0.03229	0.997908	1	1	1	0.35027	0.999286	1	1	1	0.997541	1	1	0.963825
1-benzylimidazole	0.972584	0.193639	0.999998	1	1	1	0.056554	0.999286	1	1	1	0.995176	1	1	0.989253
1-Benzyloxycarbonylamino-2-Phenyl-Ethyl)-{2-[1-Carbamoyl-2-(1h-Indol-3-Yl)-Ethylcarbamoyl]-5-Phenyl-Pentyl}-Phosphinic Acid	0.999715	0.594317	0.999935	1	0.993189	1	0.638483	1	1	1	1	0.997794	1	1	0.999148
1-biphenyl-2-ylmethanamine	0.997123	0.813994	0.999671	1	0.930433	1	0.668199	0.999292	1	1	1	0.681909	1	1	0.892901
1-butanoyl-N-(4-carbamimidoylbenzyl)-L-prolinamide	0.999935	0.99999	0.999539	1	0.97412	1	0.974446	0.999238	1	1	1	0.997747	1	1	0.999074
1-CHLORO-6-(4-HYDROXYPHENYL)-2-NAPHTHOL	0.875521	0.976235	0.946879	1	1	1	0.588585	0	1	1	0.7	0.399476	1	1	0.740625
1-cyclobutyl-3-(3,4-dimethoxyphenyl)-1H-pyrazolo[3,4-d]pyrimidin-4-amine	0.999997	0.995606	0.999988	1	0.960405	1	0.726214	0.999265	1	1	1	0.998964	1	1	0.999649
1-CYCLOHEXYL-N-{[1-(4-METHYLPHENYL)-1H-INDOL-3-YL]METHYL}METHANAMINE	0.005726	0.102552	0.001566	0	0.002994	0	0.137391	0	0	0	0	0.003243	0	0	0.003512
1-cyclopentyl-3-(1H-pyrrolo[2,3-b]pyridin-5-yl)-1H-pyrazolo[3,4-d]pyrimidin-4-amine	1	0.99994	0.999951	1	0.974114	1	0.751788	0.999246	1	1	1	0.999795	1	1	0.999915
1-Deaza-Adenosine	0.239134	0.999998	0.000265	1	0.98	1	0.612464	0.066667	0.111111	1	0.8	0.6	1	0	0.2798
1-DECYL-3-TRIFLUORO ETHYL-SN-GLYCERO-2-PHOSPHOMETHANOL	0.896026	0.03229	0.997908	1	1	1	0.35027	0.999286	1	1	1	0.997541	1	1	0.963825
1-Deoxy-1-Acetylamino-Beta-D-Gluco-2-Heptulopyranosonamide	0.001343	0	0.000605	0	0.042886	0	0	0.012346	0.010526	0	0	0.001102	0	0	0.001017
1-Deoxy-1-Methoxycarbamido-Beta-D-Gluco-2-Heptulopyranosonamide	0.992147	1	1	1	1	1	0.395311	1	1	1	1	1	1	1	0.997382
1-Deoxy-1-Methoxycarbamido-Beta-D-Glucopyranose	0.996524	1	0.999568	1	0.984724	1	0.545622	0.999265	1	1	1	0.999127	1	1	0.998406
1-Deoxy-1-Thio-Heptaethylene Glycol	0.997479	0.513153	0.999847	1	0.993189	1	0.606079	1	1	1	1	0.997794	1	1	0.998373
1-Deoxynojirimycin	0.992363	0.987057	1	1	0.960921	0.9875	0.566944	0.997619	1	1	1	0.799342	0.9875	1	0.930568
1-DODECANOL	0.373377	0.079794	0.89779	1	1	1	0.245342	0.999286	1	1	0.7	0.856144	1	1	0.709103
1-ETHOXY-2-(2-ETHOXYETHOXY)ETHANE	0.997365	0.375522	0.998594	1	1	1	0.445619	0.999286	1	1	1	0.993723	1	1	0.996561
1-ETHOXYCARBONYL-D-PHE-PRO-2(4-AMINOBUTYL)HYDRAZINE	0.999935	0.99999	0.999539	1	0.97412	1	0.974446	0.999238	1	1	1	0.997747	1	1	0.999074
1-ethyl-N-(phenylmethyl)-4-(tetrahydro-2H-pyran-4-ylamino)-1H-pyrazolo[3,4-b]pyridine-5-carboxamide	0.97248	0.080932	0.851396	1	1	1	0.137506	0.999286	1	1	1	0.576749	1	1	0.800208
1-Ethyl-Pyrrolidine-2,5-Dione	0.324138	0.999616	0.999489	1	0.723459	1	0.54569	1	1	1	1	0.80281	1	1	0.708812
1-GUANIDINO-4-(N-NITRO-BENZOYLAMINO-L-LEUCYL-L-PROLYLAMINO)BUTANE	0.999935	0.99999	0.999539	1	0.97412	1	0.974446	0.999238	1	1	1	0.997747	1	1	0.999074
1-GUANIDINO-4-(N-PHENYLMETHANESULFONYL-L-LEUCYL-L-PROLYLAMINO)BUTANE	0.999935	0.99999	0.999539	1	0.97412	1	0.974446	0.999238	1	1	1	0.997747	1	1	0.999074
1-Hexadecylsulfonyl Fluoride	0.201789	0.100888	0.001143	0	0	0	0.135976	0	0	0	0	0.002044	0	0	0.068325
1-Hydroxy-1-Thio-Glycerol	0.966956	0.077019	0.999998	1	1	1	0.070447	0.999286	1	1	1	0.996794	1	1	0.987916
1-Hydroxy-2-Amino-3-Cyclohexylpropane	0.003594	0	0	0	0.068204	0	0	0	0	0	0	0.000672	0	0	0.001422
1-Hydroxy-2-S-Glutathionyl-3-Para-Nitrophenoxy-Propane	0.967015	0.335206	0.922803	1	1	1	0.444515	0.999286	1	1	0.9	0.992793	1	1	0.96087
1-Hydroxy-3-Methylbutane	0.002072	0	2.1e-05	0	0.080865	0	0	0	0	0	0	0.000581	0	0	0.000891
1-Hydroxyamine-2-Isobutylmalonic Acid	0.999717	0.399433	0.999726	1	1	1	0.458535	0.999286	1	1	1	0.994331	1	1	0.997925
1-Methoxy-2-(2-Methoxyethoxy)Ethane	0.993337	0.091628	0.999989	1	1	1	0.121278	0.999286	1	1	1	0.996794	1	1	0.996707
1-Methoxy-2-[2-(2-Methoxy-Ethoxy]-Ethane	0.003493	0.104597	6.3e-05	0	0.026944	0.013889	0.304907	0.020408	0.017143	0	0	0.003654	0.013889	0	0.002403
1-Methyl-2-Oxy-5,5-Dimethyl Pyrrolidine	0.003594	0	0	0	0.068204	0	0	0	0	0	0	0.000672	0	0	0.001422
1-methyl-3-naphthalen-2-yl-1H-pyrazolo[3,4-d]pyrimidin-4-amine	0.102162	0.09246	6.5e-05	0	0.038947	0	0.000154	0	0	0	0	0.000774	0	0	0.034334
1-Methyl-3-Oxo-1,3-Dihydro-Benzo[C]Isothiazole-5-Sulfonic Acid Amide	0.96533	0.694746	0.99935	1	0.930826	1	0.161165	1	1	1	1	0.999573	1	1	0.988084
1-METHYL-3-PHENYL-1H-PYRAZOL-5-YLSULFAMIC ACID	0.345266	0.500198	0.001558	0	0.00122	0	0.419822	0	0	0	0	0.0021	0	0	0.116308
1-METHYL-3-TRIFLUOROMETHYL-1H-THIENO[2,3-C]PYRAZOLE-5-CARBOXYLIC ACID (2-MERCAPTO-ETHYL)-AMIDE	0.998535	0.662989	0.999993	1	1	1	0.622003	0.999286	1	1	1	0.995027	1	1	0.997852
1-METHYL-5-(2-PHENOXYMETHYL-PYRROLIDINE-1-SULFONYL)-1H-INDOLE-2,3-DIONE	0.986005	0.082411	0.999984	1	1	1	0.116636	0.999286	1	1	1	0.996794	1	1	0.994261
1-methyl-8-(phenylamino)-4,5-dihydro-1H-pyrazolo[4,3-h]quinazoline-3-carboxylic acid	0.013396	0.687792	9.2e-05	0	0.00122	0	0.499805	0	0	0	0	0.0021	0	0	0.005196
1-Methylimidazole	0.933033	0.028431	0.99795	1	1	1	0.365237	0.999286	1	1	1	0.997541	1	1	0.976174
1-Methyloxy-4-Sulfone-Benzene	0.99953	0.420567	0.999719	1	1	1	0.461699	0.999286	1	1	1	0.895262	1	1	0.964837
1-N-(4-SULFAMOYLPHENYL-ETHYL)-2,4,6-TRIMETHYLPYRIDINIUM	0.97162	0.080163	0.999639	1	1	1	0.124021	0.999286	1	1	1	0.996794	1	1	0.989351
1-N-Acetyl-Beta-D-Glucosamine	0.373377	0.079794	0.89779	1	1	1	0.245342	0.999286	1	1	0.7	0.856144	1	1	0.709103
1-O-Octyl-2-Heptylphosphonyl-Sn-Glycero-3-Phosphoethanolamine	0.993234	1	0.999354	1	0.989434	1	0.556304	1	1	1	1	1	1	1	0.997529
1-Octadecyl-2-Acetamido-2-Deoxy-Sn-Glycerol-3-Phosphoethylmethyl Sulfide	0.993234	1	0.999354	1	0.989434	1	0.556304	1	1	1	1	1	1	1	0.997529
1-PHENYL-1H-PYRAZOLE-4-CARBOXYLIC ACID	0.815865	0.217406	0.999924	1	1	1	0.334896	0.999286	1	1	0.9	0.802334	1	1	0.872708
1-Phenylsulfonamide-3-Trifluoromethyl-5-Parabromophenylpyrazole	0.11457	0.999804	0.000434	0	0.033704	0	0.79768	0	0	0	0	0.00356	0	0	0.039521
1-Proponol	0.993202	1	0.99945	1	0.989434	1	0.555371	1	1	1	1	1	1	1	0.99755
1-Ter-Butyl-3-P-Tolyl-1h-Pyrazolo[3,4-D]Pyrimidin-4-Ylamine	1	0.987741	0.999909	1	0.999476	1	0.754452	0.999286	1	1	1	0.999033	1	1	0.999647
1-TERT-BUTYL-3-(2,5-DIMETHYLBENZYL)-1H-PYRAZOLO[3,4-D]PYRIMIDIN-4-AMINE	0.999999	0.999997	1	1	0.883626	1	0.999733	0.999178	1	1	1	0.999812	1	1	0.999937
1-tert-butyl-3-(3-methylbenzyl)-1H-pyrazolo[3,4-d]pyrimidin-4-amine	0.99995	0.94519	0.997912	1	0.999476	1	0.603954	0.999286	1	1	1	0.999033	1	1	0.998965
1-Tert-Butyl-3-(4-Chloro-Phenyl)-1h-Pyrazolo[3,4-D]Pyrimidin-4-Ylamine	1	0.984694	0.999946	1	0.999476	1	0.712941	0.999286	1	1	1	0.999033	1	1	0.99966
1,1,1-TRIFLUORO-3-((N-ACETYL)-L-LEUCYLAMIDO)-4-PHENYL-BUTAN-2-ONE(N-ACETYL-L-LEUCYL-L-PHENYLALANYL TRIFLUOROMETHYL KETONE)	0.000424	0.114026	2.1e-05	0	0.03229	0	0.405136	0	0	0	0	0.0013	0	0	0.000582
1,1,1-TRIFLUORO-3-(OCTYLTHIO)ACETONE	0.924682	0.386193	0.99877	1	0.651673	1	0.43643	1	1	0	0.5	0.300509	1	1	0.74132
1,1,1-TRIFLUORO-3-ACETAMIDO-4-PHENYL BUTAN-2-ONE(N-ACETYL-L-PHENYLALANYL TRIFLUOROMETHYL KETONE)	0.119991	0.438468	9.1e-05	0	0.00122	0	0.37844	0	0	0	0	0.003654	0	0	0.041245
1,1,1,3,3,3-HEXAFLUORO-2-{4-[(2,2,2-TRIFLUOROETHYL)AMINO]PHENYL}PROPAN-2-OL	0.140928	0.214599	0.001096	0	0.03229	0	0.54095	0	0	0	0	0.000655	0	0	0.04756
1,2-Diacyl-Sn-Glycero-3-Phosphoinositol	0.99027	0.127409	0.999998	1	1	1	0.078341	0.999286	1	1	1	0.995176	1	1	0.995148
1,2-Propanediol	0.993234	1	0.999354	1	0.989434	1	0.556304	1	1	1	1	1	1	1	0.997529
1,2,3-TRIHYDROXY-1,2,3,4-TETRAHYDROBENZO[A]PYRENE	0.988474	0.154813	0.999998	1	1	1	0.071917	0.999286	1	1	1	0.995176	1	1	0.99455
1,2,3,4-Tetrahydro-Isoquinoline-7-Sulfonic Acid Amide	0.970313	0.202819	0.999998	1	1	1	0.060218	0.999286	1	1	1	0.995176	1	1	0.988496
1,2,4-Triazole	0.96533	0.694746	0.99935	1	0.930826	1	0.161165	1	1	1	1	0.999573	1	1	0.988084
1,2,4-Triazole-Carboxamidine	0.999458	0.460081	0.999998	1	1	1	0.409552	0.999286	1	1	1	0.995027	1	1	0.998161
1,2,5-THIADIAZOLIDIN-3-ONE-1,1-DIOXIDE	0.345266	0.500198	0.001558	0	0.00122	0	0.419822	0	0	0	0	0.0021	0	0	0.116308
1,2,5,8-tetrahydroxyanthracene-9,10-dione	0.465677	0.649298	0.000448	0	0.03229	0	0.373447	0	0	0	0	0.20082	0	0	0.222315
1,3-CYCLOHEXANEDIOL, 4-METHYLENE-5-[(2E)-[(1S,3AS,7AS)-OCTAHYDRO-1-(5-HYDROXY-5-METHYL-1,3-HEXADIYNYL)-7A-METHYL-4H-INDEN-4-YLIDENE]ETHYLIDENE]-, (1R,3S,5Z)	0.087077	0.514394	0.000148	0	0.00122	0	0.323756	0	0	0	0	0.103654	0	0	0.063626
1,3-Dihydroxyacetonephosphate	0.996309	1	0.999484	1	0.989434	1	0.490665	1	1	1	1	1	1	1	0.998598
1,3-Propandiol	0.095513	0.844111	6.3e-05	0	0.00122	0	0.642342	0	0	0	0	0.003243	0	0	0.03294
1,3,2-Dioxaborolan-2-Ol	0.064259	0.326457	8.4e-05	0	0.00122	0	0.294827	0	0	0	0	0.003654	0	0	0.022665
1,3,5-BENZENETRICARBOXYLIC ACID	0.933033	0.028431	0.99795	1	1	1	0.365237	0.999286	1	1	1	0.997541	1	1	0.976174
1,4-Butanediol	0.283375	0.075999	0.000247	0	0.051587	0.013889	0.369091	0.020408	0.017143	0	0	0.005577	0.013889	0	0.096399
1,4-Dideoxy-5-Dehydro-O2-Sulfo-Glucuronic Acid	0.995451	0.316038	0.999858	1	1	1	0.421965	0.999286	1	1	1	0.896452	1	1	0.96392
1,4-Dideoxy-O2-Sulfo-Glucuronic Acid	0.978829	0.246254	0.999929	1	1	1	0.366926	0.999286	1	1	1	0.995928	1	1	0.991562
1,4-Diethylene Dioxide	0.204838	0.449219	0.005561	0	0.481132	0	0.440091	0	0	0	0	0.18618	0	0	0.132193
1,4-Dithio-Alpha-D-Mannose	0.996309	1	0.999484	1	0.989434	1	0.490665	1	1	1	1	1	1	1	0.998598
1,4-Dithiothreitol	0.096457	0.298	0.350337	0	0.002994	0	0.347965	0	0	0	0	0.205344	0	0	0.217379
1,5-Bis(N-Benzyloxycarbonyl-L-Leucinyl)Carbohydrazide	0.999957	0.876216	0.999814	1	0.931818	1	0.547572	0.997706	1	1	1	0.994444	1	1	0.998072
1,5-Dideoxy-1,5-Imino-D-Mannitol	0.680447	0.04891	0.997011	1	1	1	0.30899	0.999286	1	1	1	0.997541	1	1	0.891666
1,6-DI-O-PHOSPHONO-D-MANNITOL	0.373377	0.079794	0.89779	1	1	1	0.245342	0.999286	1	1	0.7	0.856144	1	1	0.709103
1,6-Fructose Diphosphate (Linear Form)	0.996309	1	0.999484	1	0.989434	1	0.490665	1	1	1	1	1	1	1	0.998598
1,6,7,8,9,11A,12,13,14,14A-DECAHYDRO-1,13-DIHYDROXY-6-METHYL-4H-CYCLOPENT[F]OXACYCLOTRIDECIN-4-ONE	0.044582	0.85682	7.1e-05	0	0.00122	0	0.572382	0	0	0	0	0.003243	0	0	0.015966
1,8-Di-Hydroxy-4-Nitro-Anthraquinone	0.78872	0.817295	0.169705	0	0.00122	0	0.391675	0	0	0	0	0.199561	0	1	0.385996
1,8-Di-Hydroxy-4-Nitro-Xanthen-9-One	0.78872	0.817295	0.169705	0	0.00122	0	0.391675	0	0	0	0	0.199561	0	1	0.385996
10-CF3C(OH)2-DDACTHF	0.998573	0.783039	0.999998	1	1	1	0.497853	0.999286	1	1	1	0.995027	1	1	0.997866
10-Propargyl-5,8-Dideazafolic Acid	0.023299	0.120443	6.1e-05	0	0.051587	0.013889	0.340541	0.020408	0.017143	0	0	0.0021	0.013889	0	0.008487
10,11-dimethoxy-4-methyldibenzo[c,f]-2,7-naphthyridine-3,6-diamine	0.999479	0.944942	0.999269	1	0.966712	1	0.624013	1	1	1	1	0.998577	1	1	0.999108
12-(2-hydroxyethyl)-2-(1-methylethoxy)-13,14-dihydronaphtho[2,1-a]pyrrolo[3,4-c]carbazol-5(12H)-one	0.999965	0.993778	0.999982	1	0.999476	1	0.73631	0.999286	1	1	1	0.999033	1	1	0.99966
12-Bromododecanoic Acid	0.986704	0.079866	0.999995	1	1	1	0.103759	0.999286	1	1	1	0.996794	1	1	0.994498
12-Hydroxydodecanoic Acid	0.933567	0.080752	0.992211	1	1	1	0.132051	0.999286	1	1	0.8	0.996794	1	1	0.974191
12-Phenylheme	0.201789	0.100888	0.001143	0	0	0	0.135976	0	0	0	0	0.002044	0	0	0.068325
13-Acetylphorbol	1	0.967151	0.999426	1	0.999476	1	0.667156	0.999286	1	1	1	0.999033	1	1	0.999486
16,17-Androstene-3-Ol	0.005726	0.102552	0.001566	0	0.002994	0	0.137391	0	0	0	0	0.003243	0	0	0.003512
16g	0.566782	0.057498	0.993996	1	1	1	0.276611	0.999286	1	1	1	1	1	1	0.853593
17-HYDROXY-18A-HOMO-19-NOR-17ALPHA-PREGNA-4,9,11-TRIEN-3-ONE	0.799438	0.999876	0.478896	0	0.757728	1	0.903423	0	1	1	0.6	0.799179	1	1	0.692504
17-METHYL-17-ALPHA-DIHYDROEQUILENIN	0.971079	0.978173	0.993831	1	1	1	0.581598	0.999286	1	1	0.8	0.499476	1	1	0.821462
18-CHLORO-11,12,13,14-TETRAHYDRO-1H,10H-8,4-(AZENO)-9,15,1,3,6-BENZODIOXATRIAZACYCLOHEPTADECIN-2-ONE	0.999792	0.927125	0.994791	1	0.999476	1	0.544563	0.999286	1	1	1	0.999033	1	1	0.997872
19-(cyclopropylamino)-4,6,7,15-tetrahydro-5H-16,1-(azenometheno)-10,14-(metheno)pyrazolo[4,3-o][1,3,9]triazacyclohexadecin-8(9H)-one	0.465677	0.649298	0.000448	0	0.03229	0	0.373447	0	0	0	0	0.20082	0	0	0.222315
1alpha,25-Dihydroxyl-20-Epi-22-Oxa-24,26,27-Trihomovitamin D3	0.009666	0.059801	0.012621	0	0.021606	0.038462	0.116285	0.029412	0	0	0	0.002571	0.038462	0	0.008286
1h-Benoximidazole-2-Carboxylic Acid	0.921542	0.030615	0.997929	1	1	1	0.356023	0.999286	1	1	1	0.997541	1	1	0.972337
1H-INDOL-3-YLACETIC ACID	0.391623	0	6e-06	0	0.296685	1	0	0	0	1	0.8	0.400335	1	0	0.263988
1S,3AS,8AS-TRIMETHYL-1-OXIDO-1,2,3,3A,8,8A-HEXAHYDROPYRROLO[2,3-B]INDOL-5-YL 2-ETHYLPHENYLCARBAMATE	0.997365	0.375522	0.998594	1	1	1	0.445619	0.999286	1	1	1	0.993723	1	1	0.996561
2-((9H-PURIN-6-YLTHIO)METHYL)-5-CHLORO-3-(2-METHOXYPHENYL)QUINAZOLIN-4(3H)-ONE	0.982816	0.257387	0.999996	1	1	1	0.335646	0.999286	1	1	1	0.993489	1	1	0.992101
2-({[2,3,5,6-TETRAFLUORO-3'-(TRIFLUOROMETHOXY)BIPHENYL-4-YL]AMINO}CARBONYL)CYCLOPENTA-1,3-DIENE-1-CARBOXYLIC ACID	0.076201	0	0.997372	0	0	0	0	0.002606	0	0	0	0.2	0	1	0.424524
2-({[3-(3,4-dihydroisoquinolin-2(1H)-ylsulfonyl)phenyl]carbonyl}amino)benzoic acid	0.005726	0.102552	0.001566	0	0.002994	0	0.137391	0	0	0	0	0.003243	0	0	0.003512
2-({[3,5-DIFLUORO-3'-(TRIFLUOROMETHOXY)BIPHENYL-4-YL]AMINO}CARBONYL)CYCLOPENT-1-ENE-1-CARBOXYLIC ACID	0.076201	0	0.997372	0	0	0	0	0.002606	0	0	0	0.2	0	1	0.424524
2-({2-[(3-HYDROXYPHENYL)AMINO]PYRIMIDIN-4-YL}AMINO)BENZAMIDE	0.9116	0.869141	0.427578	1	0.32868	1	0.487442	0	1	0	0.2	0.300666	1	1	0.546614
2-({2-[(3R)-3-AMINOPIPERIDIN-1-YL]-4-OXOQUINAZOLIN-3(4H)-YL}METHYL)BENZONITRILE	0.997123	0.813994	0.999671	1	0.930433	1	0.668199	0.999292	1	1	1	0.681909	1	1	0.892901
2-({4-[(5-CHLORO-1H-INDOL-2-YL)SULFONYL]PIPERAZIN-1-YL}CARBONYL)THIENO[3,2-B]PYRIDINE 4-OXIDE	0.167156	0.920918	0.070432	0	0.094122	0	0.79017	0	0	0	0	0.000362	0	0	0.079317
2-({4-[4-(pyridin-4-ylmethyl)-1H-pyrazol-3-yl]phenoxy}methyl)quinoline	0.173373	0.005837	0.179005	0	0.123271	0	0.007201	0	0	0	0	0.00077	0	0	0.117716
2-({5-CHLORO-2-[(2-METHOXY-4-MORPHOLIN-4-YLPHENYL)AMINO]PYRIMIDIN-4-YL}AMINO)-N-METHYLBENZAMIDE	1	0.973884	0.999563	1	0.999476	1	0.694636	0.999286	1	1	1	0.999033	1	1	0.999532
2-({8-[(3R)-3-AMINOPIPERIDIN-1-YL]-1,3-DIMETHYL-2,6-DIOXO-1,2,3,6-TETRAHYDRO-7H-PURIN-7-YL}METHYL)BENZONITRILE	0.997123	0.813994	0.999671	1	0.930433	1	0.668199	0.999292	1	1	1	0.681909	1	1	0.892901
2-(1,1-DIMETHYLETHYL)9-FLUORO-3,6-DIHYDRO-7H-BENZ[H]-IMIDAZ[4,5-F]ISOQUINOLIN-7-ONE	0.97875	0.919081	0.988623	1	0.966712	1	0.567183	1	1	1	1	0.999213	1	1	0.988862
2-(1,1'-Biphenyl-4-Yl)Propanoic Acid	0.012883	0.894923	0.009021	0	0.00122	0	0.49062	0	0	0	0	0.001633	0	0	0.007846
2-(1,3-benzodioxol-5-yl)-5-[(3-fluoro-4-methoxybenzyl)sulfanyl]-1,3,4-oxadiazole	0.824762	0.804833	0.075613	1	0.03229	0	0.46075	0	0	0	0	0.30082	0	0	0.400398
2-(1,3-thiazol-4-yl)-1H-benzimidazole-5-sulfonamide	0.97162	0.080163	0.999639	1	1	1	0.124021	0.999286	1	1	1	0.996794	1	1	0.989351
2-(1H-imidazol-1-yl)-9-methoxy-8-(2-methoxyethoxy)benzo[c][2,7]naphthyridin-4-amine	0.999992	0.955769	0.998556	1	0.999476	1	0.632102	0.999286	1	1	1	0.999033	1	1	0.999194
2-(1H-pyrazol-3-yl)-1H-benzimidazole	0.999884	0.974124	0.999149	1	0.990864	1	0.56205	0.999266	1	1	1	0.999483	1	1	0.999505
2-(1H-pyrrol-1-ylcarbonyl)benzene-1,3,5-triol	0.969317	0.883901	0.999998	1	0.996972	1	0.091167	0.999259	1	1	1	0.99955	1	1	0.989621
2-(2-{2-[(BIPHENYL-4-YLMETHYL)-AMINO]-3-MERCAPTO-PENTANOYLAMINO}-ACETYLAMINO)-3-METHYL-BUTYRIC ACID METHYL ESTER	0.999489	0.552731	0.999895	1	0.95966	1	0.608216	1	1	1	1	0.998098	1	1	0.999161
2-(2-{2-[2-(2-{2-[2-(2-Ethoxy-Ethoxy)-Ethoxy]-Ethoxy}-Ethoxy)-Ethoxy]-Ethoxy}-Ethoxy)-Ethanol, Polyethyleneglycol Peg400	0.151551	0.623301	0.001234	0	0.481132	0	0.614292	0	0.017143	0	0	0.283275	0	0	0.145353
2-(2-CHLORO-4-FLUOROPHENOXY)-2-METHYL-N-[(1R,2S,3S,5S,7S)-5-(METHYLSULFONYL)-2-ADAMANTYL]PROPANAMIDE	0.045684	0.654573	0.000338	0	0.481132	0	0.647987	0	0.017143	0	0	0	0	0	0.015341
2-(2-Hydroxy-1,1-Dihydroxymethyl-Ethylamino)-Ethanesulfonic Acid	0.070906	0.999733	0.000484	0	0.002391	0.003344	0.789729	0	0	0	0	0.005802	0.003344	0	0.02573
2-(2-Hydroxy-5-Methoxy-Phenyl)-1h-Benzoimidazole-5-Carboxamidine	0.046696	0.687074	7.8e-05	0	0.00122	0	0.438225	0	0	0	0	0.003654	0	0	0.016809
2-(2-HYDROXY-BIPHENYL)-1H-BENZOIMIDAZOLE-5-CARBOXAMIDINE	0.018548	0.79602	0.000832	0	0.001865	0	0.693095	0	0	0	0	0.003293	0	0	0.007558
2-(2-HYDROXY-CYCLOPENTYL)-PENT-4-ENAL	0.00062	0.12095	2.1e-05	0	0.03229	0	0.419118	0	0	0	0	0.0013	0	0	0.000647
2-(2-Hydroxy-Phenyl)-1h-Benzoimidazole-5-Carboxamidine	0.046246	0.802935	7.8e-05	0	0.00122	0	0.485232	0	0	0	0	0.003654	0	0	0.016659
2-(2-Hydroxy-Phenyl)-1h-Indole-5-Carboxamidine	0.064259	0.326457	8.4e-05	0	0.00122	0	0.294827	0	0	0	0	0.003654	0	0	0.022665
2-(2-Hydroxy-Phenyl)-3h-Benzoimidazole-5-Carboxamidine	0.064259	0.326457	8.4e-05	0	0.00122	0	0.294827	0	0	0	0	0.003654	0	0	0.022665
2-(2-HYDROXYETHYLAMINO)-6-(3-CHLOROANILINO)-9-ISOPROPYLPURINE	0.999999	0.968152	0.999897	1	0.966712	1	0.532243	1	1	1	1	0.999213	1	1	0.999703
2-(2-METHYLPHENYL)-1H-INDOLE-5-CARBOXIMIDAMIDE	0.064259	0.326457	8.4e-05	0	0.00122	0	0.294827	0	0	0	0	0.003654	0	0	0.022665
2-(2-METHYLPHENYL)-1H-INDOLE-6-CARBOXIMIDAMIDE	0.064259	0.326457	8.4e-05	0	0.00122	0	0.294827	0	0	0	0	0.003654	0	0	0.022665
2-(2-Oxo-1,2-Dihydro-Pyridin-3-Yl)-1h-Benzoimidazole-5-Carboxamidine	0.064259	0.326457	8.4e-05	0	0.00122	0	0.294827	0	0	0	0	0.003654	0	0	0.022665
2-(2-PHENYL-3-PYRIDIN-2-YL-4,5,6,7-TETRAHYDRO-2H-ISOPHOSPHINDOL-1-YL)PYRIDINE	0.993601	0.096802	0.999998	1	1	1	0.094581	0.999286	1	1	1	0.995176	1	1	0.996259
2-(2-QUINOLIN-3-YLPYRIDIN-4-YL)-1,5,6,7-TETRAHYDRO-4H-PYRROLO[3,2-C]PYRIDIN-4-ONE	0.995828	0.907587	0.929734	1	0.999476	1	0.492126	0.999286	1	1	1	0.2803	1	1	0.735288
2-(2,6-DIFLUOROPHENOXY)-N-(2-FLUOROPHENYL)-9-ISOPROPYL-9H-PURIN-8-AMINE	0.999188	0.918861	0.988453	1	0.999476	1	0.519919	0.999286	1	1	1	0.977004	1	1	0.988215
2-(2f-Benzothiazolyl)-5-Styryl-3-(4f-Phthalhydrazidyl)Tetrazolium Chloride	0.91291	0.636772	0.999484	1	0.807659	1	0.445511	1	1	1	0.8	0.991292	1	1	0.967895
2-(3-((4,5,7-trifluorobenzo[d]thiazol-2-yl)methyl)-1H-pyrrolo[2,3-b]pyridin-1-yl)acetic acid	0.074342	0	6e-06	0	0.122552	0	0	0	0	0	0	0.00077	0	0	0.025039
2-(3-AMINO-2,5,6-TRIMETHOXYPHENYL)ETHYL 5-CHLORO-2,4-DIHYDROXYBENZOATE	0.993337	0.091628	0.999989	1	1	1	0.121278	0.999286	1	1	1	0.996794	1	1	0.996707
2-(3-CHLORO-6-{[2,2-DIFLUORO-2-(1-OXIDOPYRIDIN-2-YL)ETHYL]AMINO}-1-OXIDOPYRIDIN-2-YL)-N-[1-(3-CHLOROPHENYL)ETHYL]ACETAMIDE	0.999935	0.99999	0.999539	1	0.97412	1	0.974446	0.999238	1	1	1	0.997747	1	1	0.999074
2-(3-FLUORO-4-HYDROXYPHENYL)-7-VINYL-1,3-BENZOXAZOL-5-OL	0.875521	0.976235	0.946879	1	1	1	0.588585	0	1	1	0.7	0.399476	1	1	0.740625
2-(3-GUANIDINOPHENYL)-3-MERCAPTOPROPANOIC ACID	0.998697	0.364762	0.999907	1	1	1	0.444294	0.999286	1	1	1	0.995551	1	1	0.998052
2-(3-METHYLPHENYL)-1H-INDOLE-5-CARBOXIMIDAMIDE	0.000364	0.082822	2.1e-05	0	0.03229	0	0.300039	0	0	0	0	0.0013	0	0	0.000561
2-(3,4-DIHYDROXYPHENYL)-8-(1,1-DIOXIDOISOTHIAZOLIDIN-2-YL)-3-HYDROXY-6-METHYL-4H-CHROMEN-4-ONE	0.999966	0.999969	0.995581	1	0.980805	1	0.752692	0.997619	1	1	1	0.999901	1	1	0.998482
2-(3'-Methoxyphenyl) Benzimidazole-4-Carboxamide	0.9986	0.464073	0.999997	1	1	1	0.443933	0.999286	1	1	1	0.995551	1	1	0.998049
2-(4-(2-HYDROXY-3-(ISOPROPYLAMINO)PROPOXY)PHENYL)ETHANAMIDE	0.69245	0.046398	0.997019	1	1	1	0.296411	0.999286	1	1	1	0.997541	1	1	0.89567
2-(4-(AMINOMETHYL)PIPERIDIN-1-YL)-N-(3_CYCLOHEXYL-4-OXO-2,4-DIHYDROINDENO[1,2-C]PYRAZOL-5-YL)ACETAMIDE	0.999975	0.934425	0.998387	1	0.999476	1	0.566291	0.999286	1	1	1	0.999033	1	1	0.999132
2-(4-{(3S,5S)-5-[(3,3-difluoropyrrolidin-1-yl)carbonyl]pyrrolidin-3-yl}piperazin-1-yl)pyrimidine	0.997123	0.813994	0.999671	1	0.930433	1	0.668199	0.999292	1	1	1	0.681909	1	1	0.892901
2-(4-CARCOXY-5-ISOPROPYLTHIAZOLYL)BENZOPIPERIDINE	1	0.99994	0.999951	1	0.974114	1	0.751788	0.999246	1	1	1	0.999795	1	1	0.999915
2-(4-CHLOROBENZYLAMINO)-4-(PHENYLAMINO)PYRAZOLO[1,5-A][1,3,5]TRIAZINE-8-CARBONITRILE	0.78872	0.817295	0.169705	0	0.00122	0	0.391675	0	0	0	0	0.199561	0	1	0.385996
2-(4-Chlorophenyl)-5-Quinoxalinecarboxamide	0.9986	0.464073	0.999997	1	1	1	0.443933	0.999286	1	1	1	0.995551	1	1	0.998049
2-(4-ETHYLPIPERAZIN-1-YL)-4-(PHENYLAMINO)PYRAZOLO[1,5-A][1,3,5]TRIAZINE-8-CARBONITRILE	0.78872	0.817295	0.169705	0	0.00122	0	0.391675	0	0	0	0	0.199561	0	1	0.385996
2-(4-fluorophenyl)-N-{[3-fluoro-4-(1H-pyrrolo[2,3-b]pyridin-4-yloxy)phenyl]carbamoyl}acetamide	1	0.997004	0.999998	1	0.963262	1	0.767034	0.998566	1	1	1	0.999698	1	1	0.999899
2-(4-HYDROXY-3-NITROPHENYL)ACETIC ACID	0.17935	0.882209	0.000227	0	0.00122	0	0.496897	0	0	0	0	0.003243	0	0	0.06094
2-(4-HYDROXY-5-PHENYL-1H-PYRAZOL-3-YL)-1H-BENZOIMIDAZOLE-5-CARBOXAMIDINE	0.080603	0.866466	0.000199	0	0.00122	0	0.481296	0	0	0	0	0.002777	0	0	0.027859
2-(4-HYDROXY-PHENYL)BENZOFURAN-5-OL	0.177926	0.901619	0.000989	0	0.236095	0	0.676907	0	0	0	0	0.003059	0	0	0.060658
2-(5-CHLORO-2-THIENYL)-N-{(3S)-1-[(1S)-1-METHYL-2-MORPHOLIN-4-YL-2-OXOETHYL]-2-OXOPYRROLIDIN-3-YL}ETHANESULFONAMIDE	0.050136	0.953734	0.00023	0	0.00122	0	0.66938	0	0	0	0	0.001616	0	0	0.017327
2-(5-CHLORO-2-THIENYL)-N-{(3S)-1-[(1S)-1-METHYL-2-MORPHOLIN-4-YL-2-OXOETHYL]-2-OXOPYRROLIDIN-3-YL}ETHENESULFONAMIDE	0.050136	0.953734	0.00023	0	0.00122	0	0.66938	0	0	0	0	0.001616	0	0	0.017327
2-(5-HYDROXY-NAPHTHALEN-1-YL)-1,3-BENZOOXAZOL-6-OL	0.875521	0.976235	0.946879	1	1	1	0.588585	0	1	1	0.7	0.399476	1	1	0.740625
2-(6-{[(3-chloro-2-methylphenyl)sulfonyl]amino}pyridin-2-yl)-N,N-diethylacetamide	0.045684	0.654573	0.000338	0	0.481132	0	0.647987	0	0.017143	0	0	0	0	0	0.015341
2-(6-CHLORO-3-{[2,2-DIFLUORO-2-(1-OXIDO-2-PYRIDINYL)ETHYL]AMINO}-2-OXO-1(2H)-PYRAZINYL)-N-[(2-FLUOROPHENYL)METHYL]ACETAMIDE	0.999935	0.99999	0.999539	1	0.97412	1	0.974446	0.999238	1	1	1	0.997747	1	1	0.999074
2-(6-CHLORO-3-{[2,2-DIFLUORO-2-(2-PYRIDINYL)ETHYL]AMINO}-2-OXO-1(2H)-PYRAZINYL)-N-[(2-FLUORO-3-METHYL-6-PYRIDINYL)METHYL]ACETAMIDE	0.999935	0.99999	0.999539	1	0.97412	1	0.974446	0.999238	1	1	1	0.997747	1	1	0.999074
2-(6-CHLORO-3-{[2,2-DIFLUORO-2-(2-PYRIDINYL)ETHYL]AMINO}-2-OXO-1(2H)-PYRAZINYL)-N-[(2-FLUORO-6-PYRIDINYL)METHYL]ACETAMIDE	0.999935	0.99999	0.999539	1	0.97412	1	0.974446	0.999238	1	1	1	0.997747	1	1	0.999074
2-(6-HYDROXY-1,3-BENZOTHIAZOL-2-YL)-1,3-THIAZOL-4(5H)-ONE	0.662235	0.084079	0.02275	0	0	0	0.141816	0	0.017143	0	0	0.205834	0	0	0.29694
2-(6-methylpyridin-2-yl)-N-pyridin-4-ylquinazolin-4-amine	0.95321	0.850755	0.494224	1	0.5	0	0.415903	0	0	0	0.1	0.200711	0	1	0.549381
2-(Acetylamino)-2-Deoxy-6-O-Methyl-Alpha-D-Allopyranose	0.919526	0.332878	0.999888	1	0.975974	1	0.335054	0.99857	1	1	1	0.998851	1	1	0.972755
2-(Acetylamino)-2-Deoxy-a-D-Glucopyranose	0.00203	0	6e-06	0	0.279142	0	0	0	0	0	0	0.00077	0	0	0.000935
2-(Beta-D-Glucopyranosyl)-5-Methyl-1,2,3-Benzimidazole	0.996524	1	0.999568	1	0.984724	1	0.545622	0.999265	1	1	1	0.999127	1	1	0.998406
2-(Beta-D-Glucopyranosyl)-5-Methyl-1,3,4-Benzothiazole	0.996524	1	0.999568	1	0.984724	1	0.545622	0.999265	1	1	1	0.999127	1	1	0.998406
2-(Beta-D-Glucopyranosyl)-5-Methyl-1,3,4-Oxadiazole	0.996524	1	0.999568	1	0.984724	1	0.545622	0.999265	1	1	1	0.999127	1	1	0.998406
2-(Biphenyl-4-Sulfonyl)-1,2,3,4-Tetrahydro-Isoquinoline-3-Carboxylic Acid	0.999717	0.399433	0.999726	1	1	1	0.458535	0.999286	1	1	1	0.994331	1	1	0.997925
2-(Carboxymethoxy)-5-[(2s)-2-({(2s)-2-[(3-Carboxypropanoyl)Amino] -3-Phenylpropanoyl}Amino)-3-Oxo-3-(Pentylamino)Propyl]Benzoic Acid	0.345266	0.500198	0.001558	0	0.00122	0	0.419822	0	0	0	0	0.0021	0	0	0.116308
2-(CARBOXYMETHYL)-1-OXO-1,2-DIHYDRONAPHTHO[1,2-D]ISOTHIAZOLE-4-CARBOXYLIC ACID 3,3-DIOXIDE	0.905185	0.026104	0.997963	1	1	1	0.380321	0.999286	1	1	1	0.997541	1	1	0.966896
2-(cycloheptylmethyl)-1,1-dioxido-1-benzothiophen-6-yl sulfamate	0.97162	0.080163	0.999639	1	1	1	0.124021	0.999286	1	1	1	0.996794	1	1	0.989351
2-(cyclohexylamino)benzoic acid	0.999792	0.927125	0.994791	1	0.999476	1	0.544563	0.999286	1	1	1	0.999033	1	1	0.997872
2-(CYCLOHEXYLMETHYLAMINO)-4-(PHENYLAMINO)PYRAZOLO[1,5-A][1,3,5]TRIAZINE-8-CARBONITRILE	0.78872	0.817295	0.169705	0	0.00122	0	0.391675	0	0	0	0	0.199561	0	1	0.385996
2-(ETHOXYMETHYL)-4-(4-FLUOROPHENYL)-3-[2-(2-HYDROXYPHENOXY)PYRIMIDIN-4-YL]ISOXAZOL-5(2H)-ONE	0.999188	0.918861	0.988453	1	0.999476	1	0.519919	0.999286	1	1	1	0.977004	1	1	0.988215
2-(hydrazinocarbonyl)-3-phenyl-1H-indole-5-sulfonamide	0.96533	0.694746	0.99935	1	0.930826	1	0.161165	1	1	1	1	0.999573	1	1	0.988084
2-(methylamino)-N-(4-methyl-1,3-thiazol-2-yl)-5-[(4-methyl-4H-1,2,4-triazol-3-yl)sulfanyl]benzamide	0.058029	0	0	0	0.025	0	0	0	0	0	0	0.0012	0	0	0.019743
2-(methylsulfanyl)-5-(thiophen-2-ylmethyl)-1H-imidazol-4-ol	0.999792	0.927125	0.994791	1	0.999476	1	0.544563	0.999286	1	1	1	0.999033	1	1	0.997872
2-(N-Morpholino)-Ethanesulfonic Acid	0.305682	0.282667	0.000515	0	0.4375	0.013889	0.39732	0.020408	0.017143	0	0	0.105344	0.013889	0	0.13718
2-(Oxalyl-Amino)-4,5,6,7-Tetrahydro-Thieno[2,3-C]Pyridine-3-Carboxylic Acid	0.345266	0.500198	0.001558	0	0.00122	0	0.419822	0	0	0	0	0.0021	0	0	0.116308
2-(Oxalyl-Amino)-4,7-Dihydro-5h-Thieno[2,3-C]Pyran-3-Carboxylic Acid	0.345266	0.500198	0.001558	0	0.00122	0	0.419822	0	0	0	0	0.0021	0	0	0.116308
2-(Oxalyl-Amino)-4,7-Dihydro-5h-Thieno[2,3-C]Thiopyran-3-Carboxylic Acid	0.345266	0.500198	0.001558	0	0.00122	0	0.419822	0	0	0	0	0.0021	0	0	0.116308
2-(Oxalyl-Amino)-Benzoic Acid	0.345266	0.500198	0.001558	0	0.00122	0	0.419822	0	0	0	0	0.0021	0	0	0.116308
2-(Sec-Butyl)Thiazole	0.769578	0.14264	0.999781	0	1	1	0.256262	0.999286	1	1	0.9	0.312515	1	1	0.693958
2-(Thiomethylene)-4-Methylpentanoic Acid	0.205315	0.957245	0.001419	0	0.5	0	0.651009	0	0	0	0	0.202759	0	0	0.136498
2-[({2-[(1Z)-3-(DIMETHYLAMINO)PROP-1-ENYL]-4-FLUOROPHENYL}SULFONYL)AMINO]-5,6,7,8-TETRAHYDRONAPHTHALENE-1-CARBOXYLIC ACID	0.867287	0.03422	0.997868	1	1	1	0.340882	0.999286	1	1	1	0.997541	1	1	0.954232
2-[(1S)-1-BENZYL-2-SULFANYLETHYL]-1H-IMIDAZO[4,5-C]PYRIDIN-5-IUM	0.956888	0.99953	0.99637	1	0.971101	0.996753	0.12752	0.999325	0.996753	1	1	0.99875	0.996753	1	0.984003
2-[(2-chloro-4-iodophenyl)amino]-N-{[(2R)-2,3-dihydroxypropyl]oxy}-3,4-difluorobenzamide	0.99794	0.896444	0.983565	1	0.999476	1	0.475565	0.999286	1	1	1	0.799095	1	1	0.926867
2-[(2-methoxy-5-methylphenoxy)methyl]pyridine	0.251546	0	6e-06	0	0.247552	1	0	0	0	1	0.8	0.200552	1	0	0.150701
2-[(2-methoxyethyl)amino]-4-(4-oxo-1,2,3,4-tetrahydro-9H-carbazol-9-yl)benzamide	0.975003	0.561024	0.999938	1	0.978882	1	0.088065	1	1	1	1	0.999578	1	1	0.991506
2-[(2,4-DICHLOROBENZOYL)AMINO]-5-(PYRIMIDIN-2-YLOXY)BENZOIC ACID	0.563472	0.4733	0.000649	0	0.00122	0	0.374852	0	0	0	0	0.003654	0	0	0.189258
2-[(2',3',4'-TRIFLUOROBIPHENYL-2-YL)OXY]ETHANOL	0.999933	0.986804	0.999663	1	0.987796	1	0.615775	0.999274	1	1	1	0.998567	1	1	0.999388
2-[(4-ETHYNYL-2-FLUOROPHENYL)AMINO]-3,4-DIFLUORO-N-(2-HYDROXYETHOXY)BENZAMIDE	0.99794	0.896444	0.983565	1	0.999476	1	0.475565	0.999286	1	1	1	0.799095	1	1	0.926867
2-[(4-fluorophenyl)sulfonylamino]-N-oxo-ethanamide	0.999257	0.982467	0.999913	1	0.925015	1	0.687393	0.999177	1	1	1	0.99448	1	1	0.997884
2-[(5-hex-1-yn-1-ylfuran-2-yl)carbonyl]-N-methylhydrazinecarbothioamide	0.743724	0.45053	0.998806	1	0.981132	1	0.368621	0.999286	1	1	1	0.28618	1	1	0.676237
2-[(5,6-DIPHENYLFURO[2,3-D]PYRIMIDIN-4-YL)AMINO]ETHANOL	0.999792	0.927125	0.994791	1	0.999476	1	0.544563	0.999286	1	1	1	0.999033	1	1	0.997872
2-[(7-HYDROXY-NAPHTHALEN-1-YL)-OXALYL-AMINO]-BENZOIC ACID	0.345266	0.500198	0.001558	0	0.00122	0	0.419822	0	0	0	0	0.0021	0	0	0.116308
2-[(PHENYLSULFONYL)AMINO]-5,6,7,8-TETRAHYDRONAPHTHALENE-1-CARBOXYLIC ACID	0.867287	0.03422	0.997868	1	1	1	0.340882	0.999286	1	1	1	0.997541	1	1	0.954232
2-[1-(4-CHLOROBENZOYL)-5-METHOXY-2-METHYL-1H-INDOL-3-YL]-N-[(1R)-1-(HYDROXYMETHYL)PROPYL]ACETAMIDE	0.012883	0.894923	0.009021	0	0.00122	0	0.49062	0	0	0	0	0.001633	0	0	0.007846
2-[1-(4-CHLOROBENZOYL)-5-METHOXY-2-METHYL-1H-INDOL-3-YL]-N-[(1S)-1-(HYDROXYMETHYL)PROPYL]ACETAMIDE	0.012883	0.894923	0.009021	0	0.00122	0	0.49062	0	0	0	0	0.001633	0	0	0.007846
2-[2-(1,3-Dioxo-1,3-Dihydro-2h-Isoindol-2-Yl)Ethyl]-4-(4'-Ethoxy-1,1'-Biphenyl-4-Yl)-4-Oxobutanoic Acid	0.999257	0.982467	0.999913	1	0.925015	1	0.687393	0.999177	1	1	1	0.99448	1	1	0.997884
2-[2-(2-FLUOROPHENYL)PYRIDIN-4-YL]-1,5,6,7-TETRAHYDRO-4H-PYRROLO[3,2-C]PYRIDIN-4-ONE	0.995828	0.907587	0.929734	1	0.999476	1	0.492126	0.999286	1	1	1	0.2803	1	1	0.735288
2-[2-(4-CHLORO-PHENYLSULFANYL)-ACETYLAMINO]-3-(4-GUANIDINO-PHENYL)-PROPIONAMIDE	0.999935	0.99999	0.999539	1	0.97412	1	0.974446	0.999238	1	1	1	0.997747	1	1	0.999074
2-[2-ETHANESULFONYLAMINO-3-(1H-INDOL-3-YL)-PROPIONYLAMINO]-PENTANEDIOIC ACID 5-AMIDE 1-(4-CARBAMIM IDOYL-BENZYLAMIDE)	0.184204	0.962288	0.001503	0	0.00122	0	0.687901	0.999286	0	0	0	0.001616	0	0	0.062441
2-[2-ETHANESULFONYLAMINO-3-(5-PROPOXY-1H-INDOL-3-YL)-PROPIONYLAMINO]-PENTANEDIOIC ACID 5-AMIDE 1-(4-CARBAMIMIDOYL-BENZYLAMIDE)	0.184204	0.962288	0.001503	0	0.00122	0	0.687901	0.999286	0	0	0	0.001616	0	0	0.062441
2-[3-({Methyl[1-(2-Naphthoyl)Piperidin-4-Yl]Amino}Carbonyl)-2-Naphthyl]-1-(1-Naphthyl)-2-Oxoethylphosphonic Acid	0.000364	0.082822	2.1e-05	0	0.03229	0	0.300039	0	0	0	0	0.0013	0	0	0.000561
2-[3-(2-Hydroxy-1,1-Dihydroxymethyl-Ethylamino)-Propylamino]-2-Hydroxymethyl-Propane-1,3-Diol	0.99342	0.452086	0.999749	1	1	1	0.496969	0.999286	1	1	1	0.995551	1	1	0.99624
2-[3-(5-MERCAPTO-[1,3,4]THIADIAZOL-2-YL)-UREIDO]-N-METHYL-3-PHENYL-PROPIONAMIDE	0.999569	0.970649	0.99988	1	0.971491	1	0.473354	0.999123	0.991379	1	1	0.995953	1	1	0.998467
2-[3-(5-MERCAPTO-[1,3,4]THIADIAZOL-2YL)-UREIDO]-N-METHYL-3-PENTAFLUOROPHENYL-PROPIONAMIDE	0.999569	0.970649	0.99988	1	0.971491	1	0.473354	0.999123	0.991379	1	1	0.995953	1	1	0.998467
2-[3,4-Dihydroxy-2-Hydroxymethyl-5-(2-Hydroxy-Nonyl)-Tetrahydro-Furan-2-Yloxy]-6-Hydroxymethyl-Tetra Hydro-Pyran-3,4,5-Triol	0.02522	1	1.7e-05	0	0.173496	0	0.501895	0	0	0	0	0.395955	0	0	0.140397
2-[4-({[(3,5-DICHLOROPHENYL)AMINO]CARBONYL}AMINO)PHENOXY]-2-METHYLPROPANOIC ACID	0.933033	0.028431	0.99795	1	1	1	0.365237	0.999286	1	1	1	0.997541	1	1	0.976174
2-[4-(2,4-Dichlorophenoxy)Phenoxy]Propanoic Acid	0.99963	0.934348	0.999988	1	0.687307	1	0.761824	1	1	1	1	0.997794	1	1	0.999137
2-[4-(3-METHYL-1H-PYRAZOL-4-YL)PHENYL]ETHANAMINE	0.00733	0.104497	0.00248	0	0.026944	0.013889	0.398379	0.020408	0.017143	0	0	0.012804	0.013889	0	0.007538
2-[4-(4-Chlorophenyl)Cyclohexylidene]-3,4-Dihydroxy-1(2h)-Naphthalenone	0.076201	0	0.997372	0	0	0	0	0.002606	0	0	0	0.2	0	1	0.424524
2-[4-(4-Hydroxy-3-Isopropyl-Phenoxy)-3,5-Dimethyl-Phenyl]-2h-[1,2,4]Triazine-3,5-Dione	0.005726	0.102552	0.001566	0	0.002994	0	0.137391	0	0	0	0	0.003243	0	0	0.003512
2-[4-(DIMETHYLAMINO)PHENYL]-6-HYDROXY-3-METHYL-1,3-BENZOTHIAZOL-3-IUM	0.997365	0.375522	0.998594	1	1	1	0.445619	0.999286	1	1	1	0.993723	1	1	0.996561
2-[4-[[(S)-1-[[(S)-2-[[(Rs)-3,3,3-Trifluoro-1-Isopropyl-2-Oxopropyl]Aminocarbonyl]Pyrrolidin-1-Yl-]Carbonyl]-2-Methylpropyl]Aminocarbonyl]Benzoylamino]Acetic Acid	0.119991	0.438468	9.1e-05	0	0.00122	0	0.37844	0	0	0	0	0.003654	0	0	0.041245
2-[5-Methanesulfonylamino-2-(4-Aminophenyl)-6-Oxo-1,6-Dihydro-1-Pyrimidinyl]-N-(3,3,3-Trifluoro-1-Isopropyl-2-Oxopropyl)Acetamide	0.000424	0.114026	2.1e-05	0	0.03229	0	0.405136	0	0	0	0	0.0013	0	0	0.000582
2-[5,6-BIS-(4-METHOXY-PHENYL)-FURO[2,3-D]PYRIMIDIN-4-YLAMINO]-ETHANOL	0.999792	0.927125	0.994791	1	0.999476	1	0.544563	0.999286	1	1	1	0.999033	1	1	0.997872
2-[METHYL-(5-GERANYL-4-METHYL-PENT-3-ENYL)-AMINO]-ETHYL-DIPHOSPHATE	0.024538	0.107853	7.4e-05	0	0.051587	0.013889	0.375641	0.020408	0.017143	0	0	0.0021	0.013889	0	0.008904
2-[N'-(4-AMINO-BUTYL)-HYDRAZINOCARBONYL]-PYRROLIDINE-1-CARBOXYLIC ACID BENZYL ESTER	0.999935	0.99999	0.999539	1	0.97412	1	0.974446	0.999238	1	1	1	0.997747	1	1	0.999074
2-[Trans-(4-Aminocyclohexyl)Amino]-6-(Benzyl-Amino)-9-Cyclopentylpurine	0.999419	0.915219	0.996361	1	0.966712	1	0.548806	1	1	1	1	0.999213	1	1	0.998331
2-{[(1R,2S)-2-aminocyclohexyl]amino}-4-[(3-methylphenyl)amino]pyrimidine-5-carboxamide	0.999987	0.956804	0.996044	1	0.999476	1	0.585079	0.999286	1	1	1	0.999033	1	1	0.998355
2-{[(2E)-3-(3,4-dimethoxyphenyl)prop-2-enoyl]amino}benzoic acid	0.815865	0.217406	0.999924	1	1	1	0.334896	0.999286	1	1	0.9	0.802334	1	1	0.872708
2-{[(6-OXO-1,6-DIHYDROPYRIDIN-3-YL)METHYL]AMINO}-N-[4-PROPYL-3-(TRIFLUOROMETHYL)PHENYL]BENZAMIDE	0.998357	0.999979	0.999969	1	0.798239	1	0.856163	0.999266	1	1	1	0.999224	1	1	0.999183
2-{[4-(1-methyl-4-pyridin-4-yl-1H-pyrazol-3-yl)phenoxy]methyl}quinoline	0.97248	0.080932	0.851396	1	1	1	0.137506	0.999286	1	1	1	0.576749	1	1	0.800208
2-{[4-(4-pyridin-4-yl-1H-pyrazol-3-yl)phenoxy]methyl}quinoline	0.9714	0.583448	0.999023	1	0.800284	1	0.171594	1	1	1	1	0.999573	1	1	0.989998
2-{[Formyl(Hydroxy)Amino]Methyl}-4-Methylpentanoic Acid	0.998754	0.563644	0.999264	1	0.571429	1	0.502312	0.999286	1	1	1	0.988148	1	1	0.995389
2-{2-[(3,5-dimethylphenyl)amino]pyrimidin-4-yl}-N-[(1S)-2-hydroxy-1-methylethyl]-4-methyl-1,3-thiazole-5-carboxamide	0.999987	0.956804	0.996044	1	0.999476	1	0.585079	0.999286	1	1	1	0.999033	1	1	0.998355
2-{3-[(2S)-4,4-difluoro-2-(pyrrolidin-1-ylcarbonyl)pyrrolidin-1-yl]-3-oxopropyl}-isoindole-1,3(2H)-dione	0.966956	0.077019	0.999998	1	1	1	0.070447	0.999286	1	1	1	0.996794	1	1	0.987916
2-{3-[4-(4-Fluorophenyl)-3,6-Dihydro-1(2h)-Pyridinyl]Propyl}-8-Methyl-4(3h)-Quinazolinone	0.999579	0.781942	0.999978	1	0.912073	1	0.647828	1	1	1	1	0.997794	1	1	0.999117
2-{4-[(2s)-2-[({[(1s)-1-Carboxy-2-Phenylethyl]Amino}Carbonyl)Amino]-3-Oxo-3-(Pentylamino)Propyl]Phenoxy}Malonic Acid	0.345266	0.500198	0.001558	0	0.00122	0	0.419822	0	0	0	0	0.0021	0	0	0.116308
2-{4-[(3,5-DIMETHYLANILINO)-CARBONYL-METHYL]-PHENOXY}-2-METHYLPROPIONIC ACID	0.933033	0.028431	0.99795	1	1	1	0.365237	0.999286	1	1	1	0.997541	1	1	0.976174
2-{4-[(4-imidazo[1,2-a]pyridin-3-ylpyrimidin-2-yl)amino]piperidin-1-yl}-N-methylacetamide	0.998372	0.908707	0.9851	1	0.999476	1	0.495373	0.999286	1	1	1	0.898481	1	1	0.960651
2-{4-[4-({4-[2-methyl-1-(1-methylethyl)-1H-imidazol-5-yl]pyrimidin-2-yl}amino)phenyl]piperazin-1-yl}-2-oxoethanol	0.999975	0.934425	0.998387	1	0.999476	1	0.566291	0.999286	1	1	1	0.999033	1	1	0.999132
2-{4-[4-(4-Chloro-Phenoxy)-Benzenesulfonyl]-Tetrahydro-Pyran-4-Yl}-N-Hydroxy-Acetamide	0.999616	0.408845	0.999706	1	1	1	0.460959	0.999286	1	1	1	0.994331	1	1	0.997884
2-{4-[5-(4-chlorophenyl)-4-pyrimidin-4-yl-1H-pyrazol-3-yl]piperidin-1-yl}-2-oxoethanol	0.999188	0.918861	0.988453	1	0.999476	1	0.519919	0.999286	1	1	1	0.977004	1	1	0.988215
2-{5-[3-(6-BENZOYL-1-PROPYLNAPHTHALEN-2-YLOXY)PROPOXY]INDOL-1-YL}ETHANOIC ACID	0.005726	0.102552	0.001566	0	0.002994	0	0.137391	0	0	0	0	0.003243	0	0	0.003512
2-{5-[3-(7-PROPYL-3-TRIFLUOROMETHYLBENZO[D]ISOXAZOL-6-YLOXY)PROPOXY]INDOL-1-YL}ETHANOIC ACID	0.005726	0.102552	0.001566	0	0.002994	0	0.137391	0	0	0	0	0.003243	0	0	0.003512
2-ACETAMIDO-2-DEOXY-BETA-D-GLUCOPYRANOSE(BETA1-4)-2-ACETAMIDO-1,6-ANHYDRO-3-O-[(R)-1-CARBOXYETHYL]-2-DEOXY-BETA-D-GLUCOPYRANOSE-L-ALANYL-GAMMA-D-GLUTAMYL-MESO-DIAMINOPIMELYL-D-ALANINE	0.995758	1	0.999484	1	0.989434	1	0.525502	1	1	1	1	1	1	1	0.998414
2-Acetamido-2-Deoxy-D-Glucono-1,5-Lactone	0.201789	0.100888	0.001143	0	0	0	0.135976	0	0	0	0	0.002044	0	0	0.068325
2-ACETYLAMINO-4-METHYL-PENTANOIC ACID (1-FORMYL-2-PHENYL-ETHYL)-AMIDE	0.119991	0.438468	9.1e-05	0	0.00122	0	0.37844	0	0	0	0	0.003654	0	0	0.041245
2-ACETYLAMINO-4-METHYL-PENTANOIC ACID [1-(1-FORMYL-PENTYLCARBAMOYL)-3-METHYL-BUTYL]-AMIDE	0.893574	1	3.5e-05	1	0.930826	1	0.55117	1	1	1	1	0.9	1	0	0.59787
2-AMINO-1-METHYL-6-PHENYLIMIDAZO[4,5-B]PYRIDINE	0.971079	0.978173	0.993831	1	1	1	0.581598	0.999286	1	1	0.8	0.499476	1	1	0.821462
2-Amino-3-(3-Hydroxy-7,8-Dihydro-6h-Cyclohepta[D]-4-Isoxazolyl)Propionic Acid	0.008333	0.122891	0.695847	0	1	1	0.18628	0.999286	1	1	0.4	0.00907	1	0	0.23775
2-Amino-3-(5-Tert-Butyl-3-(Phosphonomethoxy)-4-Isoxazolyl)Propionic Acid	0.008333	0.122891	0.695847	0	1	1	0.18628	0.999286	1	1	0.4	0.00907	1	0	0.23775
2-Amino-3-Hydroxy-3-Phosphonooxy-Propionic Acid	0.99906	0.761874	0.999984	1	0.807659	1	0.759314	1	1	1	0.9	0.997794	1	1	0.998946
2-Amino-3-Methyl-1-Pyrrolidin-1-Yl-Butan-1-One	0.995526	0.557523	1	1	0.75	1	0.776382	0.998502	1	1	1	0.998289	1	1	0.997938
2-Amino-3-Oxo-4-Sulfo-Butyric Acid	0.999693	0.794549	0.99998	1	0.807659	1	0.725256	1	1	1	0.8	0.997794	1	1	0.999156
2-AMINO-4-(2,4-DICHLOROPHENYL)-N-ETHYLTHIENO[2,3-D]PYRIMIDINE-6-CARBOXAMIDE	0.975003	0.561024	0.999938	1	0.978882	1	0.088065	1	1	1	1	0.999578	1	1	0.991506
2-amino-4-[2,4-dichloro-5-(2-pyrrolidin-1-ylethoxy)phenyl]-N-ethylthieno[2,3-d]pyrimidine-6-carboxamide	0.975003	0.561024	0.999938	1	0.978882	1	0.088065	1	1	1	1	0.999578	1	1	0.991506
2-AMINO-4-FLUORO-5-[(1-METHYL-1H-IMIDAZOL-2-YL)SULFANYL]-N-(1,3-THIAZOL-2-YL)BENZAMIDE	0.058029	0	0	0	0.025	0	0	0	0	0	0	0.0012	0	0	0.019743
2-amino-5-[3-(1-ethyl-1H-pyrazol-5-yl)-1H-pyrrolo[2,3-b]pyridin-5-yl]-N,N-dimethylbenzamide	0.999999	1	0.999998	1	0.974325	1	0.960404	0.999235	1	1	1	0.999317	1	1	0.999771
2-Amino-5-Hydroxy-Benzimidazole	0.026626	0.939436	0.00011	0	0.00122	0	0.635348	0	0	0	0	0.001616	0	0	0.00945
2-amino-6-[2-(1H-indol-6-yl)ethyl]pyrimidin-4(3H)-one	0.921542	0.030615	0.997929	1	1	1	0.356023	0.999286	1	1	1	0.997541	1	1	0.972337
2-Amino-6-Chloropyrazine	0.999975	0.934425	0.998387	1	0.999476	1	0.566291	0.999286	1	1	1	0.999033	1	1	0.999132
2-Amino-7-[2-(2-Hydroxy-1-Hydroxymethyl-Ethylamino)-Ethyl]-1,7-Dihydro-Purin-6-One	0.996233	1	0.998909	1	0.994055	0.996441	0.426316	0.998557	0.996441	1	1	1	0.996441	1	0.998381
2-amino-N-(4-methyl-1,3-thiazol-2-yl)-5-[(4-methyl-4H-1,2,4-triazol-3-yl)sulfanyl]benzamide	0.058029	0	0	0	0.025	0	0	0	0	0	0	0.0012	0	0	0.019743
2-Amino-N,3,3-Trimethylbutanamide	0.998754	0.563644	0.999264	1	0.571429	1	0.502312	0.999286	1	1	1	0.988148	1	1	0.995389
2-Amino-Pentanoic Acid	0.96377	0.272802	0.999998	1	1	1	0.03248	0	1	1	0.9	0.995176	1	1	0.986315
2-Aminobenzoic Acid	0.01158	0.20026	6.1e-05	0	0.051587	0.013889	0.279105	0.020408	0.017143	0	0	0.105636	0.013889	0	0.039092
2-Aminoethanimidic Acid	0.999235	0.438986	0.999995	1	1	1	0.468041	0.999286	1	1	1	0.995027	1	1	0.998086
2-Aminothiazoline	0.999458	0.460081	0.999998	1	1	1	0.409552	0.999286	1	1	1	0.995027	1	1	0.998161
2-ANILINO-6-CYCLOHEXYLMETHOXYPURINE	0.011665	0.235699	0.000123	0	0.001865	0	0.593937	0	0	0	0	0.0013	0	0	0.004363
2-Benzyl-3-Iodopropanoic Acid	0.998697	0.364762	0.999907	1	1	1	0.444294	0.999286	1	1	1	0.995551	1	1	0.998052
2-Bromoacetyl Group	0.012883	0.894923	0.009021	0	0.00122	0	0.49062	0	0	0	0	0.001633	0	0	0.007846
2-CHLORO-4-[(7R,7AS)-7-HYDROXY-1,3-DIOXOTETRAHYDRO-1H-PYRROLO[1,2-C]IMIDAZOL-2(3H)-YL]-3-METHYLBENZONITRILE	0.799438	0.999876	0.478896	0	0.757728	1	0.903423	0	1	1	0.6	0.799179	1	1	0.692504
2-chloro-4-{[(1R,3Z,7S,7aS)-7-hydroxy-1-(trifluoromethyl)tetrahydro-1H-pyrrolo[1,2-c][1,3]oxazol-3-ylidene]amino}-3-methylbenzonitrile	0.799438	0.999876	0.478896	0	0.757728	1	0.903423	0	1	1	0.6	0.799179	1	1	0.692504
2-CHLORO-5-(3-CHLORO-PHENYL)-6-[(4-CYANO-PHENYL)-(3-METHYL-3H-IMIDAZOL-4-YL)- METHOXYMETHYL]-NICOTINONITRILE	0.150595	0.995069	0.999214	0	0.633119	1	0.564667	1	1	1	0.9	0.304118	1	1	0.484642
2-chloro-5-[(1S)-1-hydroxy-3-oxo-2H-isoindol-1-yl]benzenesulfonamide	0.96533	0.694746	0.99935	1	0.930826	1	0.161165	1	1	1	1	0.999573	1	1	0.988084
2-chloro-5-nitro-N-phenylbenzamide	0.563472	0.4733	0.000649	0	0.00122	0	0.374852	0	0	0	0	0.003654	0	0	0.189258
2-CHLORO-N-[(1R,2R)-1-HYDROXY-2,3-DIHYDRO-1H-INDEN-2-YL]-6H-THIENO[2,3-B]PYRROLE-5-CARBOXAMIDE	0.996524	1	0.999568	1	0.984724	1	0.545622	0.999265	1	1	1	0.999127	1	1	0.998406
2-CHLORO-N-[(3R)-2-OXO-1,2,3,4-TETRAHYDROQUINOLIN-3-YL]-6H-THIENO[2,3-B]PYRROLE-5-CARBOXAMIDE	0.996524	1	0.999568	1	0.984724	1	0.545622	0.999265	1	1	1	0.999127	1	1	0.998406
2-Chlorodideoxyadenosine	0.993337	0.091628	0.999989	1	1	1	0.121278	0.999286	1	1	1	0.996794	1	1	0.996707
2-Chlorophenol	0.997361	0.999946	0.939513	1	0.612763	1	0.662193	0.997619	1	1	1	0.999901	1	1	0.978925
2-Cyclopropylmethylenepropanal	0.003594	0	0	0	0.068204	0	0	0	0	0	0	0.000672	0	0	0.001422
2-Deoxy-2-Amino Glucitol-6-Phosphate	0.566782	0.057498	0.993996	1	1	1	0.276611	0.999286	1	1	1	1	1	1	0.853593
2-Deoxy-2-Aminogalactose	0.981947	0.081821	0.999788	1	1	1	0.125926	0.999286	1	1	1	0.996794	1	1	0.992843
2-Deoxy-2-Fluoro-Alpha-D-Mannosyl Fluoride	0.680447	0.04891	0.997011	1	1	1	0.30899	0.999286	1	1	1	0.997541	1	1	0.891666
2-Deoxy-2,3-Dehydro-N-Acetyl-Neuraminic Acid	0.983176	0.154326	0.999998	1	1	1	0.071564	0.999286	1	1	1	0.995176	1	1	0.992784
2-Deoxy-2fluoro-Glucose	0.680447	0.04891	0.997011	1	1	1	0.30899	0.999286	1	1	1	0.997541	1	1	0.891666
2-DEOXY-3,4-BIS-O-[3-(4-HYDROXYPHENYL)PROPANOYL]-L-THREO-PENTARIC ACID	0.996524	1	0.999568	1	0.984724	1	0.545622	0.999265	1	1	1	0.999127	1	1	0.998406
2-Deoxy-Glucose-6-Phosphate	0.001343	0	0.000605	0	0.042886	0	0	0.012346	0.010526	0	0	0.001102	0	0	0.001017
2-Ethoxyethanol	0.918946	0.672559	0.999322	1	0.930826	1	0.168801	1	1	1	1	0.999573	1	1	0.972614
2-fluoro-4-[4-(4-fluorophenyl)-1H-pyrazol-3-yl]pyridine	0.999188	0.918861	0.988453	1	0.999476	1	0.519919	0.999286	1	1	1	0.977004	1	1	0.988215
2-fluoro-6-{[2-({2-methoxy-4-[(methylsulfonyl)methyl]phenyl}amino)-7H-pyrrolo[2,3-d]pyrimidin-4-yl]amino}benzamide	0.925159	0.999542	0.83566	1	0.502445	1	0.556136	1	1	1	0.7	0.303204	1	1	0.688007
2-Hexyloxy-6-Hydroxymethyl-Tetrahydro-Pyran-3,4,5-Triol	0.558213	0.059419	0.991111	1	1	1	0.276726	0.999286	1	1	1	0.955	1	1	0.834775
2-Hexyloxy-6-Hydroxymethyl-Tetrahydro-Pyran-3,5-Diol	0.373377	0.079794	0.89779	1	1	1	0.245342	0.999286	1	1	0.7	0.856144	1	1	0.709103
2-HYDROXY-3,5-DIIODOBENZOIC ACID	0.009689	0.172939	0.995844	0	0.492754	0	0.450837	0	0	0	0	0.410345	0	0	0.471959
2-HYDROXY-5-(2-MERCAPTO-ETHYLSULFAMOYL)-BENZOIC ACID	0.986005	0.082411	0.999984	1	1	1	0.116636	0.999286	1	1	1	0.996794	1	1	0.994261
2-Hydroxy-5-[4-(2-Hydroxy-Ethyl)-Piperidin-1-Yl]-5-Phenyl-1h-Pyrimidine-4,6-Dione	0.999717	0.399433	0.999726	1	1	1	0.458535	0.999286	1	1	1	0.994331	1	1	0.997925
2-Hydroxyethyl Disulfide	0.981756	0.316283	0.997532	1	1	1	0.425017	0.999286	1	1	1	0.992793	1	1	0.990694
2-HYDROXYMETHYL-6-OCTYLSULFANYL-TETRAHYDRO-PYRAN-3,4,5-TRIOL	0.003622	0.124376	0.489396	0	0.02	0	0.436988	0	0	0	0	0.410345	0	0	0.301121
2-IMINO-5-(1-PYRIDIN-2-YL-METH-(E)-YLIDENE)-1,3-THIAZOLIDIN-4-ONE	0.999975	0.934425	0.998387	1	0.999476	1	0.566291	0.999286	1	1	1	0.999033	1	1	0.999132
2-Isobutyl-3-Methoxypyrazine	0.769578	0.14264	0.999781	0	1	1	0.256262	0.999286	1	1	0.9	0.312515	1	1	0.693958
2-MERCAPTO-N-[1,2,3,10-TETRAMETHOXY-9-OXO-5,6,7,9-TETRAHYDRO-BENZO[A]HEPTALEN-7-YL]ACETAMIDE	0.579216	0.043237	0.997321	1	0.544643	1	0.392431	0.020408	0.017143	0	0.7	0.607268	1	1	0.727935
2-Methoxy-3-Isopropylpyrazine	0.769578	0.14264	0.999781	0	1	1	0.256262	0.999286	1	1	0.9	0.312515	1	1	0.693958
2-METHYL-2-(4-{[({4-METHYL-2-[4-(TRIFLUOROMETHYL)PHENYL]-1,3-THIAZOL-5-YL}CARBONYL)AMINO]METHYL}PHENOXY)PROPANOIC ACID	0.087077	0.514394	0.000148	0	0.00122	0	0.323756	0	0	0	0	0.103654	0	0	0.063626
2-Methyl-2-Propanol	0.050042	0.078992	0.990154	1	0.051587	0.013889	0.464019	0.020408	0.017143	0	0	0.507804	0.013889	0	0.516
2-Methyl-3-(2-Aminothiazolo)Propanal	0.003594	0	0	0	0.068204	0	0	0	0	0	0	0.000672	0	0	0.001422
2-methyl-3,5,7,8-tetrahydro-4H-thiopyrano[4,3-d]pyrimidin-4-one	0.996058	0.395954	0.999997	1	1	1	0.422891	0.999286	1	1	1	0.995027	1	1	0.997027
2-NAPHTHALENESULFONIC ACID	0.043774	0.691547	7.8e-05	0	0.00122	0	0.442096	0	0	0	0	0.003654	0	0	0.015835
2-NONYL-4-HYDROXYQUINOLINE N-OXIDE	0.598261	0.054879	0.99434	1	1	1	0.287522	0.999286	1	1	1	0.955	1	1	0.8492
2-O-(3'-AMIDINOPHENYL)-5-O-(4''-AMIDINOPHENYL}-1,4:3,6-DIANHYDRO-D-SORBITOL	0.000364	0.082822	2.1e-05	0	0.03229	0	0.300039	0	0	0	0	0.0013	0	0	0.000561
2-O-(4'-AMIDINOPHENYL)-5-O-(3''-AMIDINOPHENYL)-1,4:3,6-DIANHYDRO-D-SORBITOL	0.064259	0.326457	8.4e-05	0	0.00122	0	0.294827	0	0	0	0	0.003654	0	0	0.022665
2-Phenyl-1-[4-(2-Piperidin-1-Yl-Ethoxy)-Phenyl]-1,2,3,4-Tetrahydro-Isoquinolin-6-Ol	1	0.999429	1	1	0.504132	1	0.861328	0.997226	1	1	1	1	1	1	1
2-PHENYL-4H-BENZO[H]CHROMEN-4-ONE	7.9e-05	0.826487	1e-06	0	0.001935	0	0.251816	0	0	0	0	0.001219	0	0	0.000433
2-Phenylethylamine	0.064259	0.326457	8.4e-05	0	0.00122	0	0.294827	0	0	0	0	0.003654	0	0	0.022665
2-Phenylheme	0.201789	0.100888	0.001143	0	0	0	0.135976	0	0	0	0	0.002044	0	0	0.068325
2-Phospho-D-Glyceric Acid	0.553765	0.060131	0.993962	1	1	1	0.286314	0.999286	1	1	1	1	1	1	0.849242
2-Phosphoglycolic Acid	0.996355	1	0.999484	1	0.989434	1	0.448782	1	1	1	1	1	1	1	0.998613
2-Pyridinethiol	0.999235	0.438986	0.999995	1	1	1	0.468041	0.999286	1	1	1	0.995027	1	1	0.998086
2-Thiomethyl-3-Phenylpropanoic Acid	0.999717	0.399433	0.999726	1	1	1	0.458535	0.999286	1	1	1	0.994331	1	1	0.997925
2,2,2-TRIFLUORO-1-{5-[(3-PHENYL-5,6-DIHYDROIMIDAZO[1,2-A]PYRAZIN-7(8H)-YL)CARBONYL]THIOPHEN-2-YL}ETHANE-1,1-DIOL	0.988622	0.985363	0.999815	1	1	1	0.578028	0.999286	1	1	0.9	0.999476	1	1	0.995971
2,2,5,5-TETRAMETHYL-3-(SULFANYLMETHYL)-2,5-DIHYDRO-1H-PYRROL-1-OL	0.006283	0.120803	0.025736	0	0.026944	0.013889	0.425734	0.020408	0.017143	0	0	0.012804	0.013889	0	0.014941
2,2'-{[9-(HYDROXYIMINO)-9H-FLUORENE-2,7-DIYL]BIS(OXY)}DIACETIC ACID	0.999792	0.927125	0.994791	1	0.999476	1	0.544563	0.999286	1	1	1	0.999033	1	1	0.997872
2,3-Dicarboxy-4-(2-Chloro-Phenyl)-1-Ethyl-5-Isopropoxycarbonyl-6-Methyl-Pyridinium	0.996524	1	0.999568	1	0.984724	1	0.545622	0.999265	1	1	1	0.999127	1	1	0.998406
2,3-Difluorobenzyl Alcohol	0.933567	0.080752	0.992211	1	1	1	0.132051	0.999286	1	1	0.8	0.996794	1	1	0.974191
2,3-Dihydroxy-Benzoic Acid	0.769578	0.14264	0.999781	0	1	1	0.256262	0.999286	1	1	0.9	0.312515	1	1	0.693958
2,3-DIMETHOXY-12H-[1,3]DIOXOLO[5,6]INDENO[1,2-C]ISOQUINOLIN-6-IUM	0.998968	0.925938	1	1	1	1	0.765585	0.999298	1	1	1	0.996895	1	1	0.998621
2,3-diphenyl-1H-indole-7-carboxylic acid	0.96579	0.867233	0.563064	1	0.5	0	0.444671	0.999286	0	0	0	0.200711	0	1	0.576522
2,3-DIPHENYL-N-(2-PIPERAZIN-1-YLETHYL)FURO[2,3-B]PYRIDIN-4-AMINE	1	0.984303	0.999943	1	0.999476	1	0.711016	0.999286	1	1	1	0.999033	1	1	0.999659
2,3,-Dihydroxybenzoylserine	0.769578	0.14264	0.999781	0	1	1	0.256262	0.999286	1	1	0.9	0.312515	1	1	0.693958
2,3,4,5,6-Pentafluorobenzyl Alcohol	0.933567	0.080752	0.992211	1	1	1	0.132051	0.999286	1	1	0.8	0.996794	1	1	0.974191
2,3,5,6-Tetrafluoro-4-Methoxy-Benzamide	0.637977	0.98012	0.124785	0	0	0	0.629539	0	0	0	0.2	0.400233	0	0	0.387665
2,3,6A,7,8,9-HEXAHYDRO-11H-[1,4]DIOXINO[2,3-G]PYRROLO[2,1-B][1,3]BENZOXAZIN-11-ONE	0.008333	0.122891	0.695847	0	1	1	0.18628	0.999286	1	1	0.4	0.00907	1	0	0.23775
2,3,7,8-tetrahydroxychromeno[5,4,3-cde]chromene-5,10-dione	0.78872	0.817295	0.169705	0	0.00122	0	0.391675	0	0	0	0	0.199561	0	1	0.385996
2,4-Diamino-5-(3,4,5-Trimethoxy-Benzyl)-Pyrimidin-1-Ium	0.991799	1	1	1	0.972677	0.995074	0.194858	0.999284	0.995074	1	1	1	0.995074	1	0.997266
2,4-Diamino-5-Methyl-6-[(3,4,5-Trimethoxy-N-Methylanilino)Methyl]Pyrido[2,3-D]Pyrimidine	0.991799	1	1	1	0.972677	0.995074	0.194858	0.999284	0.995074	1	1	1	0.995074	1	0.997266
2,4-Diamino-6-[N-(2',5'-Dimethoxybenzyl)-N-Methylamino]Quinazoline	0.991799	1	1	1	0.972677	0.995074	0.194858	0.999284	0.995074	1	1	1	0.995074	1	0.997266
2,4-Diamino-6-[N-(3',4',5'-Trimethoxybenzyl)-N-Methylamino]Pyrido[2,3-D]Pyrimidine	0.991799	1	1	1	0.972677	0.995074	0.194858	0.999284	0.995074	1	1	1	0.995074	1	0.997266
2,4-Diamino-6-[N-(3',5'-Dimethoxybenzyl)-N-Methylamino]Pyrido[2,3-D]Pyrimidine	0.991799	1	1	1	0.972677	0.995074	0.194858	0.999284	0.995074	1	1	1	0.995074	1	0.997266
2,4-Diamino-6-Phenyl-5,6,7,8,-Tetrahydropteridine	0.999458	0.460081	0.999998	1	1	1	0.409552	0.999286	1	1	1	0.995027	1	1	0.998161
2,4-Difluorobenzyl Alcohol 2,4-Difluoro-1-(Hydroxymethyl)Benzene	0.933567	0.080752	0.992211	1	1	1	0.132051	0.999286	1	1	0.8	0.996794	1	1	0.974191
2,4-Dihydroxy-7-(Methyloxy)-2h-1,4-Benzoxazin-3(4h)-One	0.680447	0.04891	0.997011	1	1	1	0.30899	0.999286	1	1	1	0.997541	1	1	0.891666
2,4-Dihydroxy-Trans Cinnamic Acid	0.119991	0.438468	9.1e-05	0	0.00122	0	0.37844	0	0	0	0	0.003654	0	0	0.041245
2,4,6-Triaminoquinazoline	0.085546	0.637927	0.000529	0	0.481132	0	0.633074	0	0.017143	0	0	0.185714	0	0	0.090596
2,5-Anhydroglucitol-1,6-Biphosphate	0.201789	0.100888	0.001143	0	0	0	0.135976	0	0	0	0	0.002044	0	0	0.068325
2,5-bis-o-{3-[amino(imino)methyl]phenyl}-1,4:3,6-dianhydro-d-glucitol	0.064259	0.326457	8.4e-05	0	0.00122	0	0.294827	0	0	0	0	0.003654	0	0	0.022665
2,5-DI-(TERT-BUTYL)-1,4,BENZOHYDROQUINONE	0.027957	0.435905	0.038041	0	0	0	0.50514	0	0.017143	0	0	0.013969	0	0	0.026656
2,5-Diaziridin-1-Yl-3-(Hydroxymethyl)-6-Methylcyclohexa-2,5-Diene-1,4-Dione	0.201789	0.100888	0.001143	0	0	0	0.135976	0	0	0	0	0.002044	0	0	0.068325
2,5-DICHLORO-N-(5-CHLORO-1,3-BENZOXAZOL-2-YL)BENZENESULFONAMIDE	0.201789	0.100888	0.001143	0	0	0	0.135976	0	0	0	0	0.002044	0	0	0.068325
2,5-DICHLORO-N-[5-METHOXY-7-(6-METHOXYPYRIDIN-3-YL)-1,3-BENZOXAZOL-2-YL]BENZENESULFONAMIDE	0.996338	1	0.999484	1	0.989434	1	0.379816	1	1	1	1	1	1	1	0.998607
2,5-O,O-BIS-{4',4''-AMIDINOPHENYL}-1,4:3,6-DIANHYDRO-D-SORBITOL	0.058794	0.099107	0.000153	0	0.059217	0.003466	0.288189	0.023952	0	0	0	0.003757	0.003466	0	0.020901
2,6-Diamino-(S)-9-[2-(Phosphonomethoxy)Propyl]Purine	0.996233	1	0.998909	1	0.994055	0.996441	0.426316	0.998557	0.996441	1	1	1	0.996441	1	0.998381
2,6-Diamino-Hexanoic Acid Amide	0.319928	0.095729	0.996308	1	1	1	0.473685	0.999286	1	1	1	0.401155	1	1	0.572464
2,6-DICARBOXYNAPHTHALENE	0.933033	0.028431	0.99795	1	1	1	0.365237	0.999286	1	1	1	0.997541	1	1	0.976174
2,6-Difluorobenzenesulfonamide	0.97162	0.080163	0.999639	1	1	1	0.124021	0.999286	1	1	1	0.996794	1	1	0.989351
2,6-Dihydroanthra/1,9-Cd/Pyrazol-6-One	0.999337	0.943124	0.970535	1	0.999476	1	0.547865	0.999286	1	1	1	0.899499	1	1	0.956457
2,6,8-Trimethyl-3-Amino-9-Benzyl-9-Methoxynonanoic Acid	0.661061	0.122502	0.999836	0	1	1	0.202705	0.999286	1	1	1	0.404363	1	1	0.68842
2'-deoxy-N-(naphthalen-1-ylmethyl)guanosine 5'-(dihydrogen phosphate)	0.988474	0.154813	0.999998	1	1	1	0.071917	0.999286	1	1	1	0.995176	1	1	0.99455
2'-Deoxyadenosine 5'-Triphosphate	0.553765	0.060131	0.993962	1	1	1	0.286314	0.999286	1	1	1	1	1	1	0.849242
2'-Deoxycytidine	0.451713	0.077441	0.976274	1	1	1	0.316087	0.999286	1	1	1	0.775922	1	1	0.734637
2'-Deoxycytidine-2'-Deoxyadenosine-3',5'-Monophosphate	0.845504	0.038969	0.997951	1	1	1	0.469126	0.999286	1	1	1	0.997541	1	1	0.946999
2'-Deoxyguanosine-5'-Diphosphate	0.986313	0.98102	0.999483	1	0.989434	1	0.156409	1	1	1	1	0.999573	1	1	0.995123
2'-Deoxyguanosine-5'-Triphosphate	0.991058	0.089452	0.999997	1	1	1	0.104235	0.999286	1	1	1	0.996794	1	1	0.99595
2'-Deoxyuridine 3'-Monophosphate	0.845504	0.038969	0.997951	1	1	1	0.469126	0.999286	1	1	1	0.997541	1	1	0.946999
2'-Monophosphoadenosine 5'-Diphosphoribose	0.118973	0.97404	0.999266	0	0.612741	1	0.488726	1	1	1	1	0.104516	1	1	0.407585
2'-Monophosphoadenosine-5'-Diphosphate	0.845504	0.038969	0.997951	1	1	1	0.469126	0.999286	1	1	1	0.997541	1	1	0.946999
2'-O-Acetyl Adenosine-5-Diphosphoribose	0.991905	0.11141	0.999998	1	1	1	0.10218	0.999286	1	1	1	0.995176	1	1	0.995693
2',3'-Dehydro-2',3'-Deoxy-Thymidine 5'-Diphosphate	0.991058	0.089452	0.999997	1	1	1	0.104235	0.999286	1	1	1	0.996794	1	1	0.99595
2',3'-Dehydro-2',3'-Deoxy-Thymidine 5'-Triphosphate	0.991058	0.089452	0.999997	1	1	1	0.104235	0.999286	1	1	1	0.996794	1	1	0.99595
2',3'-Dideoxyadenosine-5'-Triphosphate	0.553765	0.060131	0.993962	1	1	1	0.286314	0.999286	1	1	1	1	1	1	0.849242
2',5'-DIDEOXY-ADENOSINE 3'-MONOPHOSPHATE	0.252135	0.282563	0.844529	0	0	0	0.369247	0	1	0	0	0.105344	0	0	0.400669
2(S)-Amino-6-Boronohexanoic Acid	0.373377	0.079794	0.89779	1	1	1	0.245342	0.999286	1	1	0.7	0.856144	1	1	0.709103
2[4-BROMO-2-FLUOROPHENYL)METHYL]-6-FLUOROSPIRO[ISOQUINOLINE-4-(1H),3'-PYRROLIDINE]-1,2',3,5'(2H)-TETRONE	0.905185	0.026104	0.997963	1	1	1	0.380321	0.999286	1	1	1	0.997541	1	1	0.966896
[truncated: 1,909 more rows]

## Sheet: TTD - Preclinical
Drug	KStar	NaiveBayes	MLP	IB1	Decorate	END	ThresholdSelector	JRip	PART	RandomTree	RandomForest	RotationForest	J48	SVM	Rejection_Score
[truncated: 150 more rows]

[truncated: 5 more sheets: TTD - Phase I, TTD - Phase I - II, TTD - Phase II, TTD - Phase III, TTD - Phase IV]
